# Supplementary material for: Lipid-Related Domestication Accounts for the Extreme Cold Sensitivity of Semiwild and Tropic Xishuangbanna Cucumber (Cucumis sativus L. var. xishuangbannanesis)
Source: MDPI journal article supplement (doi:10.3390/ijms25010079), 2023-12-20
Supplement: s1 [file s1]

## Supplemental figures

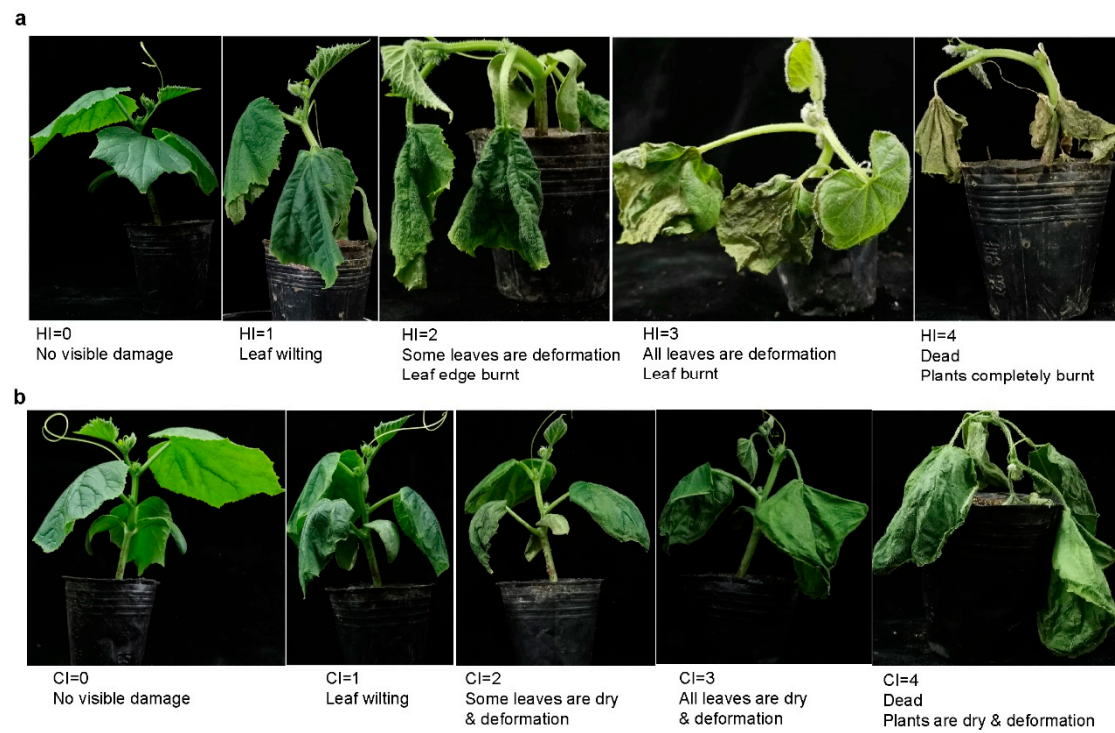

**Figure S1.** The standards to evaluate injury index in temperature-stress treatment. **(a)** High temperature treatment. **(b)** Low temperature treatment.

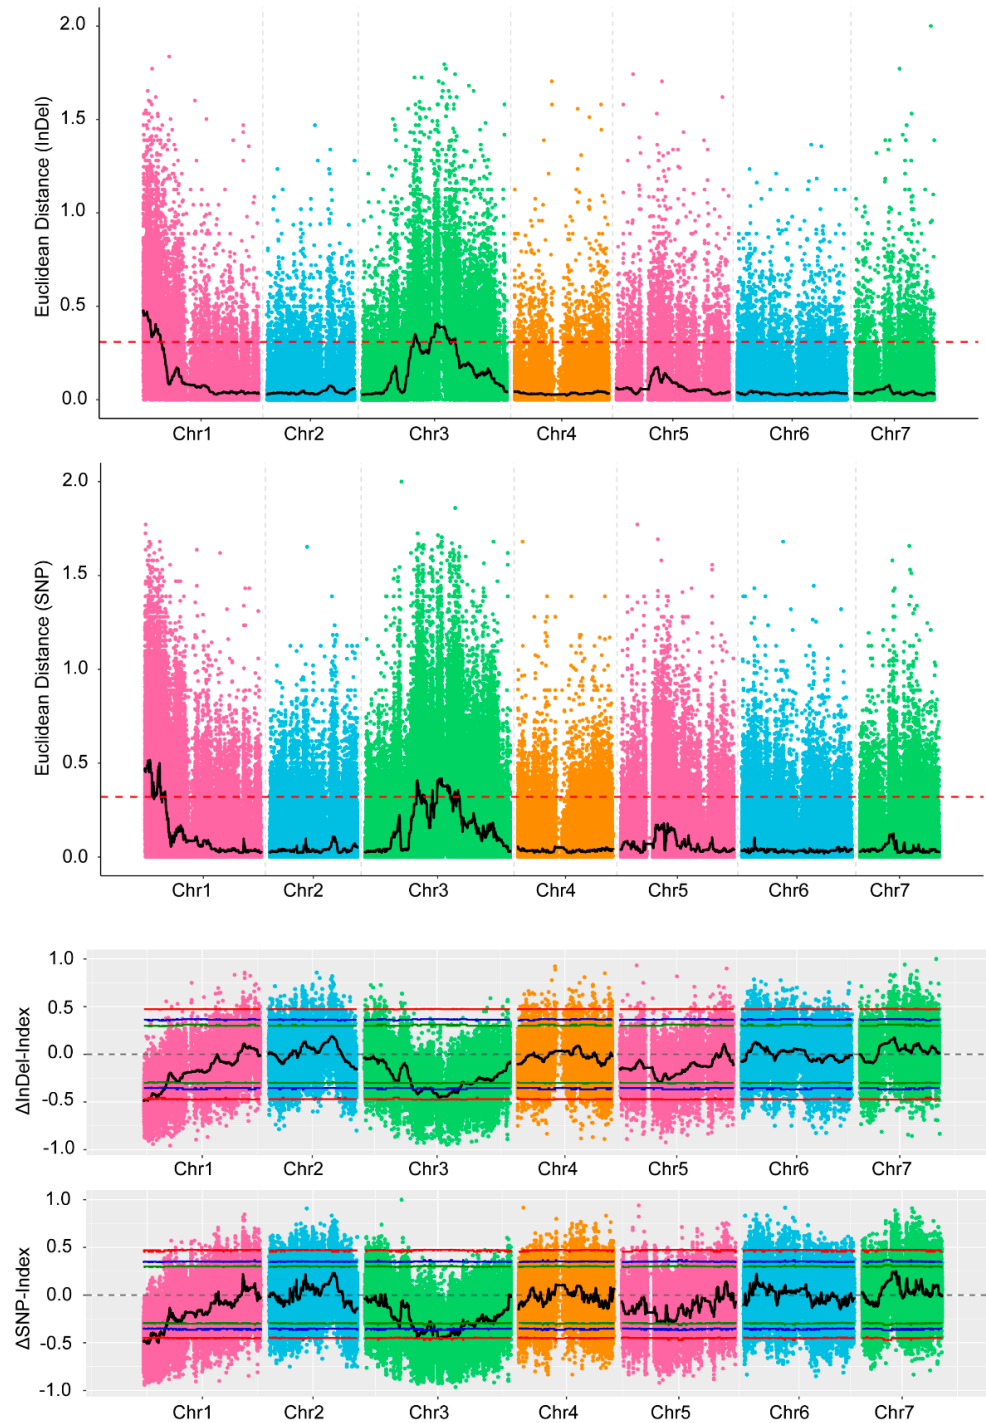

**Figure S2. Distribution of Euclidean distance (ED),  $\Delta\text{SNP-index}$ , or  $\Delta\text{InDel-index}$  in bulked segregant analysis (BSA) of heat tolerance of seedling.** A larger value of ED/ $\Delta\text{SNP-index}$ / $\Delta\text{InDel-index}$  indicates a stronger linkage of the SNP site to target trait. In ED distribution, red dashed line represents linkage threshold 0.32. In  $\Delta\text{SNP-index}$  and  $\Delta\text{InDel-index}$ , the red, blue and green lines indicate linkage threshold at 99%, 95% and 90% of confidence interval respectively;  $\Delta\text{index}=(\text{cold-R bulk})-(\text{cold-S bulk})$ .

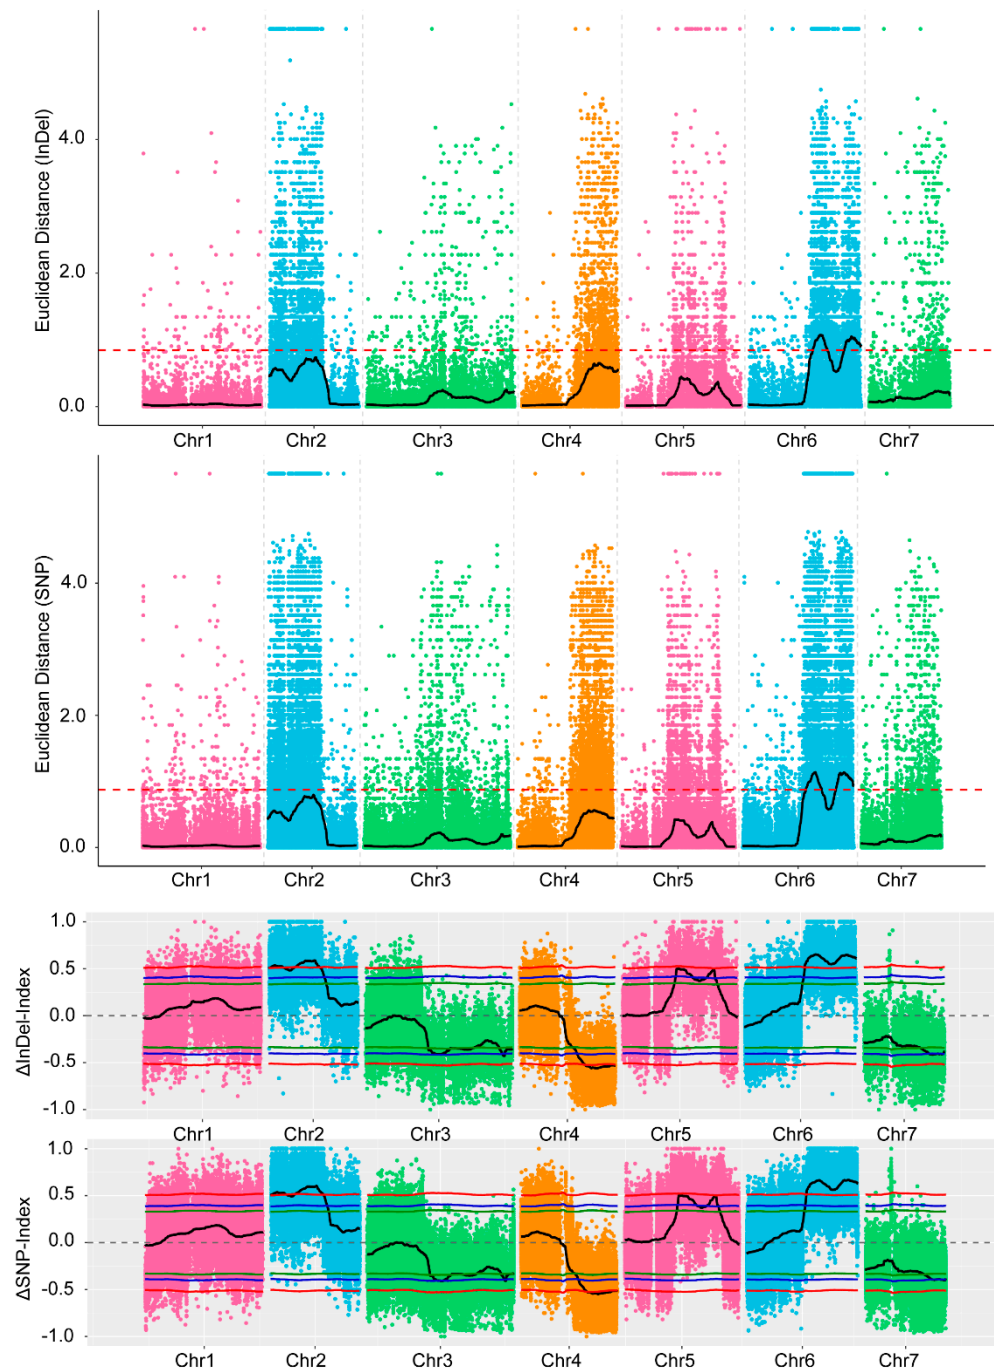

**Figure S3. Distribution of Euclidean distance (ED),  $\Delta$ SNP-index, or  $\Delta$ InDel-index in bulked segregant analysis (BSA) of cold tolerance of seedling.** A larger value of ED/ $\Delta$ SNP-index/ $\Delta$ InDel-index indicates a stronger linkage of the SNP site to target trait. In ED distribution, red dashed line represents linkage threshold 0.84. In  $\Delta$ SNP-index and  $\Delta$ InDel-index, the red, blue and green lines indicate linkage threshold at 99%, 95% and 90% of confidence interval respectively;  $\Delta$ index=(cold-R bulk)-(cold-S bulk).

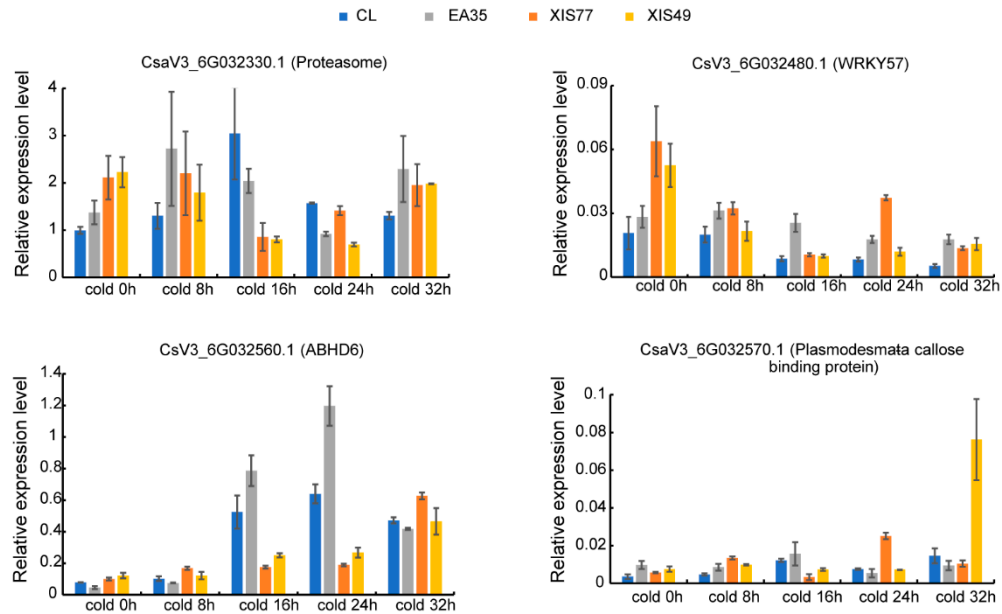

**Figure S4. Expression profile of DEGs on QTL *LTT6.1* during the cold treatment.** Expression level is quantified by qRT-PCR. Both CL and EA35 are East Asian cucumbers, and both XIS77 and XIS49 are XIS cucumbers.

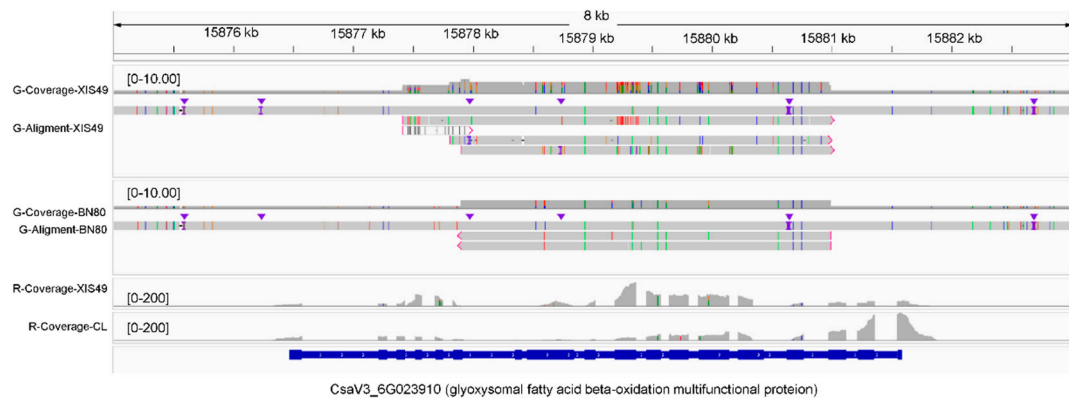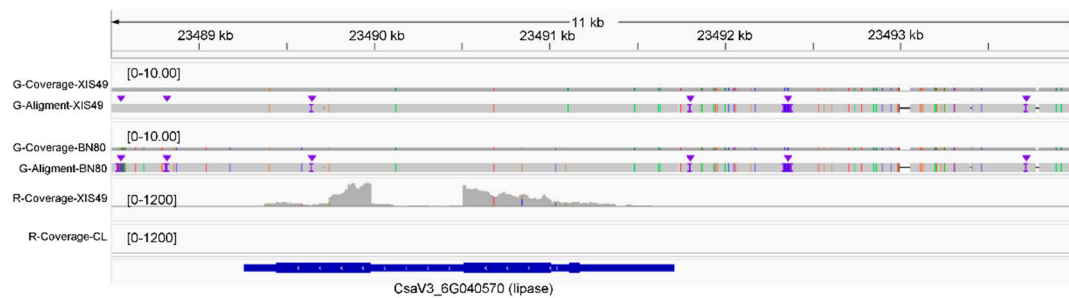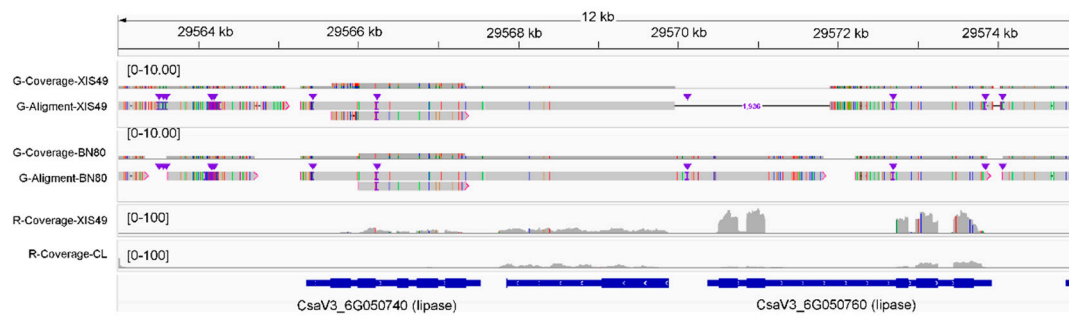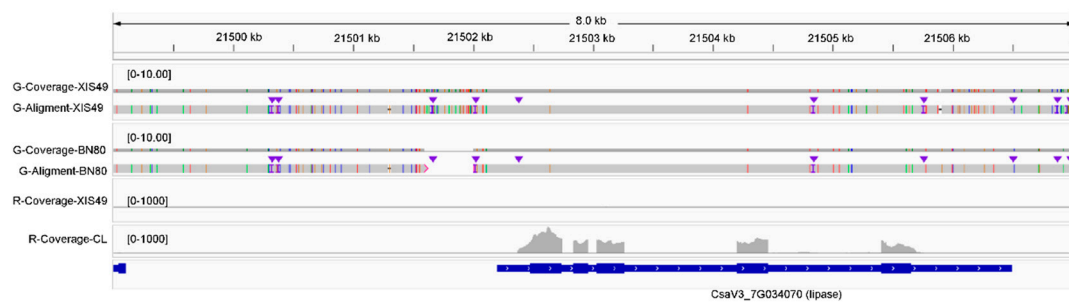

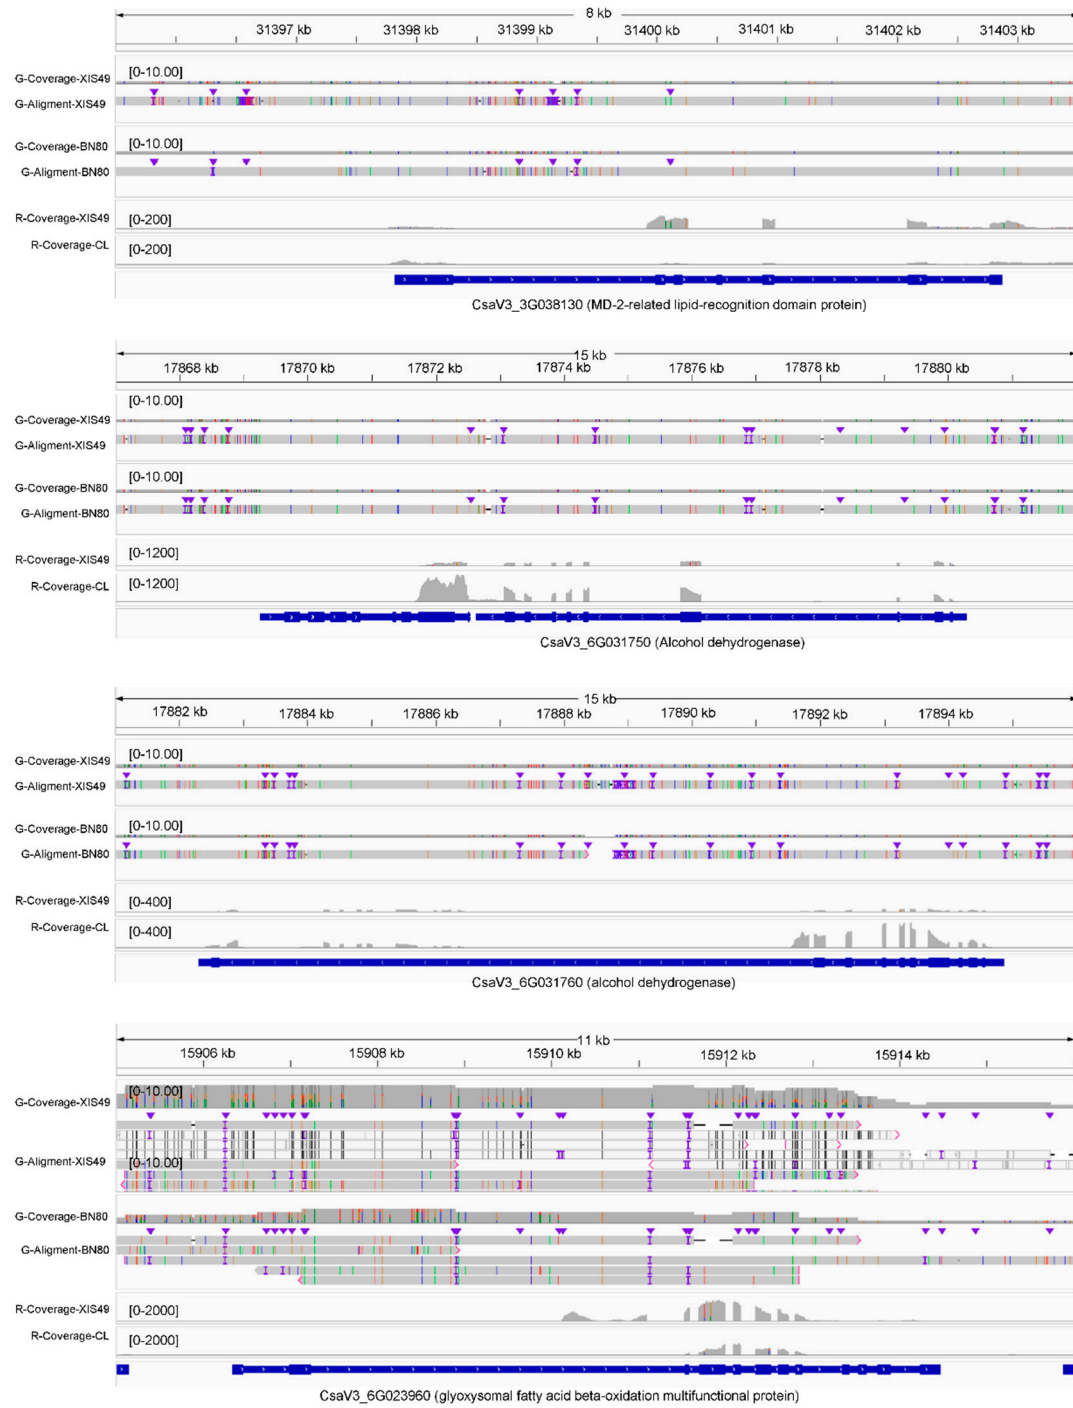

**Figure S5. Domestication SV (dSV) regulate lipid metabolism genes.** The difference in gene transcription is associated with SVs as demonstrated. SV and transcription level were vitalized by integrative genomics viewer (IGV). The inverted blue triangles indicate insertion markers. The color lines in coverage track and alignment track indicate mismatched bases.
