# Supplementary material for: Lipid-Related Domestication Accounts for the Extreme Cold Sensitivity of Semiwild and Tropic Xishuangbanna Cucumber (Cucumis sativus L. var. xishuangbannanesis)
Source: Int J Mol Sci. 2023 Dec 20;25(1):79. doi: 10.3390/ijms25010079 (PMC10779220; doi:10.3390/ijms25010079)
Supplement: Supplementary file 1 [file ijms-25-00079-s001.zip › 3. Supplementary Tables.xlsx]

## Sheet: Table S1
Table S1 Primer sequences
ID	Purpose	Primer	Primer sequence
chr6:17232549[C/T]	LTT mapping	A1	GAAGGTGACCAAGTTCATGCTGGGTAAAACGATAATTTGACCTAGC
		A2	GAAGGTCGGAGTCAACGGATT GGGGTAAAACGATAATTTGACCTAGT
		C1	AGACTCACAGTTGAACTCTTCTCACTG
Chr6:17757795[T/A]	LTT mapping	A1	GAAGGTGACCAAGTTCATGCTCGGCTTTCATTGTCCTTTAGAGT
		A2	GAAGGTCGGAGTCAACGGATTCGGCTTTCATTGTCCTTTAGAGA
		C1	AGAGCATCAAATATTCACATCCCTT
Chr6:18785981[C/T]	LTT mapping	A1	GAAGGTGACCAAGTTCATGCTGAGATGCTCAATCCCTAAAATACAC
		A2	GAAGGTCGGAGTCAACGGATTGAGATGCTCAATCCCTAAAATACAT
		C1	TGTTTCATCCCCAAATTAGAGTATT
Chr6:19178910[A/G]	LTT mapping	A1	GAAGGTGACCAAGTTCATGCTAGAATGTTGGTTGAAAAGGAGACA
		A2	GAAGGTCGGAGTCAACGGATTGAATGTTGGTTGAAAAGGAGACG
		C1	TCCAACAATGACAACAATCACTTCT
Chr6:19640099[C/T]	LTT mapping	A1	GAAGGTGACCAAGTTCATGCTGTTTGAGTTTGGTCCAATACGAAC
		A2	GAAGGTCGGAGTCAACGGATTGTTTGAGTTTGGTCCAATACGAAT
		C1	GGAAATCTCCGATCTATTCCTAAGA
Chr6:20658640[T/C]	LTT mapping	A1	GAAGGTGACCAAGTTCATGCTTGCACCATCGAGTGATTCAAGT
		A2	GAAGGTCGGAGTCAACGGATTGCACCATCGAGTGATTCAAGC
		C1	TTATTAGGAAACTGGTAGGCATTGA
Chr6:21010689[C/T]	LTT mapping	A1	GAAGGTGACCAAGTTCATGCTAAAGGATCAAAGGAGTAGGAAACC
		A2	GAAGGTCGGAGTCAACGGATTAAAAGGATCAAAGGAGTAGGAAACT
		C1	TTTCTTTTGGACTCTTTACAGTGCT
Chr6:22532185[C/A]	LTT mapping	A1	GAAGGTGACCAAGTTCATGCTGAACCGTCTGATTTTCATCATGAC
		A2	GAAGGTCGGAGTCAACGGATTGAACCGTCTGATTTTCATCATGAA
		C1	GGAGGATACTCTTGACCTCACTGAT
Chr6:24563764[G/A]	LTT mapping	A1	GAAGGTGACCAAGTTCATGCTGATTGATTGAGAGAAGAGAAAGGTTG
		A2	GAAGGTCGGAGTCAACGGATTAGATTGATTGAGAGAAGAGAAAGGTTA
		C1	TCCTGAGTCCATTACTGAAAACAAG
Chr6:27559576[G/A]	LTT mapping	A1	GAAGGTGACCAAGTTCATGCTGAGCAGGATGATATTGAAACAATAAG
		A2	GAAGGTCGGAGTCAACGGATTGAGCAGGATGATATTGAAACAATAAA
		C1	ACTTATACACGACCCTACAGTTCCA
Chr6:29419789[C/T]	LTT mapping	A1	GAAGGTGACCAAGTTCATGCTATCCTGCATTAGACAATCACCAAC
		A2	GAAGGTCGGAGTCAACGGATTATCCTGCATTAGACAATCACCAAT
		C1	ACTCGACAAGATGAAGCAATTTTAC
Chr6:31073631[G/T]	LTT mapping	A1	GAAGGTGACCAAGTTCATGCTAAAAGAAATTAGTAAGGATGAGCATTG
		A2	GAAGGTCGGAGTCAACGGATTAAAAGAAATTAGTAAGGATGAGCATTT
		C1	AGCATTATCAGATCAAGGAAGACAG
Chr1:25043[A/G]	HTT mapping	A1	GAAGGTGACCAAGTTCATGCTAACAACTTTATCAGATGTGGAAGTCA
		A2	GAAGGTCGGAGTCAACGGATTACAACTTTATCAGATGTGGAAGTCG
		C1	GAAACAGTTTATCACTTGTCCTTGC
Chr1:1711176[A/G]	HTT mapping	A1	GAAGGTGACCAAGTTCATGCTACAGTGCTCTTCTGTGGCATCA
		A2	GAAGGTCGGAGTCAACGGATTCAGTGCTCTTCTGTGGCATCG
		C1	TTTGAACAATGAGCGTAAGATCG
Chr1:3220990[T/C]	HTT mapping	A1	GAAGGTGACCAAGTTCATGCTTTAACCAAAATACAGGGGAAAATAGT
		A2	GAAGGTCGGAGTCAACGGATTAACCAAAATACAGGGGAAAATAGC
		C1	GTGGGAGAGAGCAACCTTCTTG
Chr1:4769889[C/T]	HTT mapping	A1	GAAGGTGACCAAGTTCATGCTGTACTGCTTCCGAAATTCATCTTC
		A2	GAAGGTCGGAGTCAACGGATTGTACTGCTTCCGAAATTCATCTTT
		C1	TCCGACAATAGGCTTAGAAAACC
Chr3:14515008[T/C]	HTT mapping	A1	GAAGGTGACCAAGTTCATGCTTCTTCTTAGATTCCGTGGAGCAT
		A2	GAAGGTCGGAGTCAACGGATTTCTTCTTAGATTCCGTGGAGCAC
		C1	TCCGACAATAGGCTTAGAAAACC
Chr3:15005294[C/T]	HTT mapping	A1	GAAGGTGACCAAGTTCATGCTAATGGCGTAGCCCCATAGC
		A2	GAAGGTCGGAGTCAACGGATTAGAATGGCGTAGCCCCATAGT
		C1	TCCGACAATAGGCTTAGAAAACC
Chr3:20545163[T/C]	HTT mapping	A1	GAAGGTGACCAAGTTCATGCTGCTGATGCTCAGGTTGAATACAAT
		A2	GAAGGTCGGAGTCAACGGATTGCTGATGCTCAGGTTGAATACAAC
		C1	GCCATTCCTTGCTAGAAAATACG
Chr3:25336300[T/C]	HTT mapping	A1	GAAGGTGACCAAGTTCATGCTAGTCCTACCCACAAACCAAGTTCT
		A2	GAAGGTCGGAGTCAACGGATTTCCTACCCACAAACCAAGTTCC
		C1	TCCCTCAAAAGCCACATAATAGC
Chr3:25735331[T/C]	HTT mapping	A1	GAAGGTGACCAAGTTCATGCTTTCGATGCTGGAAAATAGCAAT
		A2	GAAGGTCGGAGTCAACGGATTTTCGATGCTGGAAAATAGCAAC
		C1	ATCCAGTATGTCAAACTATGGTGACA
Chr3:26140281[C/G]	HTT mapping	A1	GAAGGTGACCAAGTTCATGCTCTTGAATGAGATGGACATCTCCC
		A2	GAAGGTCGGAGTCAACGGATTCTTGAATGAGATGGACATCTCCG
		C1	TGTGATTCATGTGCACTATTTGTTG
Chr3:27589550[T/C]	HTT mapping	A1	GAAGGTGACCAAGTTCATGCTATTACTGGTGAAAGAGAAGAAGGTTT
		A2	GAAGGTCGGAGTCAACGGATTATTACTGGTGAAAGAGAAGAAGGTTC
		C1	GGAAGATAAAGGTAAAGGGATGGT
CsaV3_6G032330	qRT-PCR	F	TGTTGGGACTATGATTGCTGGAT
		R	CACTGGCACCATCTCGGAAAG
CsaV3_6G032480	qRT-PCR	F	CAGCCAAGATTTGCGTTCAT
		R	CTTCACACGACCGTTCTACCC
CsaV3_6G032560	qRT-PCR	F	ACAACATCAAAGACCAATCTGCTC
		R	GGAGAAGAACCACAGGACAGTCT
CsaV3_6G032570	qRT-PCR	F	CGACACCAGGAACCACAACAAA
		R	GAAGAAGAACAAGTTAGAGGCTGC

## Sheet: Table S2
Table S2 Composition of long chain fatty acids standards
No.	Abbreviation	Name	Account (%)
1	C4:0	Butyrate	2.63
2	C6:0	Hexanoate	2.63
3	C8:0	Octanoate	2.63
4	C10:0	Decanoate	2.63
5	C11:0	Undecanoate	2.63
6	C12:0	Laurate	2.63
7	C13:0	Tridecanoate	2.63
8	C14:0	Myristate	2.63
9	C14:1	Myristoleate	2.63
10	C15:0	Pentadecanoate	2.63
11	C15:1	Pentadecenoate	2.63
12	C16:0	Palmitate	5.26
13	C16:1	Palmitoleate	2.63
14	C17:0	Heptadecanoate	2.63
15	C17:1	Heptadecenoate	2.63
16	C18:0	Stearate	2.63
17	C18:1	Oleate	2.63
18	C18:1T	Elaidate	2.63
19	C18:2	Linoleate	2.63
20	C18:2TT	Linoelaidate	2.63
21	C18:3N6	Gamma-Linolenate	2.63
22	C18:3N3	Linolenate	2.63
23	C20:0	Arachidate	2.63
24	C20:1	11-Eicosenoate	2.63
25	C20:2	11,14-Eicosadienoate	2.63
26	C21:0	Heneicosadienoate	2.63
27	C20:3N6	HomogammaLinolenate	2.63
28	C20:4N6	Arachidonate	2.63
29	C20:3N3	11,14,17-Eicosatrienoate	2.63
30	C20:5N3	Eicosapentaenoate	2.63
31	C22:0	Behenate	2.63
32	C22:1N9	Erucate	2.63
33	C22:2	Docosadienoate	2.63
34	C23:0	Tricosanoate	2.63
35	C24:0	Lignocerate	2.63
36	C24:1	Nervonate	2.63
37	C22:6N3	Docosahexaenoate	2.63

## Sheet: Table 3
Table S3 Composition of short chain fatty acids standards
No.	Component Name	Abbre.	RT(min)	m/z	Standard curve	r-value	μg/mL	QCRSD (%)1	XIS49	CL	p-value
									μg/g	μg/g
1	Acetic acid	-	4.799	43	Y=0.0121x+0.0021	0.997	0.05~500	3.19	124.63	134.11	0.01
2	Propionic acid	-	5.886	74	Y=0.0131x+0.0006	0.998	0.05~500	1.9	3.18	3.9	0
3	Isobutyric acid	-	6.28	43	Y=0.0245x+0.0011	0.996	0.05~500	0.99	5.93	5.72	0
4	Butyric acid	-	7.188	60	Y=0.0350x+0.0011	0.996	0.05~500	1.68	0.92	0.92	0.64
5	Isopenoic acid	-	7.833	60	Y=0.0390x+0.0005	0.994	0.05~500	0.4	0.22	0.21	0
6	Pentanoic acid	-	8.979	60	Y=0.0412x+0.0011	0.996	0.05~500	0.32	0.63	0.78	0
7	Caproic acid	-	10.34	60	Y=0.0330x+0.0052	0.99	0.05~500	12.65	2.07	1.75	0
8	11,14-Eicosadienoic acid	C20:2	24.833	81	Y=0.0184x+0.0004841	1	0.0263~26.30	6	0.57	0.53	0.85
9	Arachidic acid	C20:0	24.053	74	Y=0.03928x+0.01485	0.994	0.0263~26.30	7.14	10.05	9.57	0.8
10	Decanoic acid	C10:0	12.799	74	Y=0.06344x+0.02360	0.993	0.0263~26.30	7.01
11	Eicosenoic acid	C20:1	24.311	55	Y=0.0156x+0.0007872	0.999	0.0263~26.30	7.05	0.74	0.59	0.13
12	Gamma-Linolenic acid	C18:3N6	22.72	79	Y=0.02364x+0.001285	1	0.0263~26.30	ND	2.08	1.76	0.7
13	Heneicosadienoic acid	C21:0	25.124	74	Y=0.03297x+0.009912	0.996	0.0263~26.30	7.06
14	Heptadecanoic acid	C17:0	20.334	74	Y=0.05330x+0.02525	0.995	0.0263~26.30	4.67	9.33	8.33	0.12
15	Heptadecenoic acid	C17:1	20.618	55	Y=0.01846x+0.01011	0.997	0.0263~26.30	5.92	7.77	7.29	0.42
16	Hexanoic acid	C6:0	7.021	74	Y=0.04708x+0.0009754	0.993	0.0263~13.15	4.45	1.09	1.03	0.12
17	Lauric acid	C12:0	15.208	74	Y=0.06598x+0.01929	0.998	0.0263~26.30	6.65
18	Linoleic acid	C18:2	22.29	67	Y=0.0212x+0.01476	0.994	0.0526~52.60	6.32	130.02	119.84	0.45
19	Linolenic acid	C18:3N3	23.215	79	Y=0.02866x+0.004047	0.998	0.0263~26.30	4.88	1002.34	997.25	0.87
20	Myristic acid	C14:0	17.392	74	Y=0.06506x+0.02896	0.994	0.0263~26.30	11.56	6.52	5.89	0.65
21	Myristoleic acid	C14:1	17.79	55	Y=0.02256x+0.01391	0.996	0.0263~26.30	7.07	37.25	33.97	0.33
22	Octanoic acid	C8:0	10.092	74	Y=0.06578x+0.007918	1	0.0263~26.30	4.36
23	Oleic acid	C18:1	21.676	55	Y=0.01644x+0.00922	0.999	0.0526~52.60	7.15	58.97	53.33	0.13
24	Palmitic acid	C16:0	19.389	74	Y=0.05321x+0.05006	0.997	0.0526~52.60	4.75	840.23	800.05	0.07
25	Palmitoleic acid	C16:1	19.654	236	Y=0.00795x+0.0004609	1	0.0263~26.30	3.81	6.12	6.42	0.04
26	Pentadecanoic acid	C15:0	18.414	74	Y=0.06831x+0.02370	0.996	0.0263~26.30	3.71
27	Pentadecenoic acid	C15:1	18.795	55	Y=0.02535x+0.008073	0.997	0.0263~26.30	12.57
28	Stearic acid	C18:0	21.403	74	Y=0.05692x+0.008251	0.998	0.0263~26.30	7.81	459.21	436.89	0.73
29	Tridecanoic acid	C13:0	16.326	74	Y=0.05911x+0.03280	0.993	0.0263~26.30	11.36
30	Undecanoic acid	C11:0	14.037	74	Y=0.06745x+0.02225	0.996	0.0263~26.30	3.24
1QCRSD=SD/mean

## Sheet: Table S4
Table S4 Detection method and quality control of free amino acid
NO	Component Name	RT (min)	m/z	QCRSD	XIS49	CL	SE-XIS49	SE-CL	p-value
1	Alanine	4.6	90.1/43.9	0.0635	1.24909e+07	1.33403e+07	115184	236122	0.0088364
2	Arginine	6.38	175.1/70	0.014	1.98911e+07	2.59869e+07	121402	180463	1.08624e-06
3	Asparagine	4.96	133.1/87	0.0529	2.48165e+07	18789581	115529	19837	1.052e-07
4	Aspartate	5.15	134/74.1	0.0638	2.64527e+07	2.68182e+07	138940	70848.3	0.00950137
5	Citrulline	5.04	176.1/159.2	0.07	4.13765e+07	3.81051e+07	159163	125991	9.89503e-06
6	Creatine	4.61	132.1/90	0.0432	51197.2	50806.3	1596.51	592.551	0.477648
7	Creatinine	2.84	114.1/44	0.0405	14115.4	15245.6	662.071	918.279	0.313157
8	Cysteine	4.71	122.1/76	0.0203	11314.3	11042.1	238.072	51.3066	0.0140007
9	Glutamate	5.06	148.1/84.1	0.0604	52777215	50541622	220426	208953	0.00022783
10	Glutamine	4.88	147/84.1	0.0533	5.97258e+07	5.92853e+07	1.0374e+06	209476	0.49333
11	Glycine	4.81	76/30.1	0.0692	79889.6	71436.4	1032.43	747.279	0.000494829
12	Histidine	5.19	156.1/110.1	0.0836	1.38827e+07	1.24053e+07	377046	153911	0.00203187
13	Hydroxyproline	4.61	132.1/67.9	0.0859	113006	100739	2043.62	876.395	0.00132667
14	Isoleucine	3.89	132.1/86.201	0.0683	2.22353e+07	2.18717e+07	171149	157013	0.0345783
15	Leucine	3.78	132.1/86.2	0.0037	2.64174e+07	2.59787e+07	91550.8	107192	0.0068342
16	Lysine	4.88	147.1/84	0.0637	6.18773e+07	6.18849e+07	1.51176e+06	727104	0.394906
17	Methionine	4	150.1/133	0.037	2.17495e+06	1.79118e+06	3098.54	7140.32	1.07499e-07
18	Ornithine	4.97	133.1/70.1	0.0402	3.03979e+06	2.32223e+06	21850.5	4975.06	6.48339e-07
19	Phenylalanine	3.74	166.1/103.1	0.015	7.78298e+06	9.37985e+06	36339.2	35227.8	7.76757e-07
20	Proline	4.23	116.1/70.1	0.044	3.73361e+07	3.2474e+07	157191	108040	1.77182e-06
21	Putrescine	1.33	89/72	0.0828	48560.7	90140.4	1806.02	1815.89	8.18595e-06
22	Serine	4.94	106/60	0.0479	1.81517e+07	1.51228e+07	44017.7	34831.3	8.15928e-08
23	Spermidine	1.73	146.2/72.2	0.0519	443402	312519	4120.09	695.402	7.01736e-07
24	Threonine	4.71	120/74	0.0423	3.39767e+06	3.29763e+06	15504	19504.8	0.00364395
25	Tryptophan	3.75	205.1/146.3	0.0866	1.89086e+06	2.19656e+06	37351.4	59156.9	0.00227821
26	Tyrosine	4.16	182.1/136.1	0.0717	1.68194e+06	1.73106e+06	34724.2	34972.3	0.234917
27	Valine	4.15	118.1/72.1	0.0541	2.23152e+07	2.13691e+07	86871.2	69206.4	0.000167768

## Sheet: Table S5
Table S5 Summary of BSA-DNA sequencing
	Content	CL/CL-like 1	XIS49/XIS49-like 2
Parents	Clean bases	5166863584	5576680876
	Clean reads	17350146	18722226
	Q30 (%)	92.89	93.28
	Mapped (%)	95.56	94.66
	Cov ratio 10X (%)	77.13	79.32
	SNP number	21230	725036
	number of small InDel	15434	206936
Pools of BSA-seedlings in cold treatment	Clean bases	9490542936	9773704030
	Clean reads	31865540	32790685
	Q30 (%)	93.56	92.91
	Mapped (%)	94.99	95.52
	Coverage ratio 10X (%)	97.13	96.72
	SNP number	598477	692200
	Number of small InDel	174723	200301
Pools of BSA-seedlings in heat treatment	Clean bases	10260842880	12216875544
	Clean reads	34429083	40996434
	Q30 (%)	92.56	92.76
	Mapped (%)	95.08	95.66
	Coverage ratio 10X (%)	97.97	93.86
	SNP number	700166	669485
	Number of small InDel	202903	197523
1 CL-like, pool of individual plants that show the same trait as CL; 2 XIS49-like, pool of individual plants that show the same trait as CL.

## Sheet: Table S6
Table S6 SV-Genes on HTT loci
	CL genome									XIS49 genome
SV_ID	SV-chr	SV-start	SV-start-position	SV-end	SV-end-position	SV-gene	SV-gene strain	Interpro-annot	Nr-annot	SV-chr	SV-start	SV-start-position	SV-end	SV-end-position	SV-gene	SV-gene strain	Interpro-annot	Nr-annot
BN-CPL2	chr1	98950	intron6	99033	intron6	CsaV3_1G000110.1	-	Dual specificity phosphatase, catalytic domain IPR015275	hypothetical protein CICLE_v10030650mg [Citrus clementina]	chr1	162855	intron6	162861	intron6	BNv1_01G00318	-	Dual specificity phosphatase, catalytic domain IPR015275	hypothetical protein CICLE_v10030650mg [Citrus clementina]
BN-HDR3	chr1	107840	up2kb	107891	up2kb	CsaV3_1G000110.1	-	Dual specificity phosphatase, catalytic domain IPR015275	hypothetical protein CICLE_v10030650mg [Citrus clementina]	chr1	171656	up2kb	171718	up2kb	BNv1_01G00318	-	Dual specificity phosphatase, catalytic domain IPR015275	hypothetical protein CICLE_v10030650mg [Citrus clementina]
BN-HDR3	chr1	107840	down2kb	107891	down2kb	CsaV3_1G000120.1	-		-	chr1	171656	down2kb	171718	down2kb	BNv1_01G00319	-		-
BN-HDR3	chr1	107840	up2kb	107891	up2kb	CsaV3_1G000130.1	+		uncharacterized protein LOC101207324 [Cucumis sativus]	chr1	171656	up2kb	171718	up2kb	BNv1_01G00320	+		uncharacterized protein LOC101207324 [Cucumis sativus]
BN-TDM5	chr1	127409	intron12	127530	intron12	CsaV3_1G000170.1	-	Poly A polymerase, head domain IPR032828	poly(A) polymerase [Cucumis melo subsp. melo]	chr1	191208	intron11	191278	intron11	BNv1_01G00326	-	Poly A polymerase, head domain IPR032828	poly(A) polymerase [Cucumis melo subsp. melo]
BN-TDM5	chr1	127409	down2kb	127530	down2kb	CsaV3_1G000180.1	+	Mitochondrial substrate/solute carrier	mitochondrial phosphate carrier protein 3, mitochondrial-like isoform X2 [Cucumis sativus]	chr1	191208	down2kb	191278	down2kb	BNv1_01G00325	+	Mitochondrial substrate/solute carrier	mitochondrial phosphate carrier protein 3, mitochondrial-like isoform X2 [Cucumis sativus]
BN-INVDP4829	chr1	172136	up2kb	174716	intron	CsaV3_1G000270.1	-		exosome complex component RRP4-like [Cucumis sativus]	chr4	21347950	-	21350529	-	-	-		-
BN-INVDP4829	chr1	172136	-	174716	-	-	-		-	chr4	21347950	down2kb	21350529	-	BNv1_04G12648	+	Ulp1 protease family, C-terminal catalytic domain IPR015410	hypothetical protein CICLE_v10017905mg, partial [Citrus clementina]
BN-INVDP4829	chr1	172136	-	174716	-	-	-		-	chr4	21347950	down2kb	21350529	up2kb	BNv1_04G12649	-		uncharacterized protein LOC102623185 [Citrus sinensis]
BN-INVTR4830	chr1	174710	intron	178647	down2kb	CsaV3_1G000280.1	-		-	chr5	3741079	-	3744997	-	-	-		-
BN-HDR6	chr1	187201	down2kb	187280	down2kb	CsaV3_1G000300.1	+	SWEET sugar transporter	bidirectional sugar transporter SWEET12-like [Cucumis sativus]	chr1	244458	down2kb	244515	down2kb	BNv1_01G00338	+	SWEET sugar transporter	bidirectional sugar transporter SWEET12-like [Cucumis sativus]
BN-HDR6	chr1	187201	-	187280	-	-	-		-	chr1	244458	intron2	244515	intron2	BNv1_01G00339	+		-
BN-HDR8	chr1	251404	up2kb	251657	up2kb	CsaV3_1G000420.1	-	Ribosomal RNA-processing protein 14, N-terminal IPR029190	ribosomal RNA-processing protein 14-C [Cucumis sativus]	chr1	308570	up2kb	308791	up2kb	BNv1_01G00350	-	Ribosomal RNA-processing protein 14, N-terminal IPR029190	ribosomal RNA-processing protein 14-C [Cucumis sativus]
BN-HDR8	chr1	251404	down2kb	251657	down2kb	CsaV3_1G000430.1	-	Heavy metal-associated domain, HMA	hypothetical protein Csa_1G051620 [Cucumis sativus]	chr1	308570	down2kb	308791	down2kb	BNv1_01G00351	-	Heavy metal-associated domain, HMA	hypothetical protein Csa_1G051620 [Cucumis sativus]
BN-HDR9	chr1	259522	up2kb	259978	up2kb	CsaV3_1G000440.1	-		Uncharacterized protein TCM_014671 [Theobroma cacao]	chr1	316666	up2kb	317124	up2kb	BNv1_01G00352	-		-
BN-TDM10	chr1	263241	exon2	263317	exon2	CsaV3_1G000450.1	+	Transcription factor, SBP-box	squamosa promoter-binding-like protein 13A [Cucumis sativus]	chr1	320383	up2kb	320486	up2kb	BNv1_01G00353	+	Transcription factor, SBP-box	squamosa promoter-binding-like protein 13A [Cucumis sativus]
BN-HDR11	chr1	275702	up2kb	275809	up2kb	CsaV3_1G000480.1	+	PB1 domain IPR000644	CBS domain-containing protein CBSCBSPB5 isoform X2 [Cucumis sativus]	chr1	332868	up2kb	332945	up2kb	BNv1_01G00357	+	PB1 domain IPR000644	CBS domain-containing protein CBSCBSPB5 isoform X2 [Cucumis sativus]
BN-HDR11	chr1	275702	up2kb	275809	up2kb	CsaV3_1G000470.1	-	Protein of unknown function DUF3339	uncharacterized protein LOC101212373 [Cucumis sativus]	chr1	332868	-	332945	-	-	-		-
BN-INVDP4831	chr1	458423	intron34	458692	intron34	CsaV3_1G000760.1	-	Glycosyl transferase, family 48 IPR026899	callose synthase 10-like [Citrus sinensis]	chr3	1813177	-	1813446	-	-	-		-
BN-INVDP4831	chr1	458423	-	458692	-	-	-		-	chr3	1813177	intron1	1813446	intron1	BNv1_03G06658	-		-
BN-DUP4832	chr1	594485	up2kb	595505	up2kb	CsaV3_1G001020.1	+	Leucine-rich repeat	plant intracellular Ras-group-related LRR protein 9 [Cucumis sativus]	chr4	29609974	-	29610994	-	-	-		-
BN-DUP4832	chr1	594485	-	595505	-	-	-		-	chr4	29609974	up2kb	29610994	-	BNv1_04G13419	-	DOMON domain IPR006593	cytochrome b561, DM13 and DOMON domain-containing protein At5g54830 [Cucumis sativus]
BN-DUP4832	chr1	594485	-	595505	-	-	-		-	chr4	29609974	up2kb	29610994	up2kb	BNv1_04G13420	+	ATPase, AAA-type, core IPR004176	chaperone protein ClpB4, mitochondrial [Cucumis sativus]
BN-CPL15	chr1	681306	down2kb	681404	down2kb	CsaV3_1G001190.1	+	Histone deacetylase domain	histone deacetylase 6 [Cucumis sativus]	chr1	740583	down2kb	740633	down2kb	BNv1_01G00424	+	Histone deacetylase domain	histone deacetylase 6 [Cucumis sativus]
BN-CPL15	chr1	681306	up2kb	681404	up2kb	CsaV3_1G001200.1	+	Pentatricopeptide repeat	putative pentatricopeptide repeat-containing protein At1g64310 [Cucumis sativus]	chr1	740583	up2kb	740633	up2kb	BNv1_01G00425	+	Pentatricopeptide repeat	putative pentatricopeptide repeat-containing protein At1g64310 [Cucumis sativus]
BN-CPL15	chr1	681306	intron	681404	up2kb	CsaV3_1G001210.1	+		-	chr1	740583	-	740633	up2kb	BNv1_01G00426	+		-
BN-HDR16	chr1	687143	up2kb	687330	intron	CsaV3_1G001220.1	-	DUF3741-associated sequence motif	Uncharacterized protein TCM_014522 [Theobroma cacao]	chr1	746371	up2kb	746556	-	BNv1_01G00427	-	DUF3741-associated sequence motif	Uncharacterized protein TCM_014522 [Theobroma cacao]
BN-INS17	chr1	696522	down2kb	696525	down2kb	CsaV3_1G001230.1	+	Lateral organ boundaries, LOB	protein LATERAL ORGAN BOUNDARIES [Cucumis sativus]	chr1	755755	down2kb	755810	down2kb	BNv1_01G00428	+	Lateral organ boundaries, LOB	protein LATERAL ORGAN BOUNDARIES [Cucumis sativus]
BN-DEL18	chr1	706235	down2kb	706588	down2kb	CsaV3_1G001240.1	+		uncharacterized protein LOC101204691 [Cucumis sativus]	chr1	765478	down2kb	765479	down2kb	BNv1_01G00429	+		uncharacterized protein LOC101204691 [Cucumis sativus]
BN-DEL18	chr1	706235	-	706588	-	-	-		-	chr1	765478	down2kb	765479	down2kb	BNv1_01G00430	-	Alliinase, C-terminal	tryptophan aminotransferase-related protein 2-like isoform X1 [Cucumis sativus]
BN-CPL19	chr1	730794	up2kb	730856	up2kb	CsaV3_1G001260.1	+	G-patch domain	uncharacterized protein LOC102611874 [Citrus sinensis]	chr1	789753	up2kb	789779	up2kb	BNv1_01G00432	+	G-patch domain	uncharacterized protein LOC102611874 [Citrus sinensis]
BN-DEL20	chr1	827233	intron3	827378	intron3	CsaV3_1G001390.1	+		hypothetical protein PRUPE_ppa007436mg [Prunus persica]	chr1	886112	intron3	886116	intron3	BNv1_01G00444	+		hypothetical protein PRUPE_ppa007436mg [Prunus persica]
BN-INVDP4094	chr1	836654	intron10	837219	intron10	CsaV3_1G001400.1	-		hypothetical protein PRUPE_ppa018433mg, partial [Prunus persica]	chr1	3387920	-	3388490	-	-	-		-
BN-INVDP4094	chr1	836654	-	837219	-	-	-		-	chr1	3387920	intron1	3388490	intron1	BNv1_01G00799	-	DnaJ domain	hypothetical protein PRUPE_ppa027015mg, partial [Prunus persica]
BN-CPG21	chr1	873736	exon1	873743	exon1	CsaV3_1G001440.1	+	WD40 repeat	hypothetical protein PRUPE_ppa007997mg [Prunus persica]	chr1	932443	up2kb	932492	up2kb	BNv1_01G00449	+	WD40 repeat	hypothetical protein PRUPE_ppa007997mg [Prunus persica]
BN-INS22	chr1	904442	intron16	904446	intron16	CsaV3_1G001470.1	+	Phosphatidylinositol 3-/4-kinase, catalytic domain IPR003152	Ataxia telangiectasia mutated, putative [Theobroma cacao]	chr1	963217	intron16	963486	intron16	BNv1_01G00452	+	Phosphatidylinositol 3-/4-kinase, catalytic domain IPR003152	Ataxia telangiectasia mutated, putative [Theobroma cacao]
BN-INS24	chr1	935156	intron51	935157	intron51	CsaV3_1G001470.1	+	Phosphatidylinositol 3-/4-kinase, catalytic domain IPR003152	Ataxia telangiectasia mutated, putative [Theobroma cacao]	chr1	994139	intron51	994195	intron51	BNv1_01G00452	+	Phosphatidylinositol 3-/4-kinase, catalytic domain IPR003152	Ataxia telangiectasia mutated, putative [Theobroma cacao]
BN-CPL25	chr1	940966	intron59	941747	intron59	CsaV3_1G001470.1	+	Phosphatidylinositol 3-/4-kinase, catalytic domain IPR003152	Ataxia telangiectasia mutated, putative [Theobroma cacao]	chr1	1000265	intron59	1000655	intron59	BNv1_01G00452	+	Phosphatidylinositol 3-/4-kinase, catalytic domain IPR003152	Ataxia telangiectasia mutated, putative [Theobroma cacao]
BN-HDR23	chr1	918628	intron29	918681	intron29	CsaV3_1G001470.1	+	Phosphatidylinositol 3-/4-kinase, catalytic domain IPR003152	Ataxia telangiectasia mutated, putative [Theobroma cacao]	chr1	977695	intron29	977742	intron29	BNv1_01G00452	+	Phosphatidylinositol 3-/4-kinase, catalytic domain IPR003152	Ataxia telangiectasia mutated, putative [Theobroma cacao]
BN-CPL28	chr1	965041	intron2	965202	intron2	CsaV3_1G001490.1	+	Protein of unknown function DUF1645, plant	Uncharacterized protein TCM_012072 [Theobroma cacao]	chr1	1023910	-	1023990	-	-	-		-
BN-CPL28	chr1	965041	down2kb	965202	down2kb	CsaV3_1G001500.1	-	1-deoxy-D-xylulose 5-phosphate reductoisomerase, N-terminal IPR013644	1-deoxy-D-xylulose 5-phosphate reductoisomerase, chloroplastic [Cucumis sativus]	chr1	1023910	-	1023990	-	-	-		-
BN-HDR27	chr1	959932	up2kb	960194	up2kb	CsaV3_1G001490.1	+	Protein of unknown function DUF1645, plant	Uncharacterized protein TCM_012072 [Theobroma cacao]	chr1	1018825	-	1019067	up2kb	BNv1_01G00454	+	Protein of unknown function DUF1645, plant	Uncharacterized protein TCM_012072 [Theobroma cacao]
BN-HDR30	chr1	1002652	up2kb	1002894	up2kb	CsaV3_1G001550.1	-	Domain of unknown function DUF588	hypothetical protein PRUPE_ppa009176mg [Prunus persica]	chr1	1061280	up2kb	1061407	up2kb	BNv1_01G00459	-	Domain of unknown function DUF588	hypothetical protein PRUPE_ppa009176mg [Prunus persica]
BN-HDR30	chr1	1002652	down2kb	1002894	down2kb	CsaV3_1G001560.1	-	UVR domain IPR021894	hypothetical protein POPTR_0012s08110g [Populus trichocarpa]	chr1	1061280	down2kb	1061407	down2kb	BNv1_01G00460	-	UVR domain IPR021894	hypothetical protein POPTR_0012s08110g [Populus trichocarpa]
BN-CPL31	chr1	1003873	down2kb	1003928	down2kb	CsaV3_1G001560.1	-	UVR domain IPR021894	hypothetical protein POPTR_0012s08110g [Populus trichocarpa]	chr1	1062386	down2kb	1062401	down2kb	BNv1_01G00460	-	UVR domain IPR021894	hypothetical protein POPTR_0012s08110g [Populus trichocarpa]
BN-CPL32	chr1	1010335	up2kb	1010436	up2kb	CsaV3_1G001560.1	-	UVR domain IPR021894	hypothetical protein POPTR_0012s08110g [Populus trichocarpa]	chr1	1068785	up2kb	1068834	up2kb	BNv1_01G00460	-	UVR domain IPR021894	hypothetical protein POPTR_0012s08110g [Populus trichocarpa]
BN-CPL32	chr1	1010335	-	1010436	-	-	-		-	chr1	1068785	down2kb	1068834	down2kb	BNv1_01G00461	-	Zinc finger, RING-type	E3 ubiquitin-protein ligase SIS3 isoform X1 [Cucumis sativus]
BN-CPG33	chr1	1017470	up2kb	1017478	up2kb	CsaV3_1G001570.1	-	Zinc finger, RING-type	E3 ubiquitin-protein ligase SIS3 isoform X1 [Cucumis sativus]	chr1	1075878	up2kb	1076021	up2kb	BNv1_01G00461	-	Zinc finger, RING-type	E3 ubiquitin-protein ligase SIS3 isoform X1 [Cucumis sativus]
BN-HDR34	chr1	1021569	up2kb	1022035	up2kb	CsaV3_1G001580.1	+	BURP domain	Polygalacturonase-1 non-catalytic subunit beta [Cucumis sativus]	chr1	1080126	-	1080614	up2kb	BNv1_01G00462	+	BURP domain	Polygalacturonase-1 non-catalytic subunit beta [Cucumis sativus]
BN-CPL38	chr1	1055120	intron8	1055245	intron8	CsaV3_1G001620.1	+		hypothetical protein PRUPE_ppa017088mg [Prunus persica]	chr1	1113475	intron8	1113487	intron8	BNv1_01G00466	+		hypothetical protein PRUPE_ppa017088mg [Prunus persica]
BN-HDR37	chr1	1051457	intron1	1052088	intron1	CsaV3_1G001620.1	+		hypothetical protein PRUPE_ppa017088mg [Prunus persica]	chr1	1109964	intron1	1110454	intron1	BNv1_01G00466	+		hypothetical protein PRUPE_ppa017088mg [Prunus persica]
BN-HDR45	chr1	1166462	down2kb	1166467	down2kb	CsaV3_1G001790.1	+	Haem peroxidase, plant/fungal/bacterial	peroxidase 41-like [Cucumis sativus]	chr1	1224737	down2kb	1224819	-	BNv1_01G00484	+	Haem peroxidase, plant/fungal/bacterial	peroxidase 41-like [Cucumis sativus]
BN-HDR45	chr1	1166462	up2kb	1166467	up2kb	CsaV3_1G001800.1	+	U box domain	U-box domain-containing protein 38 [Cucumis sativus]	chr1	1224737	-	1224819	-	-	-		-
BN-HDR47	chr1	1186718	intron1	1186991	intron1	CsaV3_1G001820.1	+		-	chr1	1245019	intron1	1245303	intron1	BNv1_01G00487	+		-
BN-HDR47	chr1	1186718	intron	1186991	up2kb	CsaV3_1G001830.1	+	Aldehyde dehydrogenase domain	betaine aldehyde dehydrogenase 1, chloroplastic [Cucumis sativus]	chr1	1245019	-	1245303	-	-	-		-
BN-HDR48	chr1	1187935	intron1	1188219	intron1	CsaV3_1G001820.1	+		-	chr1	1246244	intron1	1246613	intron1	BNv1_01G00487	+		-
BN-HDR48	chr1	1187935	up2kb	1188219	up2kb	CsaV3_1G001830.1	+	Aldehyde dehydrogenase domain	betaine aldehyde dehydrogenase 1, chloroplastic [Cucumis sativus]	chr1	1246244	up2kb	1246613	up2kb	BNv1_01G00488	+	Aldehyde dehydrogenase domain	betaine aldehyde dehydrogenase 1, chloroplastic [Cucumis sativus]
BN-HDR49	chr1	1203345	up2kb	1203815	intron	CsaV3_1G001850.1	-	E2F/DP family, winged-helix DNA-binding domain	hypothetical protein POPTR_0015s08160g [Populus trichocarpa]	chr1	1261723	up2kb	1262180	-	BNv1_01G00490	-	E2F/DP family, winged-helix DNA-binding domain	hypothetical protein POPTR_0015s08160g [Populus trichocarpa]
BN-HDR52	chr1	1236654	down2kb	1236706	down2kb	CsaV3_1G001890.1	+	HEAT repeat	microtubule-associated protein TORTIFOLIA1 [Cucumis sativus]	chr1	1295062	down2kb	1295177	down2kb	BNv1_01G00494	+	HEAT repeat	microtubule-associated protein TORTIFOLIA1 [Cucumis sativus]
BN-HDR57	chr1	1251626	up2kb	1252182	up2kb	CsaV3_1G001910.1	+	SANT/Myb domain	transcription factor MYB1R1 [Cucumis sativus]	chr1	1310111	up2kb	1310693	up2kb	BNv1_01G00496	+	SANT/Myb domain	transcription factor MYB1R1 [Cucumis sativus]
BN-HDR59	chr1	1259844	up2kb	1260049	up2kb	CsaV3_1G001920.1	-	Protein kinase domain IPR017892	serine/threonine-protein kinase AtPK2/AtPK19 [Cucumis sativus]	chr1	1318299	up2kb	1318591	up2kb	BNv1_01G00497	-	Protein kinase domain IPR017892	serine/threonine-protein kinase AtPK2/AtPK19 [Cucumis sativus]
BN-HDR59	chr1	1259844	down2kb	1260049	down2kb	CsaV3_1G001930.1	-	Importin-beta, N-terminal domain IPR013598	Transportin-3 [Glycine soja]	chr1	1318299	down2kb	1318591	down2kb	BNv1_01G00498	-	Exportin-1/Importin-beta-like	Transportin-3 [Glycine soja]
BN-DEL60	chr1	1309103	intron5	1309156	intron5	CsaV3_1G002000.1	-	DDT domain IPR028942	uncharacterized protein LOC101216302 isoform X1 [Cucumis sativus]	chr1	1367632	intron5	1367633	intron5	BNv1_01G00507	-	DDT domain IPR028942	uncharacterized protein LOC101216302 isoform X1 [Cucumis sativus]
BN-INS61	chr1	1323425	up2kb	1323429	up2kb	CsaV3_1G002050.1	-	Nodulin-like IPR011701	hypothetical protein PRUPE_ppa003974mg [Prunus persica]	chr1	1381868	up2kb	1381987	up2kb	BNv1_01G00511	-	Nodulin-like IPR011701	hypothetical protein PRUPE_ppa003974mg [Prunus persica]
BN-CPL63	chr1	1326996	intron1	1327194	intron1	CsaV3_1G002060.1	+	Zinc finger, RING-type IPR008913	uncharacterized protein LOC101212459 [Cucumis sativus]	chr1	1385617	intron1	1385715	intron1	BNv1_01G00512	+	Zinc finger, RING-type IPR008913	uncharacterized protein LOC101212459 [Cucumis sativus]
BN-DUP4833	chr1	1334956	down2kb	1336846	intron	CsaV3_1G002060.1	+	Zinc finger, RING-type IPR008913	uncharacterized protein LOC101212459 [Cucumis sativus]	chr6	13972391	-	13974281	-	-	-		-
BN-DUP4833	chr1	1334956	intron14	1336846	intron14	CsaV3_1G002070.1	-	Peptidase C19, ubiquitin carboxyl-terminal hydrolase IPR006865	hypothetical protein PRUPE_ppa000140mg [Prunus persica]	chr6	13972391	-	13974281	-	-	-		-
BN-DUP4833	chr1	1334956	-	1336846	-	-	-		-	chr6	13972391	intron5	13974281	exon5	BNv1_06G18215	-	Reverse transcriptase domain IPR000719	hypothetical protein VITISV_029474 [Vitis vinifera]
BN-INS62	chr1	1324588	up2kb	1324592	up2kb	CsaV3_1G002060.1	+	Zinc finger, RING-type IPR008913	uncharacterized protein LOC101212459 [Cucumis sativus]	chr1	1383153	up2kb	1383207	up2kb	BNv1_01G00512	+	Zinc finger, RING-type IPR008913	uncharacterized protein LOC101212459 [Cucumis sativus]
BN-DUP4834	chr1	1336845	intron14	1337266	intron14	CsaV3_1G002070.1	-	Peptidase C19, ubiquitin carboxyl-terminal hydrolase IPR006865	hypothetical protein PRUPE_ppa000140mg [Prunus persica]	chr7	3802829	-	3803250	-	-	-		-
BN-DUP4834	chr1	1336845	-	1337266	-	-	-		-	chr7	3802829	intron7	3803250	intron7	BNv1_07G20914	+	C2 domain IPR002048	phosphatidylserine decarboxylase proenzyme 2-like isoform X1 [Cicer arietinum]
BN-HDR64	chr1	1340321	intron8	1340506	intron8	CsaV3_1G002070.1	-	Peptidase C19, ubiquitin carboxyl-terminal hydrolase IPR006865	hypothetical protein PRUPE_ppa000140mg [Prunus persica]	chr1	1396536	intron7	1396542	intron7	BNv1_01G00513	-	Peptidase C19, ubiquitin carboxyl-terminal hydrolase IPR006865	hypothetical protein PRUPE_ppa000140mg [Prunus persica]
BN-INS65	chr1	1351673	up2kb	1351675	up2kb	CsaV3_1G002090.1	+		-	chr1	1407664	up2kb	1407772	up2kb	BNv1_01G00515	+		-
BN-INS65	chr1	1351673	up2kb	1351675	up2kb	CsaV3_1G002080.1	-	Pentatricopeptide repeat	pentatricopeptide repeat-containing protein At1g18900 [Cucumis sativus]	chr1	1407664	-	1407772	-	-	-		-
BN-INS66	chr1	1354027	intron1	1354027	intron1	CsaV3_1G002090.1	+		-	chr1	1410102	intron1	1410293	intron1	BNv1_01G00515	+		-
BN-TDM68	chr1	1406637	up2kb	1406756	up2kb	CsaV3_1G002170.1	-		-	chr1	1462926	up2kb	1463011	up2kb	BNv1_01G00523	-		-
BN-TDM68	chr1	1406637	up2kb	1406756	up2kb	CsaV3_1G002180.1	+	WRKY domain	probable WRKY transcription factor 61 [Fragaria vesca subsp. vesca]	chr1	1462926	up2kb	1463011	up2kb	BNv1_01G00524	+	WRKY domain	probable WRKY transcription factor 61 [Fragaria vesca subsp. vesca]
BN-HDR69	chr1	1422874	up2kb	1422906	up2kb	CsaV3_1G002200.1	-	ABC transporter-like	ABC transporter A family member 2 [Cucumis sativus]	chr1	1479142	up2kb	1479248	up2kb	BNv1_01G00526	-	ABC transporter-like	ABC transporter A family member 2 [Cucumis sativus]
BN-CPG71	chr1	1525077	up2kb	1525122	up2kb	CsaV3_1G002400.1	-		uncharacterized protein LOC101222461 [Cucumis sativus]	chr1	1581462	up2kb	1581554	up2kb	BNv1_01G00547	-		uncharacterized protein LOC101222461 [Cucumis sativus]
BN-CPG71	chr1	1525077	down2kb	1525122	down2kb	CsaV3_1G002410.1	-	Chlorophyll A-B binding protein	chlorophyll a-b binding protein P4, chloroplastic [Cucumis sativus]	chr1	1581462	down2kb	1581554	down2kb	BNv1_01G00548	-	Chlorophyll A-B binding protein	chlorophyll a-b binding protein P4, chloroplastic [Cucumis sativus]
BN-HDR72	chr1	1639185	up2kb	1639215	up2kb	CsaV3_1G002610.1	-	HNH endonuclease	uncharacterized protein LOC101204599 isoform X2 [Cucumis sativus]	chr1	1695650	up2kb	1697751	-	BNv1_01G00569	-	HNH endonuclease	uncharacterized protein LOC101204599 isoform X2 [Cucumis sativus]
BN-HDR73	chr1	1643851	intron4	1644063	down2kb	CsaV3_1G002620.1	+		mitochondrial import inner membrane translocase subunit tim16-like [Cucumis sativus]	chr1	1702397	down2kb	1702576	down2kb	BNv1_01G00570	+		mitochondrial import inner membrane translocase subunit tim16-like [Cucumis sativus]
BN-HDR73	chr1	1643851	up2kb	1644063	up2kb	CsaV3_1G002630.1	+		Uncharacterized protein TCM_014120 [Theobroma cacao]	chr1	1702397	up2kb	1702576	up2kb	BNv1_01G00571	+		Uncharacterized protein TCM_014120 [Theobroma cacao]
BN-DEL75	chr1	1712271	down2kb	1712548	down2kb	CsaV3_1G002710.1	+	Glycoside hydrolase, family 79	hypothetical protein POPTR_0015s03440g [Populus trichocarpa]	chr1	1770787	down2kb	1770790	down2kb	BNv1_01G00580	+	Glycoside hydrolase, family 79	heparanase-like protein 1 [Cucumis sativus]
BN-CPL77	chr1	1765104	intron18	1765298	intron18	CsaV3_1G002800.1	-	Helicase, C-terminal IPR007502	putative pre-mRNA-splicing factor ATP-dependent RNA helicase DHX16 [Cucumis sativus]	chr1	1823389	intron16	1823394	intron16	BNv1_01G00590	-	Helicase, C-terminal IPR007502	putative pre-mRNA-splicing factor ATP-dependent RNA helicase DHX16 [Cucumis sativus]
BN-CPG78	chr1	1882122	down2kb	1882188	down2kb	CsaV3_1G002990.1	+	Transcription factor, TCP	Teosinte branched 1, putative [Theobroma cacao]	chr1	1940207	down2kb	1940344	down2kb	BNv1_01G00610	+	Transcription factor, TCP	Teosinte branched 1, putative [Theobroma cacao]
BN-HDR79	chr1	1958270	intron7	1958401	intron7	CsaV3_1G003150.1	-	B3/B4 tRNA-binding domain IPR005147	probable phenylalanine--tRNA ligase beta subunit isoform X1 [Cucumis sativus]	chr1	2016425	intron18	2016426	intron18	BNv1_01G00623	-	B3/B4 tRNA-binding domain IPR005147	probable phenylalanine--tRNA ligase beta subunit isoform X1 [Cucumis sativus]
BN-HDR80	chr1	1961294	up2kb	1961508	up2kb	CsaV3_1G003150.1	-	B3/B4 tRNA-binding domain IPR005147	probable phenylalanine--tRNA ligase beta subunit isoform X1 [Cucumis sativus]	chr1	2019291	intron11	2019457	intron11	BNv1_01G00623	-	B3/B4 tRNA-binding domain IPR005147	probable phenylalanine--tRNA ligase beta subunit isoform X1 [Cucumis sativus]
BN-HDR80	chr1	1961294	down2kb	1961508	down2kb	CsaV3_1G003160.1	-	Phosphoribulokinase/uridine kinase IPR023577	uridine-cytidine kinase C isoform X1 [Cucumis sativus]	chr1	2019291	intron11	2019457	intron11	BNv1_01G00623	-	B3/B4 tRNA-binding domain IPR005147	probable phenylalanine--tRNA ligase beta subunit isoform X1 [Cucumis sativus]
BN-CPL83	chr1	2000263	intron9	2000374	intron9	CsaV3_1G003220.1	+	Peptidase S49	serine protease SPPA, chloroplastic isoform X1 [Cucumis sativus]	chr1	2056858	intron9	2056913	intron9	BNv1_01G00629	+	Peptidase S49	serine protease SPPA, chloroplastic isoform X1 [Cucumis sativus]
BN-DUP4836	chr1	1999250	intron8	1999506	intron8	CsaV3_1G003220.1	+	Peptidase S49	serine protease SPPA, chloroplastic isoform X1 [Cucumis sativus]	chr5	24941252	-	24941506	-	-	-		-
BN-HDR82	chr1	1990575	up2kb	1990755	up2kb	CsaV3_1G003220.1	+	Peptidase S49	serine protease SPPA, chloroplastic isoform X1 [Cucumis sativus]	chr1	2048573	up2kb	2048739	up2kb	BNv1_01G00629	+	Peptidase S49	serine protease SPPA, chloroplastic isoform X1 [Cucumis sativus]
BN-TRANS4835	chr1	1998085	intron8	1999506	intron8	CsaV3_1G003220.1	+	Peptidase S49	serine protease SPPA, chloroplastic isoform X1 [Cucumis sativus]	chr2	24924259	-	24925658	-	-	-		-
BN-TRANS4835	chr1	1998085	-	1999506	-	-	-		-	chr2	24924259	up2kb	24925658	-	BNv1_02G05457	-	Fatty acid desaturase, type 2	stearoyl-acyl carrier protein desaturase
BN-HDR84	chr1	2024268	up2kb	2024878	up2kb	CsaV3_1G003260.1	+		-	chr1	2080776	up2kb	2081130	up2kb	BNv1_01G00633	+		-
BN-HDR84	chr1	2024268	intron	2024878	up2kb	CsaV3_1G003270.1	+	Myc-type, basic helix-loop-helix (bHLH) domain	hypothetical protein POPTR_0015s03550g [Populus trichocarpa]	chr1	2080776	-	2081130	up2kb	BNv1_01G00634	+	Myc-type, basic helix-loop-helix (bHLH) domain	hypothetical protein POPTR_0015s03550g [Populus trichocarpa]
BN-HDR85	chr1	2042768	down2kb	2042989	down2kb	CsaV3_1G003290.1	+		-	chr1	2098956	down2kb	2099124	down2kb	BNv1_01G00636	+		-
BN-HDR86	chr1	2058138	exon2	2058254	exon2	CsaV3_1G003310.1	+	Sterile alpha motif domain	uncharacterized protein LOC101220579 [Cucumis sativus]	chr1	2114289	down2kb	2114396	down2kb	BNv1_01G00638	+	Sterile alpha motif domain	uncharacterized protein LOC101220579 [Cucumis sativus]
BN-HDR87	chr1	2059968	down2kb	2060289	down2kb	CsaV3_1G003310.1	+	Sterile alpha motif domain	uncharacterized protein LOC101220579 [Cucumis sativus]	chr1	2116110	-	2116424	-	-	-		-
BN-CPG89	chr1	2172562	down2kb	2172600	down2kb	CsaV3_1G003480.1	+	EF-hand domain	probable calcium-binding protein CML15 [Cucumis sativus]	chr1	2228769	down2kb	2228843	down2kb	BNv1_01G00656	+	EF-hand domain	probable calcium-binding protein CML15 [Cucumis sativus]
BN-CPG89	chr1	2172562	down2kb	2172600	down2kb	CsaV3_1G003490.1	-	SWAP/Surp IPR011666	G patch domain-containing protein TGH isoform X1 [Cucumis sativus]	chr1	2228769	down2kb	2228843	down2kb	BNv1_01G00657	-	SWAP/Surp IPR011666	G patch domain-containing protein TGH isoform X1 [Cucumis sativus]
BN-DEL90	chr1	2176835	intron13	2176905	intron13	CsaV3_1G003490.1	-	SWAP/Surp IPR011666	G patch domain-containing protein TGH isoform X1 [Cucumis sativus]	chr1	2233072	intron12	2233076	intron12	BNv1_01G00657	-	SWAP/Surp IPR011666	G patch domain-containing protein TGH isoform X1 [Cucumis sativus]
BN-HDR91	chr1	2201830	up2kb	2202088	up2kb	CsaV3_1G003540.1	+	Plant disease resistance response protein	dirigent protein 22 [Cucumis sativus]	chr1	2258084	up2kb	2258266	up2kb	BNv1_01G00661	+	Plant disease resistance response protein	dirigent protein 22 [Cucumis sativus]
BN-CPG93	chr1	2220133	exon1	2220162	up2kb	CsaV3_1G003570.1	-	Oleosin	oleosin 1 [Cucumis sativus]	chr1	2276285	up2kb	2276350	up2kb	BNv1_01G00664	-	Oleosin	oleosin 1 [Cucumis sativus]
BN-CPG93	chr1	2220133	down2kb	2220162	down2kb	CsaV3_1G003560.1	+	Initiation factor 2B-related	translation initiation factor eIF-2B subunit delta [Fragaria vesca subsp. vesca]	chr1	2276285	-	2276350	-	-	-		-
BN-HDR94	chr1	2257734	up2kb	2257750	up2kb	CsaV3_1G003630.1	+	DNA mismatch repair protein MutS, C-terminal IPR007695	hypothetical protein PRUPE_ppa000981mg [Prunus persica]	chr1	2313973	up2kb	2314050	up2kb	BNv1_01G00668	+	DNA mismatch repair protein MutS, C-terminal IPR007695	hypothetical protein PRUPE_ppa000981mg [Prunus persica]
BN-HDR94	chr1	2257734	up2kb	2257750	up2kb	CsaV3_1G003620.1	-		-	chr1	2313973	-	2314050	-	-	-		-
BN-HDR95	chr1	2265654	down2kb	2265767	down2kb	CsaV3_1G003630.1	+	DNA mismatch repair protein MutS, C-terminal IPR007695	hypothetical protein PRUPE_ppa000981mg [Prunus persica]	chr1	2321937	down2kb	2322004	down2kb	BNv1_01G00668	+	DNA mismatch repair protein MutS, C-terminal IPR007695	hypothetical protein PRUPE_ppa000981mg [Prunus persica]
BN-DEL97	chr1	2277517	intron10	2277666	intron10	CsaV3_1G003640.1	+	Transmembrane Fragile-X-F-associated protein	hypothetical protein PRUPE_ppa005259mg [Prunus persica]	chr1	2333817	intron10	2333821	intron10	BNv1_01G00669	+	Transmembrane Fragile-X-F-associated protein	hypothetical protein PRUPE_ppa005259mg [Prunus persica]
BN-HDR96	chr1	2270880	up2kb	2270914	up2kb	CsaV3_1G003640.1	+	Transmembrane Fragile-X-F-associated protein	hypothetical protein PRUPE_ppa005259mg [Prunus persica]	chr1	2327172	up2kb	2327258	up2kb	BNv1_01G00669	+	Transmembrane Fragile-X-F-associated protein	hypothetical protein PRUPE_ppa005259mg [Prunus persica]
BN-HDR99	chr1	2280411	down2kb	2280495	down2kb	CsaV3_1G003640.1	+	Transmembrane Fragile-X-F-associated protein	hypothetical protein PRUPE_ppa005259mg [Prunus persica]	chr1	2336615	down2kb	2336636	down2kb	BNv1_01G00669	+	Transmembrane Fragile-X-F-associated protein	hypothetical protein PRUPE_ppa005259mg [Prunus persica]
BN-HDR99	chr1	2280411	up2kb	2280495	up2kb	CsaV3_1G003650.1	+		Uncharacterized protein isoform 1 [Theobroma cacao]	chr1	2336615	up2kb	2336636	up2kb	BNv1_01G00670	+		Uncharacterized protein isoform 1 [Theobroma cacao]
BN-INS98	chr1	2278219	intron10	2278219	intron10	CsaV3_1G003640.1	+	Transmembrane Fragile-X-F-associated protein	hypothetical protein PRUPE_ppa005259mg [Prunus persica]	chr1	2334370	intron10	2334424	intron10	BNv1_01G00669	+	Transmembrane Fragile-X-F-associated protein	hypothetical protein PRUPE_ppa005259mg [Prunus persica]
BN-INS100	chr1	2289090	down2kb	2289090	down2kb	CsaV3_1G003650.1	+		Uncharacterized protein isoform 1 [Theobroma cacao]	chr1	2345237	down2kb	2345287	down2kb	BNv1_01G00670	+		Uncharacterized protein isoform 1 [Theobroma cacao]
BN-INS100	chr1	2289090	down2kb	2289090	down2kb	CsaV3_1G003660.1	-	Ribosomal protein S28e	30S ribosomal protein S28e [Medicago truncatula]	chr1	2345237	down2kb	2345287	down2kb	BNv1_01G00671	-	Ribosomal protein S28e	30S ribosomal protein S28e [Medicago truncatula]
BN-HDR103	chr1	2294675	up2kb	2294797	up2kb	CsaV3_1G003660.1	-	Ribosomal protein S28e	30S ribosomal protein S28e [Medicago truncatula]	chr1	2351074	up2kb	2351213	-	BNv1_01G00671	-	Ribosomal protein S28e	30S ribosomal protein S28e [Medicago truncatula]
BN-HDR103	chr1	2294675	up2kb	2294797	up2kb	CsaV3_1G003670.1	+	SANT/Myb domain	transcription factor DIVARICATA [Cucumis sativus]	chr1	2351074	up2kb	2351213	up2kb	BNv1_01G00672	+	SANT/Myb domain	transcription factor DIVARICATA [Cucumis sativus]
BN-INS101	chr1	2289935	intron1	2289936	intron1	CsaV3_1G003660.1	-	Ribosomal protein S28e	30S ribosomal protein S28e [Medicago truncatula]	chr1	2346134	intron1	2346196	intron1	BNv1_01G00671	-	Ribosomal protein S28e	30S ribosomal protein S28e [Medicago truncatula]
BN-INS102	chr1	2293703	up2kb	2293703	up2kb	CsaV3_1G003660.1	-	Ribosomal protein S28e	30S ribosomal protein S28e [Medicago truncatula]	chr1	2349980	up2kb	2350087	up2kb	BNv1_01G00671	-	Ribosomal protein S28e	30S ribosomal protein S28e [Medicago truncatula]
BN-HDR104	chr1	2301059	up2kb	2301553	up2kb	CsaV3_1G003680.1	-		uncharacterized protein LOC101217575 [Cucumis sativus]	chr1	2357505	up2kb	2358082	up2kb	BNv1_01G00673	-		uncharacterized protein LOC101217575 [Cucumis sativus]
BN-HDR104	chr1	2301059	down2kb	2301553	down2kb	CsaV3_1G003690.1	-	Endonuclease/exonuclease/phosphatase	carbon catabolite repressor protein 4 homolog 3 isoform X2 [Cucumis sativus]	chr1	2357505	down2kb	2358082	down2kb	BNv1_01G00674	-	Endonuclease/exonuclease/phosphatase	carbon catabolite repressor protein 4 homolog 3 isoform X2 [Cucumis sativus]
BN-HDR105	chr1	2306210	up2kb	2306474	up2kb	CsaV3_1G003690.1	-	Endonuclease/exonuclease/phosphatase	carbon catabolite repressor protein 4 homolog 3 isoform X2 [Cucumis sativus]	chr1	2362749	up2kb	2362909	up2kb	BNv1_01G00674	-	Endonuclease/exonuclease/phosphatase	carbon catabolite repressor protein 4 homolog 3 isoform X2 [Cucumis sativus]
BN-HDR105	chr1	2306210	down2kb	2306474	down2kb	CsaV3_1G003700.1	-	Actin family	actin-related protein 4 [Cucumis sativus]	chr1	2362749	down2kb	2362909	down2kb	BNv1_01G00675	-	Actin family	actin-related protein 4 [Cucumis sativus]
BN-HDR106	chr1	2315590	up2kb	2315775	up2kb	CsaV3_1G003700.1	-	Actin family	actin-related protein 4 [Cucumis sativus]	chr1	2371994	up2kb	2372194	up2kb	BNv1_01G00675	-	Actin family	actin-related protein 4 [Cucumis sativus]
BN-HDR106	chr1	2315590	-	2315775	-	-	-		-	chr1	2371994	up2kb	2372194	up2kb	BNv1_01G00676	+	Xylanase inhibitor, C-terminal IPR032861	Aspartic proteinase nepenthesin-1 [Cucumis sativus]
BN-HDR107	chr1	2320029	down2kb	2320091	down2kb	CsaV3_1G003710.1	+	Xylanase inhibitor, C-terminal IPR032861	Aspartic proteinase nepenthesin-1 [Cucumis sativus]	chr1	2376478	down2kb	2376484	down2kb	BNv1_01G00676	+	Xylanase inhibitor, C-terminal IPR032861	Aspartic proteinase nepenthesin-1 [Cucumis sativus]
BN-HDR109	chr1	2323435	up2kb	2323528	up2kb	CsaV3_1G003720.1	+	Xylanase inhibitor, C-terminal IPR032861	Aspartic proteinase nepenthesin-1 [Cucumis sativus]	chr1	2379944	up2kb	2379995	up2kb	BNv1_01G00677	+	Xylanase inhibitor, C-terminal IPR032861	Aspartic proteinase nepenthesin-1 [Cucumis sativus]
BN-DEL110	chr1	2337986	intron2	2338074	intron2	CsaV3_1G003750.1	-		uncharacterized protein LOC101218989 [Cucumis sativus]	chr1	2394466	down2kb	2394467	down2kb	BNv1_01G00681	-		uncharacterized protein LOC101218989 [Cucumis sativus]
BN-DEL110	chr1	2337986	up2kb	2338074	up2kb	CsaV3_1G003760.1	+	Bifunctional inhibitor/plant lipid transfer protein/seed storage helical domain	hypothetical protein PRUPE_ppa025857mg, partial [Prunus persica]	chr1	2394466	up2kb	2394467	up2kb	BNv1_01G00680	+	Bifunctional inhibitor/plant lipid transfer protein/seed storage helical domain	hypothetical protein PRUPE_ppa025857mg, partial [Prunus persica]
BN-HDR113	chr1	2374919	up2kb	2374984	up2kb	CsaV3_1G003820.1	-		uncharacterized protein LOC101219468 [Cucumis sativus]	chr1	2432025	up2kb	2432027	up2kb	BNv1_01G00686	-		uncharacterized protein LOC101219468 [Cucumis sativus]
BN-NOTAL4	chr1	2383159	up2kb	2383934	intron	CsaV3_1G003830.1	-	Protein of unknown function DUF1666	uncharacterized protein LOC101203868 [Cucumis sativus]	-	-	-	-	-	-	-		-
BN-INS114	chr1	2405817	up2kb	2405817	up2kb	CsaV3_1G003870.1	-	C2 domain	uncharacterized protein LOC101204113 [Cucumis sativus]	chr1	2462300	up2kb	2462362	up2kb	BNv1_01G00689	-	C2 domain IPR001890	uncharacterized protein LOC101204113 [Cucumis sativus]
BN-INS114	chr1	2405817	up2kb	2405817	up2kb	CsaV3_1G003880.1	+	DnaJ domain IPR008889	chaperone protein dnaJ 49 [Cucumis sativus]	chr1	2462300	up2kb	2462362	up2kb	BNv1_01G00690	+	VQ	VQ motif-containing protein, putative [Theobroma cacao]
BN-DUP4839	chr1	2409454	exon2	2410103	down2kb	CsaV3_1G003880.1	+	DnaJ domain IPR008889	chaperone protein dnaJ 49 [Cucumis sativus]	chr4	32995505	exon1	32996150	intron2	BNv1_04G13568	+	Domain of unknown function DUF1977, DnaJ-like	hypothetical protein PHAVU_001G207400g [Phaseolus vulgaris]
BN-DUP4840	chr1	2409454	exon2	2410103	down2kb	CsaV3_1G003880.1	+	DnaJ domain IPR008889	chaperone protein dnaJ 49 [Cucumis sativus]	chr4	33239195	-	33239837	-	-	-		-
BN-DUP4841	chr1	2409454	exon2	2410103	down2kb	CsaV3_1G003880.1	+	DnaJ domain IPR008889	chaperone protein dnaJ 49 [Cucumis sativus]	chr7	8083400	up2kb	8084044	intron1	BNv1_07G21254	+	Domain of unknown function DUF1977, DnaJ-like IPR016040	UDP-glucuronic acid decarboxylase 2-like [Fragaria vesca subsp. vesca]
BN-DUP4842	chr1	2409477	exon2	2410103	down2kb	CsaV3_1G003880.1	+	DnaJ domain IPR008889	chaperone protein dnaJ 49 [Cucumis sativus]	chr4	31811629	-	31812254	-	-	-		-
BN-DUP4842	chr1	2409477	-	2410103	-	-	-		-	chr4	31811629	intron1	31812254	intron1	BNv1_04G13562	+		phylloplanin [Vitis vinifera]
BN-DUP4848	chr1	2410202	down2kb	2411174	down2kb	CsaV3_1G003880.1	+	DnaJ domain IPR008889	chaperone protein dnaJ 49 [Cucumis sativus]	chr4	31739435	-	31740396	-	-	-		-
BN-DUP4848	chr1	2410202	intron	2411174	down2kb	CsaV3_1G003890.1	-	Protein of unknown function DUF639	uncharacterized protein LOC101213898 [Cucumis sativus]	chr4	31739435	-	31740396	-	-	-		-
BN-DUP4848	chr1	2410202	-	2411174	-	-	-		-	chr4	31739435	intron1	31740396	intron1	BNv1_04G13562	+		phylloplanin [Vitis vinifera]
BN-DUP4849	chr1	2410202	down2kb	2411174	down2kb	CsaV3_1G003880.1	+	DnaJ domain IPR008889	chaperone protein dnaJ 49 [Cucumis sativus]	chr4	31822641	-	31823609	-	-	-		-
BN-DUP4849	chr1	2410202	intron	2411174	down2kb	CsaV3_1G003890.1	-	Protein of unknown function DUF639	uncharacterized protein LOC101213898 [Cucumis sativus]	chr4	31822641	-	31823609	-	-	-		-
BN-DUP4850	chr1	2410202	down2kb	2411174	down2kb	CsaV3_1G003880.1	+	DnaJ domain IPR008889	chaperone protein dnaJ 49 [Cucumis sativus]	chr4	33005224	-	33006195	-	-	-		-
BN-DUP4850	chr1	2410202	intron	2411174	down2kb	CsaV3_1G003890.1	-	Protein of unknown function DUF639	uncharacterized protein LOC101213898 [Cucumis sativus]	chr4	33005224	-	33006195	-	-	-		-
BN-DUP4850	chr1	2410202	-	2411174	-	-	-		-	chr4	33005224	intron12	33006195	exon15	BNv1_04G13569	+	Condensin complex subunit 1, C-terminal	hypothetical protein PRUPE_ppa000283mg [Prunus persica]
BN-DUP4851	chr1	2410202	down2kb	2411174	down2kb	CsaV3_1G003880.1	+	DnaJ domain IPR008889	chaperone protein dnaJ 49 [Cucumis sativus]	chr4	33248857	-	33249824	-	-	-		-
BN-DUP4851	chr1	2410202	intron	2411174	down2kb	CsaV3_1G003890.1	-	Protein of unknown function DUF639	uncharacterized protein LOC101213898 [Cucumis sativus]	chr4	33248857	-	33249824	-	-	-		-
BN-DUP4852	chr1	2410202	down2kb	2411174	down2kb	CsaV3_1G003880.1	+	DnaJ domain IPR008889	chaperone protein dnaJ 49 [Cucumis sativus]	chr6	16995247	-	16996217	-	-	-		-
BN-DUP4852	chr1	2410202	intron	2411174	down2kb	CsaV3_1G003890.1	-	Protein of unknown function DUF639	uncharacterized protein LOC101213898 [Cucumis sativus]	chr6	16995247	-	16996217	-	-	-		-
BN-DUP4852	chr1	2410202	-	2411174	-	-	-		-	chr6	16995247	intron19	16996217	exon22	BNv1_06G18414	+	Crotonase superfamily IPR006108	hypothetical protein PRUPE_ppa000283mg [Prunus persica]
BN-DUP4853	chr1	2410202	down2kb	2411174	down2kb	CsaV3_1G003880.1	+	DnaJ domain IPR008889	chaperone protein dnaJ 49 [Cucumis sativus]	chr6	17071369	-	17072328	-	-	-		-
BN-DUP4853	chr1	2410202	intron	2411174	down2kb	CsaV3_1G003890.1	-	Protein of unknown function DUF639	uncharacterized protein LOC101213898 [Cucumis sativus]	chr6	17071369	-	17072328	-	-	-		-
BN-DUP4853	chr1	2410202	-	2411174	-	-	-		-	chr6	17071369	intron3	17072328	intron6	BNv1_06G18415	+		Condensin-2 complex subunit D3 isoform 1 [Theobroma cacao]
BN-DUP4854	chr1	2410202	down2kb	2411174	down2kb	CsaV3_1G003880.1	+	DnaJ domain IPR008889	chaperone protein dnaJ 49 [Cucumis sativus]	chr6	18105893	-	18106860	-	-	-		-
BN-DUP4854	chr1	2410202	intron	2411174	down2kb	CsaV3_1G003890.1	-	Protein of unknown function DUF639	uncharacterized protein LOC101213898 [Cucumis sativus]	chr6	18105893	-	18106860	-	-	-		-
BN-DUP4854	chr1	2410202	-	2411174	-	-	-		-	chr6	18105893	intron7	18106860	exon10	BNv1_06G18430	+	Condensin complex subunit 1, C-terminal	hypothetical protein PRUPE_ppa000283mg [Prunus persica]
BN-DUP4855	chr1	2410202	down2kb	2411174	down2kb	CsaV3_1G003880.1	+	DnaJ domain IPR008889	chaperone protein dnaJ 49 [Cucumis sativus]	chr7	8093092	-	8094057	-	-	-		-
BN-DUP4855	chr1	2410202	intron	2411174	down2kb	CsaV3_1G003890.1	-	Protein of unknown function DUF639	uncharacterized protein LOC101213898 [Cucumis sativus]	chr7	8093092	-	8094057	-	-	-		-
BN-INVDP4843	chr1	2409878	exon2	2411174	down2kb	CsaV3_1G003880.1	+	DnaJ domain IPR008889	chaperone protein dnaJ 49 [Cucumis sativus]	chr4	31936138	-	31937423	-	-	-		-
BN-INVDP4843	chr1	2409878	intron	2411174	down2kb	CsaV3_1G003890.1	-	Protein of unknown function DUF639	uncharacterized protein LOC101213898 [Cucumis sativus]	chr4	31936138	-	31937423	-	-	-		-
BN-INVDP4844	chr1	2409878	exon2	2411174	down2kb	CsaV3_1G003880.1	+	DnaJ domain IPR008889	chaperone protein dnaJ 49 [Cucumis sativus]	chr4	32219926	-	32221217	-	-	-		-
BN-INVDP4844	chr1	2409878	intron	2411174	down2kb	CsaV3_1G003890.1	-	Protein of unknown function DUF639	uncharacterized protein LOC101213898 [Cucumis sativus]	chr4	32219926	-	32221217	-	-	-		-
BN-INVDP4845	chr1	2409948	down2kb	2410180	down2kb	CsaV3_1G003880.1	+	DnaJ domain IPR008889	chaperone protein dnaJ 49 [Cucumis sativus]	chr4	32218531	-	32218763	-	-	-		-
BN-INVDP4846	chr1	2409962	down2kb	2411174	down2kb	CsaV3_1G003880.1	+	DnaJ domain IPR008889	chaperone protein dnaJ 49 [Cucumis sativus]	chr4	32049084	-	32050295	-	-	-		-
BN-INVDP4846	chr1	2409962	intron	2411174	down2kb	CsaV3_1G003890.1	-	Protein of unknown function DUF639	uncharacterized protein LOC101213898 [Cucumis sativus]	chr4	32049084	-	32050295	-	-	-		-
BN-INVDP4847	chr1	2409962	down2kb	2411174	down2kb	CsaV3_1G003880.1	+	DnaJ domain IPR008889	chaperone protein dnaJ 49 [Cucumis sativus]	chr4	32115063	-	32116268	-	-	-		-
BN-INVDP4847	chr1	2409962	intron	2411174	down2kb	CsaV3_1G003890.1	-	Protein of unknown function DUF639	uncharacterized protein LOC101213898 [Cucumis sativus]	chr4	32115063	-	32116268	-	-	-		-
BN-INVTR4856	chr1	2411180	down2kb	2411948	intron	CsaV3_1G003880.1	+	DnaJ domain IPR008889	chaperone protein dnaJ 49 [Cucumis sativus]	chr6	18043978	-	18044747	-	-	-		-
BN-INVTR4856	chr1	2411180	down2kb	2411948	down2kb	CsaV3_1G003890.1	-	Protein of unknown function DUF639	uncharacterized protein LOC101213898 [Cucumis sativus]	chr6	18043978	-	18044747	-	-	-		-
BN-INVTR4856	chr1	2411180	-	2411948	-	-	-		-	chr6	18043978	exon6	18044747	exon8	BNv1_06G18429	+	Crotonase superfamily IPR006176	condensin-2 complex subunit D3 [Cicer arietinum]
BN-HDR116	chr1	2424817	exon1	2424868	up2kb	CsaV3_1G003910.1	-	Myc-type, basic helix-loop-helix (bHLH) domain	transcription factor BEE 3-like [Cucumis sativus]	chr1	2480676	up2kb	2480676	up2kb	BNv1_01G00693	-	Myc-type, basic helix-loop-helix (bHLH) domain	transcription factor BEE 3-like [Cucumis sativus]
BN-INS115	chr1	2421871	down2kb	2421871	down2kb	CsaV3_1G003910.1	-	Myc-type, basic helix-loop-helix (bHLH) domain	transcription factor BEE 3-like [Cucumis sativus]	chr1	2477654	down2kb	2477714	down2kb	BNv1_01G00693	-	Myc-type, basic helix-loop-helix (bHLH) domain	transcription factor BEE 3-like [Cucumis sativus]
BN-HDR117	chr1	2449302	down2kb	2449362	down2kb	CsaV3_1G003950.1	+		uncharacterized protein LOC100790825 [Glycine max]	chr1	2505131	down2kb	2505131	down2kb	BNv1_01G00697	+		uncharacterized protein LOC100790825 [Glycine max]
BN-HDR118	chr1	2454183	down2kb	2454617	exon14	CsaV3_1G003960.1	-	Zinc finger, RING-type IPR008913	uncharacterized protein LOC101215023 [Cucumis sativus]	chr1	2509953	down2kb	2510315	down2kb	BNv1_01G00699	-	Zinc finger, RING-type IPR008913	uncharacterized protein LOC101215023 [Cucumis sativus]
BN-HDR118	chr1	2454183	-	2454617	-	-	-		-	chr1	2509953	up2kb	2510315	-	BNv1_01G00698	-	Protein of unknown function DUF1639	uncharacterized protein LOC101214785 [Cucumis sativus]
BN-HDR121	chr1	2478080	up2kb	2478337	up2kb	CsaV3_1G003970.1	+	Glycosyl transferase, family 14	hypothetical protein Csa_1G024220 [Cucumis sativus]	chr1	2540785	-	2541046	up2kb	BNv1_01G00700	+	Glycosyl transferase, family 14	hypothetical protein Csa_1G024220 [Cucumis sativus]
BN-HDR122	chr1	2505979	up2kb	2506044	up2kb	CsaV3_1G004010.1	-	Mandelate racemase/muconate lactonizing enzyme, N-terminal domain IPR029065	L-Ala-D/L-amino acid epimerase [Cucumis sativus]	chr1	2568715	up2kb	2569553	-	BNv1_01G00704	-	Mandelate racemase/muconate lactonizing enzyme, N-terminal domain IPR029065	L-Ala-D/L-amino acid epimerase [Cucumis sativus]
BN-HDR122	chr1	2505979	up2kb	2506044	up2kb	CsaV3_1G004020.1	+	Ribosomal protein S24/S35, mitochondrial, conserved domain	uncharacterized protein LOC101215739 [Cucumis sativus]	chr1	2568715	up2kb	2569553	up2kb	BNv1_01G00705	+	Ribosomal protein S24/S35, mitochondrial, conserved domain	uncharacterized protein LOC101215739 [Cucumis sativus]
BN-HDR123	chr1	2510869	exon4	2511281	down2kb	CsaV3_1G004020.1	+	Ribosomal protein S24/S35, mitochondrial, conserved domain	uncharacterized protein LOC101215739 [Cucumis sativus]	chr1	2574379	down2kb	2574746	down2kb	BNv1_01G00705	+	Ribosomal protein S24/S35, mitochondrial, conserved domain	uncharacterized protein LOC101215739 [Cucumis sativus]
BN-HDR123	chr1	2510869	down2kb	2511281	down2kb	CsaV3_1G004030.1	-	PB1 domain	uncharacterized protein LOC101210340 [Cucumis sativus]	chr1	2574379	-	2574746	down2kb	BNv1_01G00706	-	PB1 domain	uncharacterized protein LOC101210340 [Cucumis sativus]
BN-HDR124	chr1	2523984	up2kb	2524714	up2kb	CsaV3_1G004040.1	+	Stress up-regulated Nod 19	uncharacterized protein LOC101215981 [Cucumis sativus]	chr1	2587499	-	2587507	-	-	-		-
BN-HDR125	chr1	2525843	intron1	2526047	intron1	CsaV3_1G004040.1	+	Stress up-regulated Nod 19	uncharacterized protein LOC101215981 [Cucumis sativus]	chr1	2588645	up2kb	2588952	up2kb	BNv1_01G00707	+	Stress up-regulated Nod 19	uncharacterized protein LOC101215981 [Cucumis sativus]
BN-HDR126	chr1	2529945	down2kb	2529945	down2kb	CsaV3_1G004040.1	+	Stress up-regulated Nod 19	uncharacterized protein LOC101215981 [Cucumis sativus]	chr1	2592833	down2kb	2593268	down2kb	BNv1_01G00707	+	Stress up-regulated Nod 19	uncharacterized protein LOC101215981 [Cucumis sativus]
BN-HDR126	chr1	2529945	-	2529945	-	-	-		-	chr1	2592833	down2kb	2593268	down2kb	BNv1_01G00708	-		hypothetical protein VITISV_022975 [Vitis vinifera]
BN-HDR127	chr1	2531183	up2kb	2531231	up2kb	CsaV3_1G004050.1	+	Stress up-regulated Nod 19	uncharacterized protein LOC101215981 [Cucumis sativus]	chr1	2594497	up2kb	2595227	up2kb	BNv1_01G00709	+	Stress up-regulated Nod 19	uncharacterized protein LOC101215981 [Cucumis sativus]
BN-HDR127	chr1	2531183	-	2531231	-	-	-		-	chr1	2594497	down2kb	2595227	up2kb	BNv1_01G00708	-		hypothetical protein VITISV_022975 [Vitis vinifera]
BN-HDR128	chr1	2538649	up2kb	2538756	up2kb	CsaV3_1G004060.1	-	Stress up-regulated Nod 19	uncharacterized protein LOC101215981 [Cucumis sativus]	chr1	2602640	up2kb	2602749	-	BNv1_01G00710	-	Stress up-regulated Nod 19	uncharacterized protein LOC101215981 [Cucumis sativus]
BN-HDR131	chr1	2567255	down2kb	2567494	down2kb	CsaV3_1G004090.1	+	EamA domain	WAT1-related protein At3g18200 [Cucumis sativus]	chr1	2631453	down2kb	2631688	down2kb	BNv1_01G00713	+	EamA domain	WAT1-related protein At3g18200 [Cucumis sativus]
BN-HDR131	chr1	2567255	up2kb	2567494	up2kb	CsaV3_1G004100.1	+	Helicase, C-terminal IPR007502	DEA(D/H)-box RNA helicase family protein isoform 1 [Theobroma cacao]	chr1	2631453	-	2631688	up2kb	BNv1_01G00714	+	Helicase, C-terminal IPR007502	DEA(D/H)-box RNA helicase family protein isoform 1 [Theobroma cacao]
BN-HDR132	chr1	2592015	down2kb	2592104	down2kb	CsaV3_1G004130.1	+	Peroxin-3	peroxisome biogenesis protein 3-2 [Cucumis sativus]	chr1	2656171	down2kb	2656388	down2kb	BNv1_01G00717	+	Peroxin-3	peroxisome biogenesis protein 3-2 [Cucumis sativus]
BN-HDR132	chr1	2592015	up2kb	2592104	up2kb	CsaV3_1G004140.1	+		uncharacterized protein LOC101217184 [Cucumis sativus]	chr1	2656171	up2kb	2656388	up2kb	BNv1_01G00718	+		uncharacterized protein LOC101217184 [Cucumis sativus]
BN-HDR133	chr1	2609427	up2kb	2609585	up2kb	CsaV3_1G004180.1	-	Multi antimicrobial extrusion protein	hypothetical protein CICLE_v10008114mg [Citrus clementina]	chr1	2673713	up2kb	2673756	up2kb	BNv1_01G00721	-	Multi antimicrobial extrusion protein	hypothetical protein CICLE_v10008114mg [Citrus clementina]
BN-HDR133	chr1	2609427	up2kb	2609585	up2kb	CsaV3_1G004180.1	-	Multi antimicrobial extrusion protein	hypothetical protein CICLE_v10008114mg [Citrus clementina]	chr1	2673713	down2kb	2673756	down2kb	BNv1_01G00722	-	Multi antimicrobial extrusion protein	MATE efflux family protein 6-like [Fragaria vesca subsp. vesca]
BN-HDR136	chr1	2620679	down2kb	2622281	down2kb	CsaV3_1G004190.1	-	Multi antimicrobial extrusion protein	hypothetical protein POPTR_0012s04810g [Populus trichocarpa]	chr1	2685420	down2kb	2686926	down2kb	BNv1_01G00724	-	Multi antimicrobial extrusion protein	hypothetical protein POPTR_0012s04810g [Populus trichocarpa]
BN-HDR136	chr1	2620679	down2kb	2622281	down2kb	CsaV3_1G004190.1	-	Multi antimicrobial extrusion protein	hypothetical protein POPTR_0012s04810g [Populus trichocarpa]	chr1	2685420	up2kb	2686926	-	BNv1_01G00723	-	Multi antimicrobial extrusion protein	MATE efflux family protein 6-like [Fragaria vesca subsp. vesca]
BN-CPG137	chr1	2637818	exon11	2637862	exon11	CsaV3_1G004200.1	+	Haem peroxidase, animal	alpha-dioxygenase 2 [Cucumis sativus]	chr1	2702464	down2kb	2702553	down2kb	BNv1_01G00725	+	Haem peroxidase, animal	alpha-dioxygenase 2 [Cucumis sativus]
BN-CPG137	chr1	2637818	down2kb	2637862	down2kb	CsaV3_1G004210.1	-		hypothetical protein PRUPE_ppa024378mg [Prunus persica]	chr1	2702464	down2kb	2702553	down2kb	BNv1_01G00726	-	WD40 repeat	66 kDa stress protein [Cucumis sativus]
BN-HDR138	chr1	2646378	up2kb	2647027	up2kb	CsaV3_1G004220.1	-	WD40 repeat	66 kDa stress protein [Cucumis sativus]	chr1	2711080	up2kb	2711904	up2kb	BNv1_01G00726	-	WD40 repeat	66 kDa stress protein [Cucumis sativus]
BN-HDR138	chr1	2646378	down2kb	2647027	down2kb	CsaV3_1G004230.1	-		unknown [Populus trichocarpa]	chr1	2711080	down2kb	2711904	down2kb	BNv1_01G00727	-		unknown [Populus trichocarpa]
BN-INS139	chr1	2650850	up2kb	2650850	up2kb	CsaV3_1G004230.1	-		unknown [Populus trichocarpa]	chr1	2715719	up2kb	2715813	up2kb	BNv1_01G00727	-		unknown [Populus trichocarpa]
BN-HDR140	chr1	2657867	up2kb	2658067	up2kb	CsaV3_1G004240.1	-	PPC domain	hypothetical protein CICLE_v10032444mg [Citrus clementina]	chr1	2722819	up2kb	2723084	up2kb	BNv1_01G00728	-	PPC domain	hypothetical protein CICLE_v10032444mg [Citrus clementina]
BN-HDR140	chr1	2657867	up2kb	2658067	up2kb	CsaV3_1G004250.1	+	Pentatricopeptide repeat IPR032867	pentatricopeptide repeat-containing protein At4g02750 [Cucumis sativus]	chr1	2722819	up2kb	2723084	up2kb	BNv1_01G00729	+	Pentatricopeptide repeat IPR032867	pentatricopeptide repeat-containing protein At4g02750 [Cucumis sativus]
BN-HDR141	chr1	2661622	exon2	2661646	exon2	CsaV3_1G004250.1	+	Pentatricopeptide repeat IPR032867	pentatricopeptide repeat-containing protein At4g02750 [Cucumis sativus]	chr1	2726635	intron2	2726840	intron2	BNv1_01G00729	+	Pentatricopeptide repeat IPR032867	pentatricopeptide repeat-containing protein At4g02750 [Cucumis sativus]
BN-HDR141	chr1	2661622	down2kb	2661646	down2kb	CsaV3_1G004260.1	-	Protein kinase domain	mitogen-activated protein kinase 9-like [Cucumis sativus]	chr1	2726635	-	2726840	-	-	-		-
BN-HDR142	chr1	2670638	down2kb	2670710	down2kb	CsaV3_1G004270.1	-	Golgin subfamily A member 5	Golgin candidate 2, putative isoform 1 [Theobroma cacao]	chr1	2735889	down2kb	2735891	down2kb	BNv1_01G00730	-	Golgin subfamily A member 5	Golgin candidate 2, putative isoform 1 [Theobroma cacao]
BN-HDR142	chr1	2670638	up2kb	2670710	intron	CsaV3_1G004260.1	-	Protein kinase domain	mitogen-activated protein kinase 9-like [Cucumis sativus]	chr1	2735889	-	2735891	-	-	-		-
BN-CPG143	chr1	2680442	intron1	2680572	intron1	CsaV3_1G004280.1	-	Small GTPase superfamily	ras-related protein RABA6a-like [Cucumis sativus]	chr1	2745676	intron1	2745936	intron1	BNv1_01G00731	-	Small GTPase superfamily	ras-related protein RABA6a-like [Cucumis sativus]
BN-DEL144	chr1	2682762	up2kb	2682814	up2kb	CsaV3_1G004280.1	-	Small GTPase superfamily	ras-related protein RABA6a-like [Cucumis sativus]	chr1	2748119	up2kb	2748120	up2kb	BNv1_01G00731	-	Small GTPase superfamily	ras-related protein RABA6a-like [Cucumis sativus]
BN-HDR145	chr1	2686254	down2kb	2686741	exon1	CsaV3_1G004290.1	-	EF-hand domain	probable calcium-binding protein CML27 [Cucumis sativus]	chr1	2751610	down2kb	2752080	down2kb	BNv1_01G00732	-	EF-hand domain	probable calcium-binding protein CML27 [Cucumis sativus]
BN-HDR147	chr1	2702654	intron3	2702880	intron3	CsaV3_1G004310.1	+	Homeobox domain	WUSCHEL-related homeobox 1 [Cucumis sativus]	chr1	2767927	intron3	2768139	intron3	BNv1_01G00735	+	Homeobox domain	WUSCHEL-related homeobox 1 [Cucumis sativus]
BN-HDR147	chr1	2702654	down2kb	2702880	down2kb	CsaV3_1G004320.1	-		phosphomethylethanolamine N-methyltransferase [Cucumis sativus]	chr1	2767927	down2kb	2768139	down2kb	BNv1_01G00736	-		phosphomethylethanolamine N-methyltransferase [Cucumis sativus]
BN-HDR148	chr1	2714440	up2kb	2714566	up2kb	CsaV3_1G004330.1	-	Methyltransferase type 11	phosphoethanolamine N-methyltransferase-like [Cucumis sativus]	chr1	2779668	up2kb	2779844	up2kb	BNv1_01G00737	-	Methyltransferase type 11	phosphoethanolamine N-methyltransferase-like [Cucumis sativus]
BN-INS151	chr1	2723679	down2kb	2723679	down2kb	CsaV3_1G004340.1	+		putative F-box protein At1g67623 [Cucumis sativus]	chr1	2788944	down2kb	2788998	down2kb	BNv1_01G00738	+		putative F-box protein At1g67623 [Cucumis sativus]
BN-HDR153	chr1	2728988	down2kb	2729498	down2kb	CsaV3_1G004350.1	-	Membrane transport protein	hypothetical protein Csa_1G025070 [Cucumis sativus]	chr1	2794210	-	2794649	down2kb	BNv1_01G00739	-	Membrane transport protein	hypothetical protein Csa_1G025070 [Cucumis sativus]
BN-HDR154	chr1	2773495	up2kb	2773635	up2kb	CsaV3_1G004410.1	-	Aldose 1-/Glucose-6-phosphate 1-epimerase	aldose 1-epimerase [Cucumis sativus]	chr1	2838714	up2kb	2838841	up2kb	BNv1_01G00745	-	Aldose 1-/Glucose-6-phosphate 1-epimerase	aldose 1-epimerase [Cucumis sativus]
BN-HDR154	chr1	2773495	up2kb	2773635	up2kb	CsaV3_1G004430.1	+	Ribosomal protein L19/L19e	60S ribosomal protein L19-3-like [Cucumis sativus]	chr1	2838714	up2kb	2838841	up2kb	BNv1_01G00746	+	Ribosomal protein L19/L19e	60S ribosomal protein L19-3-like [Cucumis sativus]
BN-HDR154	chr1	2773495	down2kb	2773635	down2kb	CsaV3_1G004420.1	-	Helicase, C-terminal IPR011545	DEAD-box ATP-dependent RNA helicase 42 [Cucumis sativus]	chr1	2838714	-	2838841	-	-	-		-
BN-HDR155	chr1	2781323	up2kb	2782051	up2kb	CsaV3_1G004420.1	-	Helicase, C-terminal IPR011545	DEAD-box ATP-dependent RNA helicase 42 [Cucumis sativus]	chr1	2846503	intron40	2847187	intron40	BNv1_01G00747	-	Fructose-bisphosphate aldolase, class-II IPR001650	uncharacterized protein LOC101221907 isoform X1 [Cucumis sativus]
BN-HDR155	chr1	2781323	down2kb	2782051	down2kb	CsaV3_1G004440.1	-	Fructose-bisphosphate aldolase, class-II IPR006115	uncharacterized protein LOC101221907 isoform X1 [Cucumis sativus]	chr1	2846503	intron40	2847187	intron40	BNv1_01G00747	-	Fructose-bisphosphate aldolase, class-II IPR001650	uncharacterized protein LOC101221907 isoform X1 [Cucumis sativus]
BN-HDR157	chr1	2799467	up2kb	2799889	up2kb	CsaV3_1G004440.1	-	Fructose-bisphosphate aldolase, class-II IPR006115	uncharacterized protein LOC101221907 isoform X1 [Cucumis sativus]	chr1	2864668	up2kb	2866186	-	BNv1_01G00747	-	Fructose-bisphosphate aldolase, class-II IPR001650	uncharacterized protein LOC101221907 isoform X1 [Cucumis sativus]
BN-HDR157	chr1	2799467	up2kb	2799889	up2kb	CsaV3_1G004450.1	+	GTP binding domain	uncharacterized protein LOC101223165 [Cucumis sativus]	chr1	2864668	-	2866186	up2kb	BNv1_01G00748	+	GTP binding domain	uncharacterized protein LOC101223165 [Cucumis sativus]
BN-INS156	chr1	2797878	intron1	2797879	intron1	CsaV3_1G004440.1	-	Fructose-bisphosphate aldolase, class-II IPR006115	uncharacterized protein LOC101221907 isoform X1 [Cucumis sativus]	chr1	2862992	intron1	2863080	intron1	BNv1_01G00747	-	Fructose-bisphosphate aldolase, class-II IPR001650	uncharacterized protein LOC101221907 isoform X1 [Cucumis sativus]
BN-HDR158	chr1	2810001	intron1	2810299	intron1	CsaV3_1G004460.1	-	Protein of unknown function DUF4228, plant	uncharacterized protein LOC101203132 [Cucumis sativus]	chr1	2876298	intron1	2876641	intron1	BNv1_01G00749	-	Protein of unknown function DUF4228, plant	uncharacterized protein LOC101203132 [Cucumis sativus]
BN-HDR159	chr1	2813111	up2kb	2813127	up2kb	CsaV3_1G004460.1	-	Protein of unknown function DUF4228, plant	uncharacterized protein LOC101203132 [Cucumis sativus]	chr1	2879429	up2kb	2879629	up2kb	BNv1_01G00749	-	Protein of unknown function DUF4228, plant	uncharacterized protein LOC101203132 [Cucumis sativus]
BN-HDR161	chr1	2816502	up2kb	2816559	up2kb	CsaV3_1G004470.1	+	Protein of unknown function DUF3007	uncharacterized protein LOC101203378 [Cucumis sativus]	chr1	2883001	-	2883273	up2kb	BNv1_01G00750	+	Protein of unknown function DUF3007	uncharacterized protein LOC101203378 [Cucumis sativus]
BN-CPG162	chr1	2845633	intron8	2845672	intron8	CsaV3_1G004510.1	+	Kinesin motor domain	Kinesin, putative isoform 1 [Theobroma cacao]	chr1	2912233	intron8	2912313	intron8	BNv1_01G00754	+	Kinesin motor domain	Kinesin, putative isoform 1 [Theobroma cacao]
BN-INS163	chr1	2855362	up2kb	2855364	up2kb	CsaV3_1G004520.1	-		uncharacterized protein LOC101204110 isoform X1 [Cucumis sativus]	chr1	2922014	up2kb	2922463	-	BNv1_01G00755	-		uncharacterized protein LOC101204110 isoform X1 [Cucumis sativus]
BN-INS163	chr1	2855362	up2kb	2855364	up2kb	CsaV3_1G004530.1	+	Zinc finger, CCHC-type IPR025836	hypothetical protein PRUPE_ppa016997mg [Prunus persica]	chr1	2922014	up2kb	2922463	up2kb	BNv1_01G00756	+	Zinc finger, CCHC-type	hypothetical protein PRUPE_ppa016997mg [Prunus persica]
BN-HDR164	chr1	2861043	down2kb	2861100	down2kb	CsaV3_1G004530.1	+	Zinc finger, CCHC-type IPR025836	hypothetical protein PRUPE_ppa016997mg [Prunus persica]	chr1	2928123	down2kb	2928247	down2kb	BNv1_01G00756	+	Zinc finger, CCHC-type	hypothetical protein PRUPE_ppa016997mg [Prunus persica]
BN-HDR164	chr1	2861043	up2kb	2861100	up2kb	CsaV3_1G004540.1	+	Protein kinase domain	serine/threonine-protein kinase TOUSLED isoform X2 [Cucumis sativus]	chr1	2928123	-	2928247	-	-	-		-
BN-CPL165	chr1	2868579	intron6	2868763	intron6	CsaV3_1G004540.1	+	Protein kinase domain	serine/threonine-protein kinase TOUSLED isoform X2 [Cucumis sativus]	chr1	2935754	intron6	2935839	intron6	BNv1_01G00757	+	Protein kinase domain	serine/threonine-protein kinase TOUSLED isoform X2 [Cucumis sativus]
BN-CPL167	chr1	2886565	up2kb	2887282	up2kb	CsaV3_1G004560.1	-	Strictosidine synthase, conserved region	protein STRICTOSIDINE SYNTHASE-LIKE 3 [Cucumis sativus]	chr1	2953634	up2kb	2953648	up2kb	BNv1_01G00759	-	Strictosidine synthase, conserved region	protein STRICTOSIDINE SYNTHASE-LIKE 3 [Cucumis sativus]
BN-HDR170	chr1	2889947	up2kb	2890040	up2kb	CsaV3_1G004570.1	+	Squalene cyclase, C-terminal IPR032697	Full=Probable oxidosqualene cyclase [Cucurbita pepo]	chr1	2956369	up2kb	2956678	up2kb	BNv1_01G00760	+	Squalene cyclase, C-terminal IPR032697	Full=Probable oxidosqualene cyclase [Cucurbita pepo]
BN-HDR171	chr1	2946590	up2kb	2946752	up2kb	CsaV3_1G004650.1	+		F-box protein At5g46170-like [Cucumis sativus]	chr1	3013209	up2kb	3013254	up2kb	BNv1_01G00770	+		F-box protein At5g46170-like [Cucumis sativus]
BN-INS172	chr1	2966149	up2kb	2966152	up2kb	CsaV3_1G004680.1	-		-	chr1	3032612	up2kb	3032804	up2kb	BNv1_01G00772	-		-
BN-INS172	chr1	2966149	down2kb	2966152	down2kb	CsaV3_1G004670.1	+		-	chr1	3032612	-	3032804	-	-	-		-
BN-INS172	chr1	2966149	-	2966152	-	-	-		-	chr1	3032612	up2kb	3032804	-	BNv1_01G00771	-	Transcription factor, TCP	transcription factor TCP2 [Cucumis sativus]
BN-CPL181	chr1	2978821	exon5	2978994	exon5	CsaV3_1G004690.1	-	Major facilitator, sugar transporter-like	hypothetical protein CICLE_v10014738mg [Citrus clementina]	chr1	3046960	down2kb	3046968	down2kb	BNv1_01G00773	-	Major facilitator, sugar transporter-like	hypothetical protein CICLE_v10014738mg [Citrus clementina]
BN-DEL179	chr1	2977359	down2kb	2977569	down2kb	CsaV3_1G004690.1	-	Major facilitator, sugar transporter-like	hypothetical protein CICLE_v10014738mg [Citrus clementina]	chr1	3045564	down2kb	3045564	down2kb	BNv1_01G00773	-	Major facilitator, sugar transporter-like	hypothetical protein CICLE_v10014738mg [Citrus clementina]
BN-HDR178	chr1	2976331	intron	2976587	down2kb	CsaV3_1G004690.1	-	Major facilitator, sugar transporter-like	hypothetical protein CICLE_v10014738mg [Citrus clementina]	chr1	3044406	-	3044762	-	-	-		-
BN-HDR180	chr1	2978598	exon5	2978606	exon5	CsaV3_1G004690.1	-	Major facilitator, sugar transporter-like	hypothetical protein CICLE_v10014738mg [Citrus clementina]	chr1	3046635	down2kb	3046744	down2kb	BNv1_01G00773	-	Major facilitator, sugar transporter-like	hypothetical protein CICLE_v10014738mg [Citrus clementina]
BN-HDR182	chr1	2983483	up2kb	2983819	up2kb	CsaV3_1G004690.1	-	Major facilitator, sugar transporter-like	hypothetical protein CICLE_v10014738mg [Citrus clementina]	chr1	3051509	up2kb	3051884	up2kb	BNv1_01G00773	-	Major facilitator, sugar transporter-like	hypothetical protein CICLE_v10014738mg [Citrus clementina]
BN-CPL183	chr1	2987376	up2kb	2987445	up2kb	CsaV3_1G004710.1	+	RNA recognition motif domain	U2 small nuclear ribonucleoprotein B'' 2-like [Cucumis sativus]	chr1	3055410	up2kb	3055418	up2kb	BNv1_01G00774	+	RNA recognition motif domain	U2 small nuclear ribonucleoprotein B'' 2-like [Cucumis sativus]
BN-CPL183	chr1	2987376	down2kb	2987445	down2kb	CsaV3_1G004700.1	-		-	chr1	3055410	-	3055418	-	-	-		-
BN-INS184	chr1	3003872	exon6	3003873	exon6	CsaV3_1G004740.1	-	Manganese/iron superoxide dismutase, N-terminal IPR019832	Superoxide dismutase [Mn] [Cucumis sativus]	chr1	3071823	down2kb	3071963	down2kb	BNv1_01G00777	-	Manganese/iron superoxide dismutase, N-terminal IPR019832	Superoxide dismutase [Mn] [Cucumis sativus]
BN-NOTAL8	chr1	3038686	intron6	3040176	intron6	CsaV3_1G004780.1	-	B3 DNA binding domain IPR011124	High-level expression of sugar-inducible gene 2, putative isoform 1 [Theobroma cacao]	-	-	-	-	-	-	-		-
BN-CPL187	chr1	3048319	intron3	3048584	intron3	CsaV3_1G004780.1	-	B3 DNA binding domain IPR011124	High-level expression of sugar-inducible gene 2, putative isoform 1 [Theobroma cacao]	chr1	3114638	-	3114770	-	-	-		-
BN-INVDP4095	chr1	3032856	intron6	3033126	intron6	CsaV3_1G004780.1	-	B3 DNA binding domain IPR011124	High-level expression of sugar-inducible gene 2, putative isoform 1 [Theobroma cacao]	chr1	32364808	-	32365078	-	-	-		-
BN-INVDP4095	chr1	3032856	-	3033126	-	-	-		-	chr1	32364808	intron16	32365078	intron16	BNv1_01G03486	+	CRM1 C-terminal domain	hypothetical protein PRUPE_ppa000522mg [Prunus persica]
BN-INVDP4857	chr1	3046690	intron3	3047994	intron3	CsaV3_1G004780.1	-	B3 DNA binding domain IPR011124	High-level expression of sugar-inducible gene 2, putative isoform 1 [Theobroma cacao]	chr4	26980211	-	26981488	-	-	-		-
BN-INVDP4858	chr1	3046696	intron3	3047993	intron3	CsaV3_1G004780.1	-	B3 DNA binding domain IPR011124	High-level expression of sugar-inducible gene 2, putative isoform 1 [Theobroma cacao]	chr5	29441309	-	29442606	-	-	-		-
BN-INVDP4858	chr1	3046696	-	3047993	-	-	-		-	chr5	29441309	intron8	29442606	intron8	BNv1_05G15439	+		uncharacterized protein LOC102618788 isoform X1 [Citrus sinensis]
BN-INVDP4859	chr1	3046696	intron3	3048000	intron3	CsaV3_1G004780.1	-	B3 DNA binding domain IPR011124	High-level expression of sugar-inducible gene 2, putative isoform 1 [Theobroma cacao]	chr2	29204581	-	29205843	-	-	-		-
BN-INVDP4859	chr1	3046696	-	3048000	-	-	-		-	chr2	29204581	-	29205843	down2kb	BNv1_02G06097	-		helicase FANCM [Arabidopsis thaliana]
BN-TDM186	chr1	3036738	intron6	3036853	intron6	CsaV3_1G004780.1	-	B3 DNA binding domain IPR011124	High-level expression of sugar-inducible gene 2, putative isoform 1 [Theobroma cacao]	chr1	3104327	-	3104402	-	-	-		-
BN-DEL195	chr1	3109298	intron7	3112157	intron7	CsaV3_1G004790.1	-	Protein kinase domain IPR001611	probable LRR receptor-like serine/threonine-protein kinase At1g06840 [Cucumis sativus]	chr1	3177787	intron7	3177789	intron7	BNv1_01G00783	-	Protein kinase domain IPR001611	probable LRR receptor-like serine/threonine-protein kinase At1g06840 [Cucumis sativus]
BN-INS192	chr1	3089855	intron15	3089856	intron15	CsaV3_1G004790.1	-	Protein kinase domain IPR001611	probable LRR receptor-like serine/threonine-protein kinase At1g06840 [Cucumis sativus]	chr1	3155659	intron15	3156604	intron15	BNv1_01G00783	-	Protein kinase domain IPR001611	probable LRR receptor-like serine/threonine-protein kinase At1g06840 [Cucumis sativus]
BN-CPG194	chr1	3100963	intron11	3100990	intron11	CsaV3_1G004790.1	-	Protein kinase domain IPR001611	probable LRR receptor-like serine/threonine-protein kinase At1g06840 [Cucumis sativus]	chr1	3169450	intron11	3169510	intron11	BNv1_01G00783	-	Protein kinase domain IPR001611	probable LRR receptor-like serine/threonine-protein kinase At1g06840 [Cucumis sativus]
BN-CPL189	chr1	3069626	intron19	3069758	intron19	CsaV3_1G004790.1	-	Protein kinase domain IPR001611	probable LRR receptor-like serine/threonine-protein kinase At1g06840 [Cucumis sativus]	chr1	3135853	intron19	3135863	intron19	BNv1_01G00783	-	Protein kinase domain IPR001611	probable LRR receptor-like serine/threonine-protein kinase At1g06840 [Cucumis sativus]
BN-DEL191	chr1	3086847	intron16	3087388	intron16	CsaV3_1G004790.1	-	Protein kinase domain IPR001611	probable LRR receptor-like serine/threonine-protein kinase At1g06840 [Cucumis sativus]	chr1	3153203	intron16	3153205	intron16	BNv1_01G00783	-	Protein kinase domain IPR001611	probable LRR receptor-like serine/threonine-protein kinase At1g06840 [Cucumis sativus]
BN-INS190	chr1	3077277	intron18	3077279	intron18	CsaV3_1G004790.1	-	Protein kinase domain IPR001611	probable LRR receptor-like serine/threonine-protein kinase At1g06840 [Cucumis sativus]	chr1	3143385	intron18	3143647	intron18	BNv1_01G00783	-	Protein kinase domain IPR001611	probable LRR receptor-like serine/threonine-protein kinase At1g06840 [Cucumis sativus]
BN-INS193	chr1	3091455	intron15	3091457	intron15	CsaV3_1G004790.1	-	Protein kinase domain IPR001611	probable LRR receptor-like serine/threonine-protein kinase At1g06840 [Cucumis sativus]	chr1	3158209	intron15	3159937	intron15	BNv1_01G00783	-	Protein kinase domain IPR001611	probable LRR receptor-like serine/threonine-protein kinase At1g06840 [Cucumis sativus]
BN-INVDP4860	chr1	3082863	intron16	3083642	intron16	CsaV3_1G004790.1	-	Protein kinase domain IPR001611	probable LRR receptor-like serine/threonine-protein kinase At1g06840 [Cucumis sativus]	chr5	24369666	-	24370440	-	-	-		-
BN-INVDP4860	chr1	3082863	-	3083642	-	-	-		-	chr5	24369666	intron1	24370440	intron1	BNv1_05G15047	-	Domain of unknown function DUF4218	hypothetical protein VITISV_018031 [Vitis vinifera]
BN-DEL197	chr1	3214170	intron3	3214351	intron3	CsaV3_1G004890.1	-	DhaK domain IPR004007	putative 3,4-dihydroxy-2-butanone kinase [Cucumis sativus]	chr1	3275026	intron3	3275030	intron3	BNv1_01G00792	-	DhaK domain IPR004007	putative 3,4-dihydroxy-2-butanone kinase [Cucumis sativus]
BN-DUP4861	chr1	3206849	intron5	3211637	intron5	CsaV3_1G004890.1	-	DhaK domain IPR004007	putative 3,4-dihydroxy-2-butanone kinase [Cucumis sativus]	chr6	6743179	-	6747936	-	-	-		-
BN-DUP4861	chr1	3206849	-	3211637	-	-	-		-	chr6	6743179	intron1	6747936	intron1	BNv1_06G17489	+	Transcription factor, MADS-box	MADS-box protein 15 [Petunia x hybrida]
BN-DUP4863	chr1	3206850	intron5	3211637	intron5	CsaV3_1G004890.1	-	DhaK domain IPR004007	putative 3,4-dihydroxy-2-butanone kinase [Cucumis sativus]	chr2	13173350	-	13178108	-	-	-		-
BN-DUP4864	chr1	3206850	intron5	3211637	intron5	CsaV3_1G004890.1	-	DhaK domain IPR004007	putative 3,4-dihydroxy-2-butanone kinase [Cucumis sativus]	chr3	7851054	-	7855827	-	-	-		-
BN-DUP4864	chr1	3206850	-	3211637	-	-	-		-	chr3	7851054	intron1	7855827	intron1	BNv1_03G07369	+	PPC domain	hypothetical protein CICLE_v10021116mg [Citrus clementina]
BN-INVDP4862	chr1	3206850	intron5	3209472	intron5	CsaV3_1G004890.1	-	DhaK domain IPR004007	putative 3,4-dihydroxy-2-butanone kinase [Cucumis sativus]	chr4	5717247	-	5719621	-	-	-		-
BN-INVDP4862	chr1	3206850	-	3209472	-	-	-		-	chr4	5717247	intron4	5719621	intron4	BNv1_04G11716	+	Anaphase-promoting complex subunit 5	hypothetical protein PRUPE_ppa001059mg [Prunus persica]
BN-INVDP4865	chr1	3206850	intron5	3211637	intron5	CsaV3_1G004890.1	-	DhaK domain IPR004007	putative 3,4-dihydroxy-2-butanone kinase [Cucumis sativus]	chr4	8502433	-	8507183	-	-	-		-
BN-INVDP4866	chr1	3206850	intron5	3211637	intron5	CsaV3_1G004890.1	-	DhaK domain IPR004007	putative 3,4-dihydroxy-2-butanone kinase [Cucumis sativus]	chr4	33208684	-	33213415	-	-	-		-
BN-INVDP4867	chr1	3206850	intron5	3211638	intron5	CsaV3_1G004890.1	-	DhaK domain IPR004007	putative 3,4-dihydroxy-2-butanone kinase [Cucumis sativus]	chr6	14212504	-	14217243	-	-	-		-
BN-INVDP4867	chr1	3206850	-	3211638	-	-	-		-	chr6	14212504	down2kb	14217243	-	BNv1_06G18233	+	Late embryogenesis abundant protein, LEA-14	uncharacterized protein LOC105435999 [Cucumis sativus]
BN-TRANS1814	chr1	3206849	intron5	3211637	intron5	CsaV3_1G004890.1	-	DhaK domain IPR004007	putative 3,4-dihydroxy-2-butanone kinase [Cucumis sativus]	chr1	14093879	-	14098639	-	-	-		-
BN-INVDP4868	chr1	3235699	down2kb	3236243	down2kb	CsaV3_1G004910.1	+	RNA polymerase II subunit A	RNA polymerase II subunit A C-terminal domain phosphatase SSU72 [Cucumis sativus]	chr5	13466641	-	13467184	-	-	-		-
BN-INVDP4868	chr1	3235699	down2kb	3236243	down2kb	CsaV3_1G004920.1	-	Guanine nucleotide binding protein (G-protein), alpha subunit	hypothetical protein PHAVU_004G147400g [Phaseolus vulgaris]	chr5	13466641	-	13467184	-	-	-		-
BN-INVDP4868	chr1	3235699	-	3236243	-	-	-		-	chr5	13466641	down2kb	13467184	down2kb	BNv1_05G14738	-	GLABROUS1 enhancer-binding protein family	-
BN-CPL198	chr1	3255267	up2kb	3255612	up2kb	CsaV3_1G004940.1	+	Protein kinase domain	hypothetical protein PRUPE_ppa000304mg [Prunus persica]	chr1	3315946	up2kb	3316118	up2kb	BNv1_01G00796	+	Protein kinase domain	hypothetical protein PRUPE_ppa000304mg [Prunus persica]
BN-CPG202	chr1	3313551	intron5	3313708	intron5	CsaV3_1G004980.1	-	DnaJ domain	hypothetical protein PRUPE_ppa027015mg, partial [Prunus persica]	chr1	3373463	intron5	3373783	intron5	BNv1_01G00799	-	DnaJ domain	hypothetical protein PRUPE_ppa027015mg, partial [Prunus persica]
BN-CPG202	chr1	3313551	up2kb	3313708	up2kb	CsaV3_1G004960.1	-	Chaperone DnaJ, C-terminal	Chaperone protein DnaJ [Glycine soja]	chr1	3373463	-	3373783	-	-	-		-
BN-DEL201	chr1	3300309	intron3	3300817	intron3	CsaV3_1G004960.1	-	Chaperone DnaJ, C-terminal	Chaperone protein DnaJ [Glycine soja]	chr1	3360784	intron1	3360785	intron1	BNv1_01G00798	-		Chaperone protein DnaJ [Glycine soja]
BN-HDR200	chr1	3296921	intron3	3296928	intron3	CsaV3_1G004960.1	-	Chaperone DnaJ, C-terminal	Chaperone protein DnaJ [Glycine soja]	chr1	3357355	intron3	3357414	intron3	BNv1_01G00798	-		Chaperone protein DnaJ [Glycine soja]
BN-NOTAL9	chr1	3325362	intron1	3325430	intron1	CsaV3_1G004980.1	-	DnaJ domain	hypothetical protein PRUPE_ppa027015mg, partial [Prunus persica]	-	-	-	-	-	-	-		-
BN-NOTAL9	chr1	3325362	down2kb	3325430	down2kb	CsaV3_1G004990.1	-	Multicopper oxidase, type 1 IPR011706	L-ascorbate oxidase homolog [Cucumis sativus]	-	-	-	-	-	-	-		-
BN-HDR203	chr1	3330876	down2kb	3331217	down2kb	CsaV3_1G005000.1	-	Pyridoxal phosphate-dependent decarboxylase	glutamate decarboxylase [Cucumis sativus]	chr1	3395223	down2kb	3395595	down2kb	BNv1_01G00801	-	Pyridoxal phosphate-dependent decarboxylase	glutamate decarboxylase [Cucumis sativus]
BN-CPG205	chr1	3409917	down2kb	3409958	down2kb	CsaV3_1G005110.1	+	Protein Networked (NET), actin-binding (NAB) domain	kinase-interacting family protein [Cucumis sativus]	chr1	3474266	down2kb	3474366	down2kb	BNv1_01G00812	+	Protein Networked (NET), actin-binding (NAB) domain	kinase-interacting family protein [Cucumis sativus]
BN-CPG205	chr1	3409917	intron6	3409958	intron6	CsaV3_1G005120.1	-		uncharacterized protein LOC101213093 [Cucumis sativus]	chr1	3474266	-	3474366	-	-	-		-
BN-INS206	chr1	3410425	down2kb	3410429	down2kb	CsaV3_1G005110.1	+	Protein Networked (NET), actin-binding (NAB) domain	kinase-interacting family protein [Cucumis sativus]	chr1	3474835	down2kb	3474962	down2kb	BNv1_01G00812	+	Protein Networked (NET), actin-binding (NAB) domain	kinase-interacting family protein [Cucumis sativus]
BN-INS206	chr1	3410425	intron6	3410429	intron6	CsaV3_1G005120.1	-		uncharacterized protein LOC101213093 [Cucumis sativus]	chr1	3474835	-	3474962	-	-	-		-
BN-DUP4869	chr1	3416939	down2kb	3417960	down2kb	CsaV3_1G005130.1	+	Glycoside hydrolase family 16 IPR010713	xyloglucan endotransglucosylase/hydrolase protein 9 [Cucumis sativus]	chr4	29609974	-	29610995	-	-	-		-
BN-DUP4869	chr1	3416939	down2kb	3417960	exon6	CsaV3_1G005140.1	-	Nascent polypeptide-associated complex NAC domain	transcription factor BTF3 homolog 4-like isoform X1 [Cucumis sativus]	chr4	29609974	-	29610995	-	-	-		-
BN-DUP4869	chr1	3416939	-	3417960	-	-	-		-	chr4	29609974	up2kb	29610995	-	BNv1_04G13419	-	DOMON domain IPR006593	cytochrome b561, DM13 and DOMON domain-containing protein At5g54830 [Cucumis sativus]
BN-DUP4869	chr1	3416939	-	3417960	-	-	-		-	chr4	29609974	up2kb	29610995	up2kb	BNv1_04G13420	+	ATPase, AAA-type, core IPR004176	chaperone protein ClpB4, mitochondrial [Cucumis sativus]
BN-HDR207	chr1	3448247	up2kb	3448722	up2kb	CsaV3_1G005190.1	+	Pectate lyase/Amb allergen	probable pectate lyase 4 [Cicer arietinum]	chr1	3511852	-	3512358	up2kb	BNv1_01G00820	+	Pectate lyase/Amb allergen	probable pectate lyase 4 [Cicer arietinum]
BN-CPL213	chr1	3482165	intron4	3482376	intron4	CsaV3_1G005250.1	-		UPF0426 protein At1g28150, chloroplastic [Cucumis sativus]	chr1	3546325	down2kb	3546430	down2kb	BNv1_01G00827	-		UPF0426 protein At1g28150, chloroplastic [Cucumis sativus]
BN-CPL213	chr1	3482165	intron4	3482376	intron4	CsaV3_1G005250.1	-		UPF0426 protein At1g28150, chloroplastic [Cucumis sativus]	chr1	3546325	intron1	3546430	intron1	BNv1_01G00826	-		-
BN-HDR212	chr1	3480555	down2kb	3481420	intron5	CsaV3_1G005250.1	-		UPF0426 protein At1g28150, chloroplastic [Cucumis sativus]	chr1	3544626	down2kb	3545563	intron2	BNv1_01G00826	-		-
BN-HDR214	chr1	3505567	down2kb	3505849	down2kb	CsaV3_1G005290.1	+	Myc-type, basic helix-loop-helix (bHLH) domain	hypothetical protein PRUPE_ppa022186mg [Prunus persica]	chr1	3569620	down2kb	3569875	down2kb	BNv1_01G00830	+	Myc-type, basic helix-loop-helix (bHLH) domain	hypothetical protein PRUPE_ppa022186mg [Prunus persica]
BN-HDR214	chr1	3505567	exon1	3505849	exon1	CsaV3_1G005300.1	-	Pectinesterase inhibitor domain	pectinesterase 3 [Cucumis sativus]	chr1	3569620	down2kb	3569875	down2kb	BNv1_01G00831	-	Pectinesterase inhibitor domain	pectinesterase 3 [Cucumis sativus]
BN-CPG215	chr1	3525025	intron8	3525061	intron8	CsaV3_1G005360.1	-	Nucleosome assembly protein (NAP)	hypothetical protein PRUPE_ppa010080mg [Prunus persica]	chr1	3589066	intron8	3589168	intron8	BNv1_01G00837	-	Nucleosome assembly protein (NAP)	hypothetical protein PRUPE_ppa010080mg [Prunus persica]
BN-HDR216	chr1	3555319	down2kb	3555659	down2kb	CsaV3_1G005460.1	+	Pentatricopeptide repeat IPR032867	pentatricopeptide repeat-containing protein At1g74630 [Cucumis sativus]	chr1	3619429	down2kb	3619761	down2kb	BNv1_01G00849	+	Pentatricopeptide repeat IPR032867	pentatricopeptide repeat-containing protein At1g74630 [Cucumis sativus]
BN-HDR216	chr1	3555319	up2kb	3555659	up2kb	CsaV3_1G005470.1	+	Alpha/beta hydrolase fold-1	uncharacterized protein LOC101217261 [Cucumis sativus]	chr1	3619429	up2kb	3619761	up2kb	BNv1_01G00850	+	Alpha/beta hydrolase fold-1	uncharacterized protein LOC101217261 [Cucumis sativus]
BN-INS217	chr1	3560127	down2kb	3560128	down2kb	CsaV3_1G005470.1	+	Alpha/beta hydrolase fold-1	uncharacterized protein LOC101217261 [Cucumis sativus]	chr1	3624229	down2kb	3624278	down2kb	BNv1_01G00850	+	Alpha/beta hydrolase fold-1	uncharacterized protein LOC101217261 [Cucumis sativus]
BN-HDR220	chr1	3579560	up2kb	3579901	up2kb	CsaV3_1G005490.1	+	ZF-HD homeobox protein, Cys/His-rich dimerisation domain	mini zinc finger protein 1 [Cucumis sativus]	chr1	3643821	up2kb	3644126	up2kb	BNv1_01G00852	+	ZF-HD homeobox protein, Cys/His-rich dimerisation domain	mini zinc finger protein 1 [Cucumis sativus]
BN-INS223	chr1	3616600	down2kb	3616602	down2kb	CsaV3_1G005550.1	+	EF-hand domain	probable calcium-binding protein CML47 [Cucumis sativus]	chr1	3680902	down2kb	3681083	down2kb	BNv1_01G00857	+	EF-hand domain	probable calcium-binding protein CML47 [Cucumis sativus]
BN-INS223	chr1	3616600	up2kb	3616602	up2kb	CsaV3_1G005560.1	+		-	chr1	3680902	up2kb	3681083	up2kb	BNv1_01G00858	+		-
BN-INS223	chr1	3616600	up2kb	3616602	up2kb	CsaV3_1G005570.1	+		putative lipoate-protein ligase A [Cucumis sativus]	chr1	3680902	up2kb	3681083	up2kb	BNv1_01G00859	+		putative lipoate-protein ligase A [Cucumis sativus]
BN-CPG224	chr1	3630964	up2kb	3630976	up2kb	CsaV3_1G005610.1	-	Expansin, cellulose-binding-like domain IPR009009	expansin-A15-like [Cucumis sativus]	chr1	3695459	up2kb	3695530	up2kb	BNv1_01G00863	-	Expansin, cellulose-binding-like domain IPR009009	expansin-A15-like [Cucumis sativus]
BN-DEL227	chr1	3695338	up2kb	3695938	up2kb	CsaV3_1G005740.1	-	Protein of unknown function DUF538	uncharacterized protein At5g01610-like [Cucumis sativus]	chr1	3760019	up2kb	3760022	up2kb	BNv1_01G00876	-	Protein of unknown function DUF538	uncharacterized protein At5g01610-like [Cucumis sativus]
BN-DEL227	chr1	3695338	up2kb	3695938	up2kb	CsaV3_1G005760.1	+	Protein of unknown function DUF863, plant	Uncharacterized protein isoform 1 [Theobroma cacao]	chr1	3760019	up2kb	3760022	up2kb	BNv1_01G00877	+	Protein of unknown function DUF863, plant	Uncharacterized protein isoform 1 [Theobroma cacao]
BN-DEL227	chr1	3695338	down2kb	3695938	down2kb	CsaV3_1G005750.1	-	Flavin monooxygenase-like	hypothetical protein PRUPE_ppa005373mg [Prunus persica]	chr1	3760019	-	3760022	-	-	-		-
BN-HDR229	chr1	3704843	up2kb	3704848	up2kb	CsaV3_1G005750.1	-	Flavin monooxygenase-like	hypothetical protein PRUPE_ppa005373mg [Prunus persica]	chr1	3768918	up2kb	3769005	up2kb	BNv1_01G00878	-	Flavin monooxygenase-like	hypothetical protein PRUPE_ppa005373mg [Prunus persica]
BN-CPG230	chr1	3707179	up2kb	3707213	up2kb	CsaV3_1G005770.1	+	Calmodulin-binding domain, plant	muscle M-line assembly protein unc-89-like [Glycine max]	chr1	3771356	-	3771425	-	-	-		-
BN-INS232	chr1	3866899	up2kb	3866900	up2kb	CsaV3_1G006010.1	-	Glycerophosphodiester phosphodiesterase domain	glycerophosphodiester phosphodiesterase GDPD6 [Cucumis sativus]	chr1	3934948	up2kb	3934997	up2kb	BNv1_01G00901	-	Glycerophosphodiester phosphodiesterase domain	glycerophosphodiester phosphodiesterase GDPD6 [Cucumis sativus]
BN-INS232	chr1	3866899	down2kb	3866900	down2kb	CsaV3_1G006020.1	-	Jas TPL-binding domain IPR032310	hypothetical protein Csa_1G039230 [Cucumis sativus]	chr1	3934948	down2kb	3934997	down2kb	BNv1_01G00902	-	Jas TPL-binding domain IPR032310	hypothetical protein Csa_1G039230 [Cucumis sativus]
BN-HDR233	chr1	3871154	up2kb	3871266	up2kb	CsaV3_1G006020.1	-	Jas TPL-binding domain IPR032310	hypothetical protein Csa_1G039230 [Cucumis sativus]	chr1	3939254	up2kb	3939635	-	BNv1_01G00902	-	Jas TPL-binding domain IPR032310	hypothetical protein Csa_1G039230 [Cucumis sativus]
BN-HDR233	chr1	3871154	down2kb	3871266	down2kb	CsaV3_1G006030.1	+		-	chr1	3939254	-	3939635	-	-	-		-
BN-HDR234	chr1	3885212	down2kb	3885263	down2kb	CsaV3_1G006070.1	+	Transcription factor, TCP	transcription factor TCP5 [Cucumis sativus]	chr1	3953584	down2kb	3953586	down2kb	BNv1_01G00905	+	Transcription factor, TCP	transcription factor TCP5 [Cucumis sativus]
BN-HDR234	chr1	3885212	down2kb	3885263	down2kb	CsaV3_1G006080.1	-	Domain of unknown function DUF4378 IPR032795	protein LONGIFOLIA 1-like [Cucumis sativus]	chr1	3953584	down2kb	3953586	down2kb	BNv1_01G00906	-	Domain of unknown function DUF4378 IPR032795	protein LONGIFOLIA 1-like [Cucumis sativus]
BN-HDR235	chr1	3895023	down2kb	3895179	down2kb	CsaV3_1G006090.1	-	FCP1 homology domain	uncharacterized protein LOC101203219 isoform X2 [Cucumis sativus]	chr1	3963331	-	3963533	-	-	-		-
BN-HDR239	chr1	3995776	up2kb	3995837	up2kb	CsaV3_1G006260.1	-		uncharacterized protein LOC101207962 isoform X2 [Cucumis sativus]	chr1	4064243	up2kb	4064813	-	BNv1_01G00922	-		uncharacterized protein LOC101207962 isoform X2 [Cucumis sativus]
BN-HDR239	chr1	3995776	down2kb	3995837	down2kb	CsaV3_1G006250.1	+		hypothetical protein PRUPE_ppa025572mg [Prunus persica]	chr1	4064243	-	4064813	-	-	-		-
BN-HDR239	chr1	3995776	-	3995837	-	-	-		-	chr1	4064243	intron1	4064813	intron1	BNv1_01G00923	+		-
BN-HDR240	chr1	3996387	down2kb	3996536	down2kb	CsaV3_1G006250.1	+		hypothetical protein PRUPE_ppa025572mg [Prunus persica]	chr1	4065363	-	4065463	-	-	-		-
BN-HDR240	chr1	3996387	up2kb	3996536	up2kb	CsaV3_1G006260.1	-		uncharacterized protein LOC101207962 isoform X2 [Cucumis sativus]	chr1	4065363	-	4065463	-	-	-		-
BN-HDR240	chr1	3996387	-	3996536	-	-	-		-	chr1	4065363	down2kb	4065463	down2kb	BNv1_01G00923	+		-
BN-HDR241	chr1	4015931	up2kb	4016013	up2kb	CsaV3_1G006290.1	-	Zinc finger, RING-type IPR019787	PHD and RING finger domain-containing protein C126.07c-like [Solanum tuberosum]	chr1	4084810	up2kb	4084972	up2kb	BNv1_01G00926	-	Zinc finger, RING-type IPR019787	PHD and RING finger domain-containing protein C126.07c-like [Solanum tuberosum]
BN-HDR241	chr1	4015931	up2kb	4016013	up2kb	CsaV3_1G006300.1	+		-	chr1	4084810	up2kb	4084972	up2kb	BNv1_01G00927	+		-
BN-CPL242	chr1	4018222	down2kb	4018285	down2kb	CsaV3_1G006300.1	+		-	chr1	4087176	down2kb	4087193	down2kb	BNv1_01G00927	+		-
BN-CPL242	chr1	4018222	exon2	4018285	exon2	CsaV3_1G006310.1	-	Basic-leucine zipper domain	basic leucine zipper 43-like [Cucumis sativus]	chr1	4087176	down2kb	4087193	down2kb	BNv1_01G00928	-	Basic-leucine zipper domain	basic leucine zipper 43-like [Cucumis sativus]
BN-HDR245	chr1	4028255	up2kb	4028854	exon1	CsaV3_1G006320.1	+		-	chr1	4096735	-	4096738	-	-	-		-
BN-CPL247	chr1	4122964	intron4	4123021	intron4	CsaV3_1G006480.1	+	Peptidase M1, membrane alanine aminopeptidase, N-terminal	transcription initiation factor TFIID subunit 2 [Cucumis sativus]	chr1	4191092	intron4	4191110	intron4	BNv1_01G00945	+	Peptidase M1, membrane alanine aminopeptidase, N-terminal	transcription initiation factor TFIID subunit 2 [Cucumis sativus]
BN-INS246	chr1	4120533	intron4	4120537	intron4	CsaV3_1G006480.1	+	Peptidase M1, membrane alanine aminopeptidase, N-terminal	transcription initiation factor TFIID subunit 2 [Cucumis sativus]	chr1	4188414	intron4	4188665	intron4	BNv1_01G00945	+	Peptidase M1, membrane alanine aminopeptidase, N-terminal	transcription initiation factor TFIID subunit 2 [Cucumis sativus]
BN-DEL248	chr1	4144899	down2kb	4145830	down2kb	CsaV3_1G006490.1	-	Transcription factor, TCP	transcription factor TCP18 [Arabidopsis thaliana]	chr1	4213067	down2kb	4213070	down2kb	BNv1_01G00946	-	Transcription factor, TCP	transcription factor TCP18 [Arabidopsis thaliana]
BN-TDM249	chr1	4163484	down2kb	4163565	down2kb	CsaV3_1G006500.1	-	Partial AB-hydrolase lipase domain	uncharacterized protein LOC101210904 isoform X1 [Cucumis sativus]	chr1	4230721	down2kb	4230773	down2kb	BNv1_01G00947	-	Partial AB-hydrolase lipase domain	uncharacterized protein LOC101210904 isoform X1 [Cucumis sativus]
BN-TDM249	chr1	4163484	intron1	4163565	intron1	CsaV3_1G006490.1	-	Transcription factor, TCP	transcription factor TCP18 [Arabidopsis thaliana]	chr1	4230721	-	4230773	-	-	-		-
BN-HDR251	chr1	4193051	up2kb	4193365	up2kb	CsaV3_1G006530.1	-	Peptidyl-tRNA hydrolase	peptidyl-tRNA hydrolase, chloroplastic isoform X1 [Cucumis sativus]	chr1	4260401	up2kb	4260955	up2kb	BNv1_01G00950	-	Peptidyl-tRNA hydrolase	peptidyl-tRNA hydrolase, chloroplastic isoform X1 [Cucumis sativus]
BN-HDR251	chr1	4193051	down2kb	4193365	down2kb	CsaV3_1G006540.1	-	DENN domain IPR001680	uncharacterized protein LOC100254135 isoform X1 [Vitis vinifera]	chr1	4260401	down2kb	4260955	down2kb	BNv1_01G00951	-	DENN domain IPR001680	uncharacterized protein LOC100254135 isoform X1 [Vitis vinifera]
BN-INS250	chr1	4188272	down2kb	4188273	down2kb	CsaV3_1G006530.1	-	Peptidyl-tRNA hydrolase	peptidyl-tRNA hydrolase, chloroplastic isoform X1 [Cucumis sativus]	chr1	4255452	down2kb	4255621	down2kb	BNv1_01G00950	-	Peptidyl-tRNA hydrolase	peptidyl-tRNA hydrolase, chloroplastic isoform X1 [Cucumis sativus]
BN-HDR253	chr1	4229398	up2kb	4229750	up2kb	CsaV3_1G006570.1	-		hypothetical protein PRUPE_ppa012428mg [Prunus persica]	chr1	4300492	up2kb	4300847	up2kb	BNv1_01G00953	-		hypothetical protein PRUPE_ppa012428mg [Prunus persica]
BN-HDR254	chr1	4239904	up2kb	4239994	up2kb	CsaV3_1G006580.1	-		-	chr1	4310961	up2kb	4311053	up2kb	BNv1_01G00954	-		-
BN-DUP4870	chr1	4348302	up2kb	4351885	intron	CsaV3_1G006780.1	-	Protein kinase domain	hypothetical protein PRUPE_ppa026138mg [Prunus persica]	chr3	20613915	-	20617485	-	-	-		-
BN-DUP4870	chr1	4348302	intron	4351885	down2kb	CsaV3_1G006790.1	-		-	chr3	20613915	-	20617485	-	-	-		-
BN-DUP4870	chr1	4348302	intron	4351885	down2kb	CsaV3_1G006800.1	-	Protein kinase domain IPR025287	probable serine/threonine-protein kinase At1g18390-like isoform X2 [Citrus sinensis]	chr3	20613915	-	20617485	-	-	-		-
BN-INVDP4096	chr1	4348302	up2kb	4351886	intron	CsaV3_1G006780.1	-	Protein kinase domain	hypothetical protein PRUPE_ppa026138mg [Prunus persica]	chr1	16311780	-	16315358	-	-	-		-
BN-INVDP4096	chr1	4348302	intron	4351886	down2kb	CsaV3_1G006790.1	-		-	chr1	16311780	-	16315358	-	-	-		-
BN-INVDP4096	chr1	4348302	intron	4351886	down2kb	CsaV3_1G006800.1	-	Protein kinase domain IPR025287	probable serine/threonine-protein kinase At1g18390-like isoform X2 [Citrus sinensis]	chr1	16311780	-	16315358	-	-	-		-
BN-DEL255	chr1	4467635	down2kb	4467754	down2kb	CsaV3_1G007050.1	-	Multicopper oxidase, type 1 IPR011706	laccase-1 [Vitis vinifera]	chr1	4538609	down2kb	4538612	down2kb	BNv1_01G00999	-	Multicopper oxidase, type 1 IPR011706	laccase-1 [Vitis vinifera]
BN-DEL255	chr1	4467635	-	4467754	-	-	-		-	chr1	4538609	intron1	4538612	intron1	BNv1_01G00998	-		-
BN-HDR256	chr1	4478053	up2kb	4478193	up2kb	CsaV3_1G007060.1	-	Protein kinase domain	hypothetical protein CICLE_v10007788mg [Citrus clementina]	chr1	4548932	up2kb	4549039	up2kb	BNv1_01G01000	-	Protein kinase domain	hypothetical protein CICLE_v10007788mg [Citrus clementina]
BN-HDR257	chr1	4508163	up2kb	4508170	up2kb	CsaV3_1G007110.1	+		EH domain-containing protein 1 [Cucumis sativus]	chr1	4579016	up2kb	4579096	up2kb	BNv1_01G01005	+		EH domain-containing protein 1 [Cucumis sativus]
BN-HDR257	chr1	4508163	up2kb	4508170	up2kb	CsaV3_1G007100.1	-	Thaumatin	Protein P21 [Cucumis sativus]	chr1	4579016	-	4579096	-	-	-		-
BN-INS258	chr1	4613831	down2kb	4613831	down2kb	CsaV3_1G007290.1	-	Zinc-finger domain of monoamine-oxidase A repressor R1	cell division cycle-associated protein 7 [Cucumis sativus]	chr1	4684624	-	4684746	-	-	-		-
BN-INS258	chr1	4613831	-	4613831	-	-	-		-	chr1	4684624	down2kb	4684746	down2kb	BNv1_01G01022	-		-
BN-HDR261	chr1	4802403	up2kb	4802481	up2kb	CsaV3_1G007540.1	-	Protein of unknown function DUF789	hypothetical protein CICLE_v10018551mg [Citrus clementina]	chr1	4873176	intron4	4873237	intron4	BNv1_01G01048	-	RNA polymerase archaeal subunit P/eukaryotic subunit RPABC4 IPR008507	hypothetical protein CICLE_v10018551mg [Citrus clementina]
BN-HDR261	chr1	4802403	down2kb	4802481	down2kb	CsaV3_1G007550.1	-	RNA polymerase archaeal subunit P/eukaryotic subunit RPABC4	hypothetical protein Csa_1G043180 [Cucumis sativus]	chr1	4873176	intron4	4873237	intron4	BNv1_01G01048	-	RNA polymerase archaeal subunit P/eukaryotic subunit RPABC4 IPR008507	hypothetical protein CICLE_v10018551mg [Citrus clementina]
BN-HDR262	chr1	4812519	intron1	4812565	intron1	CsaV3_1G007570.1	-	Proteinase inhibitor I3, Kunitz legume	Tumor-related protein [Cucumis sativus]	chr1	4883309	intron1	4883405	intron1	BNv1_01G01050	-	Proteinase inhibitor I3, Kunitz legume	Tumor-related protein [Cucumis sativus]
BN-HDR263	chr1	4817443	down2kb	4817480	down2kb	CsaV3_1G007580.1	-	CDT1 Geminin-binding domain-like IPR032054	hypothetical protein PRUPE_ppa025414mg, partial [Prunus persica]	chr1	4888288	down2kb	4888415	down2kb	BNv1_01G01051	-	CDT1 Geminin-binding domain-like IPR032054	hypothetical protein PRUPE_ppa025414mg, partial [Prunus persica]
BN-INS264	chr1	4818160	intron6	4818161	intron6	CsaV3_1G007580.1	-	CDT1 Geminin-binding domain-like IPR032054	hypothetical protein PRUPE_ppa025414mg, partial [Prunus persica]	chr1	4889099	intron6	4889449	intron6	BNv1_01G01051	-	CDT1 Geminin-binding domain-like IPR032054	hypothetical protein PRUPE_ppa025414mg, partial [Prunus persica]
BN-NOTAL11	chr1	4867096	up2kb	4867682	up2kb	CsaV3_1G007660.1	-	Calcineurin-like phosphoesterase domain, ApaH type	uncharacterized protein LOC101212697 isoform X1 [Cucumis sativus]	-	-	-	-	-	-	-		-
BN-NOTAL11	chr1	4867096	down2kb	4867682	down2kb	CsaV3_1G007670.1	-		-	-	-	-	-	-	-	-		-
BN-DUP4872	chr1	4867683	up2kb	4868188	up2kb	CsaV3_1G007660.1	-	Calcineurin-like phosphoesterase domain, ApaH type	uncharacterized protein LOC101212697 isoform X1 [Cucumis sativus]	chr4	11257459	-	11257961	-	-	-		-
BN-DUP4872	chr1	4867683	down2kb	4868188	down2kb	CsaV3_1G007670.1	-		-	chr4	11257459	-	11257961	-	-	-		-
BN-INVDP4871	chr1	4867683	up2kb	4868188	up2kb	CsaV3_1G007660.1	-	Calcineurin-like phosphoesterase domain, ApaH type	uncharacterized protein LOC101212697 isoform X1 [Cucumis sativus]	chr2	21306779	-	21307284	-	-	-		-
BN-INVDP4871	chr1	4867683	down2kb	4868188	down2kb	CsaV3_1G007670.1	-		-	chr2	21306779	-	21307284	-	-	-		-
BN-TRANS4873	chr1	4867683	up2kb	4868457	up2kb	CsaV3_1G007660.1	-	Calcineurin-like phosphoesterase domain, ApaH type	uncharacterized protein LOC101212697 isoform X1 [Cucumis sativus]	chr3	8015282	-	8016067	-	-	-		-
BN-TRANS4873	chr1	4867683	down2kb	4868457	down2kb	CsaV3_1G007670.1	-		-	chr3	8015282	-	8016067	-	-	-		-
BN-TRANS4873	chr1	4867683	-	4868457	-	-	-		-	chr3	8015282	up2kb	8016067	up2kb	BNv1_03G07393	+	tRNA (guanine-N-7) methyltransferase, Trmb type	tRNA (guanine-N(7)-)-methyltransferase [Cucumis sativus]
BN-HDR266	chr1	4878146	up2kb	4879802	intron	CsaV3_1G007680.1	-		uncharacterized protein LOC101209104 [Cucumis sativus]	chr1	4948381	up2kb	4950004	-	BNv1_01G01059	-		uncharacterized protein LOC101209104 [Cucumis sativus]
BN-HDR266	chr1	4878146	intron	4879802	down2kb	CsaV3_1G007690.1	-	Protein of unknown function DUF789	uncharacterized protein LOC102630953 [Citrus sinensis]	chr1	4948381	-	4950004	down2kb	BNv1_01G01060	-	Protein of unknown function DUF789	uncharacterized protein LOC102630953 [Citrus sinensis]
BN-CPL267	chr1	4880079	down2kb	4880129	down2kb	CsaV3_1G007690.1	-	Protein of unknown function DUF789	uncharacterized protein LOC102630953 [Citrus sinensis]	chr1	4950277	down2kb	4950303	down2kb	BNv1_01G01060	-	Protein of unknown function DUF789	uncharacterized protein LOC102630953 [Citrus sinensis]
BN-DEL271	chr1	4902520	down2kb	4902573	down2kb	CsaV3_1G007700.1	+	ABC transporter-like IPR013525	ABC transporter G family member 11 [Cucumis sativus]	chr1	4972469	down2kb	4972469	down2kb	BNv1_01G01061	+	ABC transporter-like IPR013525	ABC transporter G family member 11 [Cucumis sativus]
BN-DEL271	chr1	4902520	exon3	4902573	exon3	CsaV3_1G007710.1	-	Oxoglutarate/iron-dependent dioxygenase IPR026992	hypothetical protein VITISV_028513 [Vitis vinifera]	chr1	4972469	down2kb	4972469	down2kb	BNv1_01G01062	-	Oxoglutarate/iron-dependent dioxygenase IPR026992	hypothetical protein VITISV_028513 [Vitis vinifera]
BN-DEL271	chr1	4902520	down2kb	4902573	down2kb	CsaV3_1G007720.1	+	Ribosomal protein S12/S23	hypothetical protein AMTR_s02071p00004290 [Amborella trichopoda]	chr1	4972469	-	4972469	-	-	-		-
BN-INS270	chr1	4899538	intron6	4899539	intron6	CsaV3_1G007700.1	+	ABC transporter-like IPR013525	ABC transporter G family member 11 [Cucumis sativus]	chr1	4969427	intron6	4969483	intron6	BNv1_01G01061	+	ABC transporter-like IPR013525	ABC transporter G family member 11 [Cucumis sativus]
BN-HDR272	chr1	4905073	up2kb	4905378	up2kb	CsaV3_1G007710.1	-	Oxoglutarate/iron-dependent dioxygenase IPR026992	hypothetical protein VITISV_028513 [Vitis vinifera]	chr1	4974974	up2kb	4974998	up2kb	BNv1_01G01062	-	Oxoglutarate/iron-dependent dioxygenase IPR026992	hypothetical protein VITISV_028513 [Vitis vinifera]
BN-DEL273	chr1	4942498	up2kb	4942556	up2kb	CsaV3_1G007810.1	-	Polysaccharide biosynthesis domain	glucuronoxylan 4-O-methyltransferase 1-like [Cucumis sativus]	chr1	5012156	up2kb	5012157	up2kb	BNv1_01G01071	-	Polysaccharide biosynthesis domain	glucuronoxylan 4-O-methyltransferase 1-like [Cucumis sativus]
BN-DEL275	chr1	4978773	down2kb	4978839	down2kb	CsaV3_1G007870.1	-	WRKY domain	probable WRKY transcription factor 61 [Cucumis sativus]	chr1	5048373	down2kb	5048373	down2kb	BNv1_01G01077	-	WRKY domain	probable WRKY transcription factor 61 [Cucumis sativus]
BN-HDR276	chr1	5054342	down2kb	5054394	down2kb	CsaV3_1G007990.1	-	DnaJ domain IPR002939	dnaJ homolog subfamily B member 13 [Cucumis sativus]	chr1	5123877	down2kb	5123939	down2kb	BNv1_01G01090	-	DnaJ domain IPR002939	dnaJ homolog subfamily B member 13 [Cucumis sativus]
BN-HDR277	chr1	5059304	up2kb	5059425	up2kb	CsaV3_1G007990.1	-	DnaJ domain IPR002939	dnaJ homolog subfamily B member 13 [Cucumis sativus]	chr1	5128827	up2kb	5128991	up2kb	BNv1_01G01090	-	DnaJ domain IPR002939	dnaJ homolog subfamily B member 13 [Cucumis sativus]
BN-HDR277	chr1	5059304	down2kb	5059425	down2kb	CsaV3_1G008000.1	-	Protein kinase domain IPR002048	calcium-dependent protein kinase 10 [Cucumis sativus]	chr1	5128827	-	5128991	down2kb	BNv1_01G01091	-	Protein kinase domain IPR002048	calcium-dependent protein kinase 10 [Cucumis sativus]
BN-HDR278	chr1	5060558	exon7	5060578	exon7	CsaV3_1G008000.1	-	Protein kinase domain IPR002048	calcium-dependent protein kinase 10 [Cucumis sativus]	chr1	5130114	down2kb	5130225	down2kb	BNv1_01G01091	-	Protein kinase domain IPR002048	calcium-dependent protein kinase 10 [Cucumis sativus]
BN-HDR278	chr1	5060558	up2kb	5060578	up2kb	CsaV3_1G007990.1	-	DnaJ domain IPR002939	dnaJ homolog subfamily B member 13 [Cucumis sativus]	chr1	5130114	-	5130225	-	-	-		-
BN-TRANS5998	chr2	13815587	-	13819133	-	-	-		-	chr1	560647	down2kb	564193	-	BNv1_01G00388	+	Domain of unknown function DUF4110	kelch domain-containing protein 4 [Cucumis sativus]
BN-TRANS5998	chr2	13815587	-	13819133	-	-	-		-	chr1	560647	-	564193	up2kb	BNv1_01G00389	+		uncharacterized protein LOC101218367 [Cucumis sativus]
BN-INVDP7678	chr5	9856267	-	9856536	-	-	-		-	chr1	996433	intron54	996702	intron54	BNv1_01G00452	+	Phosphatidylinositol 3-/4-kinase, catalytic domain IPR003152	Ataxia telangiectasia mutated, putative [Theobroma cacao]
BN-INVDP7897	chr5	15027389	-	15027658	-	-	-		-	chr1	996433	intron54	996703	intron54	BNv1_01G00452	+	Phosphatidylinositol 3-/4-kinase, catalytic domain IPR003152	Ataxia telangiectasia mutated, putative [Theobroma cacao]
BN-TRANS1817	chr1	6877245	-	6877515	-	-	-		-	chr1	996433	intron54	996703	intron54	BNv1_01G00452	+	Phosphatidylinositol 3-/4-kinase, catalytic domain IPR003152	Ataxia telangiectasia mutated, putative [Theobroma cacao]
BN-NOTAL1060	-	-	-	-	-	-	-		-	chr1	2440281	up2kb	2440843	-	BNv1_01G00687	-	Protein of unknown function DUF1666	uncharacterized protein LOC101203868 [Cucumis sativus]
BN-HDR134	chr1	2613237	-	2613368	-	-	-		-	chr1	2677372	up2kb	2677827	up2kb	BNv1_01G00722	-	Multi antimicrobial extrusion protein	MATE efflux family protein 6-like [Fragaria vesca subsp. vesca]
BN-HDR134	chr1	2613237	-	2613368	-	-	-		-	chr1	2677372	down2kb	2677827	down2kb	BNv1_01G00723	-	Multi antimicrobial extrusion protein	MATE efflux family protein 6-like [Fragaria vesca subsp. vesca]
BN-HDR135	chr1	2619897	-	2620016	-	-	-		-	chr1	2684351	up2kb	2684749	up2kb	BNv1_01G00723	-	Multi antimicrobial extrusion protein	MATE efflux family protein 6-like [Fragaria vesca subsp. vesca]
BN-CPG168	chr1	2888309	-	2888323	-	-	-		-	chr1	2954653	up2kb	2954723	up2kb	BNv1_01G00759	-	Strictosidine synthase, conserved region	protein STRICTOSIDINE SYNTHASE-LIKE 3 [Cucumis sativus]
BN-NOTAL1066	-	-	-	-	-	-	-		-	chr1	3107423	down2kb	3107824	down2kb	BNv1_01G00781	-	B3 DNA binding domain	High-level expression of sugar-inducible gene 2, putative isoform 1 [Theobroma cacao]
BN-INVDP6401	chr2	22145978	-	22146666	-	-	-		-	chr1	3106521	-	3107208	down2kb	BNv1_01G00781	-	B3 DNA binding domain	High-level expression of sugar-inducible gene 2, putative isoform 1 [Theobroma cacao]
BN-INVTR2188	chr1	24731687	-	24732591	-	-	-		-	chr1	3106521	-	3107422	down2kb	BNv1_01G00781	-	B3 DNA binding domain	High-level expression of sugar-inducible gene 2, putative isoform 1 [Theobroma cacao]
BN-HDR196	chr1	3159107	-	3159155	-	-	-		-	chr1	3224692	intron5	3224784	intron5	BNv1_01G00788	+		-
BN-NOTAL1068	-	-	-	-	-	-	-		-	chr1	3385401	intron1	3387919	intron1	BNv1_01G00799	-	DnaJ domain	hypothetical protein PRUPE_ppa027015mg, partial [Prunus persica]
BN-NOTAL1069	-	-	-	-	-	-	-		-	chr1	3388491	intron1	3389766	intron1	BNv1_01G00799	-	DnaJ domain	hypothetical protein PRUPE_ppa027015mg, partial [Prunus persica]
BN-NOTAL1069	-	-	-	-	-	-	-		-	chr1	3388491	-	3389766	down2kb	BNv1_01G00800	-	Multicopper oxidase, type 1 IPR011706	L-ascorbate oxidase homolog [Cucumis sativus]
BN-NOTAL1071	-	-	-	-	-	-	-		-	chr1	4937875	up2kb	4938716	up2kb	BNv1_01G01057	-	Calcineurin-like phosphoesterase domain, ApaH type	uncharacterized protein LOC101212697 isoform X1 [Cucumis sativus]
BN-NOTAL1071	-	-	-	-	-	-	-		-	chr1	4937875	up2kb	4938716	up2kb	BNv1_01G01058	+	Pentatricopeptide repeat	pentatricopeptide repeat-containing protein At3g12770 [Cucumis sativus]
BN-DUP6512	chr3	14533040	up2kb	14533848	up2kb	CsaV3_3G018840.1	+	6-phosphogluconate dehydrogenase, NADP-binding IPR029154	hypothetical protein PRUPE_ppa009081mg [Prunus persica]	chr4	8926693	-	8927510	-	-	-		-
BN-DUP6512	chr3	14533040	-	14533848	-	-	-		-	chr4	8926693	-	8927510	up2kb	BNv1_04G11972	+		-
BN-NOTAL370	chr3	14532352	intron	14533039	up2kb	CsaV3_3G018840.1	+	6-phosphogluconate dehydrogenase, NADP-binding IPR029154	hypothetical protein PRUPE_ppa009081mg [Prunus persica]	-	-	-	-	-	-	-		-
BN-HDR3882	chr3	14543805	intron	14544035	up2kb	CsaV3_3G018860.1	+	GOLD domain	transmembrane emp24 domain-containing protein p24delta3 [Cucumis sativus]	chr3	14488401	-	14488683	-	-	-		-
BN-DEL3884	chr3	14586356	up2kb	14586493	up2kb	CsaV3_3G018930.1	+	Plant self-incompatibility S1	uncharacterized protein LOC101207655 [Cucumis sativus]	chr3	14531011	up2kb	14531014	up2kb	BNv1_03G08253	+	Plant self-incompatibility S1	uncharacterized protein LOC101207655 [Cucumis sativus]
BN-HDR3883	chr3	14585533	up2kb	14585737	up2kb	CsaV3_3G018930.1	+	Plant self-incompatibility S1	uncharacterized protein LOC101207655 [Cucumis sativus]	chr3	14530114	up2kb	14530389	up2kb	BNv1_03G08253	+	Plant self-incompatibility S1	uncharacterized protein LOC101207655 [Cucumis sativus]
BN-NOTAL372	chr3	14607091	intron	14609359	down2kb	CsaV3_3G018950.1	-		-	-	-	-	-	-	-	-		-
BN-CPL3888	chr3	14610961	up2kb	14611163	up2kb	CsaV3_3G018950.1	-		-	chr3	14552259	-	14552272	-	-	-		-
BN-CPG3889	chr3	14618392	up2kb	14618439	up2kb	CsaV3_3G018960.1	-	Phytocyanin domain	basic blue protein-like [Cucumis sativus]	chr3	14559481	up2kb	14559577	up2kb	BNv1_03G08255	-	Phytocyanin domain	basic blue protein-like [Cucumis sativus]
BN-CPG3891	chr3	14641629	up2kb	14641686	up2kb	CsaV3_3G018980.1	+	Rhodanese-like domain	thiosulfate/3-mercaptopyruvate sulfurtransferase 1, mitochondrial-like isoform X1 [Cucumis sativus]	chr3	14582592	up2kb	14582707	up2kb	BNv1_03G08257	+	Rhodanese-like domain	thiosulfate/3-mercaptopyruvate sulfurtransferase 1, mitochondrial-like isoform X1 [Cucumis sativus]
BN-CPG3891	chr3	14641629	down2kb	14641686	intron	CsaV3_3G018970.1	+	Pentatricopeptide repeat IPR032867	pentatricopeptide repeat-containing protein At3g24000, mitochondrial isoform X2 [Cucumis sativus]	chr3	14582592	-	14582707	-	-	-		-
BN-HDR3890	chr3	14630286	up2kb	14630371	up2kb	CsaV3_3G018970.1	+	Pentatricopeptide repeat IPR032867	pentatricopeptide repeat-containing protein At3g24000, mitochondrial isoform X2 [Cucumis sativus]	chr3	14571330	up2kb	14571339	up2kb	BNv1_03G08256	+	Pentatricopeptide repeat IPR032867	pentatricopeptide repeat-containing protein At3g24000, mitochondrial isoform X2 [Cucumis sativus]
BN-HDR3892	chr3	14642513	up2kb	14642583	up2kb	CsaV3_3G018980.1	+	Rhodanese-like domain	thiosulfate/3-mercaptopyruvate sulfurtransferase 1, mitochondrial-like isoform X1 [Cucumis sativus]	chr3	14583530	up2kb	14583587	up2kb	BNv1_03G08257	+	Rhodanese-like domain	thiosulfate/3-mercaptopyruvate sulfurtransferase 1, mitochondrial-like isoform X1 [Cucumis sativus]
BN-HDR3893	chr3	14653518	intron1	14653602	intron1	CsaV3_3G018990.1	+	Ribosomal protein S9	40S ribosomal protein S16 [Cucumis sativus]	chr3	14594503	up2kb	14594504	up2kb	BNv1_03G08258	+	Ribosomal protein S9	40S ribosomal protein S16 [Cucumis sativus]
BN-HDR3894	chr3	14667682	down2kb	14667882	down2kb	CsaV3_3G019010.1	+	Nucleolar complex protein 2	Nucleolar complex protein 2 isoform 1 [Theobroma cacao]	chr3	14608630	down2kb	14608784	down2kb	BNv1_03G08260	+	Nucleolar complex protein 2	Nucleolar complex protein 2 isoform 1 [Theobroma cacao]
BN-HDR3898	chr3	14733620	exon1	14733960	up2kb	CsaV3_3G019060.1	-	Cupin 1	legumin J [Cucumis sativus]	chr3	14673562	up2kb	14673714	up2kb	BNv1_03G08265	-	Cupin 1	legumin J [Cucumis sativus]
BN-HDR3897	chr3	14731807	down2kb	14731871	down2kb	CsaV3_3G019060.1	-	Cupin 1	legumin J [Cucumis sativus]	chr3	14671765	down2kb	14671814	down2kb	BNv1_03G08265	-	Cupin 1	legumin J [Cucumis sativus]
BN-HDR3900	chr3	14767738	intron3	14768282	intron3	CsaV3_3G019080.1	+	DNA-directed RNA polymerase, insert domain	RNA polymerase alpha subunit [Cucumis sativus]	chr3	14703130	-	14703329	-	-	-		-
BN-INS3902	chr3	14793282	down2kb	14793284	down2kb	CsaV3_3G019100.1	+	Bet v I/Major latex protein	kirola [Cucumis sativus]	chr3	14728283	down2kb	14728517	down2kb	BNv1_03G08268	+	Bet v I/Major latex protein	kirola [Cucumis sativus]
BN-INVDP6516	chr3	14793667	down2kb	14793972	down2kb	CsaV3_3G019100.1	+	Bet v I/Major latex protein	kirola [Cucumis sativus]	chr6	18687931	-	18688236	-	-	-		-
BN-INVDP6517	chr3	14793773	down2kb	14794739	intron	CsaV3_3G019100.1	+	Bet v I/Major latex protein	kirola [Cucumis sativus]	chr2	13102012	-	13102991	-	-	-		-
BN-CPL3908	chr3	14834191	intron13	14834272	intron13	CsaV3_3G019120.1	+	Membralin	uncharacterized protein LOC101205453 [Cucumis sativus]	chr3	14769407	intron13	14769446	intron13	BNv1_03G08270	+	Membralin	uncharacterized protein LOC101205453 [Cucumis sativus]
BN-CPL3908	chr3	14834191	up2kb	14834272	up2kb	CsaV3_3G019130.1	+		-	chr3	14769407	-	14769446	up2kb	BNv1_03G08271	+		-
BN-HDR3906	chr3	14825510	intron4	14825681	intron4	CsaV3_3G019120.1	+	Membralin	uncharacterized protein LOC101205453 [Cucumis sativus]	chr3	14760566	intron4	14760808	intron4	BNv1_03G08270	+	Membralin	uncharacterized protein LOC101205453 [Cucumis sativus]
BN-INS3907	chr3	14834008	intron13	14834008	intron13	CsaV3_3G019120.1	+	Membralin	uncharacterized protein LOC101205453 [Cucumis sativus]	chr3	14769145	intron13	14769221	intron13	BNv1_03G08270	+	Membralin	uncharacterized protein LOC101205453 [Cucumis sativus]
BN-INS3907	chr3	14834008	up2kb	14834008	up2kb	CsaV3_3G019130.1	+		-	chr3	14769145	-	14769221	-	-	-		-
BN-DEL3916	chr3	14931748	intron2	14931798	intron2	CsaV3_3G019180.1	-	Serine hydroxymethyltransferase	serine hydroxymethyltransferase 7-like [Cucumis sativus]	chr3	14866289	intron2	14866290	intron2	BNv1_03G08276	-	Serine hydroxymethyltransferase	serine hydroxymethyltransferase 7-like [Cucumis sativus]
BN-HDR3917	chr3	14946509	intron12	14946514	intron12	CsaV3_3G019190.1	-	Helicase, C-terminal IPR002121	hypothetical protein PRUPE_ppa000416mg [Prunus persica]	chr3	14882401	-	14882868	-	-	-		-
BN-HDR3918	chr3	14960984	up2kb	14961423	up2kb	CsaV3_3G019190.1	-	Helicase, C-terminal IPR002121	hypothetical protein PRUPE_ppa000416mg [Prunus persica]	chr3	14897333	intron1	14897662	intron1	BNv1_03G08277	-	DEAD/DEAH box helicase domain	hypothetical protein PRUPE_ppa000416mg [Prunus persica]
BN-NOTAL377	chr3	14962083	up2kb	14962211	intron	CsaV3_3G019190.1	-	Helicase, C-terminal IPR002121	hypothetical protein PRUPE_ppa000416mg [Prunus persica]	-	-	-	-	-	-	-		-
BN-DUP6520	chr3	15005706	intron7	15011043	intron7	CsaV3_3G019230.1	-	Mlo-related protein	MLO-like protein 4 [Cucumis sativus]	chr4	10363001	-	10368344	-	-	-		-
BN-DUP6520	chr3	15005706	-	15011043	-	-	-		-	chr4	10363001	intron3	10368344	intron3	BNv1_04G12068	+	Protein kinase domain	cell division control protein 2 homolog C-like [Malus domestica]
BN-TRANS6519	chr3	15005706	intron7	15009965	intron7	CsaV3_3G019230.1	-	Mlo-related protein	MLO-like protein 4 [Cucumis sativus]	chr5	15234310	-	15238523	-	-	-		-
BN-DEL3925	chr3	15057655	down2kb	15057998	down2kb	CsaV3_3G019260.1	+	Mg2+ transporter protein, CorA-like/Zinc transport protein ZntB	magnesium transporter MRS2-4 [Cucumis sativus]	chr3	14980680	down2kb	14980681	down2kb	BNv1_03G08285	+	Mg2+ transporter protein, CorA-like/Zinc transport protein ZntB	magnesium transporter MRS2-4 [Cucumis sativus]
BN-NOTAL379	chr3	15042604	intron3	15042726	intron3	CsaV3_3G019260.1	+	Mg2+ transporter protein, CorA-like/Zinc transport protein ZntB	magnesium transporter MRS2-4 [Cucumis sativus]	-	-	-	-	-	-	-		-
BN-HDR3923	chr3	15055106	intron4	15055337	intron4	CsaV3_3G019260.1	+	Mg2+ transporter protein, CorA-like/Zinc transport protein ZntB	magnesium transporter MRS2-4 [Cucumis sativus]	chr3	14977944	intron3	14978385	intron3	BNv1_03G08285	+	Mg2+ transporter protein, CorA-like/Zinc transport protein ZntB	magnesium transporter MRS2-4 [Cucumis sativus]
BN-HDR3926	chr3	15058704	down2kb	15059407	intron	CsaV3_3G019260.1	+	Mg2+ transporter protein, CorA-like/Zinc transport protein ZntB	magnesium transporter MRS2-4 [Cucumis sativus]	chr3	14981408	down2kb	14982391	-	BNv1_03G08285	+	Mg2+ transporter protein, CorA-like/Zinc transport protein ZntB	magnesium transporter MRS2-4 [Cucumis sativus]
BN-INVDP4383	chr3	15042727	intron3	15048015	intron3	CsaV3_3G019260.1	+	Mg2+ transporter protein, CorA-like/Zinc transport protein ZntB	magnesium transporter MRS2-4 [Cucumis sativus]	chr3	16029938	-	16035226	-	-	-		-
BN-INVDP4383	chr3	15042727	-	15048015	-	-	-		-	chr3	16029938	intron5	16035226	intron5	BNv1_03G08373	-	Root UVB sensitive family	Uncharacterized protein isoform 1 [Theobroma cacao]
BN-HDR3930	chr3	15085760	intron4	15085955	intron4	CsaV3_3G019280.1	-	COBRA, plant	hypothetical protein PRUPE_ppa022902mg [Prunus persica]	chr3	15008768	intron3	15008773	intron3	BNv1_03G08288	-	COBRA, plant	hypothetical protein PRUPE_ppa022902mg [Prunus persica]
BN-HDR3935	chr3	15120288	intron1	15120383	intron1	CsaV3_3G019300.1	+	Mature-T-Cell Proliferation I type	cx9C motif-containing protein 4 [Cucumis sativus]	chr3	15039774	intron1	15039774	intron1	BNv1_03G08291	+	Mature-T-Cell Proliferation I type	cx9C motif-containing protein 4 [Cucumis sativus]
BN-HDR3935	chr3	15120288	down2kb	15120383	down2kb	CsaV3_3G019310.1	-	Magnesium transporter NIPA	probable magnesium transporter NIPA4 [Cucumis sativus]	chr3	15039774	-	15039774	-	-	-		-
BN-CPL3939	chr3	15167112	intron24	15167342	exon24	CsaV3_3G019320.1	-	Helicase, C-terminal IPR007502	hypothetical protein PRUPE_ppa000230mg [Prunus persica]	chr3	15087032	intron24	15087050	exon24	BNv1_03G08293	-	Helicase, C-terminal IPR007502	hypothetical protein PRUPE_ppa000230mg [Prunus persica]
BN-DEL3940	chr3	15171484	intron21	15176416	intron21	CsaV3_3G019320.1	-	Helicase, C-terminal IPR007502	hypothetical protein PRUPE_ppa000230mg [Prunus persica]	chr3	15091181	intron21	15091184	intron21	BNv1_03G08293	-	Helicase, C-terminal IPR007502	hypothetical protein PRUPE_ppa000230mg [Prunus persica]
BN-DEL3940	chr3	15171484	up2kb	15176416	intron	CsaV3_3G019330.1	-		-	chr3	15091181	-	15091184	-	-	-		-
BN-HDR3938	chr3	15150982	down2kb	15151117	down2kb	CsaV3_3G019320.1	-	Helicase, C-terminal IPR007502	hypothetical protein PRUPE_ppa000230mg [Prunus persica]	chr3	15070319	down2kb	15071046	down2kb	BNv1_03G08293	-	Helicase, C-terminal IPR007502	hypothetical protein PRUPE_ppa000230mg [Prunus persica]
BN-NOTAL382	chr3	15208161	intron9	15208379	intron9	CsaV3_3G019320.1	-	Helicase, C-terminal IPR007502	hypothetical protein PRUPE_ppa000230mg [Prunus persica]	-	-	-	-	-	-	-		-
BN-CPG3941	chr3	15217916	intron7	15217928	intron7	CsaV3_3G019320.1	-	Helicase, C-terminal IPR007502	hypothetical protein PRUPE_ppa000230mg [Prunus persica]	chr3	15133827	intron7	15135016	intron7	BNv1_03G08293	-	Helicase, C-terminal IPR007502	hypothetical protein PRUPE_ppa000230mg [Prunus persica]
BN-HDR3937	chr3	15150045	down2kb	15150334	down2kb	CsaV3_3G019320.1	-	Helicase, C-terminal IPR007502	hypothetical protein PRUPE_ppa000230mg [Prunus persica]	chr3	15069383	-	15069669	-	-	-		-
BN-HDR3942	chr3	15221166	intron7	15221536	intron7	CsaV3_3G019320.1	-	Helicase, C-terminal IPR007502	hypothetical protein PRUPE_ppa000230mg [Prunus persica]	chr3	15138257	intron7	15138262	intron7	BNv1_03G08293	-	Helicase, C-terminal IPR007502	hypothetical protein PRUPE_ppa000230mg [Prunus persica]
BN-INS3944	chr3	15243306	up2kb	15243309	up2kb	CsaV3_3G019320.1	-	Helicase, C-terminal IPR007502	hypothetical protein PRUPE_ppa000230mg [Prunus persica]	chr3	15160707	up2kb	15160962	up2kb	BNv1_03G08293	-	Helicase, C-terminal IPR007502	hypothetical protein PRUPE_ppa000230mg [Prunus persica]
BN-TRANS1913	chr3	15207891	intron9	15208160	intron9	CsaV3_3G019320.1	-	Helicase, C-terminal IPR007502	hypothetical protein PRUPE_ppa000230mg [Prunus persica]	chr3	15916682	-	15916951	-	-	-		-
BN-TRANS1913	chr3	15207891	-	15208160	-	-	-		-	chr3	15916682	intron16	15916951	intron16	BNv1_03G08370	+	AMP-dependent synthetase/ligase IPR025110	acetyl-coenzyme A synthetase, chloroplastic/glyoxysomal isoform X1 [Cucumis sativus]
BN-TRANS6522	chr3	15208380	intron9	15213402	intron9	CsaV3_3G019320.1	-	Helicase, C-terminal IPR007502	hypothetical protein PRUPE_ppa000230mg [Prunus persica]	chr2	16949998	-	16955009	-	-	-		-
BN-TRANS6522	chr3	15208380	intron	15213402	up2kb	CsaV3_3G019340.1	+	Ribosomal protein L30, ferredoxin-like fold domain	Ribosomal protein L30/L7 family protein isoform 1 [Theobroma cacao]	chr2	16949998	-	16955009	-	-	-		-
BN-CPL3945	chr3	15244628	down2kb	15244836	down2kb	CsaV3_3G019360.1	-	Hyccin	uncharacterized protein LOC101210037 [Cucumis sativus]	chr3	15162317	-	15162387	-	-	-		-
BN-HDR3946	chr3	15251948	intron1	15252285	up2kb	CsaV3_3G019370.1	-		-	chr3	15169459	up2kb	15169703	up2kb	BNv1_03G08295	-		-
BN-DEL3948	chr3	15256412	intron	15257104	down2kb	CsaV3_3G019380.1	-	Leucine-rich repeat-containing N-terminal, plant-type	hypothetical protein PRUPE_ppa017031mg, partial [Prunus persica]	chr3	15173798	down2kb	15173800	down2kb	BNv1_03G08296	-	Leucine-rich repeat IPR013210	hypothetical protein PRUPE_ppa017031mg, partial [Prunus persica]
BN-CPL3953	chr3	15293726	down2kb	15293781	down2kb	CsaV3_3G019390.1	-	Heavy metal-associated domain, HMA	heavy metal-associated isoprenylated plant protein 26 [Cucumis sativus]	chr3	15194081	down2kb	15194087	down2kb	BNv1_03G08297	-	Heavy metal-associated domain, HMA	heavy metal-associated isoprenylated plant protein 26 [Cucumis sativus]
BN-CPL3954	chr3	15295139	down2kb	15295306	down2kb	CsaV3_3G019390.1	-	Heavy metal-associated domain, HMA	heavy metal-associated isoprenylated plant protein 26 [Cucumis sativus]	chr3	15195427	down2kb	15195507	down2kb	BNv1_03G08297	-	Heavy metal-associated domain, HMA	heavy metal-associated isoprenylated plant protein 26 [Cucumis sativus]
BN-DEL3955	chr3	15298173	up2kb	15298237	up2kb	CsaV3_3G019390.1	-	Heavy metal-associated domain, HMA	heavy metal-associated isoprenylated plant protein 26 [Cucumis sativus]	chr3	15198372	up2kb	15198372	up2kb	BNv1_03G08297	-	Heavy metal-associated domain, HMA	heavy metal-associated isoprenylated plant protein 26 [Cucumis sativus]
BN-DEL3955	chr3	15298173	-	15298237	-	-	-		-	chr3	15198372	up2kb	15198372	up2kb	BNv1_03G08298	+		-
BN-CPG3958	chr3	15310301	down2kb	15310306	down2kb	CsaV3_3G019400.1	+	Leucine-rich repeat-containing N-terminal, plant-type	hypothetical protein Csa_3G232435 [Cucumis sativus]	chr3	15210374	down2kb	15210438	down2kb	BNv1_03G08299	+	Leucine-rich repeat IPR013210	hypothetical protein Csa_3G232435 [Cucumis sativus]
BN-CPG3958	chr3	15310301	-	15310306	-	-	-		-	chr3	15210374	up2kb	15210438	up2kb	BNv1_03G08300	+	Leucine-rich repeat	hypothetical protein PHAVU_004G100300g [Phaseolus vulgaris]
BN-CPL3957	chr3	15306862	up2kb	15306998	up2kb	CsaV3_3G019400.1	+	Leucine-rich repeat-containing N-terminal, plant-type	hypothetical protein Csa_3G232435 [Cucumis sativus]	chr3	15207012	up2kb	15207056	up2kb	BNv1_03G08299	+	Leucine-rich repeat IPR013210	hypothetical protein Csa_3G232435 [Cucumis sativus]
BN-NOTAL386	chr3	15316846	intron	15318564	down2kb	CsaV3_3G019410.1	-		uncharacterized protein LOC101222658 [Cucumis sativus]	-	-	-	-	-	-	-		-
BN-INS3963	chr3	15376043	up2kb	15376043	up2kb	CsaV3_3G019470.1	-	Class II aldolase/adducin N-terminal	Full=2,3-diketo-5-methylthio-1-phosphopentane phosphatase [Vitis vinifera]	chr3	15269460	up2kb	15269520	up2kb	BNv1_03G08307	-	Class II aldolase/adducin N-terminal	Full=2,3-diketo-5-methylthio-1-phosphopentane phosphatase [Vitis vinifera]
BN-INS3963	chr3	15376043	down2kb	15376043	down2kb	CsaV3_3G019480.1	-	Multi antimicrobial extrusion protein	MATE efflux family protein LAL5-like isoform X2 [Fragaria vesca subsp. vesca]	chr3	15269460	down2kb	15269520	down2kb	BNv1_03G08308	-	Multi antimicrobial extrusion protein	aberrant lateral root formation 1 family protein [Populus trichocarpa]
BN-HDR3964	chr3	15378729	up2kb	15378998	up2kb	CsaV3_3G019480.1	-	Multi antimicrobial extrusion protein	MATE efflux family protein LAL5-like isoform X2 [Fragaria vesca subsp. vesca]	chr3	15272216	intron1	15272737	intron1	BNv1_03G08308	-	Multi antimicrobial extrusion protein	aberrant lateral root formation 1 family protein [Populus trichocarpa]
BN-HDR3964	chr3	15378729	intron1	15378998	up2kb	CsaV3_3G019490.1	-	Multi antimicrobial extrusion protein	hypothetical protein POPTR_0131s00220g [Populus trichocarpa]	chr3	15272216	intron1	15272737	intron1	BNv1_03G08308	-	Multi antimicrobial extrusion protein	aberrant lateral root formation 1 family protein [Populus trichocarpa]
BN-INS3965	chr3	15380072	up2kb	15380072	up2kb	CsaV3_3G019490.1	-	Multi antimicrobial extrusion protein	hypothetical protein POPTR_0131s00220g [Populus trichocarpa]	chr3	15273808	up2kb	15275195	up2kb	BNv1_03G08308	-	Multi antimicrobial extrusion protein	aberrant lateral root formation 1 family protein [Populus trichocarpa]
BN-HDR3966	chr3	15381399	intron	15382463	down2kb	CsaV3_3G019500.1	-	3-hydroxyacyl-CoA dehydrogenase, C-terminal IPR006176	hydroxyacyl-coenzyme A dehydrogenase, mitochondrial [Cucumis sativus]	chr3	15276521	-	15276884	down2kb	BNv1_03G08309	-	3-hydroxyacyl-CoA dehydrogenase, C-terminal IPR006176	hydroxyacyl-coenzyme A dehydrogenase, mitochondrial [Cucumis sativus]
BN-HDR3967	chr3	15388547	up2kb	15388698	up2kb	CsaV3_3G019500.1	-	3-hydroxyacyl-CoA dehydrogenase, C-terminal IPR006176	hydroxyacyl-coenzyme A dehydrogenase, mitochondrial [Cucumis sativus]	chr3	15282955	up2kb	15283100	up2kb	BNv1_03G08309	-	3-hydroxyacyl-CoA dehydrogenase, C-terminal IPR006176	hydroxyacyl-coenzyme A dehydrogenase, mitochondrial [Cucumis sativus]
BN-HDR3970	chr3	15401377	up2kb	15402439	up2kb	CsaV3_3G019510.1	-	Ribosomal protein L33	unknown [Picea sitchensis]	chr3	15295899	up2kb	15297438	up2kb	BNv1_03G08311	-	Ribosomal protein L33	unknown [Picea sitchensis]
BN-HDR3970	chr3	15401377	down2kb	15402439	intron	CsaV3_3G019520.1	+	Protein kinase domain IPR001611	phytosulfokine receptor 2 [Cucumis sativus]	chr3	15295899	-	15297438	-	-	-		-
BN-INS3969	chr3	15401100	intron1	15401100	intron1	CsaV3_3G019510.1	-	Ribosomal protein L33	unknown [Picea sitchensis]	chr3	15295559	intron1	15295621	intron1	BNv1_03G08311	-	Ribosomal protein L33	unknown [Picea sitchensis]
BN-INS3969	chr3	15401100	down2kb	15401100	down2kb	CsaV3_3G019520.1	+	Protein kinase domain IPR001611	phytosulfokine receptor 2 [Cucumis sativus]	chr3	15295559	down2kb	15295621	down2kb	BNv1_03G08310	+	Protein kinase domain IPR001611	phytosulfokine receptor 2 [Cucumis sativus]
BN-DEL3971	chr3	15404628	intron	15405430	down2kb	CsaV3_3G019530.1	-	NAC domain	hypothetical protein PRUPE_ppa026810mg [Prunus persica]	chr3	15299640	down2kb	15299643	down2kb	BNv1_03G08312	-	NAC domain	hypothetical protein PRUPE_ppa026810mg [Prunus persica]
BN-HDR3972	chr3	15409434	intron2	15409542	intron2	CsaV3_3G019530.1	-	NAC domain	hypothetical protein PRUPE_ppa026810mg [Prunus persica]	chr3	15303620	intron2	15303704	intron2	BNv1_03G08312	-	NAC domain	hypothetical protein PRUPE_ppa026810mg [Prunus persica]
BN-CPG3973	chr3	15451462	down2kb	15451487	down2kb	CsaV3_3G019550.1	+	UDP-glucuronosyl/UDP-glucosyltransferase	UDP-glycosyltransferase 79B6-like [Cucumis sativus]	chr3	15345604	down2kb	15345664	down2kb	BNv1_03G08314	+	UDP-glucuronosyl/UDP-glucosyltransferase	UDP-glycosyltransferase 79B6-like [Cucumis sativus]
BN-HDR3975	chr3	15455135	up2kb	15455244	up2kb	CsaV3_3G019560.1	+		hypothetical protein PRUPE_ppa014990mg [Prunus persica]	chr3	15349345	up2kb	15349501	up2kb	BNv1_03G08315	+		hypothetical protein PRUPE_ppa014990mg [Prunus persica]
BN-INS3977	chr3	15457601	intron1	15457601	intron1	CsaV3_3G019560.1	+		hypothetical protein PRUPE_ppa014990mg [Prunus persica]	chr3	15351878	intron1	15351927	intron1	BNv1_03G08315	+		hypothetical protein PRUPE_ppa014990mg [Prunus persica]
BN-HDR3978	chr3	15473383	up2kb	15473386	up2kb	CsaV3_3G019580.1	-		hypothetical protein PRUPE_ppa001903mg [Prunus persica]	chr3	15367710	up2kb	15367774	up2kb	BNv1_03G08317	-		hypothetical protein PRUPE_ppa001903mg [Prunus persica]
BN-HDR3979	chr3	15477468	down2kb	15477643	down2kb	CsaV3_3G019590.1	-	Alcohol dehydrogenase, N-terminal	oxidoreductase family protein [Populus trichocarpa]	chr3	15371813	-	15372155	down2kb	BNv1_03G08318	-	Alcohol dehydrogenase, N-terminal	oxidoreductase family protein [Populus trichocarpa]
BN-HDR3980	chr3	15478197	down2kb	15478287	down2kb	CsaV3_3G019590.1	-	Alcohol dehydrogenase, N-terminal	oxidoreductase family protein [Populus trichocarpa]	chr3	15372714	down2kb	15372714	down2kb	BNv1_03G08318	-	Alcohol dehydrogenase, N-terminal	oxidoreductase family protein [Populus trichocarpa]
BN-CPG3981	chr3	15495797	up2kb	15495804	up2kb	CsaV3_3G019610.1	-	Transcription elongation factor 1	transcription elongation factor 1 homolog [Cucumis sativus]	chr3	15390265	up2kb	15390744	up2kb	BNv1_03G08320	-	Transcription elongation factor 1	transcription elongation factor 1 homolog [Cucumis sativus]
BN-HDR3982	chr3	15496395	up2kb	15498539	intron	CsaV3_3G019610.1	-	Transcription elongation factor 1	transcription elongation factor 1 homolog [Cucumis sativus]	chr3	15391331	-	15393489	-	-	-		-
BN-HDR3896	chr3	14714887	-	14715019	-	-	-		-	chr3	14654972	down2kb	14654984	down2kb	BNv1_03G08264	-		-
BN-DUP9011	chr6	20739682	-	20740235	-	-	-		-	chr3	14758333	intron4	14758882	intron4	BNv1_03G08270	+	Membralin	uncharacterized protein LOC101205453 [Cucumis sativus]
BN-NOTAL1851	-	-	-	-	-	-	-		-	chr3	14898338	intron1	14899886	up2kb	BNv1_03G08277	-	DEAD/DEAH box helicase domain	hypothetical protein PRUPE_ppa000416mg [Prunus persica]
BN-CPG3929	chr3	15072104	-	15072204	-	-	-		-	chr3	14995004	up2kb	14995205	up2kb	BNv1_03G08286	+		-
BN-NOTAL1853	-	-	-	-	-	-	-		-	chr3	15098829	intron17	15099512	intron17	BNv1_03G08293	-	Helicase, C-terminal IPR007502	hypothetical protein PRUPE_ppa000230mg [Prunus persica]
BN-NOTAL1854	-	-	-	-	-	-	-		-	chr3	15100382	intron17	15100440	intron17	BNv1_03G08293	-	Helicase, C-terminal IPR007502	hypothetical protein PRUPE_ppa000230mg [Prunus persica]
BN-DUP7519	chr4	26461570	-	26462491	-	-	-		-	chr3	15099513	intron17	15100381	intron17	BNv1_03G08293	-	Helicase, C-terminal IPR007502	hypothetical protein PRUPE_ppa000230mg [Prunus persica]
BN-DUP9761	chr7	11143261	-	11148471	-	-	-		-	chr3	15114477	intron12	15119540	intron12	BNv1_03G08293	-	Helicase, C-terminal IPR007502	hypothetical protein PRUPE_ppa000230mg [Prunus persica]
BN-INVDP4452	chr3	38517283	-	38517999	-	-	-		-	chr3	15142794	intron6	15143512	intron6	BNv1_03G08293	-	Helicase, C-terminal IPR007502	hypothetical protein PRUPE_ppa000230mg [Prunus persica]
BN-HDR3959	chr3	15310752	-	15311114	-	-	-		-	chr3	15210883	up2kb	15211090	up2kb	BNv1_03G08300	+	Leucine-rich repeat	hypothetical protein PHAVU_004G100300g [Phaseolus vulgaris]
BN-NOTAL1860	-	-	-	-	-	-	-		-	chr3	15211707	up2kb	15212084	exon1	BNv1_03G08300	+	Leucine-rich repeat	hypothetical protein PHAVU_004G100300g [Phaseolus vulgaris]
BN-CPL3983	chr3	15520630	-	15520701	-	-	-		-	chr3	15415565	intron1	15415585	intron1	BNv1_03G08324	+	ATPase, AAA-type, core	ATPase family AAA domain-containing protein 1 [Cucumis sativus]
BN-CPL3984	chr3	15539648	-	15539740	-	-	-		-	chr3	15434521	down2kb	15434565	down2kb	BNv1_03G08328	-	Zinc finger, Dof-type	dof zinc finger protein DOF1.8-like [Cucumis sativus]
BN-HDR3985	chr3	15561083	-	15561117	-	-	-		-	chr3	15455898	down2kb	15456161	down2kb	BNv1_03G08331	+	SPARC/Testican, calcium-binding domain	hypothetical protein PRUPE_ppa019586mg [Prunus persica]
BN-CPG3986	chr3	15612685	-	15612716	-	-	-		-	chr3	15507762	up2kb	15508037	-	BNv1_03G08339	-		uncharacterized protein At4g00950-like [Cucumis sativus]
BN-CPG3986	chr3	15612685	-	15612716	-	-	-		-	chr3	15507762	intron2	15508037	intron2	BNv1_03G08340	-		myosin heavy chain, striated muscle [Cucumis sativus]
BN-CPL3987	chr3	15619427	-	15619552	-	-	-		-	chr3	15514787	down2kb	15514848	down2kb	BNv1_03G08342	-	IQ motif, EF-hand binding site IPR025064	protein IQ-DOMAIN 1 isoform X1 [Cucumis melo]
BN-DEL3992	chr3	15692969	-	15693020	-	-	-		-	chr3	15589043	up2kb	15589043	up2kb	BNv1_03G08353	+	EF-hand domain	calcineurin B-like protein 4 [Cucumis sativus]
BN-HDR3997	chr3	15754376	-	15754850	-	-	-		-	chr3	15650059	up2kb	15650360	up2kb	BNv1_03G08355	+	CCT domain	zinc finger protein CONSTANS-LIKE 1 [Cucumis sativus]
BN-CPL4004	chr3	15893103	-	15893183	-	-	-		-	chr3	15797859	down2kb	15797899	down2kb	BNv1_03G08358	+	Bifunctional inhibitor/plant lipid transfer protein/seed storage helical domain	lipid transfer-like protein VAS [Cucumis sativus]
BN-HDR4008	chr3	15927755	-	15927818	-	-	-		-	chr3	15836801	up2kb	15836803	up2kb	BNv1_03G08364	+	Protein of unknown function DUF761, plant	Sarcoplasmic reticulum histidine-rich calcium-binding protein, putative [Theobroma cacao]
BN-CPL4013	chr3	15962176	-	15962276	-	-	-		-	chr3	15871924	intron7	15871932	intron7	BNv1_03G08367	+	OTU domain	OTU domain-containing protein DDB_G0284757 [Cucumis sativus]
BN-CPL4013	chr3	15962176	-	15962276	-	-	-		-	chr3	15871924	down2kb	15871932	down2kb	BNv1_03G08368	-	Glyceraldehyde 3-phosphate dehydrogenase, NAD(P) binding domain IPR020829	glyceraldehyde-3-phosphate dehydrogenase A, chloroplastic [Cucumis sativus]
BN-DUP2778	chr3	16007101	-	16007347	-	-	-		-	chr3	15917146	intron16	15917393	intron16	BNv1_03G08370	+	AMP-dependent synthetase/ligase IPR025110	acetyl-coenzyme A synthetase, chloroplastic/glyoxysomal isoform X1 [Cucumis sativus]
BN-CPL4014	chr3	16001241	-	16001313	-	-	-		-	chr3	15910890	intron8	15910926	intron8	BNv1_03G08370	+	AMP-dependent synthetase/ligase IPR025110	acetyl-coenzyme A synthetase, chloroplastic/glyoxysomal isoform X1 [Cucumis sativus]
BN-CPL4015	chr3	16004015	-	16004099	-	-	-		-	chr3	15913642	intron11	15913683	intron11	BNv1_03G08370	+	AMP-dependent synthetase/ligase IPR025110	acetyl-coenzyme A synthetase, chloroplastic/glyoxysomal isoform X1 [Cucumis sativus]
BN-INVDP6985	chr4	6773380	-	6773587	-	-	-		-	chr3	15916939	intron16	15917146	intron16	BNv1_03G08370	+	AMP-dependent synthetase/ligase IPR025110	acetyl-coenzyme A synthetase, chloroplastic/glyoxysomal isoform X1 [Cucumis sativus]
BN-NOTAL1867	-	-	-	-	-	-	-		-	chr3	15997308	intron1	15997452	intron1	BNv1_03G08371	-	Exportin-1/Importin-beta-like	transportin-3-like isoform X3 [Citrus sinensis]
BN-TDM4021	chr3	16064652	-	16064767	-	-	-		-	chr3	15975366	intron9	15975431	intron9	BNv1_03G08371	-	Exportin-1/Importin-beta-like	transportin-3-like isoform X3 [Citrus sinensis]
BN-CPG4017	chr3	16027516	-	16027541	-	-	-		-	chr3	15935904	intron22	15935957	intron22	BNv1_03G08371	-	Exportin-1/Importin-beta-like	transportin-3-like isoform X3 [Citrus sinensis]
BN-CPG4018	chr3	16039540	-	16039546	-	-	-		-	chr3	15947949	intron16	15951216	intron16	BNv1_03G08371	-	Exportin-1/Importin-beta-like	transportin-3-like isoform X3 [Citrus sinensis]
BN-CPG4020	chr3	16052909	-	16052914	-	-	-		-	chr3	15963556	intron10	15963637	intron10	BNv1_03G08371	-	Exportin-1/Importin-beta-like	transportin-3-like isoform X3 [Citrus sinensis]
BN-CPL4016	chr3	16026792	-	16026881	-	-	-		-	chr3	15935226	intron22	15935270	intron22	BNv1_03G08371	-	Exportin-1/Importin-beta-like	transportin-3-like isoform X3 [Citrus sinensis]
BN-DUP2863	chr3	24532084	-	24533319	-	-	-		-	chr3	15996090	intron1	15997307	intron1	BNv1_03G08371	-	Exportin-1/Importin-beta-like	transportin-3-like isoform X3 [Citrus sinensis]
BN-HDR4019	chr3	16050630	-	16051663	-	-	-		-	chr3	15962307	intron10	15962311	intron10	BNv1_03G08371	-	Exportin-1/Importin-beta-like	transportin-3-like isoform X3 [Citrus sinensis]
BN-HDR4022	chr3	16081016	-	16081163	-	-	-		-	chr3	15991677	intron6	15991798	intron6	BNv1_03G08371	-	Exportin-1/Importin-beta-like	transportin-3-like isoform X3 [Citrus sinensis]
BN-HDR4023	chr3	16088223	-	16088760	-	-	-		-	chr3	16000294	up2kb	16003213	-	BNv1_03G08371	-	Exportin-1/Importin-beta-like	transportin-3-like isoform X3 [Citrus sinensis]
BN-DEL4024	chr3	16127148	-	16127218	-	-	-		-	chr3	16041643	intron4	16041643	intron4	BNv1_03G08373	-	Root UVB sensitive family	Uncharacterized protein isoform 1 [Theobroma cacao]
BN-HDR4230	chr3	20340870	up2kb	20341073	up2kb	CsaV3_3G022830.1	+		-	chr3	20319240	up2kb	20319452	up2kb	BNv1_03G08608	+		-
BN-HDR4235	chr3	20382429	intron4	20385377	intron4	CsaV3_3G022860.1	+	Pentatricopeptide repeat	hypothetical protein PRUPE_ppa001961mg [Prunus persica]	chr3	20360593	intron4	20360597	intron4	BNv1_03G08611	+	Pentatricopeptide repeat	hypothetical protein PRUPE_ppa001961mg [Prunus persica]
BN-DEL4234	chr3	20375366	up2kb	20375498	up2kb	CsaV3_3G022860.1	+	Pentatricopeptide repeat	hypothetical protein PRUPE_ppa001961mg [Prunus persica]	chr3	20353672	up2kb	20353673	up2kb	BNv1_03G08611	+	Pentatricopeptide repeat	hypothetical protein PRUPE_ppa001961mg [Prunus persica]
BN-DEL4236	chr3	20399024	intron10	20399104	intron10	CsaV3_3G022860.1	+	Pentatricopeptide repeat	hypothetical protein PRUPE_ppa001961mg [Prunus persica]	chr3	20374227	intron10	20374230	intron10	BNv1_03G08611	+	Pentatricopeptide repeat	hypothetical protein PRUPE_ppa001961mg [Prunus persica]
BN-DUP6623	chr3	20422979	intron	20425837	down2kb	CsaV3_3G022890.1	-		-	chr1	12422991	-	12425847	-	-	-		-
BN-HDR4239	chr3	20427742	up2kb	20427954	up2kb	CsaV3_3G022890.1	-		-	chr3	20397353	up2kb	20397509	up2kb	BNv1_03G08615	-		-
BN-HDR4241	chr3	20483157	intron6	20483158	intron6	CsaV3_3G022940.1	+		uncharacterized protein LOC101214437 [Cucumis sativus]	chr3	20455126	intron6	20455185	intron6	BNv1_03G08619	+		uncharacterized protein LOC101214437 [Cucumis sativus]
BN-CPL4242	chr3	20485187	exon7	20485316	exon7	CsaV3_3G022940.1	+		uncharacterized protein LOC101214437 [Cucumis sativus]	chr3	20457217	down2kb	20457280	down2kb	BNv1_03G08619	+		uncharacterized protein LOC101214437 [Cucumis sativus]
BN-TDM4240	chr3	20474912	up2kb	20475009	up2kb	CsaV3_3G022940.1	+		uncharacterized protein LOC101214437 [Cucumis sativus]	chr3	20446785	up2kb	20446946	up2kb	BNv1_03G08619	+		uncharacterized protein LOC101214437 [Cucumis sativus]
BN-DEL4244	chr3	20497519	down2kb	20497578	down2kb	CsaV3_3G022950.1	+		hypothetical protein Csa_3G416650 [Cucumis sativus]	chr3	20469514	down2kb	20469514	down2kb	BNv1_03G08620	+		hypothetical protein Csa_3G416650 [Cucumis sativus]
BN-DEL4244	chr3	20497519	intron3	20497578	intron3	CsaV3_3G022960.1	-	Cytochrome P450	taxadiene 5-alpha hydroxylase-like [Cucumis sativus]	chr3	20469514	intron3	20469514	intron3	BNv1_03G08621	-	Cytochrome P450	taxadiene 5-alpha hydroxylase-like [Cucumis sativus]
BN-HDR4243	chr3	20489947	up2kb	20490220	up2kb	CsaV3_3G022950.1	+		hypothetical protein Csa_3G416650 [Cucumis sativus]	chr3	20461904	-	20462192	up2kb	BNv1_03G08620	+		hypothetical protein Csa_3G416650 [Cucumis sativus]
BN-INVDP6625	chr3	20502936	up2kb	20503502	up2kb	CsaV3_3G022960.1	-	Cytochrome P450	taxadiene 5-alpha hydroxylase-like [Cucumis sativus]	chr4	25561869	-	25562447	-	-	-		-
BN-INVDP6625	chr3	20502936	intron	20503502	up2kb	CsaV3_3G022970.1	+		-	chr4	25561869	-	25562447	-	-	-		-
BN-INVDP6625	chr3	20502936	-	20503502	-	-	-		-	chr4	25561869	up2kb	25562447	up2kb	BNv1_04G12904	+		-
BN-HDR4246	chr3	20504687	up2kb	20505018	up2kb	CsaV3_3G022970.1	+		-	chr3	20476567	-	20476990	-	-	-		-
BN-INS4249	chr3	20523656	down2kb	20523660	down2kb	CsaV3_3G022980.1	-		-	chr3	20498941	-	20499329	-	-	-		-
BN-HDR4250	chr3	20560187	down2kb	20560344	down2kb	CsaV3_3G023030.1	+		-	chr3	20539742	down2kb	20539878	down2kb	BNv1_03G08625	+		-
BN-HDR4250	chr3	20560187	down2kb	20560344	intron1	CsaV3_3G023040.1	-		-	chr3	20539742	down2kb	20539878	down2kb	BNv1_03G08626	-		-
BN-INS4251	chr3	20562947	up2kb	20562948	up2kb	CsaV3_3G023040.1	-		-	chr3	20542504	up2kb	20543915	-	BNv1_03G08626	-		-
BN-INS4251	chr3	20562947	-	20562948	-	-	-		-	chr3	20542504	-	20543915	down2kb	BNv1_03G08627	-		-
BN-HDR4255	chr3	20607913	intron	20608059	up2kb	CsaV3_3G023110.1	+	ABC transporter-like IPR011527	putative multidrug resistance protein [Cucumis sativus]	chr3	20589074	-	20589188	up2kb	BNv1_03G08632	+	ABC transporter-like IPR011527	putative multidrug resistance protein [Cucumis sativus]
BN-TDM4256	chr3	20609574	up2kb	20609605	up2kb	CsaV3_3G023110.1	+	ABC transporter-like IPR011527	putative multidrug resistance protein [Cucumis sativus]	chr3	20590680	up2kb	20590731	up2kb	BNv1_03G08632	+	ABC transporter-like IPR011527	putative multidrug resistance protein [Cucumis sativus]
BN-DEL4262	chr3	20635079	up2kb	20635325	up2kb	CsaV3_3G023120.1	-		protein NDR1-like [Cucumis sativus]	chr3	20624865	up2kb	20624865	up2kb	BNv1_03G08633	-		protein NDR1-like [Cucumis sativus]
BN-TDM4261	chr3	20631630	down2kb	20631722	down2kb	CsaV3_3G023120.1	-		protein NDR1-like [Cucumis sativus]	chr3	20621449	down2kb	20621497	down2kb	BNv1_03G08633	-		protein NDR1-like [Cucumis sativus]
BN-HDR4265	chr3	20640872	down2kb	20640992	down2kb	CsaV3_3G023130.1	-	Transport protein particle (TRAPP) component	trafficking protein particle complex subunit 3 [Fragaria vesca subsp. vesca]	chr3	20632320	down2kb	20632320	down2kb	BNv1_03G08634	-	Transport protein particle (TRAPP) component	trafficking protein particle complex subunit 3 [Fragaria vesca subsp. vesca]
BN-HDR4266	chr3	20649441	up2kb	20649729	up2kb	CsaV3_3G023130.1	-	Transport protein particle (TRAPP) component	trafficking protein particle complex subunit 3 [Fragaria vesca subsp. vesca]	chr3	20640733	up2kb	20640839	up2kb	BNv1_03G08634	-	Transport protein particle (TRAPP) component	trafficking protein particle complex subunit 3 [Fragaria vesca subsp. vesca]
BN-TDM4277	chr3	20724722	down2kb	20725039	down2kb	CsaV3_3G023180.1	-	COBRA, plant	COBRA-like protein 10 [Cucumis sativus]	chr3	20712843	down2kb	20713004	down2kb	BNv1_03G08639	-	COBRA, plant	COBRA-like protein 10 [Cucumis sativus]
BN-TDM4278	chr3	20795631	exon1	20795691	exon1	CsaV3_3G023240.1	-		-	chr3	20783570	up2kb	20783609	up2kb	BNv1_03G08645	-		-
BN-HDR4285	chr3	21249703	up2kb	21250171	up2kb	CsaV3_3G023530.1	-		-	chr3	21228450	up2kb	21228983	up2kb	BNv1_03G08672	-		-
BN-INS4290	chr3	21266191	up2kb	21266192	up2kb	CsaV3_3G023540.1	+		SNF1-related protein kinase regulatory subunit beta-2 [Cucumis sativus]	chr3	21244505	up2kb	21244559	up2kb	BNv1_03G08673	+		-
BN-CPG4291	chr3	21275148	up2kb	21275185	up2kb	CsaV3_3G023550.1	-	AUX/IAA domain	auxin-responsive protein IAA26-like [Cucumis sativus]	chr3	21253462	up2kb	21253534	up2kb	BNv1_03G08674	-	AUX/IAA domain	auxin-responsive protein IAA26-like [Cucumis sativus]
BN-CPG4291	chr3	21275148	exon2	21275185	exon2	CsaV3_3G023560.1	-		-	chr3	21253462	exon3	21253534	exon2	BNv1_03G08675	-		-
BN-INS4296	chr3	21323630	down2kb	21323630	down2kb	CsaV3_3G023580.1	+	Serine-threonine/tyrosine-protein kinase, catalytic domain IPR018392	Proline-rich receptor-like protein kinase PERK8 [Glycine soja]	chr3	21302013	intron12	21302067	intron12	BNv1_03G08677	+	Serine-threonine/tyrosine-protein kinase, catalytic domain IPR018392	Proline-rich receptor-like protein kinase PERK8 [Glycine soja]
BN-INS4296	chr3	21323630	up2kb	21323630	up2kb	CsaV3_3G023590.1	+		Uncharacterized protein TCM_028895 [Theobroma cacao]	chr3	21302013	intron12	21302067	intron12	BNv1_03G08677	+	Serine-threonine/tyrosine-protein kinase, catalytic domain IPR018392	Proline-rich receptor-like protein kinase PERK8 [Glycine soja]
BN-CPG4297	chr3	21324670	intron1	21324752	exon2	CsaV3_3G023590.1	+		Uncharacterized protein TCM_028895 [Theobroma cacao]	chr3	21303107	intron13	21303272	exon14	BNv1_03G08677	+	Serine-threonine/tyrosine-protein kinase, catalytic domain IPR018392	Proline-rich receptor-like protein kinase PERK8 [Glycine soja]
BN-INS4298	chr3	21331455	up2kb	21331457	up2kb	CsaV3_3G023600.1	-	Signal transduction histidine kinase, phosphotransfer (Hpt) domain	histidine-containing phosphotransfer protein 4-like isoform X2 [Cucumis sativus]	chr3	21309942	up2kb	21310429	up2kb	BNv1_03G08678	-	Signal transduction histidine kinase, phosphotransfer (Hpt) domain	histidine-containing phosphotransfer protein 4-like isoform X2 [Cucumis sativus]
BN-INS4298	chr3	21331455	down2kb	21331457	down2kb	CsaV3_3G023610.1	-	Malic enzyme, N-terminal domain IPR012302	Malic enzyme [Cucumis sativus]	chr3	21309942	-	21310429	down2kb	BNv1_03G08679	-	Malic enzyme, N-terminal domain IPR012302	Malic enzyme [Cucumis sativus]
BN-CPG4299	chr3	21332201	down2kb	21332241	down2kb	CsaV3_3G023610.1	-	Malic enzyme, N-terminal domain IPR012302	Malic enzyme [Cucumis sativus]	chr3	21311187	down2kb	21311270	down2kb	BNv1_03G08679	-	Malic enzyme, N-terminal domain IPR012302	Malic enzyme [Cucumis sativus]
BN-CPG4299	chr3	21332201	up2kb	21332241	up2kb	CsaV3_3G023600.1	-	Signal transduction histidine kinase, phosphotransfer (Hpt) domain	histidine-containing phosphotransfer protein 4-like isoform X2 [Cucumis sativus]	chr3	21311187	-	21311270	-	-	-		-
BN-HDR4300	chr3	21338908	up2kb	21339098	up2kb	CsaV3_3G023610.1	-	Malic enzyme, N-terminal domain IPR012302	Malic enzyme [Cucumis sativus]	chr3	21317918	up2kb	21318104	up2kb	BNv1_03G08679	-	Malic enzyme, N-terminal domain IPR012302	Malic enzyme [Cucumis sativus]
BN-HDR4309	chr3	21437617	intron	21437693	down2kb	CsaV3_3G023640.1	-		-	chr3	21397435	down2kb	21397435	down2kb	BNv1_03G08682	-		-
BN-HDR4310	chr3	21446039	intron	21446396	up2kb	CsaV3_3G023650.1	+	Non-haem dioxygenase N-terminal domain	hypothetical protein VITISV_013720 [Vitis vinifera]	chr3	21407773	-	21408067	up2kb	BNv1_03G08683	+	Non-haem dioxygenase N-terminal domain	hypothetical protein VITISV_013720 [Vitis vinifera]
BN-HDR4311	chr3	21452037	exon3	21452645	down2kb	CsaV3_3G023650.1	+	Non-haem dioxygenase N-terminal domain	hypothetical protein VITISV_013720 [Vitis vinifera]	chr3	21413706	down2kb	21414317	down2kb	BNv1_03G08683	+	Non-haem dioxygenase N-terminal domain	hypothetical protein VITISV_013720 [Vitis vinifera]
BN-INVDP6659	chr3	21453911	down2kb	21454304	intron	CsaV3_3G023650.1	+	Non-haem dioxygenase N-terminal domain	hypothetical protein VITISV_013720 [Vitis vinifera]	chr5	22463642	-	22464037	-	-	-		-
BN-INVDP6659	chr3	21453911	up2kb	21454304	up2kb	CsaV3_3G023660.1	+		-	chr5	22463642	-	22464037	-	-	-		-
BN-INVDP6659	chr3	21453911	intron	21454304	up2kb	CsaV3_3G023670.1	+	Protein kinase domain	serine/threonine-protein kinase EDR1 isoform X1 [Vitis vinifera]	chr5	22463642	-	22464037	-	-	-		-
BN-INVDP6660	chr3	21454240	up2kb	21459593	intron	CsaV3_3G023660.1	+		-	chr6	11539581	-	11544928	up2kb	BNv1_06G17988	-		-
BN-INVDP6660	chr3	21454240	intron	21459593	down2kb	CsaV3_3G023670.1	+	Protein kinase domain	serine/threonine-protein kinase EDR1 isoform X1 [Vitis vinifera]	chr6	11539581	-	11544928	-	-	-		-
BN-INVDP6660	chr3	21454240	-	21459593	-	-	-		-	chr6	11539581	-	11544928	up2kb	BNv1_06G17989	+		-
BN-CPL4314	chr3	21468488	down2kb	21470037	intron	CsaV3_3G023680.1	+	AP2/ERF domain	ethylene-responsive transcription factor TINY-like [Cucumis sativus]	chr3	21345448	-	21345459	-	-	-		-
BN-INVTR2229	chr3	21467527	exon1	21480534	intron	CsaV3_3G023680.1	+	AP2/ERF domain	ethylene-responsive transcription factor TINY-like [Cucumis sativus]	chr3	21333094	-	21346417	-	-	-		-
BN-INVTR2229	chr3	21467527	intron	21480534	intron	CsaV3_3G023690.1	-		-	chr3	21333094	-	21346417	-	-	-		-
BN-CPG4315	chr3	21476689	up2kb	21476694	up2kb	CsaV3_3G023690.1	-		-	chr3	21336941	-	21338873	-	-	-		-
BN-DUP6661	chr3	21497530	intron6	21502581	intron6	CsaV3_3G023700.1	-	Biotin protein ligase, C-terminal IPR004143	hypothetical protein PRUPE_ppa007504mg [Prunus persica]	chr6	16280707	-	16285767	-	-	-		-
BN-TRANS1920	chr3	21511377	intron	21784624	intron	CsaV3_3G023710.1	+	Ankyrin repeat IPR020683	ankyrin repeat family protein [Populus trichocarpa]	chr3	22186821	-	22511054	-	BNv1_03G08714	+	Ankyrin repeat IPR020683	ankyrin repeat family protein [Populus trichocarpa]
BN-TRANS1920	chr3	21511377	intron	21784624	intron	CsaV3_3G023730.1	-	WD40 repeat	protein transport protein SEC13 homolog B [Cucumis sativus]	chr3	22186821	-	22511054	-	BNv1_03G08715	-	WD40 repeat	protein transport protein SEC13 homolog B [Cucumis sativus]
BN-TRANS1920	chr3	21511377	intron	21784624	intron	CsaV3_3G023750.1	-	ENTH domain	VHS domain-containing protein At3g16270 [Cucumis sativus]	chr3	22186821	-	22511054	-	BNv1_03G08716	-	ENTH domain	VHS domain-containing protein At3g16270 [Cucumis sativus]
BN-TRANS1920	chr3	21511377	intron	21784624	intron	CsaV3_3G023760.1	+	WD40 repeat	F-box/WD repeat-containing protein pof1-like [Cucumis sativus]	chr3	22186821	-	22511054	-	BNv1_03G08717	+	WD40 repeat	F-box/WD repeat-containing protein pof1-like [Cucumis sativus]
BN-TRANS1920	chr3	21511377	intron	21784624	intron	CsaV3_3G023760.1	+	WD40 repeat	F-box/WD repeat-containing protein pof1-like [Cucumis sativus]	chr3	22186821	-	22511054	-	BNv1_03G08718	-	WD40 repeat	F-box/WD repeat-containing protein 7-like [Cucumis sativus]
BN-TRANS1920	chr3	21511377	intron	21784624	intron	CsaV3_3G023780.1	-	WD40 repeat	F-box/WD repeat-containing protein 7-like [Cucumis sativus]	chr3	22186821	-	22511054	-	BNv1_03G08718	-	WD40 repeat	F-box/WD repeat-containing protein 7-like [Cucumis sativus]
BN-TRANS1920	chr3	21511377	intron	21784624	intron	CsaV3_3G023780.1	-	WD40 repeat	F-box/WD repeat-containing protein 7-like [Cucumis sativus]	chr3	22186821	-	22511054	-	BNv1_03G08717	+	WD40 repeat	F-box/WD repeat-containing protein pof1-like [Cucumis sativus]
BN-TRANS1920	chr3	21511377	intron	21784624	intron	CsaV3_3G023790.1	-		-	chr3	22186821	-	22511054	-	BNv1_03G08719	-		-
BN-TRANS1920	chr3	21511377	intron	21784624	intron	CsaV3_3G023810.1	+		uncharacterized protein LOC101206567 [Cucumis sativus]	chr3	22186821	-	22511054	-	BNv1_03G08720	+		uncharacterized protein LOC101206567 [Cucumis sativus]
BN-TRANS1920	chr3	21511377	intron	21784624	intron	CsaV3_3G023820.1	-		bet1-like SNARE 1-2 isoform X1 [Cucumis sativus]	chr3	22186821	-	22511054	-	BNv1_03G08722	-		bet1-like SNARE 1-2 isoform X1 [Cucumis sativus]
BN-TRANS1920	chr3	21511377	intron6	21784624	intron	CsaV3_3G023700.1	-	Biotin protein ligase, C-terminal IPR004143	hypothetical protein PRUPE_ppa007504mg [Prunus persica]	chr3	22186821	-	22511054	-	-	-		-
BN-TRANS1920	chr3	21511377	intron	21784624	intron	CsaV3_3G023720.1	-	Zinc finger, GATA-type	GATA transcription factor 9-like [Cucumis sativus]	chr3	22186821	-	22511054	-	-	-		-
BN-TRANS1920	chr3	21511377	intron	21784624	intron	CsaV3_3G023740.1	+	Protein of unknown function DUF761, plant	uncharacterized protein LOC100786760 [Glycine max]	chr3	22186821	-	22511054	-	-	-		-
BN-TRANS1920	chr3	21511377	intron	21784624	intron	CsaV3_3G023770.1	+		-	chr3	22186821	-	22511054	-	-	-		-
BN-TRANS1920	chr3	21511377	intron	21784624	intron	CsaV3_3G023800.1	+		-	chr3	22186821	-	22511054	-	-	-		-
BN-TRANS1920	chr3	21511377	intron	21784624	intron	CsaV3_3G023830.1	+	Pex, N-terminal IPR018957	peroxisome biogenesis protein 2 isoform X1 [Cucumis sativus]	chr3	22186821	-	22511054	-	-	-		-
BN-TRANS1920	chr3	21511377	-	21784624	-	-	-		-	chr3	22186821	-	22511054	-	BNv1_03G08721	-	Harbinger transposase-derived nuclease domain	retrotransposon protein [Cucumis melo subsp. melo]
BN-HDR4322	chr3	21544115	up2kb	21544711	intron	CsaV3_3G023720.1	-	Zinc finger, GATA-type	GATA transcription factor 9-like [Cucumis sativus]	chr3	22219789	-	22220117	-	-	-		-
BN-HDR4324	chr3	21572719	intron4	21572991	intron4	CsaV3_3G023750.1	-	ENTH domain	VHS domain-containing protein At3g16270 [Cucumis sativus]	chr3	22248127	down2kb	22248128	down2kb	BNv1_03G08716	-	ENTH domain	VHS domain-containing protein At3g16270 [Cucumis sativus]
BN-HDR4325	chr3	21579013	up2kb	21579101	up2kb	CsaV3_3G023750.1	-	ENTH domain	VHS domain-containing protein At3g16270 [Cucumis sativus]	chr3	22254137	up2kb	22268995	-	BNv1_03G08716	-	ENTH domain	VHS domain-containing protein At3g16270 [Cucumis sativus]
BN-HDR4361	chr3	21577647	exon1	21577728	up2kb	CsaV3_3G023750.1	-	ENTH domain	VHS domain-containing protein At3g16270 [Cucumis sativus]	chr3	21542779	-	21542837	-	-	-		-
BN-HDR4362	chr3	21578100	up2kb	21578493	up2kb	CsaV3_3G023750.1	-	ENTH domain	VHS domain-containing protein At3g16270 [Cucumis sativus]	chr3	21543209	-	21543571	-	-	-		-
BN-CPL4371	chr3	21607454	up2kb	21607565	up2kb	CsaV3_3G023760.1	+	WD40 repeat	F-box/WD repeat-containing protein pof1-like [Cucumis sativus]	chr3	21569181	-	21569234	-	-	-		-
BN-HDR4372	chr3	21611639	down2kb	21611877	down2kb	CsaV3_3G023760.1	+	WD40 repeat	F-box/WD repeat-containing protein pof1-like [Cucumis sativus]	chr3	21573310	-	21574340	-	-	-		-
BN-INS4331	chr3	21611877	down2kb	21611878	down2kb	CsaV3_3G023760.1	+	WD40 repeat	F-box/WD repeat-containing protein pof1-like [Cucumis sativus]	chr3	22295205	down2kb	22295987	down2kb	BNv1_03G08717	+	WD40 repeat	F-box/WD repeat-containing protein pof1-like [Cucumis sativus]
BN-INS4332	chr3	21612236	down2kb	21612239	down2kb	CsaV3_3G023760.1	+	WD40 repeat	F-box/WD repeat-containing protein pof1-like [Cucumis sativus]	chr3	22296357	-	22298537	-	-	-		-
BN-INS4373	chr3	21612236	down2kb	21612239	down2kb	CsaV3_3G023760.1	+	WD40 repeat	F-box/WD repeat-containing protein pof1-like [Cucumis sativus]	chr3	21574706	-	21576841	-	-	-		-
BN-HDR4334	chr3	21619388	exon1	21619916	down2kb	CsaV3_3G023770.1	+		-	chr3	22305646	-	22306036	-	-	-		-
BN-HDR4375	chr3	21619388	exon1	21619669	down2kb	CsaV3_3G023770.1	+		-	chr3	21583925	-	21584097	-	-	-		-
BN-INS4336	chr3	21624642	intron1	21624643	intron1	CsaV3_3G023780.1	-	WD40 repeat	F-box/WD repeat-containing protein 7-like [Cucumis sativus]	chr3	22310694	intron1	22310762	intron1	BNv1_03G08718	-	WD40 repeat	F-box/WD repeat-containing protein 7-like [Cucumis sativus]
BN-CPG4377	chr3	21627432	up2kb	21627466	up2kb	CsaV3_3G023780.1	-	WD40 repeat	F-box/WD repeat-containing protein 7-like [Cucumis sativus]	chr3	21591792	up2kb	21591861	up2kb	BNv1_03G08689	-	WD40 repeat	F-box/WD repeat-containing protein 7-like [Cucumis sativus]
BN-CPL4335	chr3	21621880	down2kb	21621968	down2kb	CsaV3_3G023780.1	-	WD40 repeat	F-box/WD repeat-containing protein 7-like [Cucumis sativus]	chr3	22308000	down2kb	22308021	down2kb	BNv1_03G08718	-	WD40 repeat	F-box/WD repeat-containing protein 7-like [Cucumis sativus]
BN-CPL4376	chr3	21621880	down2kb	21621968	down2kb	CsaV3_3G023780.1	-	WD40 repeat	F-box/WD repeat-containing protein 7-like [Cucumis sativus]	chr3	21586310	down2kb	21586331	down2kb	BNv1_03G08689	-	WD40 repeat	F-box/WD repeat-containing protein 7-like [Cucumis sativus]
BN-CPG4342	chr3	21647867	down2kb	21648472	down2kb	CsaV3_3G023790.1	-		-	chr3	22333863	down2kb	22341374	-	BNv1_03G08719	-		-
BN-CPG4342	chr3	21647867	up2kb	21648472	up2kb	CsaV3_3G023800.1	+		-	chr3	22333863	-	22341374	-	-	-		-
BN-HDR4343	chr3	21648598	down2kb	21649625	up2kb	CsaV3_3G023790.1	-		-	chr3	22341500	-	22349850	-	-	-		-
BN-HDR4343	chr3	21648598	up2kb	21649625	down2kb	CsaV3_3G023800.1	+		-	chr3	22341500	-	22349850	-	-	-		-
BN-HDR4380	chr3	21648539	down2kb	21649563	up2kb	CsaV3_3G023790.1	-		-	chr3	21607573	-	21608438	-	-	-		-
BN-HDR4380	chr3	21648539	up2kb	21649563	down2kb	CsaV3_3G023800.1	+		-	chr3	21607573	-	21608438	-	-	-		-
BN-INV1791	chr3	21662713	intron	21742675	intron	CsaV3_3G023810.1	+		uncharacterized protein LOC101206567 [Cucumis sativus]	chr3	21669746	-	21814241	-	BNv1_03G08690	-		uncharacterized protein LOC101206567 [Cucumis sativus]
BN-INV1791	chr3	21662713	intron	21742675	intron	CsaV3_3G023820.1	-		bet1-like SNARE 1-2 isoform X1 [Cucumis sativus]	chr3	21669746	-	21814241	-	-	-		-
BN-INV1791	chr3	21662713	intron	21742675	intron	CsaV3_3G023830.1	+	Pex, N-terminal IPR018957	peroxisome biogenesis protein 2 isoform X1 [Cucumis sativus]	chr3	21669746	-	21814241	-	-	-		-
BN-HDR4385	chr3	21681557	up2kb	21682606	up2kb	CsaV3_3G023820.1	-		bet1-like SNARE 1-2 isoform X1 [Cucumis sativus]	chr3	21795699	-	21795740	-	-	-		-
BN-HDR4347	chr3	21675416	down2kb	21675475	down2kb	CsaV3_3G023820.1	-		bet1-like SNARE 1-2 isoform X1 [Cucumis sativus]	chr3	22372027	-	22372027	-	-	-		-
BN-HDR4348	chr3	21675829	down2kb	21676154	down2kb	CsaV3_3G023820.1	-		bet1-like SNARE 1-2 isoform X1 [Cucumis sativus]	chr3	22372377	down2kb	22372629	down2kb	BNv1_03G08722	-		bet1-like SNARE 1-2 isoform X1 [Cucumis sativus]
BN-HDR4349	chr3	21681659	up2kb	21681718	up2kb	CsaV3_3G023820.1	-		bet1-like SNARE 1-2 isoform X1 [Cucumis sativus]	chr3	22378140	up2kb	22378259	up2kb	BNv1_03G08722	-		bet1-like SNARE 1-2 isoform X1 [Cucumis sativus]
BN-HDR4383	chr3	21675416	down2kb	21675475	down2kb	CsaV3_3G023820.1	-		bet1-like SNARE 1-2 isoform X1 [Cucumis sativus]	chr3	21801755	-	21801755	-	-	-		-
BN-HDR4384	chr3	21675829	down2kb	21676154	down2kb	CsaV3_3G023820.1	-		bet1-like SNARE 1-2 isoform X1 [Cucumis sativus]	chr3	21801144	-	21801405	-	-	-		-
BN-CPL4352	chr3	21710507	intron5	21714077	intron5	CsaV3_3G023830.1	+	Pex, N-terminal IPR018957	peroxisome biogenesis protein 2 isoform X1 [Cucumis sativus]	chr3	22407672	-	22407679	-	-	-		-
BN-CPL4390	chr3	21710507	intron5	21714077	intron5	CsaV3_3G023830.1	+	Pex, N-terminal IPR018957	peroxisome biogenesis protein 2 isoform X1 [Cucumis sativus]	chr3	21767137	-	21767144	-	-	-		-
BN-CPL4353	chr3	21714867	intron7	21715303	intron7	CsaV3_3G023830.1	+	Pex, N-terminal IPR018957	peroxisome biogenesis protein 2 isoform X1 [Cucumis sativus]	chr3	22408471	-	22408682	-	-	-		-
BN-CPL4391	chr3	21714866	intron7	21715304	intron7	CsaV3_3G023830.1	+	Pex, N-terminal IPR018957	peroxisome biogenesis protein 2 isoform X1 [Cucumis sativus]	chr3	21766132	-	21766344	-	-	-		-
BN-HDR4351	chr3	21705249	intron	21706046	up2kb	CsaV3_3G023830.1	+	Pex, N-terminal IPR018957	peroxisome biogenesis protein 2 isoform X1 [Cucumis sativus]	chr3	22382494	-	22403260	-	-	-		-
BN-HDR4389	chr3	21705438	intron	21706723	up2kb	CsaV3_3G023830.1	+	Pex, N-terminal IPR018957	peroxisome biogenesis protein 2 isoform X1 [Cucumis sativus]	chr3	21770903	-	21772041	-	-	-		-
BN-DUP2849	chr3	21835847	intron	21868108	intron	CsaV3_3G024830.1	+		transcription factor bHLH68-like isoform X2 [Cucumis sativus]	chr3	21962754	-	21995137	-	BNv1_03G08691	+		transcription factor bHLH68-like isoform X2 [Cucumis sativus]
BN-DUP2849	chr3	21835847	intron	21868108	intron	CsaV3_3G024840.1	-	Major facilitator, sugar transporter-like	hypothetical protein PRUPE_ppa004915mg [Prunus persica]	chr3	21962754	-	21995137	-	BNv1_03G08692	-		hypothetical protein PRUPE_ppa004915mg [Prunus persica]
BN-DUP2849	chr3	21835847	-	21868108	-	-	-		-	chr3	21962754	-	21995137	intron5	BNv1_03G08693	+	Homeobox domain IPR002913	hypothetical protein PRUPE_ppa001840mg [Prunus persica]
BN-DUP6686	chr3	21940995	intron1	21942107	intron1	CsaV3_3G024980.1	+	Ulp1 protease family, C-terminal catalytic domain	-	chr2	16919178	-	16920296	-	-	-		-
BN-TDM4401	chr3	21940649	intron1	21940685	intron1	CsaV3_3G024980.1	+	Ulp1 protease family, C-terminal catalytic domain	-	chr3	22007367	-	22007423	-	-	-		-
BN-DUP6687	chr3	22042526	intron6	22045459	intron6	CsaV3_3G025130.1	-	Lysine methyltransferase	Methyltransferase family protein, putative [Theobroma cacao]	chr5	8718848	-	8721778	-	-	-		-
BN-DUP6687	chr3	22042526	-	22045459	-	-	-		-	chr5	8718848	intron10	8721778	intron10	BNv1_05G14523	-		uncharacterized protein LOC102615872 [Citrus sinensis]
BN-DUP6688	chr3	22042526	intron6	22045462	intron6	CsaV3_3G025130.1	-	Lysine methyltransferase	Methyltransferase family protein, putative [Theobroma cacao]	chr4	26971529	-	26974466	-	-	-		-
BN-DUP6688	chr3	22042526	-	22045462	-	-	-		-	chr4	26971529	down2kb	26974466	-	BNv1_04G13051	+		retrotransposon protein [Cucumis melo subsp. melo]
BN-INVDP4412	chr3	22045014	intron6	22045460	intron6	CsaV3_3G025130.1	-	Lysine methyltransferase	Methyltransferase family protein, putative [Theobroma cacao]	chr3	33233129	-	33233558	-	-	-		-
BN-INVDP4412	chr3	22045014	-	22045460	-	-	-		-	chr3	33233129	up2kb	33233558	-	BNv1_03G09910	-	NB-ARC	putative disease resistance protein RGA3 [Cucumis sativus]
BN-INVDP4412	chr3	22045014	-	22045460	-	-	-		-	chr3	33233129	intron3	33233558	intron3	BNv1_03G09911	-	NB-ARC	putative disease resistance protein RGA3 [Cucumis sativus]
BN-DUP2851	chr3	22061823	intron	22063750	up2kb	CsaV3_3G025140.1	+		hypothetical protein VITISV_040632 [Vitis vinifera]	chr3	22643287	-	22645204	-	-	-		-
BN-DUP2852	chr3	22061824	intron	22063750	up2kb	CsaV3_3G025140.1	+		hypothetical protein VITISV_040632 [Vitis vinifera]	chr3	14394136	-	14396051	-	-	-		-
BN-DUP6689	chr3	22053925	intron	22063751	up2kb	CsaV3_3G025140.1	+		hypothetical protein VITISV_040632 [Vitis vinifera]	chr4	12856777	-	12866361	-	-	-		-
BN-DUP6693	chr3	22061458	intron	22063751	up2kb	CsaV3_3G025140.1	+		hypothetical protein VITISV_040632 [Vitis vinifera]	chr4	12844958	-	12847207	-	-	-		-
BN-DUP6694	chr3	22061517	intron	22063750	up2kb	CsaV3_3G025140.1	+		hypothetical protein VITISV_040632 [Vitis vinifera]	chr5	22561286	-	22563514	-	-	-		-
BN-DUP6698	chr3	22061541	intron	22063751	up2kb	CsaV3_3G025140.1	+		hypothetical protein VITISV_040632 [Vitis vinifera]	chr1	13620398	-	13622563	-	-	-		-
BN-HDR4402	chr3	22064859	down2kb	22064943	down2kb	CsaV3_3G025140.1	+		hypothetical protein VITISV_040632 [Vitis vinifera]	chr3	22131254	-	22131304	-	-	-		-
BN-INVDP6695	chr3	22061521	intron	22063750	up2kb	CsaV3_3G025140.1	+		hypothetical protein VITISV_040632 [Vitis vinifera]	chr1	15144028	-	15146242	-	-	-		-
BN-INVDP6696	chr3	22061531	intron	22063750	up2kb	CsaV3_3G025140.1	+		hypothetical protein VITISV_040632 [Vitis vinifera]	chr1	14907671	-	14909853	-	-	-		-
BN-INVDP6697	chr3	22061539	intron	22063747	up2kb	CsaV3_3G025140.1	+		hypothetical protein VITISV_040632 [Vitis vinifera]	chr1	12078363	-	12080535	-	-	-		-
BN-INVDP6699	chr3	22061823	intron	22063750	up2kb	CsaV3_3G025140.1	+		hypothetical protein VITISV_040632 [Vitis vinifera]	chr1	14765323	-	14767218	-	-	-		-
BN-DUP6703	chr3	22163416	intron4	22164627	intron4	CsaV3_3G025170.1	-	Malic enzyme, N-terminal domain IPR012302	hypothetical protein PRUPE_ppa003102mg [Prunus persica]	chr4	33116776	-	33117985	-	-	-		-
BN-HDR4404	chr3	22163080	intron4	22163200	intron4	CsaV3_3G025170.1	-	Malic enzyme, N-terminal domain IPR012302	hypothetical protein PRUPE_ppa003102mg [Prunus persica]	chr3	22587204	-	22587211	-	-	-		-
BN-CPG4403	chr3	22120983	intron4	22121222	intron4	CsaV3_3G025170.1	-	Malic enzyme, N-terminal domain IPR012302	hypothetical protein PRUPE_ppa003102mg [Prunus persica]	chr3	22540534	-	22541163	-	-	-		-
BN-DUP2853	chr3	22125403	intron4	22160268	intron4	CsaV3_3G025170.1	-	Malic enzyme, N-terminal domain IPR012302	hypothetical protein PRUPE_ppa003102mg [Prunus persica]	chr3	22688440	-	22723059	-	-	-		-
BN-DUP6701	chr3	22127292	intron4	22128847	intron4	CsaV3_3G025170.1	-	Malic enzyme, N-terminal domain IPR012302	hypothetical protein PRUPE_ppa003102mg [Prunus persica]	chr1	11953836	-	11955406	-	-	-		-
BN-DUP6701	chr3	22127292	-	22128847	-	-	-		-	chr1	11953836	up2kb	11955406	up2kb	BNv1_01G01850	-	Ribosomal protein L18	Ribosomal L18p/L5e family protein [Theobroma cacao]
BN-DUP6702	chr3	22134007	intron4	22135981	intron4	CsaV3_3G025170.1	-	Malic enzyme, N-terminal domain IPR012302	hypothetical protein PRUPE_ppa003102mg [Prunus persica]	chr4	32416723	-	32418693	-	-	-		-
BN-DUP6704	chr3	22168121	up2kb	22168953	up2kb	CsaV3_3G025170.1	-	Malic enzyme, N-terminal domain IPR012302	hypothetical protein PRUPE_ppa003102mg [Prunus persica]	chr4	32662996	-	32663830	-	-	-		-
BN-TRANS1924	chr3	22159906	intron	22236954	intron	CsaV3_3G025180.1	-	Electron transfer flavoprotein, alpha subunit, C-terminal	hypothetical protein CICLE_v10008777mg [Citrus clementina]	chr3	22584052	-	22641584	-	BNv1_03G08723	-	Electron transfer flavoprotein, alpha/beta-subunit, N-terminal IPR014731	hypothetical protein CICLE_v10008777mg [Citrus clementina]
BN-TRANS1924	chr3	22159906	intron	22236954	intron	CsaV3_3G025190.1	-	Electron transfer flavoprotein, alpha/beta-subunit, N-terminal	unknown [Lotus japonicus]	chr3	22584052	-	22641584	-	BNv1_03G08723	-	Electron transfer flavoprotein, alpha/beta-subunit, N-terminal IPR014731	hypothetical protein CICLE_v10008777mg [Citrus clementina]
BN-TRANS1924	chr3	22159906	intron4	22236954	intron	CsaV3_3G025170.1	-	Malic enzyme, N-terminal domain IPR012302	hypothetical protein PRUPE_ppa003102mg [Prunus persica]	chr3	22584052	-	22641584	-	-	-		-
BN-TRANS1924	chr3	22159906	intron	22236954	intron	CsaV3_3G025200.1	+		UDP-glycosyltransferase 92A1 [Cucumis sativus]	chr3	22584052	-	22641584	-	-	-		-
BN-HDR4406	chr3	22199255	up2kb	22234433	intron	CsaV3_3G025200.1	+		UDP-glycosyltransferase 92A1 [Cucumis sativus]	chr3	22632520	-	22639083	-	-	-		-
BN-DUP2854	chr3	22241459	intron	22242407	down2kb	CsaV3_3G026200.1	-	Zf-FLZ domain	uncharacterized protein LOC101221258 [Cucumis sativus]	chr3	22868653	-	22869606	-	-	-		-
BN-DUP2855	chr3	22242908	down2kb	22264118	intron	CsaV3_3G026200.1	-	Zf-FLZ domain	uncharacterized protein LOC101221258 [Cucumis sativus]	chr3	22158868	down2kb	22180232	-	BNv1_03G08713	-	Zf-FLZ domain	uncharacterized protein LOC101221258 [Cucumis sativus]
BN-DUP2855	chr3	22242908	down2kb	22264118	intron	CsaV3_3G026210.1	-		uncharacterized protein LOC101221258 [Cucumis sativus]	chr3	22158868	down2kb	22180232	-	BNv1_03G08713	-	Zf-FLZ domain	uncharacterized protein LOC101221258 [Cucumis sativus]
BN-NOTAL458	chr3	22242408	down2kb	22242907	down2kb	CsaV3_3G026200.1	-	Zf-FLZ domain	uncharacterized protein LOC101221258 [Cucumis sativus]	-	-	-	-	-	-	-		-
BN-NOTAL458	chr3	22242408	intron	22242907	down2kb	CsaV3_3G026210.1	-		uncharacterized protein LOC101221258 [Cucumis sativus]	-	-	-	-	-	-	-		-
BN-TRANS6712	chr3	22226486	intron	22242405	down2kb	CsaV3_3G026200.1	-	Zf-FLZ domain	uncharacterized protein LOC101221258 [Cucumis sativus]	chr4	33319614	-	33334974	-	-	-		-
BN-INVDP6714	chr3	22281258	intron	22289743	intron	CsaV3_3G026220.1	-		-	chr6	14907460	-	14915982	-	-	-		-
BN-CPG4414	chr3	22464720	up2kb	22464726	up2kb	CsaV3_3G026330.1	-		uncharacterized protein LOC101206322 [Cucumis sativus]	chr3	23010324	-	23010730	-	-	-		-
BN-CPG4414	chr3	22464720	-	22464726	-	-	-		-	chr3	23010324	intron1	23010730	intron1	BNv1_03G08742	+		-
BN-HDR4415	chr3	22466795	up2kb	22466899	up2kb	CsaV3_3G026350.1	+		-	chr3	23012807	up2kb	23012888	up2kb	BNv1_03G08743	+		-
BN-HDR4415	chr3	22466795	-	22466899	-	-	-		-	chr3	23012807	down2kb	23012888	down2kb	BNv1_03G08742	+		-
BN-INVDP6753	chr3	22494819	up2kb	22495855	intron	CsaV3_3G026390.1	-		-	chr5	22850801	-	22851840	-	-	-		-
BN-NOTAL459	chr3	22494191	up2kb	22494818	up2kb	CsaV3_3G026390.1	-		-	-	-	-	-	-	-	-		-
BN-INS4420	chr3	22542054	up2kb	22542057	up2kb	CsaV3_3G026430.1	-		-	chr3	23079790	up2kb	23080335	up2kb	BNv1_03G08752	-		-
BN-TDM4419	chr3	22539068	down2kb	22540186	down2kb	CsaV3_3G026430.1	-		-	chr3	23076983	down2kb	23077918	down2kb	BNv1_03G08752	-		-
BN-TDM4422	chr3	22583183	up2kb	22583292	up2kb	CsaV3_3G026480.1	-	Diacylglycerol acyltransferase IPR022742	acyltransferase-like protein At3g26840, chloroplastic [Cucumis sativus]	chr3	23122207	up2kb	23122286	up2kb	BNv1_03G08757	-	Diacylglycerol acyltransferase IPR022742	acyltransferase-like protein At3g26840, chloroplastic [Cucumis sativus]
BN-DEL4423	chr3	22588252	up2kb	22588328	up2kb	CsaV3_3G026490.1	-		-	chr3	23127247	-	23127247	-	-	-		-
BN-DUP2858	chr3	22626974	down2kb	22628305	intron	CsaV3_3G026500.1	+		DNA topoisomerase 2-binding protein 1-A-like isoform X1 [Glycine max]	chr3	28167395	-	28168734	-	-	-		-
BN-DUP2858	chr3	22626974	intron2	22628305	intron4	CsaV3_3G026510.1	+	BRCT domain	DNA topoisomerase 2-binding protein 1-like [Solanum tuberosum]	chr3	28167395	-	28168734	-	-	-		-
BN-DUP6778	chr3	22623183	intron	22624573	up2kb	CsaV3_3G026500.1	+		DNA topoisomerase 2-binding protein 1-A-like isoform X1 [Glycine max]	chr6	18602710	-	18604101	-	-	-		-
BN-DUP6779	chr3	22628949	intron4	22629375	exon5	CsaV3_3G026510.1	+	BRCT domain	DNA topoisomerase 2-binding protein 1-like [Solanum tuberosum]	chr6	19019571	-	19019994	-	-	-		-
BN-HDR4424	chr3	22630709	intron6	22630805	intron6	CsaV3_3G026510.1	+	BRCT domain	DNA topoisomerase 2-binding protein 1-like [Solanum tuberosum]	chr3	23156721	intron6	23156787	intron6	BNv1_03G08758	+	BRCT domain	DNA topoisomerase 2-binding protein 1-like [Solanum tuberosum]
BN-INVDP6780	chr3	22691949	down2kb	22692727	intron	CsaV3_3G026550.1	+	AMP-dependent synthetase/ligase	hypothetical protein POPTR_0002s19330g [Populus trichocarpa]	chr5	10554593	-	10555344	-	-	-		-
BN-CPL4425	chr3	22700091	down2kb	22700176	down2kb	CsaV3_3G026560.1	-		uncharacterized protein LOC101214824 [Cucumis sativus]	chr3	23225977	down2kb	23225994	down2kb	BNv1_03G08763	-		uncharacterized protein LOC101214824 [Cucumis sativus]
BN-HDR4428	chr3	22758403	down2kb	22758437	down2kb	CsaV3_3G026610.1	-		transcription factor UPBEAT1 [Vitis vinifera]	chr3	23286568	-	23286734	down2kb	BNv1_03G08768	-		transcription factor UPBEAT1 [Vitis vinifera]
BN-HDR4430	chr3	22762033	up2kb	22762047	up2kb	CsaV3_3G026610.1	-		transcription factor UPBEAT1 [Vitis vinifera]	chr3	23290381	up2kb	23290452	up2kb	BNv1_03G08768	-		transcription factor UPBEAT1 [Vitis vinifera]
BN-INS4429	chr3	22759887	down2kb	22759888	down2kb	CsaV3_3G026610.1	-		transcription factor UPBEAT1 [Vitis vinifera]	chr3	23288180	down2kb	23288236	down2kb	BNv1_03G08768	-		transcription factor UPBEAT1 [Vitis vinifera]
BN-CPL4433	chr3	22832139	down2kb	22833064	intron	CsaV3_3G026650.1	+	Serine aminopeptidase, S33	caffeoylshikimate esterase [Cucumis sativus]	chr3	23362270	down2kb	23362275	down2kb	BNv1_03G08772	+	Serine aminopeptidase, S33	caffeoylshikimate esterase [Cucumis sativus]
BN-HDR4438	chr3	23082889	down2kb	23083010	down2kb	CsaV3_3G026800.1	-	Cation/H+ exchanger	cation/H(+) antiporter 15-like [Cucumis sativus]	chr3	23611543	down2kb	23611651	down2kb	BNv1_03G08785	-	Cation/H+ exchanger	cation/H(+) antiporter 15-like [Cucumis sativus]
BN-DUP2861	chr3	23206579	intron	23207055	down2kb	CsaV3_3G026880.1	-	Oligopeptide transporter, OPT superfamily	probable metal-nicotianamine transporter YSL6 [Cucumis sativus]	chr3	23430449	-	23430926	-	-	-		-
BN-TRANS1926	chr3	23203244	intron	23207053	down2kb	CsaV3_3G026880.1	-	Oligopeptide transporter, OPT superfamily	probable metal-nicotianamine transporter YSL6 [Cucumis sativus]	chr3	24468236	-	24472044	-	-	-		-
BN-TRANS1926	chr3	23203244	-	23207053	-	-	-		-	chr3	24468236	up2kb	24472044	down2kb	BNv1_03G08868	+	Protein kinase domain	predicted protein [Bathycoccus prasinos]
BN-TDM4446	chr3	23461864	up2kb	23461896	up2kb	CsaV3_3G027060.1	-	SWIB/MDM2 domain	SWI/SNF complex component SNF12 homolog [Cucumis sativus]	chr3	23982921	up2kb	23982978	up2kb	BNv1_03G08810	-	SWIB/MDM2 domain	SWI/SNF complex component SNF12 homolog [Cucumis sativus]
BN-CPG4450	chr3	23469481	down2kb	23469524	down2kb	CsaV3_3G027070.1	-		-	chr3	23990648	down2kb	23990738	down2kb	BNv1_03G08811	-		-
BN-HDR4452	chr3	23482478	down2kb	23482508	down2kb	CsaV3_3G027120.1	-		-	chr3	24003737	-	24003807	-	-	-		-
BN-CPG4451	chr3	23481984	down2kb	23482029	down2kb	CsaV3_3G027120.1	-		-	chr3	24003173	-	24003268	-	-	-		-
BN-CPG4451	chr3	23481984	-	23482029	-	-	-		-	chr3	24003173	up2kb	24003268	up2kb	BNv1_03G08814	-		-
BN-CPL4453	chr3	23483350	exon1	23483425	up2kb	CsaV3_3G027120.1	-		-	chr3	24004651	-	24004658	-	-	-		-
BN-DEL4456	chr3	23488452	down2kb	23488506	down2kb	CsaV3_3G027130.1	-	Kelch repeat type 1	F-box/kelch-repeat protein At3g27150 [Cucumis sativus]	chr3	24009252	down2kb	24009256	down2kb	BNv1_03G08815	-	Kelch repeat type 1	F-box/kelch-repeat protein At3g27150 [Cucumis sativus]
BN-HDR4455	chr3	23487969	down2kb	23487972	down2kb	CsaV3_3G027130.1	-	Kelch repeat type 1	F-box/kelch-repeat protein At3g27150 [Cucumis sativus]	chr3	24008606	-	24008777	-	-	-		-
BN-HDR4457	chr3	23552405	down2kb	23552486	down2kb	CsaV3_3G027190.1	-		-	chr3	24073165	down2kb	24073258	down2kb	BNv1_03G08821	-		-
BN-HDR4458	chr3	23554812	up2kb	23554923	up2kb	CsaV3_3G027190.1	-		-	chr3	24075579	up2kb	24075669	up2kb	BNv1_03G08821	-		-
BN-HDR4458	chr3	23554812	intron1	23554923	intron1	CsaV3_3G027200.1	-	EF-hand domain	putative calcium-binding protein CML19 [Cucumis sativus]	chr3	24075579	intron1	24075669	intron1	BNv1_03G08822	-	EF-hand domain	putative calcium-binding protein CML19 [Cucumis sativus]
BN-CPL4462	chr3	23641795	intron8	23642099	intron8	CsaV3_3G027310.1	+	HAUS augmin-like complex subunit 6, N-terminal	uncharacterized protein LOC101218866 [Cucumis sativus]	chr3	24165088	intron8	24165242	intron8	BNv1_03G08832	+	HAUS augmin-like complex subunit 6, N-terminal	uncharacterized protein LOC101218866 [Cucumis sativus]
BN-HDR4463	chr3	23647261	intron	23649758	down2kb	CsaV3_3G027320.1	-		putative methyltransferase DDB_G0268948 [Cucumis sativus]	chr3	24170488	-	24172999	down2kb	BNv1_03G08833	-		putative methyltransferase DDB_G0268948 [Cucumis sativus]
BN-HDR4463	chr3	23647261	down2kb	23649758	intron	CsaV3_3G027310.1	+	HAUS augmin-like complex subunit 6, N-terminal	uncharacterized protein LOC101218866 [Cucumis sativus]	chr3	24170488	-	24172999	-	-	-		-
BN-HDR4464	chr3	23667586	up2kb	23667728	up2kb	CsaV3_3G027340.1	+	Alpha/beta hydrolase fold-3	probable carboxylesterase 11 [Cucumis sativus]	chr3	24190821	up2kb	24190926	up2kb	BNv1_03G08835	+	Alpha/beta hydrolase fold-3	probable carboxylesterase 11 [Cucumis sativus]
BN-HDR4464	chr3	23667586	down2kb	23667728	down2kb	CsaV3_3G027350.1	-	Zinc finger, C3HC4 RING-type	uncharacterized protein LOC101209296 [Cucumis sativus]	chr3	24190821	-	24190926	-	-	-		-
BN-HDR4464	chr3	23667586	-	23667728	-	-	-		-	chr3	24190821	up2kb	24190926	up2kb	BNv1_03G08834	-		-
BN-INS4465	chr3	23680612	down2kb	23680612	down2kb	CsaV3_3G027360.1	+	SANT/Myb domain	myb-related protein 315-like [Glycine max]	chr3	24203793	down2kb	24203862	down2kb	BNv1_03G08837	+	SANT/Myb domain	myb-related protein 315-like [Glycine max]
BN-DEL4466	chr3	23686204	up2kb	23686338	up2kb	CsaV3_3G027370.1	+		-	chr3	24209474	up2kb	24209474	up2kb	BNv1_03G08838	+		-
BN-HDR4467	chr3	23706414	intron1	23706414	intron1	CsaV3_3G027400.1	+	Domain of unknown function DUF1713	uncharacterized protein LOC101220058 [Cucumis sativus]	chr3	24230061	up2kb	24230111	up2kb	BNv1_03G08841	+	Domain of unknown function DUF1713	uncharacterized protein LOC101220058 [Cucumis sativus]
BN-HDR4468	chr3	23707373	intron1	23707712	intron1	CsaV3_3G027400.1	+	Domain of unknown function DUF1713	uncharacterized protein LOC101220058 [Cucumis sativus]	chr3	24231076	up2kb	24231442	up2kb	BNv1_03G08841	+	Domain of unknown function DUF1713	uncharacterized protein LOC101220058 [Cucumis sativus]
BN-CPL4469	chr3	23714314	up2kb	23714407	exon1	CsaV3_3G027410.1	+	Serine aminopeptidase, S33	alpha/beta hydrolase domain-containing protein 17B [Cucumis sativus]	chr3	24238022	up2kb	24238061	up2kb	BNv1_03G08842	+	Serine aminopeptidase, S33	alpha/beta hydrolase domain-containing protein 17B [Cucumis sativus]
BN-HDR4471	chr3	23726908	down2kb	23727164	down2kb	CsaV3_3G027430.1	+		-	chr3	24250542	down2kb	24250829	down2kb	BNv1_03G08843	+		-
BN-DUP6806	chr3	23745427	down2kb	23746787	intron	CsaV3_3G027450.1	+	UDP-glucuronosyl/UDP-glucosyltransferase	UDP-glycosyltransferase 74E2-like [Cucumis sativus]	chr4	15528373	-	15529720	-	-	-		-
BN-CPL4472	chr3	23848994	intron2	23849062	intron2	CsaV3_3G027550.1	+	PQ-loop repeat	cystinosin homolog isoform X2 [Cucumis sativus]	chr3	24372665	intron2	24372698	intron2	BNv1_03G08856	+	PQ-loop repeat	cystinosin homolog isoform X2 [Cucumis sativus]
BN-DEL4474	chr3	23909066	exon1	23909142	down2kb	CsaV3_3G027630.1	+	Ribonucleotide reductase small subunit family	Ribonucleoside-diphosphate reductase small chain [Cucumis sativus]	chr3	24432652	down2kb	24432652	down2kb	BNv1_03G08864	+	Ribonucleotide reductase small subunit family	Ribonucleoside-diphosphate reductase small chain [Cucumis sativus]
BN-HDR4475	chr3	23909802	down2kb	23909929	down2kb	CsaV3_3G027630.1	+	Ribonucleotide reductase small subunit family	Ribonucleoside-diphosphate reductase small chain [Cucumis sativus]	chr3	24433299	down2kb	24433482	down2kb	BNv1_03G08864	+	Ribonucleotide reductase small subunit family	Ribonucleoside-diphosphate reductase small chain [Cucumis sativus]
BN-CPG4476	chr3	23919057	down2kb	23919065	down2kb	CsaV3_3G027640.1	+		translocon-associated protein subunit beta [Cucumis sativus]	chr3	24442592	down2kb	24442686	down2kb	BNv1_03G08865	+		translocon-associated protein subunit beta [Cucumis sativus]
BN-DEL4477	chr3	23919803	down2kb	23919958	down2kb	CsaV3_3G027640.1	+		translocon-associated protein subunit beta [Cucumis sativus]	chr3	24443433	down2kb	24443433	down2kb	BNv1_03G08865	+		translocon-associated protein subunit beta [Cucumis sativus]
BN-HDR4478	chr3	23922559	up2kb	23923515	exon1	CsaV3_3G027650.1	+	Cysteine-rich transmembrane CYSTM domain	-	chr3	24446017	up2kb	24447121	up2kb	BNv1_03G08866	+		-
BN-CPL4483	chr3	23940154	down2kb	23940303	intron	CsaV3_3G027680.1	+		-	chr3	24464003	-	24464073	-	-	-		-
BN-HDR4481	chr3	23937862	up2kb	23938075	exon1	CsaV3_3G027680.1	+		-	chr3	24461688	-	24461847	-	-	-		-
BN-HDR4482	chr3	23938446	down2kb	23938446	down2kb	CsaV3_3G027680.1	+		-	chr3	24462221	-	24462273	-	-	-		-
BN-HDR4489	chr3	23996459	down2kb	23996736	down2kb	CsaV3_3G027690.1	-	Mitochondrial substrate/solute carrier	mitochondrial phosphate carrier protein 3, mitochondrial-like [Cucumis sativus]	chr3	24524585	down2kb	24525076	down2kb	BNv1_03G08869	-	Mitochondrial substrate/solute carrier	mitochondrial phosphate carrier protein 3, mitochondrial-like [Cucumis sativus]
BN-DUP2828	chr3	20465017	-	20468045	-	-	-		-	chr3	20429254	up2kb	20432228	-	BNv1_03G08618	-	Myc-type, basic helix-loop-helix (bHLH) domain	unknown [Lotus japonicus]
BN-DUP2829	chr3	20467524	-	20470551	-	-	-		-	chr3	20429254	up2kb	20432228	-	BNv1_03G08618	-	Myc-type, basic helix-loop-helix (bHLH) domain	unknown [Lotus japonicus]
BN-INS4252	chr3	20581313	-	20581316	-	-	-		-	chr3	20562244	down2kb	20562352	down2kb	BNv1_03G08628	+	TMEM14 family	UPF0136 membrane protein At2g26240 [Cucumis sativus]
BN-DUP8555	chr6	14004683	-	14005073	-	-	-		-	chr3	21102200	-	21102591	up2kb	BNv1_03G08660	+		-
BN-DUP9733	chr7	9532051	-	9532442	-	-	-		-	chr3	21102200	-	21102591	up2kb	BNv1_03G08660	+		-
BN-INVDP5368	chr1	14614733	-	14616661	-	-	-		-	chr3	21400254	up2kb	21402168	-	BNv1_03G08682	-		-
BN-INVDP7793	chr5	14389169	-	14389471	-	-	-		-	chr3	21400172	up2kb	21400475	up2kb	BNv1_03G08682	-		-
BN-DEL4316	chr3	21470572	-	21470625	-	-	-		-	chr3	21425190	down2kb	21425190	down2kb	BNv1_03G08684	+	AP2/ERF domain	ethylene-responsive transcription factor TINY-like [Cucumis sativus]
BN-INVDP7506	chr4	24329830	-	24332591	-	-	-		-	chr3	21511777	-	21514529	down2kb	BNv1_03G08688	-	WD40 repeat	protein transport protein SEC13 homolog B [Cucumis sativus]
BN-DUP9021	chr6	24014249	-	24018671	-	-	-		-	chr3	22722933	-	22727329	up2kb	BNv1_03G08724	+		-
BN-DUP4943	chr1	9663805	-	9665574	-	-	-		-	chr3	22851644	up2kb	22853404	down2kb	BNv1_03G08727	+		putative G3BP-like protein [Cucumis sativus]
BN-TDM4410	chr3	22315094	-	22315176	-	-	-		-	chr3	22859314	down2kb	22859372	-	BNv1_03G08728	+		-
BN-INVDP4377	chr3	8985283	-	8987194	-	-	-		-	chr3	22856098	up2kb	22858012	down2kb	BNv1_03G08728	+		-
BN-INVDP9728	chr7	9520885	-	9526826	-	-	-		-	chr3	22999107	up2kb	23005026	-	BNv1_03G08740	-		uncharacterized protein LOC101206322 [Cucumis sativus]
BN-INVDP9728	chr7	9520885	-	9526826	-	-	-		-	chr3	22999107	-	23005026	down2kb	BNv1_03G08741	+		-
BN-DUP8374	chr6	7831406	-	7836726	-	-	-		-	chr3	23729160	-	23734756	down2kb	BNv1_03G08794	-	Oligopeptide transporter, OPT superfamily	probable metal-nicotianamine transporter YSL6 [Cucumis sativus]
BN-DUP6430	chr2	24554478	-	24557909	-	-	-		-	chr3	24122226	intron9	24125418	intron9	BNv1_03G08826	+	Rubisco LSMT, substrate-binding domain	ribulose-1,5 bisphosphate carboxylase/oxygenase large subunit N-methyltransferase, chloroplastic [Cucumis sativus]
BN-HDR4554	chr3	25254450	down2kb	25255000	intron	CsaV3_3G028680.1	+		-	chr3	25919763	down2kb	25920378	-	BNv1_03G08958	+		-
BN-HDR4554	chr3	25254450	up2kb	25255000	up2kb	CsaV3_3G028690.1	+		uncharacterized protein LOC101207451 isoform X1 [Cucumis sativus]	chr3	25919763	up2kb	25920378	up2kb	BNv1_03G08959	+		uncharacterized protein LOC101207451 isoform X1 [Cucumis sativus]
BN-HDR4556	chr3	25272365	up2kb	25272758	up2kb	CsaV3_3G028700.1	-	Pectate lyase/Amb allergen	probable pectate lyase 8 [Cucumis sativus]	chr3	25937688	up2kb	25937975	up2kb	BNv1_03G08960	-	Pectate lyase/Amb allergen	probable pectate lyase 8 [Cucumis sativus]
BN-HDR4560	chr3	25400986	down2kb	25401049	down2kb	CsaV3_3G028780.1	-	DNA/RNA-binding protein Alba-like	Alba DNA/RNA-binding protein isoform 1 [Theobroma cacao]	chr3	26066004	down2kb	26066040	down2kb	BNv1_03G08968	-	DNA/RNA-binding protein Alba-like	Alba DNA/RNA-binding protein isoform 1 [Theobroma cacao]
BN-HDR4561	chr3	25401838	down2kb	25401986	down2kb	CsaV3_3G028780.1	-	DNA/RNA-binding protein Alba-like	Alba DNA/RNA-binding protein isoform 1 [Theobroma cacao]	chr3	26066817	down2kb	26066919	down2kb	BNv1_03G08968	-	DNA/RNA-binding protein Alba-like	Alba DNA/RNA-binding protein isoform 1 [Theobroma cacao]
BN-CPG4562	chr3	25410635	exon1	25410658	exon1	CsaV3_3G028790.1	+	LSM domain, eukaryotic/archaea-type	hypothetical protein Csa_3G625090 [Cucumis sativus]	chr3	26075565	up2kb	26075643	up2kb	BNv1_03G08969	+	LSM domain, eukaryotic/archaea-type	hypothetical protein Csa_3G625090 [Cucumis sativus]
BN-CPG4563	chr3	25428661	up2kb	25428686	up2kb	CsaV3_3G028800.1	+	Pentatricopeptide repeat IPR004860	Pentatricopeptide repeat-containing protein isoform 1 [Theobroma cacao]	chr3	26093653	up2kb	26093706	up2kb	BNv1_03G08970	+	Pentatricopeptide repeat IPR004860	Pentatricopeptide repeat-containing protein isoform 1 [Theobroma cacao]
BN-HDR4564	chr3	25434241	intron3	25434539	intron3	CsaV3_3G028800.1	+	Pentatricopeptide repeat IPR004860	Pentatricopeptide repeat-containing protein isoform 1 [Theobroma cacao]	chr3	26099243	down2kb	26099495	-	BNv1_03G08970	+	Pentatricopeptide repeat IPR004860	Pentatricopeptide repeat-containing protein isoform 1 [Theobroma cacao]
BN-HDR4564	chr3	25434241	up2kb	25434539	up2kb	CsaV3_3G028810.1	-		-	chr3	26099243	up2kb	26099495	up2kb	BNv1_03G08971	-		-
BN-HDR4576	chr3	25596756	down2kb	25597080	down2kb	CsaV3_3G029850.1	+		-	chr3	26254137	down2kb	26254395	down2kb	BNv1_03G08980	+		-
BN-NOTAL486	chr3	25608063	intron	25610489	down2kb	CsaV3_3G029860.1	-	Exosome complex component CSL4 IPR025721	exosome complex component CSL4 [Cucumis sativus]	-	-	-	-	-	-	-		-
BN-DUP6843	chr3	25615602	intron3	25615934	intron3	CsaV3_3G029860.1	-	Exosome complex component CSL4 IPR025721	exosome complex component CSL4 [Cucumis sativus]	chr1	30234724	-	30235056	-	-	-		-
BN-DUP6843	chr3	25615602	-	25615934	-	-	-		-	chr1	30234724	intron3	30235056	intron3	BNv1_01G03351	-	RNA 3'-terminal phosphate cyclase, insert domain IPR023797	probable RNA 3'-terminal phosphate cyclase-like protein [Cucumis sativus]
BN-HDR4578	chr3	25612971	intron4	25612977	intron4	CsaV3_3G029860.1	-	Exosome complex component CSL4 IPR025721	exosome complex component CSL4 [Cucumis sativus]	chr3	26261411	intron4	26261646	intron4	BNv1_03G08981	-	Exosome complex component CSL4 IPR025721	exosome complex component CSL4 [Cucumis sativus]
BN-INVDP6842	chr3	25614952	intron3	25615815	intron3	CsaV3_3G029860.1	-	Exosome complex component CSL4 IPR025721	exosome complex component CSL4 [Cucumis sativus]	chr5	13389901	-	13390766	-	-	-		-
BN-INVDP6842	chr3	25614952	-	25615815	-	-	-		-	chr5	13389901	intron6	13390766	intron6	BNv1_05G14734	+	C2 domain IPR002921	Triglyceride lipases,triglyceride lipases isoform 1 [Theobroma cacao]
BN-INVTR2237	chr3	25614407	intron3	25614953	intron3	CsaV3_3G029860.1	-	Exosome complex component CSL4 IPR025721	exosome complex component CSL4 [Cucumis sativus]	chr3	35891308	-	35891847	-	-	-		-
BN-INVTR2237	chr3	25614407	-	25614953	-	-	-		-	chr3	35891308	intron10	35891847	intron10	BNv1_03G10268	+	Chaperonin Cpn60/TCP-1 family	T-complex protein 1 subunit theta [Cucumis sativus]
BN-DEL4580	chr3	25637091	intron7	25637152	intron7	CsaV3_3G029870.1	+		NHL domain-containing protein, putative [Theobroma cacao]	chr3	26284198	-	26284198	-	-	-		-
BN-HDR4579	chr3	25628561	intron	25630752	up2kb	CsaV3_3G029870.1	+		NHL domain-containing protein, putative [Theobroma cacao]	chr3	26275718	-	26277876	-	-	-		-
BN-HDR4582	chr3	25654646	down2kb	25654697	down2kb	CsaV3_3G029890.1	+	Solute carrier family 35 member SLC35F1/F2/F6	thiamine-repressible mitochondrial transport protein THI74 [Cucumis sativus]	chr3	26301642	down2kb	26301643	down2kb	BNv1_03G08983	+	Solute carrier family 35 member SLC35F1/F2/F6	thiamine-repressible mitochondrial transport protein THI74 [Cucumis sativus]
BN-CPG4585	chr3	25682275	up2kb	25682333	up2kb	CsaV3_3G029930.1	+	BTB/POZ domain IPR027356	phototropic-responsive NPH3 family protein [Cucumis melo subsp. melo]	chr3	26329159	-	26329317	-	-	-		-
BN-HDR4586	chr3	25692698	down2kb	25692704	down2kb	CsaV3_3G029940.1	-	Cytochrome b5-like heme/steroid binding domain	cytochrome b5, seed isoform [Cucumis sativus]	chr3	26339710	down2kb	26339774	down2kb	BNv1_03G08988	-	Cytochrome b5-like heme/steroid binding domain	cytochrome b5, seed isoform [Cucumis sativus]
BN-HDR4587	chr3	25700273	intron	25701381	up2kb	CsaV3_3G029950.1	+		zinc finger family protein [Populus trichocarpa]	chr3	26347336	-	26348795	-	-	-		-
BN-HDR4588	chr3	25701695	up2kb	25701805	up2kb	CsaV3_3G029950.1	+		zinc finger family protein [Populus trichocarpa]	chr3	26349107	-	26349225	-	-	-		-
BN-HDR4589	chr3	25702319	up2kb	25702542	up2kb	CsaV3_3G029950.1	+		zinc finger family protein [Populus trichocarpa]	chr3	26349741	-	26350667	-	-	-		-
BN-HDR4590	chr3	25703178	exon1	25703743	exon1	CsaV3_3G029950.1	+		zinc finger family protein [Populus trichocarpa]	chr3	26351303	up2kb	26351870	up2kb	BNv1_03G08989	+		zinc finger family protein [Populus trichocarpa]
BN-HDR4591	chr3	25714009	up2kb	25714694	up2kb	CsaV3_3G029960.1	-		protein XRI1 [Cucumis sativus]	chr3	26362184	up2kb	26362946	up2kb	BNv1_03G08990	-		protein XRI1 [Cucumis sativus]
BN-HDR4591	chr3	25714009	down2kb	25714694	down2kb	CsaV3_3G029970.1	-		-	chr3	26362184	-	26362946	-	-	-		-
BN-INS4593	chr3	25744209	intron1	25744211	intron1	CsaV3_3G029990.1	-	B-cell receptor-associated protein 29/31	uncharacterized protein LOC101213598 [Cucumis sativus]	chr3	26392418	intron1	26392521	intron1	BNv1_03G08992	-	B-cell receptor-associated protein 29/31	uncharacterized protein LOC101213598 [Cucumis sativus]
BN-DEL4597	chr3	25871802	down2kb	25872070	down2kb	CsaV3_3G030120.1	+	U box domain IPR019734	E3 ubiquitin-protein ligase CHIP [Cucumis sativus]	chr3	26519953	down2kb	26519954	down2kb	BNv1_03G09005	+	U box domain IPR019734	E3 ubiquitin-protein ligase CHIP [Cucumis sativus]
BN-CPL4600	chr3	25888025	up2kb	25888137	up2kb	CsaV3_3G030140.1	-	GRAM domain	GEM-like protein 1 [Cucumis sativus]	chr3	26536277	up2kb	26536332	up2kb	BNv1_03G09007	-	GRAM domain	GEM-like protein 1 [Cucumis sativus]
BN-CPL4600	chr3	25888025	up2kb	25888137	up2kb	CsaV3_3G030140.1	-	GRAM domain	GEM-like protein 1 [Cucumis sativus]	chr3	26536277	down2kb	26536332	down2kb	BNv1_03G09008	-	GRAM domain	GEM-like protein 2 [Cucumis sativus]
BN-CPL4600	chr3	25888025	down2kb	25888137	down2kb	CsaV3_3G030150.1	-	GRAM domain	GEM-like protein 2 [Cucumis sativus]	chr3	26536277	down2kb	26536332	down2kb	BNv1_03G09008	-	GRAM domain	GEM-like protein 2 [Cucumis sativus]
BN-CPL4600	chr3	25888025	down2kb	25888137	down2kb	CsaV3_3G030150.1	-	GRAM domain	GEM-like protein 2 [Cucumis sativus]	chr3	26536277	up2kb	26536332	up2kb	BNv1_03G09007	-	GRAM domain	GEM-like protein 1 [Cucumis sativus]
BN-INS4599	chr3	25887683	up2kb	25887686	up2kb	CsaV3_3G030140.1	-	GRAM domain	GEM-like protein 1 [Cucumis sativus]	chr3	26535350	intron2	26535934	exon1	BNv1_03G09007	-	GRAM domain	GEM-like protein 1 [Cucumis sativus]
BN-INS4599	chr3	25887683	up2kb	25887686	up2kb	CsaV3_3G030140.1	-	GRAM domain	GEM-like protein 1 [Cucumis sativus]	chr3	26535350	down2kb	26535934	down2kb	BNv1_03G09008	-	GRAM domain	GEM-like protein 2 [Cucumis sativus]
BN-INS4599	chr3	25887683	down2kb	25887686	down2kb	CsaV3_3G030150.1	-	GRAM domain	GEM-like protein 2 [Cucumis sativus]	chr3	26535350	down2kb	26535934	down2kb	BNv1_03G09008	-	GRAM domain	GEM-like protein 2 [Cucumis sativus]
BN-INS4599	chr3	25887683	down2kb	25887686	down2kb	CsaV3_3G030150.1	-	GRAM domain	GEM-like protein 2 [Cucumis sativus]	chr3	26535350	intron2	26535934	exon1	BNv1_03G09007	-	GRAM domain	GEM-like protein 1 [Cucumis sativus]
BN-HDR4603	chr3	25903404	up2kb	25903413	up2kb	CsaV3_3G030170.1	+		-	chr3	26551592	up2kb	26551681	up2kb	BNv1_03G09010	+		-
BN-CPL4606	chr3	25933462	down2kb	25933786	down2kb	CsaV3_3G030210.1	-	UDP-glucuronosyl/UDP-glucosyltransferase	UDP-glycosyltransferase 74F2 [Cucumis sativus]	chr3	26581744	down2kb	26581905	down2kb	BNv1_03G09015	-	UDP-glucuronosyl/UDP-glucosyltransferase	UDP-glycosyltransferase 74F2 [Cucumis sativus]
BN-HDR4607	chr3	25950142	exon1	25950142	exon1	CsaV3_3G030220.1	-	UDP-glucuronosyl/UDP-glucosyltransferase	UDP-glycosyltransferase 74F1-like [Cucumis sativus]	chr3	26598300	exon2	26598382	intron1	BNv1_03G09016	-	UDP-glucuronosyl/UDP-glucosyltransferase	UDP-glycosyltransferase 74F1-like [Cucumis sativus]
BN-CPL4612	chr3	26019176	intron1	26019289	intron1	CsaV3_3G030280.1	+		-	chr3	26667354	intron1	26667363	intron1	BNv1_03G09022	+		-
BN-CPL4612	chr3	26019176	intron1	26019289	intron1	CsaV3_3G030290.1	+	Amino acid/polyamine transporter I	hypothetical protein POPTR_0003s10260g [Populus trichocarpa]	chr3	26667354	-	26667363	-	-	-		-
BN-CPL4614	chr3	26027019	down2kb	26027163	down2kb	CsaV3_3G030290.1	+	Amino acid/polyamine transporter I	hypothetical protein POPTR_0003s10260g [Populus trichocarpa]	chr3	26675017	down2kb	26675041	down2kb	BNv1_03G09023	+	Amino acid/polyamine transporter I	Amino acid permease family protein [Theobroma cacao]
BN-CPL4614	chr3	26027019	intron	26027163	down2kb	CsaV3_3G030300.1	-	Tensin phosphatase, C2 domain IPR015425	Formin [Theobroma cacao]	chr3	26675017	down2kb	26675041	down2kb	BNv1_03G09024	-	Tensin phosphatase, C2 domain IPR015425	Formin [Theobroma cacao]
BN-DEL4613	chr3	26025737	exon4	26025791	exon4	CsaV3_3G030290.1	+	Amino acid/polyamine transporter I	hypothetical protein POPTR_0003s10260g [Populus trichocarpa]	chr3	26673789	down2kb	26673790	down2kb	BNv1_03G09023	+	Amino acid/polyamine transporter I	Amino acid permease family protein [Theobroma cacao]
BN-DEL4613	chr3	26025737	-	26025791	-	-	-		-	chr3	26673789	down2kb	26673790	down2kb	BNv1_03G09024	-	Tensin phosphatase, C2 domain IPR015425	Formin [Theobroma cacao]
BN-INS4615	chr3	26092331	up2kb	26092332	up2kb	CsaV3_3G030330.1	+		cadmium-induced protein AS8 isoform X3 [Cucumis sativus]	chr3	26740201	-	26740325	-	-	-		-
BN-HDR4617	chr3	26146929	intron	26148739	down2kb	CsaV3_3G030370.1	-	SANT/Myb domain IPR025756	myb family transcription factor APL [Cucumis sativus]	chr3	26794903	-	26795116	-	-	-		-
BN-HDR4618	chr3	26150142	down2kb	26150229	down2kb	CsaV3_3G030370.1	-	SANT/Myb domain IPR025756	myb family transcription factor APL [Cucumis sativus]	chr3	26796506	-	26796725	-	-	-		-
BN-HDR4620	chr3	26184192	intron2	26184192	intron2	CsaV3_3G030410.1	+	AMP-dependent synthetase/ligase IPR025110	4-coumarate--CoA ligase-like 6 [Cucumis sativus]	chr3	26830758	-	26830834	-	-	-		-
BN-HDR4622	chr3	26207485	down2kb	26207923	down2kb	CsaV3_3G030440.1	-	Phosphoribulokinase/uridine kinase	phosphoribulokinase, chloroplastic [Cucumis sativus]	chr3	26854048	down2kb	26854117	down2kb	BNv1_03G09036	-	Phosphoribulokinase/uridine kinase	phosphoribulokinase, chloroplastic [Cucumis sativus]
BN-HDR4623	chr3	26218538	intron	26218877	up2kb	CsaV3_3G030450.1	+	Helicase, C-terminal IPR011545	DEAD-box ATP-dependent RNA helicase 5 [Cucumis sativus]	chr3	26864722	up2kb	26864750	up2kb	BNv1_03G09037	+	Helicase, C-terminal IPR011545	DEAD-box ATP-dependent RNA helicase 5 [Cucumis sativus]
BN-CPG4625	chr3	26247567	intron6	26247630	intron6	CsaV3_3G030460.1	+	-	uncharacterized protein LOC101220521 [Cucumis sativus]	chr3	26893274	intron6	26893402	intron6	BNv1_03G09038	+		uncharacterized protein LOC101220521 [Cucumis sativus]
BN-CPG4626	chr3	26250552	intron7	26250573	intron7	CsaV3_3G030460.1	+	-	uncharacterized protein LOC101220521 [Cucumis sativus]	chr3	26896319	intron7	26896407	intron7	BNv1_03G09038	+		uncharacterized protein LOC101220521 [Cucumis sativus]
BN-DEL4624	chr3	26235329	intron1	26235383	intron1	CsaV3_3G030460.1	+	-	uncharacterized protein LOC101220521 [Cucumis sativus]	chr3	26881135	intron1	26881136	intron1	BNv1_03G09038	+		uncharacterized protein LOC101220521 [Cucumis sativus]
BN-TDM4565	chr3	25474025	-	25474222	-	-	-	-	-	chr3	26139074	down2kb	26139205	down2kb	BNv1_03G08978	+		ty1-copia retrotransposon protein [Cucumis melo subsp. melo]
BN-DUP2835	chr3	21738781	-	21739181	-	-	-	-	-	chr3	26190286	up2kb	26190685	up2kb	BNv1_03G08979	-		hypothetical protein MTR_5g095550 [Medicago truncatula]
BN-DUP2900	chr3	25562423	-	25566419	-	-	-	-	-	chr3	26185688	down2kb	26189680	intron2	BNv1_03G08979	-		hypothetical protein MTR_5g095550 [Medicago truncatula]
BN-INVDP4430	chr3	25527759	-	25528375	-	-	-	-	-	chr3	26189675	intron2	26190290	up2kb	BNv1_03G08979	-		hypothetical protein MTR_5g095550 [Medicago truncatula]
BN-INVDP4434	chr3	25550898	-	25555663	-	-	-	-	-	chr3	26181056	-	26185770	down2kb	BNv1_03G08979	-		hypothetical protein MTR_5g095550 [Medicago truncatula]
BN-INVDP9373	chr7	6872972	-	6877346	-	-	-	-	-	chr3	26190435	up2kb	26194813	-	BNv1_03G08979	-		hypothetical protein MTR_5g095550 [Medicago truncatula]
BN-NOTAL1985	-	-	-	-	-	-	-	-	-	chr3	26258686	down2kb	26258939	down2kb	BNv1_03G08981	-	Exosome complex component CSL4 IPR025721	exosome complex component CSL4 [Cucumis sativus]
BN-INVDP4378	chr3	9554785	-	9555677	-	-	-	-	-	chr3	26564294	up2kb	26565175	up2kb	BNv1_03G09012	-		probable beta-1,4-xylosyltransferase IRX10L [Vitis vinifera]

## Sheet: Table S7
Table S7 SV-Genes on LTT loci
	CL Genome									XIS49 Genome
SV_ID	SV-chr	SV-start	SV-start-position	SV-end	SV-end-position	SV-gene	SV-gene strain	Interpro-annot	Nr-annot	SV-chr	SV-start	SV-start-position	SV-end	SV-end-position	SV-gene	SV-gene strain	Interpro-annot	Nr-annot
BN-CPG9513	chr6	17768692	intron8	17768722	intron8	CsaV3_6G031580.1	+	Peptidase M14, carboxypeptidase A	metallocarboxypeptidase A-like protein ARB_03789 [Cucumis sativus]	chr6	19251887	intron9	19251948	intron9	BNv1_06G18527	+	Peptidase M14, carboxypeptidase A	metallocarboxypeptidase A-like protein ARB_03789 [Cucumis sativus]
BN-CPG9513	chr6	17768692	down2kb	17768722	down2kb	CsaV3_6G031600.1	-	Pentatricopeptide repeat	pentatricopeptide repeat-containing protein At5g42310, mitochondrial [Cucumis sativus]	chr6	19251887	-	19251948	-	-	-		-
BN-CPG9519	chr6	17895429	up2kb	17895484	up2kb	CsaV3_6G031760.1	-	Alcohol dehydrogenase, C-terminal IPR013154	alcohol dehydrogenase-like 7 [Cucumis sativus]	chr6	19379825	up2kb	19379933	up2kb	BNv1_06G18547	-	Alcohol dehydrogenase, C-terminal IPR013154	alcohol dehydrogenase-like 7 [Cucumis sativus]
BN-CPG9519	chr6	17895429	down2kb	17895484	down2kb	CsaV3_6G031770.1	-	IMS import disulfide relay-system, CHCH-CHCH-like Cx9C	uncharacterized protein LOC101212239 [Cucumis sativus]	chr6	19379825	down2kb	19379933	down2kb	BNv1_06G18548	-	IMS import disulfide relay-system, CHCH-CHCH-like Cx9C	uncharacterized protein LOC101212239 [Cucumis sativus]
BN-CPG9524	chr6	17983745	intron22	17983780	intron22	CsaV3_6G031860.1	-	Ribonuclease III domain IPR001650	endoribonuclease Dicer homolog 3-like isoform X2 [Citrus sinensis]	chr6	19467958	intron21	19468030	intron21	BNv1_06G18557	-	Ribonuclease III domain IPR001650	hypothetical protein CICLE_v10007239mg [Citrus clementina]
BN-CPG9527	chr6	18021482	down2kb	18021547	down2kb	CsaV3_6G031910.1	+		uncharacterized protein LOC101211014 [Cucumis sativus]	chr6	19505771	down2kb	19505902	down2kb	BNv1_06G18561	+		uncharacterized protein LOC101211014 [Cucumis sativus]
BN-CPG9537	chr6	18223103	intron14	18223135	intron14	CsaV3_6G032190.1	-	Peptidase C50, separase	separase isoform X2 [Vitis vinifera]	chr6	19701214	intron14	19701281	intron14	BNv1_06G18586	-	Peptidase C50, separase	separase isoform X2 [Vitis vinifera]
BN-CPG9538	chr6	18264676	up2kb	18264736	up2kb	CsaV3_6G032230.1	-		Microtubule-associated protein 65-8 isoform 1 [Theobroma cacao]	chr6	19742975	up2kb	19743097	up2kb	BNv1_06G18591	-		Microtubule-associated protein 65-8 isoform 1 [Theobroma cacao]
BN-CPG9538	chr6	18264676	intron3	18264736	intron3	CsaV3_6G032240.1	+	Transcription factor CBF/NF-Y/archaeal histone domain	DNA polymerase epsilon subunit C [Cucumis sativus]	chr6	19742975	-	19743097	-	-	-		-
BN-CPG9538	chr6	18264676	down2kb	18264736	down2kb	CsaV3_6G032250.1	-	Exostosin-like	probable arabinosyltransferase ARAD1 [Cucumis sativus]	chr6	19742975	-	19743097	-	-	-		-
BN-CPG9562	chr6	18714038	intron6	18714194	intron6	CsaV3_6G033890.1	-	Translin family	translin-associated protein X [Cucumis sativus]	chr6	20096717	intron6	20097029	intron6	BNv1_06G18646	-	Translin family	translin-associated protein X [Cucumis sativus]
BN-CPG9626	chr6	20029449	intron1	20029555	intron1	CsaV3_6G036070.1	-	Glutathione-dependent formaldehyde-activating enzyme/centromere protein V	hypothetical protein Csa_6G403060 [Cucumis sativus]	chr6	21385568	up2kb	21385783	up2kb	BNv1_06G18762	-	Glutathione-dependent formaldehyde-activating enzyme/centromere protein V	hypothetical protein Csa_6G403060 [Cucumis sativus]
BN-CPG9631	chr6	20137870	down2kb	20137914	down2kb	CsaV3_6G036230.1	+	Carbohydrate kinase, FGGY, N-terminal IPR018485	xylulose kinase [Cucumis sativus]	chr6	21494000	intron19	21494093	down2kb	BNv1_06G18774	+	Serine-threonine/tyrosine-protein kinase, catalytic domain IPR018484	xylulose kinase [Cucumis sativus]
BN-CPG9637	chr6	20181311	down2kb	20181368	down2kb	CsaV3_6G036310.1	+	AP2/ERF domain	hypothetical protein POPTR_0010s10290g [Populus trichocarpa]	chr6	21534219	intron5	21534334	intron5	BNv1_06G18782	+	AP2/ERF domain	ethylene-responsive transcription factor WRI1-like [Glycine max]
BN-CPG9637	chr6	20181311	up2kb	20181368	up2kb	CsaV3_6G036320.1	+		ethylene-responsive transcription factor WRI1-like [Glycine max]	chr6	21534219	intron5	21534334	intron5	BNv1_06G18782	+	AP2/ERF domain	ethylene-responsive transcription factor WRI1-like [Glycine max]
BN-CPG9640	chr6	20189174	intron2	20189179	intron2	CsaV3_6G036340.1	+	Dehydrogenase, E1 component	pyruvate dehydrogenase E1 component subunit alpha-1, mitochondrial-like [Cucumis sativus]	chr6	21542122	intron2	21542293	intron2	BNv1_06G18784	+	Dehydrogenase, E1 component	pyruvate dehydrogenase E1 component subunit alpha-1, mitochondrial-like [Cucumis sativus]
BN-CPG9647	chr6	20290787	up2kb	20290801	up2kb	CsaV3_6G036490.1	-		-	chr6	21640743	up2kb	21641399	up2kb	BNv1_06G18799	-		-
BN-CPG9690	chr6	21118626	intron7	21118843	intron7	CsaV3_6G037410.1	-	Phosphatidylinositol-4-phosphate 5-kinase, core IPR003409	phosphatidylinositol 4-phosphate 5-kinase 8 isoform X2 [Fragaria vesca subsp. vesca]	chr6	22478395	intron7	22478839	intron7	BNv1_06G18887	-	Phosphatidylinositol-4-phosphate 5-kinase, core IPR003409	phosphatidylinositol 4-phosphate 5-kinase 8 isoform X2 [Fragaria vesca subsp. vesca]
BN-CPG9711	chr6	21261986	down2kb	21262011	down2kb	CsaV3_6G037560.1	+	UDP-glucuronosyl/UDP-glucosyltransferase	UDP-glycosyltransferase 74E2-like [Cucumis sativus]	chr6	22624435	down2kb	22624488	down2kb	BNv1_06G18900	+	UDP-glucuronosyl/UDP-glucosyltransferase	UDP-glycosyltransferase 74E2-like [Cucumis sativus]
BN-CPG9711	chr6	21261986	down2kb	21262011	down2kb	CsaV3_6G037570.1	-	PMR5 N-terminal domain IPR026057	protein trichome birefringence-like 42 [Cucumis sativus]	chr6	22624435	down2kb	22624488	down2kb	BNv1_06G18901	-	PMR5 N-terminal domain IPR026057	protein trichome birefringence-like 42 [Cucumis sativus]
BN-CPG9736	chr6	21463689	exon1	21463714	exon1	CsaV3_6G037900.1	+	Alpha crystallin/Hsp20 domain	uncharacterized protein LOC101211982 [Cucumis sativus]	chr6	22824963	up2kb	22825012	up2kb	BNv1_06G18932	+	Alpha crystallin/Hsp20 domain	uncharacterized protein LOC101211982 [Cucumis sativus]
BN-CPG9746	chr6	21672020	up2kb	21672031	up2kb	CsaV3_6G038150.1	-	Copper amine oxidase, C-terminal IPR015800	primary amine oxidase [Vitis vinifera]	chr6	23033312	up2kb	23033376	up2kb	BNv1_06G18957	-	Copper amine oxidase, C-terminal IPR015800	primary amine oxidase [Vitis vinifera]
BN-CPG9749	chr6	21762947	intron7	21762962	intron7	CsaV3_6G038240.1	-	CBS domain IPR001807	hypothetical protein Csa_6G425060 [Cucumis sativus]	chr6	23124479	intron7	23124581	intron7	BNv1_06G18968	-	CBS domain IPR001807	hypothetical protein Csa_6G425060 [Cucumis sativus]
BN-CPG9750	chr6	21763299	intron6	21763313	intron6	CsaV3_6G038240.1	-	CBS domain IPR001807	hypothetical protein Csa_6G425060 [Cucumis sativus]	chr6	23124917	intron6	23125085	intron6	BNv1_06G18968	-	CBS domain IPR001807	hypothetical protein Csa_6G425060 [Cucumis sativus]
BN-CPG9755	chr6	21835367	-	21835573	-	-	-		-	chr6	23197298	intron16	23197712	intron16	BNv1_06G18977	-	Protein kinase domain	mitogen-activated protein kinase kinase kinase NPK1 isoform X2 [Cucumis sativus]
BN-CPG9757	chr6	21844673	-	21844765	-	-	-		-	chr6	23206812	down2kb	23207000	down2kb	BNv1_06G18978	+	Mitochondrial substrate/solute carrier	peroxisomal adenine nucleotide carrier 1-like [Cucumis sativus]
BN-CPG9757	chr6	21844673	-	21844765	-	-	-		-	chr6	23206812	down2kb	23207000	down2kb	BNv1_06G18979	-		uncharacterized GPI-anchored protein At5g19250-like [Cucumis sativus]
BN-CPG9765	chr6	21951324	-	21951329	-	-	-		-	chr6	23313617	up2kb	23313911	up2kb	BNv1_06G19003	-		uncharacterized protein At1g08160 [Cucumis sativus]
BN-CPG9765	chr6	21951324	-	21951329	-	-	-		-	chr6	23313617	down2kb	23313911	down2kb	BNv1_06G19004	-	Protein kinase domain	hypothetical protein PRUPE_ppa021465mg [Prunus persica]
BN-CPG9802	chr6	22598981	-	22599020	-	-	-		-	chr6	23958032	up2kb	23958112	up2kb	BNv1_06G19080	+		photosystem II 5 kDa protein, chloroplastic [Cucumis sativus]
BN-CPG9830	chr6	23075043	-	23075048	-	-	-		-	chr6	24435332	up2kb	24435398	up2kb	BNv1_06G19154	+	WD40 repeat IPR007148	WD repeat-containing protein 3 [Cucumis sativus]
BN-CPG9832	chr6	23092882	-	23092915	-	-	-		-	chr6	24453367	intron11	24453435	intron11	BNv1_06G19155	-	Amidohydrolase-related IPR008146	protein fluG-like [Cucumis sativus]
BN-CPL9542	chr6	18399035	down2kb	18399137	down2kb	CsaV3_6G032440.1	+	UVR domain IPR011722	uncharacterized protein LOC101203572 [Cucumis sativus]	chr6	19875817	down2kb	19875822	down2kb	BNv1_06G18610	+	UVR domain IPR011722	uncharacterized protein LOC101203572 [Cucumis sativus]
BN-CPL9544	chr6	18455586	up2kb	18455638	up2kb	CsaV3_6G032510.1	-	Glycoside hydrolase family 1	beta-glucosidase 40 [Cucumis sativus]	chr6	19918461	up2kb	19918472	up2kb	BNv1_06G18616	-	Glycoside hydrolase family 1	beta-glucosidase 40 [Cucumis sativus]
BN-CPL9551	chr6	18531300	up2kb	18531352	up2kb	CsaV3_6G033580.1	-	Glycoside hydrolase family 1	beta-glucosidase 40 [Cucumis sativus]	chr6	19918461	up2kb	19918472	up2kb	BNv1_06G18616	-	Glycoside hydrolase family 1	beta-glucosidase 40 [Cucumis sativus]
BN-CPL9558	chr6	18661408	intron3	18661916	intron3	CsaV3_6G033790.1	+	Transcription factor, MADS-box IPR002487	MADS-box protein CMB1 [Cucumis sativus]	chr6	20044396	intron3	20044502	intron3	BNv1_06G18637	+	Transcription factor, MADS-box IPR002487	MADS-box protein CMB1 [Cucumis sativus]
BN-CPL9559	chr6	18663558	intron4	18663647	intron4	CsaV3_6G033790.1	+	Transcription factor, MADS-box IPR002487	MADS-box protein CMB1 [Cucumis sativus]	chr6	20046180	intron4	20046221	intron4	BNv1_06G18637	+	Transcription factor, MADS-box IPR002487	MADS-box protein CMB1 [Cucumis sativus]
BN-CPL9611	chr6	19782439	intron12	19782538	intron12	CsaV3_6G035790.1	-	DNA topoisomerase, type IIA, subunit A/C-terminal IPR006691	DNA gyrase subunit A, chloroplastic/mitochondrial [Cucumis sativus]	chr6	21140844	intron12	21140890	intron12	BNv1_06G18734	-	DNA topoisomerase, type IIA, subunit A/C-terminal IPR006691	DNA gyrase subunit A, chloroplastic/mitochondrial [Cucumis sativus]
BN-CPL9634	chr6	20154170	down2kb	20154263	down2kb	CsaV3_6G036250.1	-	Band 7 domain	hypersensitive-induced response protein 1-like [Cucumis sativus]	chr6	21510302	down2kb	21510346	down2kb	BNv1_06G18776	-	Band 7 domain	hypersensitive-induced response protein 1-like [Cucumis sativus]
BN-CPL9636	chr6	20174561	-	20174617	-	-	-		-	chr6	21527547	up2kb	21527552	up2kb	BNv1_06G18781	-	Formin, FH2 domain	formin-like protein 4 [Cucumis sativus]
BN-CPL9639	chr6	20185509	down2kb	20185715	down2kb	CsaV3_6G036330.1	+	Cupin 1	germin-like protein subfamily 1 member 1 [Cucumis sativus]	chr6	21538564	down2kb	21538667	down2kb	BNv1_06G18783	+	Cupin 1	germin-like protein subfamily 1 member 1 [Cucumis sativus]
BN-CPL9639	chr6	20185509	up2kb	20185715	up2kb	CsaV3_6G036340.1	+	Dehydrogenase, E1 component	pyruvate dehydrogenase E1 component subunit alpha-1, mitochondrial-like [Cucumis sativus]	chr6	21538564	up2kb	21538667	up2kb	BNv1_06G18784	+	Dehydrogenase, E1 component	pyruvate dehydrogenase E1 component subunit alpha-1, mitochondrial-like [Cucumis sativus]
BN-CPL9642	chr6	20232594	up2kb	20232803	up2kb	CsaV3_6G036370.1	-	Patatin-like phospholipase domain	patatin-like protein 6 [Cucumis sativus]	chr6	21582597	up2kb	21582650	up2kb	BNv1_06G18788	-	Patatin-like phospholipase domain	patatin-like protein 6 [Fragaria vesca subsp. vesca]
BN-CPL9642	chr6	20232594	up2kb	20232803	up2kb	CsaV3_6G036380.1	+	Amino acid/polyamine transporter 2	hypothetical protein CICLE_v10031308mg [Citrus clementina]	chr6	21582597	up2kb	21582650	up2kb	BNv1_06G18789	+	Amino acid/polyamine transporter 2	hypothetical protein CICLE_v10031308mg [Citrus clementina]
BN-CPL9661	chr6	20434234	intron	20434314	up2kb	CsaV3_6G036650.1	+	Small GTPase superfamily	ras-related protein RABF1 [Cucumis sativus]	chr6	21783041	up2kb	21783077	up2kb	BNv1_06G18814	+	Small GTPase superfamily	ras-related protein RABF1 [Cucumis sativus]
BN-CPL9661	chr6	20434234	up2kb	20434314	up2kb	CsaV3_6G036640.1	+		-	chr6	21783041	-	21783077	-	-	-		-
BN-CPL9662	chr6	20443808	up2kb	20443884	up2kb	CsaV3_6G036660.1	+	FAD dependent oxidoreductase IPR031656	hypothetical protein PRUPE_ppa002830mg [Prunus persica]	chr6	21792551	up2kb	21792583	up2kb	BNv1_06G18815	+	FAD dependent oxidoreductase IPR031656	hypothetical protein PRUPE_ppa002830mg [Prunus persica]
BN-CPL9692	chr6	21136191	intron4	21136345	intron4	CsaV3_6G037410.1	-	Phosphatidylinositol-4-phosphate 5-kinase, core IPR003409	phosphatidylinositol 4-phosphate 5-kinase 8 isoform X2 [Fragaria vesca subsp. vesca]	chr6	22495998	intron4	22496003	intron4	BNv1_06G18887	-	Phosphatidylinositol-4-phosphate 5-kinase, core IPR003409	phosphatidylinositol 4-phosphate 5-kinase 8 isoform X2 [Fragaria vesca subsp. vesca]
BN-CPL9692	chr6	21136191	up2kb	21136345	up2kb	CsaV3_6G037420.1	-		-	chr6	22495998	-	22496003	-	-	-		-
BN-CPL9719	chr6	21340985	up2kb	21341154	up2kb	CsaV3_6G037710.1	-	Rad60/SUMO-like domain	hypothetical protein POPTR_0014s18990g [Populus trichocarpa]	chr6	22703741	intron1	22703749	intron1	BNv1_06G18913	-	Rad60/SUMO-like domain	small ubiquitin-related modifier 2 isoform X1 [Amborella trichopoda]
BN-CPL9756	chr6	21837957	-	21838052	-	-	-		-	chr6	23200098	exon8	23200144	intron7	BNv1_06G18977	-	Protein kinase domain	mitogen-activated protein kinase kinase kinase NPK1 isoform X2 [Cucumis sativus]
BN-CPL9803	chr6	22603802	-	22603961	-	-	-		-	chr6	23962894	intron1	23962900	intron1	BNv1_06G19081	-	Protein kinase domain IPR002048	calcium-dependent protein kinase 8 [Cucumis sativus]
BN-CPL9812	chr6	22879631	-	22879771	-	-	-		-	chr6	24238622	up2kb	24238677	up2kb	BNv1_06G19124	+		hexose transporter [Vitis vinifera]
BN-CPL9812	chr6	22879631	-	22879771	-	-	-		-	chr6	24238622	up2kb	24238677	up2kb	BNv1_06G19125	+	Major facilitator, sugar transporter-like	hexose transporter [Vitis vinifera]
BN-DEL9511	chr6	17758022	intron1	17758085	intron1	CsaV3_6G031560.1	+	DSS1/SEM1	probable 26S proteasome complex subunit sem1-2 [Cucumis sativus]	chr6	19236075	up2kb	19236077	up2kb	BNv1_06G18524	+	DSS1/SEM1	probable 26S proteasome complex subunit sem1-2 [Cucumis sativus]
BN-DEL9517	chr6	17872785	down2kb	17872857	down2kb	CsaV3_6G031740.1	+	Neutral/alkaline non-lysosomal ceramidase, N-terminal IPR031331	neutral ceramidase-like [Cucumis sativus]	chr6	19355940	down2kb	19355943	down2kb	BNv1_06G18544	+	Neutral/alkaline non-lysosomal ceramidase, N-terminal IPR031331	neutral ceramidase-like [Cucumis sativus]
BN-DEL9517	chr6	17872785	intron9	17872857	intron9	CsaV3_6G031750.1	-	Alcohol dehydrogenase, C-terminal IPR013154	alcohol dehydrogenase-like 7 [Cucumis sativus]	chr6	19355940	intron7	19355943	intron7	BNv1_06G18545	-	Alcohol dehydrogenase, C-terminal IPR013154	alcohol dehydrogenase-like 7 [Cucumis sativus]
BN-DEL9520	chr6	17919127	down2kb	17919179	down2kb	CsaV3_6G031790.1	+	Ionotropic glutamate receptor IPR001638	glutamate receptor 2.7 [Cucumis sativus]	chr6	19403638	down2kb	19403638	down2kb	BNv1_06G18550	+	Ionotropic glutamate receptor IPR001638	glutamate receptor 2.7 [Cucumis sativus]
BN-DEL9521	chr6	17927436	up2kb	17927515	up2kb	CsaV3_6G031800.1	+		hypothetical protein CICLE_v10008490mg [Citrus clementina]	chr6	19411833	up2kb	19411833	up2kb	BNv1_06G18551	+		hypothetical protein CICLE_v10008490mg [Citrus clementina]
BN-DEL9531	chr6	18095688	intron6	18096258	intron6	CsaV3_6G031960.1	+		thermospermine synthase ACAULIS5 [Cucumis sativus]	chr6	19578041	intron6	19578045	intron6	BNv1_06G18566	+		thermospermine synthase ACAULIS5 [Cucumis sativus]
BN-DEL9540	chr6	18370581	intron2	18370726	intron2	CsaV3_6G032420.1	-		ankyrin repeat protein SKIP35 [Cucumis sativus]	chr6	19847585	intron2	19847589	intron2	BNv1_06G18608	-		ankyrin repeat protein SKIP35 [Cucumis sativus]
BN-DEL9540	chr6	18370581	exon7	18370726	exon7	CsaV3_6G032410.1	+	6,7-dimethyl-8-ribityllumazine synthase	6,7-dimethyl-8-ribityllumazine synthase [Cucumis sativus]	chr6	19847585	-	19847589	-	-	-		-
BN-DEL9541	chr6	18383458	intron6	18383530	intron6	CsaV3_6G032430.1	-	ABC transporter-like IPR013525	ABC-2 and Plant PDR ABC-type transporter family protein isoform 1 [Theobroma cacao]	chr6	19860317	intron6	19860317	intron6	BNv1_06G18609	-	ABC transporter-like IPR013525	ABC-2 and Plant PDR ABC-type transporter family protein isoform 1 [Theobroma cacao]
BN-DEL9564	chr6	18730984	down2kb	18731049	down2kb	CsaV3_6G033910.1	+		uncharacterized protein LOC101217989 [Cucumis sativus]	chr6	20113815	down2kb	20113816	down2kb	BNv1_06G18649	+		uncharacterized protein LOC101217989 [Cucumis sativus]
BN-DEL9564	chr6	18730984	-	18731049	-	-	-		-	chr6	20113815	up2kb	20113816	up2kb	BNv1_06G18650	+		-
BN-DEL9568	chr6	18755787	down2kb	18755972	down2kb	CsaV3_6G033950.1	-		-	chr6	20136456	down2kb	20136458	down2kb	BNv1_06G18653	-		-
BN-DEL9587	chr6	19181620	intron	19181691	up2kb	CsaV3_6G034310.1	+	Haem peroxidase, plant/fungal/bacterial	probable L-ascorbate peroxidase 6, chloroplastic isoform X1 [Cucumis sativus]	chr6	20577693	-	20577693	-	-	-		-
BN-DEL9605	chr6	19641836	up2kb	19641938	up2kb	CsaV3_6G035630.1	-		Uncharacterized protein TCM_035327 [Theobroma cacao]	chr6	21005282	up2kb	21005283	up2kb	BNv1_06G18720	-		Uncharacterized protein TCM_035327 [Theobroma cacao]
BN-DEL9677	chr6	21029623	intron2	21029762	intron2	CsaV3_6G037340.1	+	GOLD domain	transmembrane emp24 domain-containing protein p24delta3-like [Cucumis sativus]	chr6	22388353	intron2	22388354	intron2	BNv1_06G18881	+	GOLD domain	transmembrane emp24 domain-containing protein p24delta3-like [Cucumis sativus]
BN-DEL9677	chr6	21029623	up2kb	21029762	up2kb	CsaV3_6G037350.1	-		-	chr6	22388353	up2kb	22388354	up2kb	BNv1_06G18880	-		-
BN-DEL9691	chr6	21121948	intron7	21122142	intron7	CsaV3_6G037410.1	-	Phosphatidylinositol-4-phosphate 5-kinase, core IPR003409	phosphatidylinositol 4-phosphate 5-kinase 8 isoform X2 [Fragaria vesca subsp. vesca]	chr6	22481947	intron7	22481948	intron7	BNv1_06G18887	-	Phosphatidylinositol-4-phosphate 5-kinase, core IPR003409	phosphatidylinositol 4-phosphate 5-kinase 8 isoform X2 [Fragaria vesca subsp. vesca]
BN-DEL9701	chr6	21184400	exon4	21184456	exon4	CsaV3_6G037460.1	+	Myc-type, basic helix-loop-helix (bHLH) domain	uncharacterized protein LOC102625584 [Citrus sinensis]	chr6	22544295	down2kb	22544295	down2kb	BNv1_06G18890	+	Myc-type, basic helix-loop-helix (bHLH) domain	uncharacterized protein LOC102625584 [Citrus sinensis]
BN-DEL9701	chr6	21184400	up2kb	21184456	up2kb	CsaV3_6G037470.1	+	Chaperone DnaJ, C-terminal	HSP40/DnaJ peptide-binding protein, putative [Theobroma cacao]	chr6	22544295	-	22544295	-	-	-		-
BN-DEL9721	chr6	21345874	up2kb	21346503	up2kb	CsaV3_6G037720.1	+	Glycoside hydrolase family 17 IPR012946	glucan endo-1,3-beta-glucosidase 12 [Cucumis sativus]	chr6	22708395	up2kb	22708396	up2kb	BNv1_06G18914	+	Glycoside hydrolase family 17 IPR012946	glucan endo-1,3-beta-glucosidase 12 [Cucumis sativus]
BN-DEL9726	chr6	21373898	down2kb	21373959	down2kb	CsaV3_6G037760.1	+		hypothetical protein PRUPE_ppa003573mg [Prunus persica]	chr6	22735849	down2kb	22735849	down2kb	BNv1_06G18918	+		hypothetical protein PRUPE_ppa003573mg [Prunus persica]
BN-DEL9768	chr6	21999193	-	21999262	-	-	-		-	chr6	23360952	down2kb	23360953	down2kb	BNv1_06G19007	+		-
BN-DEL9791	chr6	22442059	-	22442147	-	-	-		-	chr6	23813386	intron19	23813389	intron19	BNv1_06G19061	-	SNF2-related, N-terminal domain IPR001650	chromodomain-helicase-DNA-binding protein 1-like isoform X1 [Citrus sinensis]
BN-DEL9796	chr6	22491682	-	22491743	-	-	-		-	chr6	23863108	up2kb	23863108	up2kb	BNv1_06G19066	+	Saccharopine dehydrogenase, NADP binding domain	hypothetical protein [Cucumis melo subsp. melo]
BN-DEL9797	chr6	22511027	-	22511106	-	-	-		-	chr6	23882401	up2kb	23882402	up2kb	BNv1_06G19068	-	DnaJ domain	uncharacterized protein LOC101209437 [Cucumis sativus]
BN-DEL9797	chr6	22511027	-	22511106	-	-	-		-	chr6	23882401	down2kb	23882402	down2kb	BNv1_06G19069	-		-
BN-DEL9816	chr6	22951478	-	22951533	-	-	-		-	chr6	24311361	intron2	24311365	intron2	BNv1_06G19136	+	Thioredoxin domain	thioredoxin-like 3-3 [Cucumis sativus]
BN-DEL9816	chr6	22951478	-	22951533	-	-	-		-	chr6	24311361	up2kb	24311365	up2kb	BNv1_06G19137	+	Zinc finger, RING-type	E3 ubiquitin-protein ligase RFWD3 [Cucumis sativus]
BN-DEL9820	chr6	22970515	-	22971071	-	-	-		-	chr6	24330573	down2kb	24330573	down2kb	BNv1_06G19140	-	AMP-activated protein kinase, glycogen-binding domain	uncharacterized protein LOC101203013 isoform X2 [Cucumis sativus]
BN-DEL9826	chr6	23043413	-	23043670	-	-	-		-	chr6	24404096	up2kb	24404097	up2kb	BNv1_06G19149	-	Nodulin-like IPR011701	uncharacterized protein LOC100248651 [Vitis vinifera]
BN-DEL9826	chr6	23043413	-	23043670	-	-	-		-	chr6	24404096	down2kb	24404097	down2kb	BNv1_06G19150	-		-
BN-DEL9833	chr6	23094108	-	23094318	-	-	-		-	chr6	24454628	intron10	24454632	intron10	BNv1_06G19155	-	Amidohydrolase-related IPR008146	protein fluG-like [Cucumis sativus]
BN-DUP3856	chr6	18422464	intron1	18423188	intron1	CsaV3_6G032480.1	-	WRKY domain	hypothetical protein PRUPE_ppa008480mg [Prunus persica]	chr6	12135464	-	12136194	-	-	-		-
BN-DUP3857	chr6	18480702	up2kb	18495467	intron	CsaV3_6G032550.1	-	Band 7 domain	hypothetical protein POPTR_0010s16620g [Populus trichocarpa]	chr6	19944236	intron1	19954199	-	BNv1_06G18622	-	Band 7 domain	hypothetical protein POPTR_0010s16620g [Populus trichocarpa]
BN-DUP3857	chr6	18480702	up2kb	18495467	intron	CsaV3_6G032560.1	+	Alpha/beta hydrolase fold-1	monoacylglycerol lipase ABHD6 [Cucumis sativus]	chr6	19944236	up2kb	19954199	-	BNv1_06G18623	+	Alpha/beta hydrolase fold-1	monoacylglycerol lipase ABHD6 [Cucumis sativus]
BN-DUP3857	chr6	18480702	intron	18495467	up2kb	CsaV3_6G032570.1	-	X8 domain	PLASMODESMATA CALLOSE-BINDING PROTEIN 3 [Cucumis sativus]	chr6	19944236	-	19954199	up2kb	BNv1_06G18624	-	X8 domain	PLASMODESMATA CALLOSE-BINDING PROTEIN 3 [Cucumis sativus]
BN-DUP3857	chr6	18480702	-	18495467	-	-	-		-	chr6	19944236	-	19954199	up2kb	BNv1_06G18625	+	Pentatricopeptide repeat	pentatricopeptide repeat-containing protein At1g26460, mitochondrial [Cucumis sativus]
BN-DUP3858	chr6	18495968	up2kb	18497649	intron	CsaV3_6G032570.1	-	X8 domain	PLASMODESMATA CALLOSE-BINDING PROTEIN 3 [Cucumis sativus]	chr6	20579245	-	20580922	-	-	-		-
BN-DUP3860	chr6	19570441	intron11	19570949	intron11	CsaV3_6G035590.1	-	Exonuclease, RNase T/DNA polymerase III	small RNA degrading nuclease 5 [Cucumis sativus]	chr6	17588386	-	17588880	-	-	-		-
BN-DUP3861	chr6	19570441	intron11	19570957	intron11	CsaV3_6G035590.1	-	Exonuclease, RNase T/DNA polymerase III	small RNA degrading nuclease 5 [Cucumis sativus]	chr6	11048244	-	11048753	-	-	-		-
BN-DUP3861	chr6	19570441	-	19570957	-	-	-		-	chr6	11048244	down2kb	11048753	down2kb	BNv1_06G17946	+		hypothetical protein CARUB_v10019243mg [Capsella rubella]
BN-DUP3862	chr6	19576232	intron11	19576500	intron11	CsaV3_6G035590.1	-	Exonuclease, RNase T/DNA polymerase III	small RNA degrading nuclease 5 [Cucumis sativus]	chr6	5281947	-	5282215	-	-	-		-
BN-DUP3862	chr6	19576232	-	19576500	-	-	-		-	chr6	5281947	down2kb	5282215	down2kb	BNv1_06G17277	+		topoisomerase 1-associated factor 1 [Cucumis sativus]
BN-DUP3863	chr6	19971038	down2kb	19971308	down2kb	CsaV3_6G036010.1	+	Domain of unknown function DUF676, lipase-like IPR022122	protein FAM135B-like isoform X1 [Cucumis sativus]	chr6	21329396	down2kb	21329666	down2kb	BNv1_06G18755	+	Domain of unknown function DUF676, lipase-like IPR022122	protein FAM135B-like isoform X1 [Cucumis sativus]
BN-DUP3864	chr6	20925556	down2kb	20925869	down2kb	CsaV3_6G037170.1	+	Bifunctional inhibitor/plant lipid transfer protein/seed storage helical domain	Bifunctional inhibitor/lipid-transfer protein/seed storage 2S albumin superfamily protein [Theobroma cacao]	chr6	4576423	-	4576737	-	-	-		-
BN-DUP5566	chr1	18867191	-	18868166	-	-	-		-	chr6	24264952	down2kb	24265924	-	BNv1_06G19129	+	RNA polymerase sigma-70 region 3 IPR007627	hypothetical protein Csa_6G446410 [Cucumis sativus]
BN-DUP5566	chr1	18867191	-	18868166	-	-	-		-	chr6	24264952	up2kb	24265924	up2kb	BNv1_06G19130	+	DVL	uncharacterized protein LOC102661214 [Glycine max]
BN-DUP5679	chr1	31094018	-	31094423	-	-	-		-	chr6	21378964	up2kb	21379368	-	BNv1_06G18761	-	GAF domain IPR003594	phytochrome A-like [Cucumis sativus]
BN-DUP5908	chr2	2593013	-	2594371	-	-	-		-	chr6	21567225	exon1	21568568	down2kb	BNv1_06G18786	+	Reverse transcriptase domain	reverse transcriptase [Cucumis melo subsp. melo]
BN-DUP6372	chr2	19073414	-	19073954	-	-	-		-	chr6	19920420	-	19920968	up2kb	BNv1_06G18617	+	CobW/HypB/UreG, nucleotide-binding domain IPR011629	hypothetical protein PRUPE_ppa007281mg [Prunus persica]
BN-DUP6546	chr3	17079130	-	17079820	-	-	-		-	chr6	21059859	intron1	21060549	intron1	BNv1_06G18730	+	DNA-directed RNA polymerase, subunit 2, domain 6 IPR007641	DNA-directed RNA polymerase I subunit RPA2 [Cucumis sativus]
BN-DUP6732	chr3	22298781	-	22300702	-	-	-		-	chr6	20574333	up2kb	20576259	-	BNv1_06G18688	-	Xylanase inhibitor, C-terminal IPR032861	aspartic proteinase Asp1 [Cucumis sativus]
BN-DUP6801	chr3	23330676	-	23332682	-	-	-		-	chr6	23546343	up2kb	23548354	-	BNv1_06G19025	-	Pectinesterase, catalytic	putative pectinesterase 63 [Cucumis sativus]
BN-DUP6801	chr3	23330676	-	23332682	-	-	-		-	chr6	23546343	exon1	23548354	intron3	BNv1_06G19026	+	Probable transposase, Ptta/En/Spm, plant IPR025312	hypothetical protein VITISV_019902 [Vitis vinifera]
BN-DUP8330	chr5	30636378	-	30636700	-	-	-		-	chr6	21621489	intron1	21621811	intron1	BNv1_06G18796	-	Alpha-D-phosphohexomutase, alpha/beta/alpha domain I IPR005845	uncharacterized protein LOC101204322 isoform X1 [Cucumis sativus]
BN-DUP8950	chr6	18047049	intron8	18048649	intron8	CsaV3_6G031920.1	-	IQ motif, EF-hand binding site IPR001609	myosin-15 isoform X1 [Cucumis sativus]	chr2	13425398	-	13426997	-	-	-		-
BN-DUP8950	chr6	18047049	-	18048649	-	-	-		-	chr2	13425398	intron2	13426997	intron2	BNv1_02G05008	+	GTP binding domain	hypothetical protein PHAVU_002G228800g [Phaseolus vulgaris]
BN-DUP8951	chr6	18048078	intron8	18048652	intron8	CsaV3_6G031920.1	-	IQ motif, EF-hand binding site IPR001609	myosin-15 isoform X1 [Cucumis sativus]	chr4	22991821	-	22992395	-	-	-		-
BN-DUP8951	chr6	18048078	-	18048652	-	-	-		-	chr4	22991821	intron5	22992395	intron5	BNv1_04G12774	-	Translation elongation factor EFG, V domain IPR004161	Precursor [Vitis vinifera]
BN-DUP8953	chr6	18236685	down2kb	18236969	down2kb	CsaV3_6G032200.1	+		hypothetical protein MTR_3g104620 [Medicago truncatula]	chr4	32534544	-	32534828	-	-	-		-
BN-DUP8961	chr6	18311037	intron7	18311586	intron7	CsaV3_6G032330.1	-	Proteasome, subunit alpha/beta IPR009653	proteasome subunit beta type-5 [Cucumis sativus]	chr1	23962621	-	23963167	-	-	-		-
BN-DUP8961	chr6	18311037	-	18311586	-	-	-		-	chr1	23962621	-	23963167	up2kb	BNv1_01G02678	+	Zinc finger, C3HC-like	uncharacterized protein LOC101212109 [Cucumis sativus]
BN-DUP8964	chr6	18419898	intron1	18420708	intron1	CsaV3_6G032480.1	-	WRKY domain	hypothetical protein PRUPE_ppa008480mg [Prunus persica]	chr3	465138	-	465933	-	-	-		-
BN-DUP8964	chr6	18419898	-	18420708	-	-	-		-	chr3	465138	down2kb	465933	down2kb	BNv1_03G06489	+		uncharacterized protein LOC101219661 [Cucumis sativus]
BN-DUP8995	chr6	19570441	intron11	19570947	intron11	CsaV3_6G035590.1	-	Exonuclease, RNase T/DNA polymerase III	small RNA degrading nuclease 5 [Cucumis sativus]	chr5	13584402	-	13584898	-	-	-		-
BN-DUP8995	chr6	19570441	-	19570947	-	-	-		-	chr5	13584402	intron3	13584898	intron3	BNv1_05G14742	-		uncharacterized protein LOC100265170 isoform X1 [Vitis vinifera]
BN-DUP9001	chr6	19770154	intron23	19770485	intron23	CsaV3_6G035790.1	-	DNA topoisomerase, type IIA, subunit A/C-terminal IPR006691	DNA gyrase subunit A, chloroplastic/mitochondrial [Cucumis sativus]	chr1	30234724	-	30235055	-	-	-		-
BN-DUP9001	chr6	19770154	-	19770485	-	-	-		-	chr1	30234724	intron3	30235055	intron3	BNv1_01G03351	-	RNA 3'-terminal phosphate cyclase, insert domain IPR023797	probable RNA 3'-terminal phosphate cyclase-like protein [Cucumis sativus]
BN-DUP9002	chr6	20171009	down2kb	20173172	intron	CsaV3_6G036290.1	+	Whirly transcription factor	hypothetical protein CICLE_v10032427mg [Citrus clementina]	chr3	33655459	-	33657619	-	-	-		-
BN-DUP9002	chr6	20171009	up2kb	20173172	intron	CsaV3_6G036300.1	-	Formin, FH2 domain	formin-like protein 4 [Cucumis sativus]	chr3	33655459	-	33657619	-	-	-		-
BN-DUP9002	chr6	20171009	-	20173172	-	-	-		-	chr3	33655459	down2kb	33657619	-	BNv1_03G09967	+		-
BN-DUP9002	chr6	20171009	-	20173172	-	-	-		-	chr3	33655459	intron1	33657619	intron1	BNv1_03G09968	+	Pentatricopeptide repeat IPR033443	DNA-binding protein [Cucumis melo subsp. melo]
BN-DUP9005	chr6	20217641	intron	20218883	up2kb	CsaV3_6G036360.1	+	Chorismate synthase	chorismate synthase, chloroplastic [Cucumis sativus]	chr2	2467037	-	2468306	-	-	-		-
BN-DUP9005	chr6	20217641	-	20218883	-	-	-		-	chr2	2467037	up2kb	2468306	-	BNv1_02G03970	-	Squalene cyclase, C-terminal IPR032697	Full=Isomultiflorenol synthase; Short=LcIMS1 [Luffa aegyptiaca]
BN-DUP9005	chr6	20217641	-	20218883	-	-	-		-	chr2	2467037	-	2468306	down2kb	BNv1_02G03971	-		isomultiflorenol synthase [Cucumis sativus]
BN-DUP9009	chr6	20692964	intron7	20697893	intron7	CsaV3_6G036860.1	+		Reduced epidermal fluorescence 4, putative isoform 1 [Theobroma cacao]	chr3	16684109	-	16689057	-	-	-		-
BN-DUP9011	chr6	20739682	intron	20740235	down2kb	CsaV3_6G036910.1	-	Pantoate-beta-alanine ligase	hypothetical protein PRUPE_ppa008786mg [Prunus persica]	chr3	14758333	-	14758882	-	-	-		-
BN-DUP9011	chr6	20739682	-	20740235	-	-	-		-	chr3	14758333	intron4	14758882	intron4	BNv1_03G08270	+	Membralin	uncharacterized protein LOC101205453 [Cucumis sativus]
BN-DUP9012	chr6	20741671	down2kb	20742081	down2kb	CsaV3_6G036910.1	-	Pantoate-beta-alanine ligase	hypothetical protein PRUPE_ppa008786mg [Prunus persica]	chr5	578836	-	579246	-	-	-		-
BN-DUP9012	chr6	20741671	-	20742081	-	-	-		-	chr5	578836	intron1	579246	intron1	BNv1_05G13649	+	Helicase, C-terminal IPR011545	DEAD-box ATP-dependent RNA helicase 10 [Cucumis sativus]
BN-DUP9013	chr6	20741679	down2kb	20742082	down2kb	CsaV3_6G036910.1	-	Pantoate-beta-alanine ligase	hypothetical protein PRUPE_ppa008786mg [Prunus persica]	chr4	6397885	-	6398288	-	-	-		-
BN-DUP9013	chr6	20741679	-	20742082	-	-	-		-	chr4	6397885	intron5	6398288	intron5	BNv1_04G11792	+	Zinc finger, PHD-finger IPR024986	Pearli, putative isoform 1 [Theobroma cacao]
BN-DUP9015	chr6	20890124	intron11	20890518	intron11	CsaV3_6G037120.1	-	GTP binding domain	uncharacterized protein LOC101213431 [Cucumis sativus]	chr4	18872950	-	18873344	-	-	-		-
BN-DUP9015	chr6	20890124	-	20890518	-	-	-		-	chr4	18872950	intron9	18873344	intron9	BNv1_04G12441	-	Protein kinase domain	shaggy-related protein kinase kappa [Cucumis sativus]
BN-DUP9016	chr6	21375165	down2kb	21375562	intron	CsaV3_6G037760.1	+		hypothetical protein PRUPE_ppa003573mg [Prunus persica]	chr4	18867998	-	18868395	-	-	-		-
BN-DUP9016	chr6	21375165	up2kb	21375562	up2kb	CsaV3_6G037770.1	+		hypothetical protein Csa_6G421620 [Cucumis sativus]	chr4	18867998	-	18868395	-	-	-		-
BN-DUP9016	chr6	21375165	-	21375562	-	-	-		-	chr4	18867998	intron9	18868395	intron9	BNv1_04G12441	-	Protein kinase domain	shaggy-related protein kinase kappa [Cucumis sativus]
BN-HDR9508	chr6	17736982	down2kb	17737053	down2kb	CsaV3_6G031530.1	-	Glycoside hydrolase, family 13, N-terminal IPR006047	1,4-alpha-glucan-branching enzyme 1, chloroplastic/amyloplastic-like isoform X1 [Cucumis sativus]	chr6	19214649	down2kb	19214710	down2kb	BNv1_06G18522	-	Glycoside hydrolase, family 13, N-terminal IPR006047	1,4-alpha-glucan-branching enzyme 1, chloroplastic/amyloplastic-like isoform X1 [Cucumis sativus]
BN-HDR9509	chr6	17750033	up2kb	17750792	up2kb	CsaV3_6G031540.1	+		-	chr6	19227684	-	19228465	-	-	-		-
BN-HDR9510	chr6	17751562	intron	17752226	up2kb	CsaV3_6G031550.1	+		hypothetical protein VITISV_030645 [Vitis vinifera]	chr6	19229232	-	19230262	up2kb	BNv1_06G18523	+		hypothetical protein PRUPE_ppa023832mg [Prunus persica]
BN-HDR9510	chr6	17751562	up2kb	17752226	intron1	CsaV3_6G031540.1	+		-	chr6	19229232	-	19230262	-	-	-		-
BN-HDR9512	chr6	17760876	exon3	17760989	down2kb	CsaV3_6G031560.1	+	DSS1/SEM1	probable 26S proteasome complex subunit sem1-2 [Cucumis sativus]	chr6	19238866	down2kb	19239025	down2kb	BNv1_06G18524	+	DSS1/SEM1	probable 26S proteasome complex subunit sem1-2 [Cucumis sativus]
BN-HDR9512	chr6	17760876	up2kb	17760989	up2kb	CsaV3_6G031570.1	+		BTB/POZ domain with WD40/YVTN repeat-containing protein [Arabidopsis thaliana]	chr6	19238866	up2kb	19239025	up2kb	BNv1_06G18525	+		BTB/POZ domain with WD40/YVTN repeat-containing protein [Arabidopsis thaliana]
BN-HDR9515	chr6	17821687	down2kb	17821825	exon7	CsaV3_6G031690.1	-	LOG family	cytokinin riboside 5'-monophosphate phosphoribohydrolase LOG1-like [Cucumis sativus]	chr6	19304881	down2kb	19305000	down2kb	BNv1_06G18537	-	LOG family	cytokinin riboside 5'-monophosphate phosphoribohydrolase LOG1-like [Cucumis sativus]
BN-HDR9516	chr6	17824406	up2kb	17824509	up2kb	CsaV3_6G031690.1	-	LOG family	cytokinin riboside 5'-monophosphate phosphoribohydrolase LOG1-like [Cucumis sativus]	chr6	19307543	up2kb	19307688	up2kb	BNv1_06G18537	-	LOG family	cytokinin riboside 5'-monophosphate phosphoribohydrolase LOG1-like [Cucumis sativus]
BN-HDR9525	chr6	18003982	down2kb	18004870	down2kb	CsaV3_6G031870.1	+	Ctr copper transporter	Copper transporter [Cucumis sativus]	chr6	19488226	down2kb	19489095	down2kb	BNv1_06G18558	+	Ctr copper transporter	Copper transporter [Cucumis sativus]
BN-HDR9525	chr6	18003982	up2kb	18004870	up2kb	CsaV3_6G031880.1	-		-	chr6	19488226	-	19489095	-	-	-		-
BN-HDR9526	chr6	18011395	intron1	18011489	intron1	CsaV3_6G031890.1	+	Alpha/beta hydrolase fold-1	epoxide hydrolase 4-like [Cucumis sativus]	chr6	19495632	intron1	19495761	intron1	BNv1_06G18559	+	Alpha/beta hydrolase fold-1	epoxide hydrolase 4-like [Cucumis sativus]
BN-HDR9528	chr6	18021807	down2kb	18022356	down2kb	CsaV3_6G031910.1	+		uncharacterized protein LOC101211014 [Cucumis sativus]	chr6	19506160	down2kb	19506688	down2kb	BNv1_06G18561	+		uncharacterized protein LOC101211014 [Cucumis sativus]
BN-HDR9528	chr6	18021807	intron	18022356	down2kb	CsaV3_6G031920.1	-	IQ motif, EF-hand binding site IPR001609	myosin-15 isoform X1 [Cucumis sativus]	chr6	19506160	-	19506688	-	-	-		-
BN-HDR9532	chr6	18116430	down2kb	18116751	down2kb	CsaV3_6G032000.1	-		uncharacterized protein LOC101209292 [Cucumis sativus]	chr6	19598258	down2kb	19598628	down2kb	BNv1_06G18569	-		uncharacterized protein LOC101209292 [Cucumis sativus]
BN-HDR9539	chr6	18285115	down2kb	18285341	down2kb	CsaV3_6G032260.1	+	Peptidase M28	endoplasmic reticulum metallopeptidase 1 [Cucumis sativus]	chr6	19763522	down2kb	19763731	down2kb	BNv1_06G18593	+	Peptidase M28	endoplasmic reticulum metallopeptidase 1 [Cucumis sativus]
BN-HDR9539	chr6	18285115	up2kb	18285341	up2kb	CsaV3_6G032270.1	+	Ribosomal protein L22/L17	60S ribosomal protein L17-2 [Cucumis sativus]	chr6	19763522	up2kb	19763731	up2kb	BNv1_06G18594	+	Ribosomal protein L22/L17	60S ribosomal protein L17-2 [Cucumis sativus]
BN-HDR9543	chr6	18451312	intron1	18451792	intron1	CsaV3_6G032510.1	-	Glycoside hydrolase family 1	beta-glucosidase 40 [Cucumis sativus]	chr6	19914073	intron1	19914628	intron1	BNv1_06G18616	-	Glycoside hydrolase family 1	beta-glucosidase 40 [Cucumis sativus]
BN-HDR9545	chr6	18456509	intron	18456817	up2kb	CsaV3_6G032520.1	+	CobW/HypB/UreG, nucleotide-binding domain IPR011629	hypothetical protein PRUPE_ppa007281mg [Prunus persica]	chr6	19919340	-	19919541	-	-	-		-
BN-HDR9549	chr6	18518447	down2kb	18519511	exon2	CsaV3_6G033570.1	-	UDP-glucose/GDP-mannose dehydrogenase, N-terminal IPR014026	UDP-glucose 6-dehydrogenase 1 [Cucumis sativus]	chr6	19905649	down2kb	19906554	down2kb	BNv1_06G18615	-	UDP-glucose/GDP-mannose dehydrogenase, N-terminal IPR014026	UDP-glucose 6-dehydrogenase 1 [Cucumis sativus]
BN-HDR9550	chr6	18527017	intron1	18527497	intron1	CsaV3_6G033580.1	-	Glycoside hydrolase family 1	beta-glucosidase 40 [Cucumis sativus]	chr6	19914073	intron1	19914628	intron1	BNv1_06G18616	-	Glycoside hydrolase family 1	beta-glucosidase 40 [Cucumis sativus]
BN-HDR9552	chr6	18532223	up2kb	18532531	up2kb	CsaV3_6G033590.1	+		-	chr6	19919340	-	19919541	-	-	-		-
BN-HDR9553	chr6	18533404	intron	18533592	up2kb	CsaV3_6G033600.1	+	CobW/HypB/UreG, nucleotide-binding domain IPR011629	hypothetical protein PRUPE_ppa007281mg [Prunus persica]	chr6	19920420	-	19920975	up2kb	BNv1_06G18617	+	CobW/HypB/UreG, nucleotide-binding domain IPR011629	hypothetical protein PRUPE_ppa007281mg [Prunus persica]
BN-HDR9553	chr6	18533404	up2kb	18533592	intron1	CsaV3_6G033590.1	+		-	chr6	19920420	-	19920975	-	-	-		-
BN-HDR9557	chr6	18565188	down2kb	18566031	down2kb	CsaV3_6G033640.1	+	Alpha/beta hydrolase fold-1	monoacylglycerol lipase ABHD6 [Cucumis sativus]	chr6	19948143	down2kb	19949034	down2kb	BNv1_06G18623	+	Alpha/beta hydrolase fold-1	monoacylglycerol lipase ABHD6 [Cucumis sativus]
BN-HDR9557	chr6	18565188	intron	18566031	down2kb	CsaV3_6G033650.1	-	X8 domain	PLASMODESMATA CALLOSE-BINDING PROTEIN 3 [Cucumis sativus]	chr6	19948143	-	19949034	down2kb	BNv1_06G18624	-	X8 domain	PLASMODESMATA CALLOSE-BINDING PROTEIN 3 [Cucumis sativus]
BN-HDR9565	chr6	18744383	down2kb	18744623	down2kb	CsaV3_6G033940.1	+		-	chr6	20125643	down2kb	20125724	down2kb	BNv1_06G18652	+		-
BN-HDR9571	chr6	18805972	down2kb	18806221	down2kb	CsaV3_6G034000.1	+	Chalcone/stilbene synthase, N-terminal	chalcone synthase [Persicaria hydropiper]	chr6	20189512	down2kb	20189862	-	BNv1_06G18659	+	Chalcone/stilbene synthase, N-terminal	chalcone synthase [Persicaria hydropiper]
BN-HDR9575	chr6	18950471	up2kb	18950566	up2kb	CsaV3_6G034110.1	+		auxilin-related protein 2 isoform X2 [Cucumis sativus]	chr6	20337870	up2kb	20337939	up2kb	BNv1_06G18670	+		auxilin-related protein 2 isoform X2 [Cucumis sativus]
BN-HDR9575	chr6	18950471	up2kb	18950566	up2kb	CsaV3_6G034100.1	-	Pentatricopeptide repeat	Tetratricopeptide repeat (TPR)-like superfamily protein isoform 1 [Theobroma cacao]	chr6	20337870	-	20337939	-	-	-		-
BN-HDR9577	chr6	19045874	down2kb	19047451	intron	CsaV3_6G034180.1	+		-	chr6	20438970	-	20439730	-	-	-		-
BN-HDR9579	chr6	19056705	intron4	19057057	intron4	CsaV3_6G034190.1	+	NRAMP family	hypothetical protein Csa_6G382880 [Cucumis sativus]	chr6	20448930	intron4	20449342	intron4	BNv1_06G18677	+	NRAMP family	hypothetical protein Csa_6G382880 [Cucumis sativus]
BN-HDR9580	chr6	19092120	down2kb	19092862	intron	CsaV3_6G034220.1	+	Proteasome, subunit alpha/beta	proteasome subunit beta type-3-A [Cucumis sativus]	chr6	20484405	down2kb	20485197	-	BNv1_06G18680	+	Proteasome, subunit alpha/beta	proteasome subunit beta type-3-A [Cucumis sativus]
BN-HDR9580	chr6	19092120	exon1	19092862	down2kb	CsaV3_6G034230.1	+	Zinc finger, RING-type	E3 ubiquitin ligase BIG BROTHER-related-like [Cucumis sativus]	chr6	20484405	down2kb	20485197	down2kb	BNv1_06G18681	+	Zinc finger, RING-type	E3 ubiquitin ligase BIG BROTHER-related-like [Cucumis sativus]
BN-HDR9580	chr6	19092120	down2kb	19092862	down2kb	CsaV3_6G034240.1	-	Thioredoxin domain	thioredoxin domain-containing protein PLP3B [Cucumis sativus]	chr6	20484405	down2kb	20485197	down2kb	BNv1_06G18682	-	Thioredoxin domain	thioredoxin domain-containing protein PLP3B [Cucumis sativus]
BN-HDR9581	chr6	19096805	up2kb	19096827	up2kb	CsaV3_6G034240.1	-	Thioredoxin domain	thioredoxin domain-containing protein PLP3B [Cucumis sativus]	chr6	20489139	up2kb	20489985	up2kb	BNv1_06G18682	-	Thioredoxin domain	thioredoxin domain-containing protein PLP3B [Cucumis sativus]
BN-HDR9584	chr6	19117466	down2kb	19117466	down2kb	CsaV3_6G034250.1	+	NAC domain	NAC domain-containing protein [Cucumis sativus]	chr6	20511433	down2kb	20511496	down2kb	BNv1_06G18683	+	NAC domain	NAC domain-containing protein [Cucumis sativus]
BN-HDR9586	chr6	19148398	up2kb	19148538	up2kb	CsaV3_6G034280.1	-		-	chr6	20542530	up2kb	20542643	up2kb	BNv1_06G18686	-		-
BN-HDR9586	chr6	19148398	up2kb	19148538	up2kb	CsaV3_6G034290.1	+	Kinesin motor domain	hypothetical protein PRUPE_ppa000463mg [Prunus persica]	chr6	20542530	up2kb	20542643	up2kb	BNv1_06G18687	+	Kinesin motor domain	hypothetical protein PRUPE_ppa000463mg [Prunus persica]
BN-HDR9588	chr6	19187540	intron7	19189236	intron7	CsaV3_6G034310.1	+	Haem peroxidase, plant/fungal/bacterial	probable L-ascorbate peroxidase 6, chloroplastic isoform X1 [Cucumis sativus]	chr6	20596470	intron7	20596481	intron7	BNv1_06G18689	+	Haem peroxidase, plant/fungal/bacterial	probable L-ascorbate peroxidase 6, chloroplastic isoform X1 [Cucumis sativus]
BN-HDR9592	chr6	19221613	down2kb	19222860	intron	CsaV3_6G034330.1	+	Thioredoxin domain	Protein disulfide-isomerase [Cucumis sativus]	chr6	20629785	-	20629788	-	-	-		-
BN-HDR9606	chr6	19646648	up2kb	19649399	intron	CsaV3_6G035640.1	-		hypothetical protein PRUPE_ppa008434mg [Prunus persica]	chr6	21010020	up2kb	21010021	up2kb	BNv1_06G18721	-		uncharacterized protein LOC102660467 [Glycine max]
BN-HDR9607	chr6	19724292	down2kb	19724481	down2kb	CsaV3_6G035760.1	-	Importin-beta, N-terminal domain	exportin-7-like [Citrus sinensis]	chr6	21085451	down2kb	21085485	down2kb	BNv1_06G18731	-	Importin-beta, N-terminal domain	exportin-7-like [Citrus sinensis]
BN-HDR9609	chr6	19766794	intron26	19766971	intron26	CsaV3_6G035790.1	-	DNA topoisomerase, type IIA, subunit A/C-terminal IPR006691	DNA gyrase subunit A, chloroplastic/mitochondrial [Cucumis sativus]	chr6	21126178	intron26	21126399	intron26	BNv1_06G18734	-	DNA topoisomerase, type IIA, subunit A/C-terminal IPR006691	DNA gyrase subunit A, chloroplastic/mitochondrial [Cucumis sativus]
BN-HDR9609	chr6	19766794	down2kb	19766971	down2kb	CsaV3_6G035780.1	+	EAP30 IPR021648	vacuolar protein sorting-associated protein 36 [Cucumis sativus]	chr6	21126178	-	21126399	-	-	-		-
BN-HDR9610	chr6	19767411	intron26	19767473	intron26	CsaV3_6G035790.1	-	DNA topoisomerase, type IIA, subunit A/C-terminal IPR006691	DNA gyrase subunit A, chloroplastic/mitochondrial [Cucumis sativus]	chr6	21126839	intron26	21126840	intron26	BNv1_06G18734	-	DNA topoisomerase, type IIA, subunit A/C-terminal IPR006691	DNA gyrase subunit A, chloroplastic/mitochondrial [Cucumis sativus]
BN-HDR9610	chr6	19767411	down2kb	19767473	down2kb	CsaV3_6G035780.1	+	EAP30 IPR021648	vacuolar protein sorting-associated protein 36 [Cucumis sativus]	chr6	21126839	-	21126840	-	-	-		-
BN-HDR9612	chr6	19782757	intron12	19783121	intron12	CsaV3_6G035790.1	-	DNA topoisomerase, type IIA, subunit A/C-terminal IPR006691	DNA gyrase subunit A, chloroplastic/mitochondrial [Cucumis sativus]	chr6	21141109	intron12	21141177	intron12	BNv1_06G18734	-	DNA topoisomerase, type IIA, subunit A/C-terminal IPR006691	DNA gyrase subunit A, chloroplastic/mitochondrial [Cucumis sativus]
BN-HDR9613	chr6	19790901	intron3	19791164	intron3	CsaV3_6G035790.1	-	DNA topoisomerase, type IIA, subunit A/C-terminal IPR006691	DNA gyrase subunit A, chloroplastic/mitochondrial [Cucumis sativus]	chr6	21148923	intron3	21149169	intron3	BNv1_06G18734	-	DNA topoisomerase, type IIA, subunit A/C-terminal IPR006691	DNA gyrase subunit A, chloroplastic/mitochondrial [Cucumis sativus]
BN-HDR9615	chr6	19818180	down2kb	19818403	down2kb	CsaV3_6G035810.1	+	Basic-leucine zipper domain IPR025422	transcription factor TGA2-like [Cucumis sativus]	chr6	21176139	down2kb	21176275	down2kb	BNv1_06G18736	+	Basic-leucine zipper domain IPR025422	transcription factor TGA2-like [Cucumis sativus]
BN-HDR9616	chr6	19824351	down2kb	19825640	intron	CsaV3_6G035820.1	+	Alpha/beta hydrolase fold-3	Catalytic [Cucumis sativus]	chr6	21182243	down2kb	21182258	down2kb	BNv1_06G18737	+	Alpha/beta hydrolase fold-3	Catalytic [Cucumis sativus]
BN-HDR9617	chr6	19828168	-	19828330	-	-	-		-	chr6	21184798	down2kb	21184799	down2kb	BNv1_06G18738	-	Zinc finger, RING-type	putative RING-H2 finger protein ATL69 [Cucumis sativus]
BN-HDR9618	chr6	19846446	up2kb	19846786	up2kb	CsaV3_6G035850.1	-	Thioredoxin domain	thioredoxin-like protein CITRX, chloroplastic [Cucumis sativus]	chr6	21202921	up2kb	21203208	up2kb	BNv1_06G18741	-	Thioredoxin domain	thioredoxin-like protein CITRX, chloroplastic [Cucumis sativus]
BN-HDR9618	chr6	19846446	down2kb	19846786	down2kb	CsaV3_6G035860.1	-		protein spotted leaf 11 [Cucumis sativus]	chr6	21202921	down2kb	21203208	down2kb	BNv1_06G18742	-		protein spotted leaf 11 [Cucumis sativus]
BN-HDR9619	chr6	19887539	down2kb	19887859	down2kb	CsaV3_6G035920.1	-	PPC domain	AT-hook motif nuclear-localized protein 10 [Cucumis sativus]	chr6	21244557	down2kb	21245025	down2kb	BNv1_06G18748	-	PPC domain	AT-hook motif nuclear-localized protein 10 [Cucumis sativus]
BN-HDR9624	chr6	20020649	intron1	20021036	intron1	CsaV3_6G036060.1	-	GAF domain IPR003594	phytochrome A-like [Cucumis sativus]	chr6	21377526	up2kb	21377902	up2kb	BNv1_06G18761	-	GAF domain IPR003594	phytochrome A-like [Cucumis sativus]
BN-HDR9627	chr6	20037053	up2kb	20037225	up2kb	CsaV3_6G036080.1	-	Myc-type, basic helix-loop-helix (bHLH) domain	transcription factor bHLH79 [Cucumis sativus]	chr6	21393284	up2kb	21393295	up2kb	BNv1_06G18763	-	Myc-type, basic helix-loop-helix (bHLH) domain	transcription factor bHLH79 [Cucumis sativus]
BN-HDR9627	chr6	20037053	down2kb	20037225	down2kb	CsaV3_6G036090.1	+		-	chr6	21393284	-	21393295	-	-	-		-
BN-HDR9628	chr6	20037973	up2kb	20038343	up2kb	CsaV3_6G036080.1	-	Myc-type, basic helix-loop-helix (bHLH) domain	transcription factor bHLH79 [Cucumis sativus]	chr6	21394045	up2kb	21394408	up2kb	BNv1_06G18763	-	Myc-type, basic helix-loop-helix (bHLH) domain	transcription factor bHLH79 [Cucumis sativus]
BN-HDR9628	chr6	20037973	down2kb	20038343	down2kb	CsaV3_6G036090.1	+		-	chr6	21394045	-	21394408	-	-	-		-
BN-HDR9629	chr6	20063958	intron1	20063958	intron1	CsaV3_6G036130.1	+	Domain of unknown function DUF569	hypothetical protein Csa_6G403600 [Cucumis sativus]	chr6	21420008	intron1	21420076	intron1	BNv1_06G18767	+	Domain of unknown function DUF569	hypothetical protein Csa_6G403600 [Cucumis sativus]
BN-HDR9630	chr6	20072711	down2kb	20072711	down2kb	CsaV3_6G036140.1	+	Zinc finger, HIT-type	zinc finger HIT domain-containing protein 3 isoform X1 [Cucumis sativus]	chr6	21428854	down2kb	21428940	down2kb	BNv1_06G18768	+	Zinc finger, HIT-type	zinc finger HIT domain-containing protein 3 isoform X1 [Cucumis sativus]
BN-HDR9630	chr6	20072711	up2kb	20072711	up2kb	CsaV3_6G036150.1	+	Domain of unknown function DUF1338	hypothetical protein PRUPE_ppa006928mg [Prunus persica]	chr6	21428854	up2kb	21428940	up2kb	BNv1_06G18769	+	Domain of unknown function DUF1338	hypothetical protein PRUPE_ppa006928mg [Prunus persica]
BN-HDR9638	chr6	20182871	down2kb	20183151	down2kb	CsaV3_6G036320.1	+		ethylene-responsive transcription factor WRI1-like [Glycine max]	chr6	21535841	down2kb	21536187	down2kb	BNv1_06G18782	+	AP2/ERF domain	ethylene-responsive transcription factor WRI1-like [Glycine max]
BN-HDR9638	chr6	20182871	up2kb	20183151	up2kb	CsaV3_6G036330.1	+	Cupin 1	germin-like protein subfamily 1 member 1 [Cucumis sativus]	chr6	21535841	up2kb	21536187	up2kb	BNv1_06G18783	+	Cupin 1	germin-like protein subfamily 1 member 1 [Cucumis sativus]
BN-HDR9645	chr6	20273832	up2kb	20274285	up2kb	CsaV3_6G036460.1	-	Alpha-D-phosphohexomutase, alpha/beta/alpha domain I IPR005845	uncharacterized protein LOC101204322 isoform X1 [Cucumis sativus]	chr6	21623768	up2kb	21624189	up2kb	BNv1_06G18796	-	Alpha-D-phosphohexomutase, alpha/beta/alpha domain I IPR005845	uncharacterized protein LOC101204322 isoform X1 [Cucumis sativus]
BN-HDR9645	chr6	20273832	up2kb	20274285	up2kb	CsaV3_6G036470.1	+	Ubiquitin domain	Ubiquitin-like protein [Cucumis sativus]	chr6	21623768	up2kb	21624189	up2kb	BNv1_06G18797	+	Ubiquitin domain	ubiquitin family protein [Arabidopsis lyrata subsp. lyrata]
BN-HDR9646	chr6	20288102	down2kb	20288103	down2kb	CsaV3_6G036490.1	-		-	chr6	21637945	down2kb	21638040	down2kb	BNv1_06G18799	-		-
BN-HDR9648	chr6	20326638	up2kb	20326649	up2kb	CsaV3_6G036530.1	-	Zinc finger, RING-type IPR002035	uncharacterized protein LOC101203839 isoform X1 [Cucumis sativus]	chr6	21677240	-	21677381	-	-	-		-
BN-HDR9650	chr6	20361069	up2kb	20361095	up2kb	CsaV3_6G036580.1	+	JmjC domain IPR003349	hypothetical protein POPTR_0010s23160g [Populus trichocarpa]	chr6	21711767	up2kb	21711831	up2kb	BNv1_06G18808	+	JmjC domain IPR003349	hypothetical protein POPTR_0010s23160g [Populus trichocarpa]
BN-HDR9651	chr6	20380094	up2kb	20380376	intron	CsaV3_6G036590.1	-	ABC transporter-like	ABC transporter G family member 24-like isoform X1 [Cucumis sativus]	chr6	21730861	-	21731149	-	-	-		-
BN-HDR9651	chr6	20380094	up2kb	20380376	up2kb	CsaV3_6G036600.1	+	Protein kinase domain	probable receptor-like protein kinase At5g47070 [Cucumis sativus]	chr6	21730861	-	21731149	-	-	-		-
BN-HDR9652	chr6	20385374	down2kb	20385774	down2kb	CsaV3_6G036600.1	+	Protein kinase domain	probable receptor-like protein kinase At5g47070 [Cucumis sativus]	chr6	21736109	down2kb	21736451	down2kb	BNv1_06G18810	+	Protein kinase domain	probable receptor-like protein kinase At5g47070 [Cucumis sativus]
BN-HDR9653	chr6	20386739	down2kb	20388980	intron	CsaV3_6G036600.1	+	Protein kinase domain	probable receptor-like protein kinase At5g47070 [Cucumis sativus]	chr6	21737402	down2kb	21737589	down2kb	BNv1_06G18810	+	Protein kinase domain	probable receptor-like protein kinase At5g47070 [Cucumis sativus]
BN-HDR9653	chr6	20386739	intron	20388980	down2kb	CsaV3_6G036610.1	-	Amino acid transporter, transmembrane domain	vacuolar amino acid transporter 1-like [Cucumis sativus]	chr6	21737402	-	21737589	down2kb	BNv1_06G18811	-	Amino acid transporter, transmembrane domain	vacuolar amino acid transporter 1-like [Cucumis sativus]
BN-HDR9654	chr6	20389682	down2kb	20389713	down2kb	CsaV3_6G036610.1	-	Amino acid transporter, transmembrane domain	vacuolar amino acid transporter 1-like [Cucumis sativus]	chr6	21738304	down2kb	21738399	down2kb	BNv1_06G18811	-	Amino acid transporter, transmembrane domain	vacuolar amino acid transporter 1-like [Cucumis sativus]
BN-HDR9655	chr6	20390107	down2kb	20390257	down2kb	CsaV3_6G036610.1	-	Amino acid transporter, transmembrane domain	vacuolar amino acid transporter 1-like [Cucumis sativus]	chr6	21738810	down2kb	21738978	down2kb	BNv1_06G18811	-	Amino acid transporter, transmembrane domain	vacuolar amino acid transporter 1-like [Cucumis sativus]
BN-HDR9656	chr6	20396784	intron2	20396784	intron2	CsaV3_6G036610.1	-	Amino acid transporter, transmembrane domain	vacuolar amino acid transporter 1-like [Cucumis sativus]	chr6	21745443	intron1	21745516	intron1	BNv1_06G18811	-	Amino acid transporter, transmembrane domain	vacuolar amino acid transporter 1-like [Cucumis sativus]
BN-HDR9663	chr6	20647348	up2kb	20647538	up2kb	CsaV3_6G036830.1	+	GLTSCR protein, conserved region	unnamed protein product [Vitis vinifera]	chr6	22002239	up2kb	22002362	up2kb	BNv1_06G18831	+	GLTSCR protein, conserved region	unnamed protein product [Vitis vinifera]
BN-HDR9664	chr6	20921967	up2kb	20921971	up2kb	CsaV3_6G037160.1	-	Bifunctional inhibitor/plant lipid transfer protein/seed storage helical domain	hypothetical protein POPTR_0005s23360g [Populus trichocarpa]	chr6	22276414	up2kb	22276552	-	BNv1_06G18863	-	Bifunctional inhibitor/plant lipid transfer protein/seed storage helical domain	hypothetical protein POPTR_0005s23360g [Populus trichocarpa]
BN-HDR9665	chr6	20935313	up2kb	20935553	up2kb	CsaV3_6G037190.1	-		-	chr6	22292640	up2kb	22292748	up2kb	BNv1_06G18866	-		-
BN-HDR9665	chr6	20935313	up2kb	20935553	up2kb	CsaV3_6G037200.1	-		hypothetical protein Csa_6G410620 [Cucumis sativus]	chr6	22292640	up2kb	22292748	up2kb	BNv1_06G18867	-		hypothetical protein Csa_6G410620 [Cucumis sativus]
BN-HDR9665	chr6	20935313	intron	20935553	down2kb	CsaV3_6G037210.1	-		uncharacterized protein LOC101202761 [Cucumis sativus]	chr6	22292640	-	22292748	-	-	-		-
BN-HDR9668	chr6	20943753	up2kb	20943844	up2kb	CsaV3_6G037220.1	+		-	chr6	22301968	up2kb	22302009	up2kb	BNv1_06G18869	+		-
BN-HDR9671	chr6	20960560	down2kb	20960839	down2kb	CsaV3_6G037240.1	-	Ribosome recycling factor domain	ribosome-recycling factor, chloroplastic isoform X1 [Cucumis sativus]	chr6	22318742	-	22318759	-	-	-		-
BN-HDR9673	chr6	20974411	down2kb	20974900	down2kb	CsaV3_6G037260.1	+		outer envelope pore protein 37, chloroplastic [Cucumis sativus]	chr6	22332309	down2kb	22332797	down2kb	BNv1_06G18872	+	Phytocyanin domain	outer envelope pore protein 37, chloroplastic [Cucumis sativus]
BN-HDR9674	chr6	20976964	down2kb	20977076	down2kb	CsaV3_6G037270.1	-		F-box protein At1g10780 [Cucumis sativus]	chr6	22334853	down2kb	22334964	down2kb	BNv1_06G18873	-		F-box protein At1g10780 [Cucumis sativus]
BN-HDR9698	chr6	21169768	up2kb	21170200	up2kb	CsaV3_6G037440.1	-		-	chr6	22528776	up2kb	22529179	up2kb	BNv1_06G18888	-		-
BN-HDR9698	chr6	21169768	down2kb	21170200	down2kb	CsaV3_6G037450.1	-	Ceramidase	uncharacterized protein LOC101206038 isoform X2 [Cucumis sativus]	chr6	22528776	down2kb	22529179	down2kb	BNv1_06G18889	-	Ceramidase	uncharacterized protein LOC101206038 isoform X2 [Cucumis sativus]
BN-HDR9700	chr6	21180525	up2kb	21181026	up2kb	CsaV3_6G037460.1	+	Myc-type, basic helix-loop-helix (bHLH) domain	uncharacterized protein LOC102625584 [Citrus sinensis]	chr6	22540470	up2kb	22540908	up2kb	BNv1_06G18890	+	Myc-type, basic helix-loop-helix (bHLH) domain	uncharacterized protein LOC102625584 [Citrus sinensis]
BN-HDR9704	chr6	21204773	up2kb	21204898	up2kb	CsaV3_6G037480.1	-	Glycine cleavage T-protein-like, N-terminal IPR013977	aminomethyltransferase, mitochondrial [Cucumis sativus]	chr6	22564626	up2kb	22564803	up2kb	BNv1_06G18892	-	Glycine cleavage T-protein-like, N-terminal IPR013977	aminomethyltransferase, mitochondrial [Cucumis sativus]
BN-HDR9704	chr6	21204773	down2kb	21204898	down2kb	CsaV3_6G037490.1	-	F-box domain	F-box protein CPR30-like [Cucumis sativus]	chr6	22564626	down2kb	22564803	down2kb	BNv1_06G18893	-	F-box domain	F-box protein CPR30-like [Cucumis sativus]
BN-HDR9705	chr6	21205960	up2kb	21206058	up2kb	CsaV3_6G037480.1	-	Glycine cleavage T-protein-like, N-terminal IPR013977	aminomethyltransferase, mitochondrial [Cucumis sativus]	chr6	22565854	up2kb	22565855	up2kb	BNv1_06G18892	-	Glycine cleavage T-protein-like, N-terminal IPR013977	aminomethyltransferase, mitochondrial [Cucumis sativus]
BN-HDR9705	chr6	21205960	down2kb	21206058	exon1	CsaV3_6G037490.1	-	F-box domain	F-box protein CPR30-like [Cucumis sativus]	chr6	22565854	down2kb	22565855	down2kb	BNv1_06G18893	-	F-box domain	F-box protein CPR30-like [Cucumis sativus]
BN-HDR9708	chr6	21230775	exon11	21230778	exon11	CsaV3_6G037510.1	+	T-complex 11	hypothetical protein PRUPE_ppa000452mg [Prunus persica]	chr6	22593075	down2kb	22593210	down2kb	BNv1_06G18895	+	T-complex 11	hypothetical protein PRUPE_ppa000452mg [Prunus persica]
BN-HDR9708	chr6	21230775	down2kb	21230778	down2kb	CsaV3_6G037520.1	-	UDP-glucuronosyl/UDP-glucosyltransferase	UDP-glycosyltransferase 74E2-like [Cucumis sativus]	chr6	22593075	down2kb	22593210	down2kb	BNv1_06G18896	-	UDP-glucuronosyl/UDP-glucosyltransferase	UDP-glycosyltransferase 74E2-like [Cucumis sativus]
BN-HDR9715	chr6	21314757	down2kb	21314763	down2kb	CsaV3_6G037650.1	+	Zinc finger, RING-type	RING-H2 finger protein ATL40-like, partial [Cucumis sativus]	chr6	22677168	down2kb	22677256	down2kb	BNv1_06G18907	+	Zinc finger, RING-type	RING-H2 finger protein ATL40-like, partial [Cucumis sativus]
BN-HDR9715	chr6	21314757	down2kb	21314763	down2kb	CsaV3_6G037660.1	-	X8 domain	PLASMODESMATA CALLOSE-BINDING PROTEIN 5 [Cucumis sativus]	chr6	22677168	down2kb	22677256	down2kb	BNv1_06G18908	-	X8 domain	PLASMODESMATA CALLOSE-BINDING PROTEIN 5 [Cucumis sativus]
BN-HDR9715	chr6	21314757	up2kb	21314763	up2kb	CsaV3_6G037640.1	-		-	chr6	22677168	-	22677256	-	-	-		-
BN-HDR9718	chr6	21338642	up2kb	21338788	up2kb	CsaV3_6G037700.1	-		-	chr6	22701393	up2kb	22701540	up2kb	BNv1_06G18912	-		-
BN-HDR9718	chr6	21338642	intron	21338788	down2kb	CsaV3_6G037710.1	-	Rad60/SUMO-like domain	hypothetical protein POPTR_0014s18990g [Populus trichocarpa]	chr6	22701393	-	22701540	down2kb	BNv1_06G18913	-	Rad60/SUMO-like domain	small ubiquitin-related modifier 2 isoform X1 [Amborella trichopoda]
BN-HDR9722	chr6	21353370	intron	21353755	up2kb	CsaV3_6G037730.1	+	AP180 N-terminal homology (ANTH) domain	clathrin coat assembly protein AP180 [Cucumis sativus]	chr6	22715256	-	22715657	-	-	-		-
BN-HDR9723	chr6	21359005	down2kb	21359178	down2kb	CsaV3_6G037730.1	+	AP180 N-terminal homology (ANTH) domain	clathrin coat assembly protein AP180 [Cucumis sativus]	chr6	22720913	down2kb	22721017	down2kb	BNv1_06G18915	+	AP180 N-terminal homology (ANTH) domain	clathrin coat assembly protein AP180 [Cucumis sativus]
BN-HDR9723	chr6	21359005	down2kb	21359178	down2kb	CsaV3_6G037740.1	-		-	chr6	22720913	down2kb	22721017	down2kb	BNv1_06G18916	-		-
BN-HDR9724	chr6	21364756	up2kb	21365100	intron	CsaV3_6G037750.1	-	Armadillo	armadillo repeat-containing protein 3 [Cucumis sativus]	chr6	22726529	up2kb	22726908	-	BNv1_06G18917	-	Armadillo	armadillo repeat-containing protein 3 [Cucumis sativus]
BN-HDR9724	chr6	21364756	intron	21365100	up2kb	CsaV3_6G037760.1	+		hypothetical protein PRUPE_ppa003573mg [Prunus persica]	chr6	22726529	-	22726908	up2kb	BNv1_06G18918	+		hypothetical protein PRUPE_ppa003573mg [Prunus persica]
BN-HDR9728	chr6	21393121	up2kb	21393219	up2kb	CsaV3_6G037790.1	-	Protein-tyrosine phosphatase, SIW14-like	probable tyrosine-protein phosphatase At1g05000 isoform X2 [Cucumis sativus]	chr6	22754677	up2kb	22754809	up2kb	BNv1_06G18921	-	Protein-tyrosine phosphatase, SIW14-like	probable tyrosine-protein phosphatase At1g05000 isoform X2 [Cucumis sativus]
BN-HDR9732	chr6	21440930	intron5	21441018	intron5	CsaV3_6G037860.1	-	Metallo-beta-lactamase	ribonuclease Z, chloroplastic [Cucumis sativus]	chr6	22802363	intron5	22802459	intron5	BNv1_06G18928	-	Metallo-beta-lactamase	ribonuclease Z, chloroplastic [Cucumis sativus]
BN-HDR9734	chr6	21451766	intron	21452071	down2kb	CsaV3_6G037880.1	-	Sugar phosphate transporter domain	probable sugar phosphate/phosphate translocator At1g06470 isoform X1 [Cucumis sativus]	chr6	22813184	-	22813420	down2kb	BNv1_06G18931	-	Sugar phosphate transporter domain	probable sugar phosphate/phosphate translocator At1g06470 isoform X1 [Cucumis sativus]
BN-HDR9734	chr6	21451766	-	21452071	-	-	-		-	chr6	22813184	up2kb	22813420	up2kb	BNv1_06G18930	+		-
BN-HDR9735	chr6	21462243	up2kb	21462397	up2kb	CsaV3_6G037900.1	+	Alpha crystallin/Hsp20 domain	uncharacterized protein LOC101211982 [Cucumis sativus]	chr6	22823638	up2kb	22823654	up2kb	BNv1_06G18932	+	Alpha crystallin/Hsp20 domain	uncharacterized protein LOC101211982 [Cucumis sativus]
BN-HDR9735	chr6	21462243	up2kb	21462397	up2kb	CsaV3_6G037890.1	-		-	chr6	22823638	-	22823654	-	-	-		-
BN-HDR9747	chr6	21680760	up2kb	21680766	up2kb	CsaV3_6G038160.1	+	HAD-like domain	uncharacterized protein LOC101214793 [Cucumis sativus]	chr6	23042103	up2kb	23042180	up2kb	BNv1_06G18958	+	HAD-like domain	uncharacterized protein LOC101214793 [Cucumis sativus]
BN-HDR9748	chr6	21756369	exon2	21756935	down2kb	CsaV3_6G038220.1	+	Phytocyanin domain	mavicyanin [Cucumis sativus]	chr6	23117780	down2kb	23118472	down2kb	BNv1_06G18966	+	Phytocyanin domain	mavicyanin [Cucumis sativus]
BN-HDR9748	chr6	21756369	down2kb	21756935	down2kb	CsaV3_6G038230.1	-		-	chr6	23117780	down2kb	23118472	down2kb	BNv1_06G18967	-		-
BN-HDR9748	chr6	21756369	down2kb	21756935	down2kb	CsaV3_6G038240.1	-	CBS domain IPR001807	hypothetical protein Csa_6G425060 [Cucumis sativus]	chr6	23117780	down2kb	23118472	down2kb	BNv1_06G18968	-	CBS domain IPR001807	hypothetical protein Csa_6G425060 [Cucumis sativus]
BN-HDR9751	chr6	21777044	-	21777082	-	-	-		-	chr6	23138756	up2kb	23138902	up2kb	BNv1_06G18969	-	Cyclin, N-terminal	cyclin-T1-5-like isoform X1 [Cucumis sativus]
BN-HDR9752	chr6	21778951	-	21779355	-	-	-		-	chr6	23140772	down2kb	23141197	down2kb	BNv1_06G18970	-		-
BN-HDR9758	chr6	21861842	-	21862021	-	-	-		-	chr6	23224032	down2kb	23224342	down2kb	BNv1_06G18983	+	The fantastic four family	Uncharacterized protein TCM_041386 [Theobroma cacao]
BN-HDR9758	chr6	21861842	-	21862021	-	-	-		-	chr6	23224032	up2kb	23224342	up2kb	BNv1_06G18984	+		-
BN-HDR9759	chr6	21868724	-	21868838	-	-	-		-	chr6	23231038	down2kb	23231094	down2kb	BNv1_06G18985	+	RNA recognition motif domain	RNA-binding family protein isoform 1 [Theobroma cacao]
BN-HDR9759	chr6	21868724	-	21868838	-	-	-		-	chr6	23231038	down2kb	23231094	down2kb	BNv1_06G18986	-	Transcription factor CBF/NF-Y/archaeal histone domain	DNA polymerase epsilon subunit D isoform X2 [Cucumis sativus]
BN-HDR9760	chr6	21876348	-	21876464	-	-	-		-	chr6	23238600	down2kb	23238700	down2kb	BNv1_06G18987	+		uncharacterized protein LOC101219078 [Cucumis sativus]
BN-HDR9766	chr6	21951901	-	21951901	-	-	-		-	chr6	23314479	up2kb	23314532	up2kb	BNv1_06G19003	-		uncharacterized protein At1g08160 [Cucumis sativus]
BN-HDR9766	chr6	21951901	-	21951901	-	-	-		-	chr6	23314479	down2kb	23314532	down2kb	BNv1_06G19004	-	Protein kinase domain	hypothetical protein PRUPE_ppa021465mg [Prunus persica]
BN-HDR9771	chr6	22033025	-	22033158	-	-	-		-	chr6	23394635	up2kb	23394779	up2kb	BNv1_06G19011	-		uncharacterized protein LOC101221211 [Cucumis sativus]
BN-HDR9772	chr6	22039837	-	22039907	-	-	-		-	chr6	23401429	up2kb	23401513	up2kb	BNv1_06G19012	-	Serine-threonine/tyrosine-protein kinase, catalytic domain	probable receptor-like protein kinase At1g49730 [Cucumis sativus]
BN-HDR9773	chr6	22049288	-	22049469	-	-	-		-	chr6	23410971	down2kb	23411028	down2kb	BNv1_06G19013	+		hypothetical protein Csa_6G426920 [Cucumis sativus]
BN-HDR9774	chr6	22050622	-	22050781	-	-	-		-	chr6	23412192	down2kb	23412619	down2kb	BNv1_06G19013	+		hypothetical protein Csa_6G426920 [Cucumis sativus]
BN-HDR9774	chr6	22050622	-	22050781	-	-	-		-	chr6	23412192	up2kb	23412619	up2kb	BNv1_06G19014	+	Peptidase C19, ubiquitin carboxyl-terminal hydrolase	ubiquitin carboxyl-terminal hydrolase 8 isoform X1 [Cucumis sativus]
BN-HDR9775	chr6	22128069	-	22128144	-	-	-		-	chr6	23489976	intron1	23490035	intron1	BNv1_06G19020	+	Nuclear control of ATP synthase 2	hypothetical protein PRUPE_ppa020652mg, partial [Prunus persica]
BN-HDR9777	chr6	22149852	-	22149924	-	-	-		-	chr6	23515173	intron2	23515173	intron2	BNv1_06G19021	+	Aminotransferase class V domain IPR007230	hypothetical protein PRUPE_ppa000667mg [Prunus persica]
BN-HDR9780	chr6	22171609	-	22172314	-	-	-		-	chr6	23536908	intron3	23537525	intron3	BNv1_06G19025	-	Pectinesterase, catalytic	putative pectinesterase 63 [Cucumis sativus]
BN-HDR9781	chr6	22175457	-	22175648	-	-	-		-	chr6	23540682	intron3	23540855	intron3	BNv1_06G19025	-	Pectinesterase, catalytic	putative pectinesterase 63 [Cucumis sativus]
BN-HDR9782	chr6	22197588	-	22197710	-	-	-		-	chr6	23568808	up2kb	23568886	up2kb	BNv1_06G19030	+	Phytocyanin domain	cucumber peeling cupredoxin-like [Cucumis sativus]
BN-HDR9792	chr6	22464311	-	22464625	-	-	-		-	chr6	23835489	down2kb	23835824	down2kb	BNv1_06G19062	+	EF-hand domain IPR018108	calcium-binding mitochondrial carrier protein SCaMC-1-like isoform X2 [Cucumis sativus]
BN-HDR9792	chr6	22464311	-	22464625	-	-	-		-	chr6	23835489	up2kb	23835824	up2kb	BNv1_06G19063	+	Magnesium chelatase ChlI domain IPR002035	magnesium-chelatase subunit ChlD, chloroplastic [Cucumis sativus]
BN-HDR9793	chr6	22472369	-	22472620	-	-	-		-	chr6	23843563	intron15	23843854	intron15	BNv1_06G19063	+	Magnesium chelatase ChlI domain IPR002035	magnesium-chelatase subunit ChlD, chloroplastic [Cucumis sativus]
BN-HDR9798	chr6	22512362	-	22512655	-	-	-		-	chr6	23883659	down2kb	23883977	down2kb	BNv1_06G19069	-		-
BN-HDR9799	chr6	22523697	-	22523777	-	-	-		-	chr6	23895028	down2kb	23895118	down2kb	BNv1_06G19070	+	Protein RETICULATA-related	uncharacterized protein LOC101209682 [Cucumis sativus]
BN-HDR9799	chr6	22523697	-	22523777	-	-	-		-	chr6	23895028	down2kb	23895118	down2kb	BNv1_06G19071	-	ABC transporter-like IPR013525	ABC transporter G family member 12-like isoform X2 [Cucumis sativus]
BN-HDR9800	chr6	22571722	-	22572342	-	-	-		-	chr6	23931375	up2kb	23931493	up2kb	BNv1_06G19076	-	Glycoside hydrolase, family 28	polygalacturonase [Cucurbita pepo]
BN-HDR9801	chr6	22588873	-	22588975	-	-	-		-	chr6	23947958	up2kb	23947964	up2kb	BNv1_06G19078	-	NAD-dependent epimerase/dehydratase	cinnamoyl-CoA reductase 1-like [Cucumis sativus]
BN-HDR9805	chr6	22673584	-	22673659	-	-	-		-	chr6	24032471	up2kb	24032596	up2kb	BNv1_06G19095	-	Serine-threonine/tyrosine-protein kinase, catalytic domain	serine/threonine-protein kinase-like protein CCR1 [Cucumis sativus]
BN-HDR9806	chr6	22697380	-	22697833	-	-	-		-	chr6	24056347	up2kb	24056883	up2kb	BNv1_06G19099	+	Major intrinsic protein	aquaporin PIP2-1-like [Cucumis sativus]
BN-HDR9809	chr6	22807127	-	22808653	-	-	-		-	chr6	24166080	-	24167500	up2kb	BNv1_06G19113	+	Aromatic amino acid lyase	phenylalanine ammonia-lyase-like [Cucumis sativus]
BN-HDR9811	chr6	22878967	-	22879044	-	-	-		-	chr6	24237817	up2kb	24238021	up2kb	BNv1_06G19124	+		hexose transporter [Vitis vinifera]
BN-HDR9811	chr6	22878967	-	22879044	-	-	-		-	chr6	24237817	up2kb	24238021	up2kb	BNv1_06G19125	+	Major facilitator, sugar transporter-like	hexose transporter [Vitis vinifera]
BN-HDR9817	chr6	22952432	-	22952925	-	-	-		-	chr6	24312255	down2kb	24312781	down2kb	BNv1_06G19136	+	Thioredoxin domain	thioredoxin-like 3-3 [Cucumis sativus]
BN-HDR9817	chr6	22952432	-	22952925	-	-	-		-	chr6	24312255	up2kb	24312781	up2kb	BNv1_06G19137	+	Zinc finger, RING-type	E3 ubiquitin-protein ligase RFWD3 [Cucumis sativus]
BN-HDR9818	chr6	22960266	-	22960668	-	-	-		-	chr6	24320109	down2kb	24320595	down2kb	BNv1_06G19137	+	Zinc finger, RING-type	E3 ubiquitin-protein ligase RFWD3 [Cucumis sativus]
BN-HDR9818	chr6	22960266	-	22960668	-	-	-		-	chr6	24320109	-	24320595	down2kb	BNv1_06G19138	-	S-adenosylmethionine synthetase, N-terminal IPR022629	S-adenosylmethionine synthase 4 [Cucumis sativus]
BN-HDR9819	chr6	22968807	-	22968822	-	-	-		-	chr6	24328767	up2kb	24328880	up2kb	BNv1_06G19139	-	Protein of unknown function DUF4079	uncharacterized protein LOC101222568 [Cucumis sativus]
BN-HDR9821	chr6	22981139	-	22981259	-	-	-		-	chr6	24340622	down2kb	24340836	down2kb	BNv1_06G19141	-	Zinc finger, double-stranded RNA binding	zinc finger protein 593 [Cucumis sativus]
BN-HDR9825	chr6	23031040	-	23031087	-	-	-		-	chr6	24391028	up2kb	24391739	-	BNv1_06G19148	-		-
BN-HDR9831	chr6	23087893	-	23087945	-	-	-		-	chr6	24448191	intron17	24448405	intron17	BNv1_06G19155	-	Amidohydrolase-related IPR008146	protein fluG-like [Cucumis sativus]
BN-HDR9835	chr6	23112818	-	23112878	-	-	-		-	chr6	24474543	intron8	24476288	intron8	BNv1_06G19156	-	Glutamine synthetase, catalytic domain IPR008147	type-1 glutamine synthetase 1-like [Cucumis sativus]
BN-HDR9836	chr6	23118321	-	23118322	-	-	-		-	chr6	24481746	up2kb	24481812	up2kb	BNv1_06G19156	-	Glutamine synthetase, catalytic domain IPR008147	type-1 glutamine synthetase 1-like [Cucumis sativus]
BN-INS9547	chr6	18461686	intron7	18461686	intron7	CsaV3_6G032520.1	+	CobW/HypB/UreG, nucleotide-binding domain IPR011629	hypothetical protein PRUPE_ppa007281mg [Prunus persica]	chr6	19924739	intron6	19924815	intron6	BNv1_06G18617	+	CobW/HypB/UreG, nucleotide-binding domain IPR011629	hypothetical protein PRUPE_ppa007281mg [Prunus persica]
BN-INS9555	chr6	18537401	intron6	18537401	intron6	CsaV3_6G033600.1	+	CobW/HypB/UreG, nucleotide-binding domain IPR011629	hypothetical protein PRUPE_ppa007281mg [Prunus persica]	chr6	19924739	intron6	19924815	intron6	BNv1_06G18617	+	CobW/HypB/UreG, nucleotide-binding domain IPR011629	hypothetical protein PRUPE_ppa007281mg [Prunus persica]
BN-INS9555	chr6	18537401	down2kb	18537401	down2kb	CsaV3_6G033590.1	+		-	chr6	19924739	-	19924815	-	-	-		-
BN-INS9560	chr6	18712518	down2kb	18712519	down2kb	CsaV3_6G033890.1	-	Translin family	translin-associated protein X [Cucumis sativus]	chr6	20095164	down2kb	20095219	down2kb	BNv1_06G18646	-	Translin family	translin-associated protein X [Cucumis sativus]
BN-INS9570	chr6	18803656	down2kb	18803657	down2kb	CsaV3_6G033990.1	+		tetratricopeptide repeat protein 33 [Cucumis sativus]	chr6	20186744	down2kb	20187195	-	BNv1_06G18658	+		tetratricopeptide repeat protein 33 [Cucumis sativus]
BN-INS9570	chr6	18803656	up2kb	18803657	up2kb	CsaV3_6G034000.1	+	Chalcone/stilbene synthase, N-terminal	chalcone synthase [Persicaria hydropiper]	chr6	20186744	up2kb	20187195	up2kb	BNv1_06G18659	+	Chalcone/stilbene synthase, N-terminal	chalcone synthase [Persicaria hydropiper]
BN-INS9608	chr6	19761598	intron5	19761602	intron5	CsaV3_6G035780.1	+	EAP30 IPR021648	vacuolar protein sorting-associated protein 36 [Cucumis sativus]	chr6	21120805	-	21120978	-	-	-		-
BN-INS9625	chr6	20027181	down2kb	20027181	down2kb	CsaV3_6G036070.1	-	Glutathione-dependent formaldehyde-activating enzyme/centromere protein V	hypothetical protein Csa_6G403060 [Cucumis sativus]	chr6	21383212	down2kb	21383283	down2kb	BNv1_06G18762	-	Glutathione-dependent formaldehyde-activating enzyme/centromere protein V	hypothetical protein Csa_6G403060 [Cucumis sativus]
BN-INS9643	chr6	20245061	intron2	20245062	intron2	CsaV3_6G036400.1	-	Major intrinsic protein	aquaporin PIP2-1-like [Glycine max]	chr6	21594909	intron2	21594966	intron2	BNv1_06G18791	-	Major intrinsic protein	aquaporin PIP2-1-like [Glycine max]
BN-INS9643	chr6	20245061	down2kb	20245062	down2kb	CsaV3_6G036410.1	-		-	chr6	21594909	down2kb	21594966	down2kb	BNv1_06G18792	-		-
BN-INS9643	chr6	20245061	up2kb	20245062	up2kb	CsaV3_6G036420.1	+	Glycoside hydrolase, family 5	mannan endo-1,4-beta-mannosidase 6 [Cucumis sativus]	chr6	21594909	-	21594966	-	-	-		-
BN-INS9666	chr6	20941959	up2kb	20941959	up2kb	CsaV3_6G037210.1	-		uncharacterized protein LOC101202761 [Cucumis sativus]	chr6	22299185	-	22299244	-	-	-		-
BN-INS9675	chr6	20982653	up2kb	20982654	up2kb	CsaV3_6G037270.1	-		F-box protein At1g10780 [Cucumis sativus]	chr6	22340528	-	22340925	-	-	-		-
BN-INS9702	chr6	21193714	intron9	21193718	intron9	CsaV3_6G037480.1	-	Glycine cleavage T-protein-like, N-terminal IPR013977	aminomethyltransferase, mitochondrial [Cucumis sativus]	chr6	22553560	intron9	22553631	intron9	BNv1_06G18892	-	Glycine cleavage T-protein-like, N-terminal IPR013977	aminomethyltransferase, mitochondrial [Cucumis sativus]
BN-INS9706	chr6	21216043	up2kb	21216045	up2kb	CsaV3_6G037500.1	-	F-box domain IPR006527	F-box protein CPR30-like [Cucumis sativus]	chr6	22575832	up2kb	22578288	-	BNv1_06G18894	-	F-box domain IPR006527	F-box protein CPR30-like [Cucumis sativus]
BN-INS9725	chr6	21366631	up2kb	21366632	up2kb	CsaV3_6G037760.1	+		hypothetical protein PRUPE_ppa003573mg [Prunus persica]	chr6	22728463	up2kb	22728583	up2kb	BNv1_06G18918	+		hypothetical protein PRUPE_ppa003573mg [Prunus persica]
BN-INS9745	chr6	21650491	up2kb	21650491	up2kb	CsaV3_6G038120.1	-	Uncharacterised protein family, basic secretory protein	hypothetical protein PRUPE_ppa024311mg [Prunus persica]	chr6	23011366	up2kb	23011795	up2kb	BNv1_06G18954	-	Uncharacterised protein family, basic secretory protein	hypothetical protein PRUPE_ppa024311mg [Prunus persica]
BN-INS9794	chr6	22477004	-	22477005	-	-	-		-	chr6	23848238	down2kb	23848318	down2kb	BNv1_06G19063	+	Magnesium chelatase ChlI domain IPR002035	magnesium-chelatase subunit ChlD, chloroplastic [Cucumis sativus]
BN-INS9794	chr6	22477004	-	22477005	-	-	-		-	chr6	23848238	up2kb	23848318	up2kb	BNv1_06G19064	+	Ubiquitin-conjugating enzyme E2	ubiquitin-conjugating enzyme E2 20-like [Cucumis sativus]
BN-INS9810	chr6	22831004	-	22831005	-	-	-		-	chr6	24189797	up2kb	24189881	up2kb	BNv1_06G19116	-	Aromatic amino acid lyase	phenylalanine ammonia-lyase-like [Cucumis sativus]
BN-INS9810	chr6	22831004	-	22831005	-	-	-		-	chr6	24189797	down2kb	24189881	down2kb	BNv1_06G19117	-	Aromatic amino acid lyase	phenylalanine ammonia-lyase-like [Cucumis sativus]
BN-INV1808	chr6	21232483	exon2	21260567	intron	CsaV3_6G037520.1	-	UDP-glucuronosyl/UDP-glucosyltransferase	UDP-glycosyltransferase 74E2-like [Cucumis sativus]	chr6	22594893	-	22623050	down2kb	BNv1_06G18900	+	UDP-glucuronosyl/UDP-glucosyltransferase	UDP-glycosyltransferase 74E2-like [Cucumis sativus]
BN-INV1808	chr6	21232483	exon2	21260567	intron	CsaV3_6G037520.1	-	UDP-glucuronosyl/UDP-glucosyltransferase	UDP-glycosyltransferase 74E2-like [Cucumis sativus]	chr6	22594893	-	22623050	-	BNv1_06G18899	+	UDP-glucuronosyl/UDP-glucosyltransferase	UDP-glycosyltransferase 74E2-like [Cucumis sativus]
BN-INV1808	chr6	21232483	exon2	21260567	intron	CsaV3_6G037520.1	-	UDP-glucuronosyl/UDP-glucosyltransferase	UDP-glycosyltransferase 74E2-like [Cucumis sativus]	chr6	22594893	down2kb	22623050	-	BNv1_06G18896	-	UDP-glucuronosyl/UDP-glucosyltransferase	UDP-glycosyltransferase 74E2-like [Cucumis sativus]
BN-INV1808	chr6	21232483	intron	21260567	intron	CsaV3_6G037530.1	+	EF-hand domain	uncharacterized protein LOC105435869 [Cucumis sativus]	chr6	22594893	-	22623050	-	BNv1_06G18898	-	EF-hand domain	uncharacterized protein LOC105435869 [Cucumis sativus]
BN-INV1808	chr6	21232483	intron	21260567	intron	CsaV3_6G037540.1	-	TATA box binding protein associated factor (TAF) IPR011442	hypothetical protein PRUPE_ppa003876mg [Prunus persica]	chr6	22594893	-	22623050	-	BNv1_06G18897	+	TATA box binding protein associated factor (TAF) IPR011442	hypothetical protein PRUPE_ppa003876mg [Prunus persica]
BN-INV1808	chr6	21232483	intron	21260567	intron	CsaV3_6G037550.1	-		-	chr6	22594893	-	22623050	-	BNv1_06G18897	+	TATA box binding protein associated factor (TAF) IPR011442	hypothetical protein PRUPE_ppa003876mg [Prunus persica]
BN-INV1808	chr6	21232483	intron	21260567	exon2	CsaV3_6G037560.1	+	UDP-glucuronosyl/UDP-glucosyltransferase	UDP-glycosyltransferase 74E2-like [Cucumis sativus]	chr6	22594893	down2kb	22623050	-	BNv1_06G18896	-	UDP-glucuronosyl/UDP-glucosyltransferase	UDP-glycosyltransferase 74E2-like [Cucumis sativus]
BN-INV1808	chr6	21232483	intron	21260567	exon2	CsaV3_6G037560.1	+	UDP-glucuronosyl/UDP-glucosyltransferase	UDP-glycosyltransferase 74E2-like [Cucumis sativus]	chr6	22594893	-	22623050	down2kb	BNv1_06G18900	+	UDP-glucuronosyl/UDP-glucosyltransferase	UDP-glycosyltransferase 74E2-like [Cucumis sativus]
BN-INV1808	chr6	21232483	intron	21260567	exon2	CsaV3_6G037560.1	+	UDP-glucuronosyl/UDP-glucosyltransferase	UDP-glycosyltransferase 74E2-like [Cucumis sativus]	chr6	22594893	-	22623050	-	BNv1_06G18899	+	UDP-glucuronosyl/UDP-glucosyltransferase	UDP-glycosyltransferase 74E2-like [Cucumis sativus]
BN-INV1808	chr6	21232483	intron	21260567	down2kb	CsaV3_6G037570.1	-	PMR5 N-terminal domain IPR026057	protein trichome birefringence-like 42 [Cucumis sativus]	chr6	22594893	-	22623050	down2kb	BNv1_06G18901	-	PMR5 N-terminal domain IPR026057	protein trichome birefringence-like 42 [Cucumis sativus]
BN-INV1808	chr6	21232483	down2kb	21260567	intron	CsaV3_6G037510.1	+	T-complex 11	hypothetical protein PRUPE_ppa000452mg [Prunus persica]	chr6	22594893	-	22623050	-	-	-		-
BN-INV1809	chr6	22546413	-	22551045	-	-	-		-	chr6	23917739	intron1	23922381	-	BNv1_06G19073	+	Phosphatidylinositol N-acetylglucosaminyltransferase subunit Y	hypothetical protein [Cucumis melo subsp. melo]
BN-INV1809	chr6	22546413	-	22551045	-	-	-		-	chr6	23917739	-	23922381	down2kb	BNv1_06G19074	+	Glycoside hydrolase, family 28	exopolygalacturonase-like [Cucumis sativus]
BN-INV1809	chr6	22546413	-	22551045	-	-	-		-	chr6	23917739	-	23922381	down2kb	BNv1_06G19075	-	Protein arginine methyltransferase NDUFAF7	MidA-like protein [Medicago truncatula]
BN-INVDP4754	chr6	13891649	-	13894006	-	-	-		-	chr6	19330848	-	19333208	up2kb	BNv1_06G18541	+	Ulp1 protease family, C-terminal catalytic domain IPR025312	hypothetical protein VITISV_003642 [Vitis vinifera]
BN-INVDP4760	chr6	17846888	down2kb	17848812	intron	CsaV3_6G031720.1	+	Dehydrin	phosphoprotein ECPP44 [Cucumis sativus]	chr6	14263566	-	14265482	-	-	-		-
BN-INVDP4761	chr6	17996023	intron9	17996331	intron9	CsaV3_6G031860.1	-	Ribonuclease III domain IPR001650	endoribonuclease Dicer homolog 3-like isoform X2 [Citrus sinensis]	chr6	15102759	-	15103072	-	-	-		-
BN-INVDP4762	chr6	18418969	intron1	18419313	intron1	CsaV3_6G032480.1	-	WRKY domain	hypothetical protein PRUPE_ppa008480mg [Prunus persica]	chr6	18603759	-	18604101	-	-	-		-
BN-INVDP4763	chr6	18432310	intron1	18432761	intron1	CsaV3_6G032480.1	-	WRKY domain	hypothetical protein PRUPE_ppa008480mg [Prunus persica]	chr6	20846828	-	20847277	-	-	-		-
BN-INVDP4765	chr6	19570440	intron11	19570950	intron11	CsaV3_6G035590.1	-	Exonuclease, RNase T/DNA polymerase III	small RNA degrading nuclease 5 [Cucumis sativus]	chr6	4418446	-	4418953	-	-	-		-
BN-INVDP4766	chr6	19576693	intron11	19579078	intron11	CsaV3_6G035590.1	-	Exonuclease, RNase T/DNA polymerase III	small RNA degrading nuclease 5 [Cucumis sativus]	chr6	15853670	-	15856035	-	-	-		-
BN-INVDP4766	chr6	19576693	-	19579078	-	-	-		-	chr6	15853670	intron6	15856035	intron6	BNv1_06G18347	+	Ulp1 protease family, C-terminal catalytic domain	ubiquitin-like-specific protease ESD4 [Cucumis sativus]
BN-INVDP4767	chr6	22549044	-	22562732	-	-	-		-	chr6	23917714	intron1	23931374	-	BNv1_06G19073	+	Phosphatidylinositol N-acetylglucosaminyltransferase subunit Y	hypothetical protein [Cucumis melo subsp. melo]
BN-INVDP4767	chr6	22549044	-	22562732	-	-	-		-	chr6	23917714	-	23931374	-	BNv1_06G19074	+	Glycoside hydrolase, family 28	exopolygalacturonase-like [Cucumis sativus]
BN-INVDP4767	chr6	22549044	-	22562732	-	-	-		-	chr6	23917714	-	23931374	-	BNv1_06G19075	-	Protein arginine methyltransferase NDUFAF7	MidA-like protein [Medicago truncatula]
BN-INVDP4767	chr6	22549044	-	22562732	-	-	-		-	chr6	23917714	-	23931374	up2kb	BNv1_06G19076	-	Glycoside hydrolase, family 28	polygalacturonase [Cucurbita pepo]
BN-INVDP4980	chr1	11009624	-	11009902	-	-	-		-	chr6	22377521	intron2	22377799	intron2	BNv1_06G18878	-	Ankyrin repeat-containing domain IPR026961	ankyrin repeat-containing protein At5g02620-like [Cucumis sativus]
BN-INVDP5504	chr1	16293924	-	16294688	-	-	-		-	chr6	21022007	up2kb	21022768	up2kb	BNv1_06G18723	+	Protein of unknown function DUF4750	Uncharacterized protein isoform 1 [Theobroma cacao]
BN-INVDP5993	chr2	13559593	-	13560102	-	-	-		-	chr6	20934021	intron11	20934530	intron11	BNv1_06G18717	-	Exonuclease, RNase T/DNA polymerase III	small RNA degrading nuclease 5 [Cucumis sativus]
BN-INVDP6428	chr2	24554478	-	24557908	-	-	-		-	chr6	23502185	intron12	23505589	intron12	BNv1_06G19020	+	Nuclear control of ATP synthase 2	hypothetical protein PRUPE_ppa020652mg, partial [Prunus persica]
BN-INVDP7422	chr4	14943489	-	14948683	-	-	-		-	chr6	19241322	down2kb	19246505	-	BNv1_06G18525	+		BTB/POZ domain with WD40/YVTN repeat-containing protein [Arabidopsis thaliana]
BN-INVDP7422	chr4	14943489	-	14948683	-	-	-		-	chr6	19241322	-	19246505	down2kb	BNv1_06G18526	-		-
BN-INVDP7647	chr5	7425416	-	7430720	-	-	-		-	chr6	20425534	intron2	20431287	intron2	BNv1_06G18676	-	Zinc finger, CCCH-type	zinc finger CCCH domain-containing protein 1 [Cucumis sativus]
BN-INVDP8236	chr5	18045826	-	18051241	-	-	-		-	chr6	23546910	up2kb	23552323	-	BNv1_06G19025	-	Pectinesterase, catalytic	putative pectinesterase 63 [Cucumis sativus]
BN-INVDP8236	chr5	18045826	-	18051241	-	-	-		-	chr6	23546910	exon1	23552323	-	BNv1_06G19026	+	Probable transposase, Ptta/En/Spm, plant IPR025312	hypothetical protein VITISV_019902 [Vitis vinifera]
BN-INVDP8275	chr5	20484117	-	20484495	-	-	-		-	chr6	19329261	down2kb	19329639	down2kb	BNv1_06G18540	+	Dehydrin	phosphoprotein ECPP44 [Cucumis sativus]
BN-INVDP8949	chr6	18038866	intron17	18039179	intron17	CsaV3_6G031920.1	-	IQ motif, EF-hand binding site IPR001609	myosin-15 isoform X1 [Cucumis sativus]	chr3	27547352	-	27547664	-	-	-		-
BN-INVDP8954	chr6	18236685	down2kb	18237164	down2kb	CsaV3_6G032200.1	+		hypothetical protein MTR_3g104620 [Medicago truncatula]	chr2	17824007	-	17824478	-	-	-		-
BN-INVDP8955	chr6	18236685	down2kb	18237204	down2kb	CsaV3_6G032200.1	+		hypothetical protein MTR_3g104620 [Medicago truncatula]	chr7	8104358	-	8104872	-	-	-		-
BN-INVDP8959	chr6	18252776	intron	18253428	down2kb	CsaV3_6G032220.1	-		enhancer of yellow 2 transcription factor homolog [Setaria italica]	chr4	9904949	-	9905601	-	-	-		-
BN-INVDP8960	chr6	18310205	intron7	18311403	intron7	CsaV3_6G032330.1	-	Proteasome, subunit alpha/beta IPR009653	proteasome subunit beta type-5 [Cucumis sativus]	chr4	28744474	-	28745663	-	-	-		-
BN-INVDP8962	chr6	18419211	intron1	18419531	intron1	CsaV3_6G032480.1	-	WRKY domain	hypothetical protein PRUPE_ppa008480mg [Prunus persica]	chr1	10676384	-	10676704	-	-	-		-
BN-INVDP8962	chr6	18419211	-	18419531	-	-	-		-	chr1	10676384	up2kb	10676704	up2kb	BNv1_01G01726	+	The fantastic four family	protein FAF-like, chloroplastic [Cucumis sativus]
BN-INVDP8963	chr6	18419743	intron1	18420197	intron1	CsaV3_6G032480.1	-	WRKY domain	hypothetical protein PRUPE_ppa008480mg [Prunus persica]	chr2	6272362	-	6272812	-	-	-		-
BN-INVDP8965	chr6	18423973	intron1	18431881	intron1	CsaV3_6G032480.1	-	WRKY domain	hypothetical protein PRUPE_ppa008480mg [Prunus persica]	chr1	10599812	-	10607703	-	-	-		-
BN-INVDP8965	chr6	18423973	-	18431881	-	-	-		-	chr1	10599812	down2kb	10607703	-	BNv1_01G01720	+	NAC domain	NAC domain-containing protein 90-like [Cucumis sativus]
BN-INVDP8966	chr6	18431537	intron1	18432048	intron1	CsaV3_6G032480.1	-	WRKY domain	hypothetical protein PRUPE_ppa008480mg [Prunus persica]	chr4	20247385	-	20247894	-	-	-		-
BN-INVDP8967	chr6	18432000	intron1	18432312	intron1	CsaV3_6G032480.1	-	WRKY domain	hypothetical protein PRUPE_ppa008480mg [Prunus persica]	chr2	23262225	-	23262538	-	-	-		-
BN-INVDP8968	chr6	18483490	intron9	18488334	intron9	CsaV3_6G032560.1	+	Alpha/beta hydrolase fold-1	monoacylglycerol lipase ABHD6 [Cucumis sativus]	chr1	19246853	-	19251652	-	-	-		-
BN-INVDP8968	chr6	18483490	-	18488334	-	-	-		-	chr1	19246853	intron13	19251652	intron13	BNv1_01G02184	-	Anaphase-promoting complex subunit 4 long domain IPR024977	hypothetical protein PRUPE_ppa001703mg [Prunus persica]
BN-INVDP8972	chr6	18559218	intron9	18563854	intron9	CsaV3_6G033640.1	+	Alpha/beta hydrolase fold-1	monoacylglycerol lipase ABHD6 [Cucumis sativus]	chr4	32593398	-	32597962	-	-	-		-
BN-INVDP8973	chr6	18563809	intron9	18564049	intron9	CsaV3_6G033640.1	+	Alpha/beta hydrolase fold-1	monoacylglycerol lipase ABHD6 [Cucumis sativus]	chr2	20928276	-	20928516	-	-	-		-
BN-INVDP8973	chr6	18563809	-	18564049	-	-	-		-	chr2	20928276	down2kb	20928516	down2kb	BNv1_02G05306	+	HAT (Half-A-TPR) repeat	Crooked neck protein / cell cycle protein, putative isoform 1 [Theobroma cacao]
BN-INVDP8996	chr6	19597850	up2kb	19598094	up2kb	CsaV3_6G035600.1	+	Ribosome maturation protein SBDS, C-terminal IPR019783	ribosome maturation protein SBDS [Cucumis sativus]	chr5	15900920	-	15901164	-	-	-		-
BN-INVDP8996	chr6	19597850	-	19598094	-	-	-		-	chr5	15900920	exon4	15901164	intron2	BNv1_05G14849	-	Photosystem I PsaA/PsaB	Photosystem I P700 chlorophyll a apoprotein [Medicago truncatula]
BN-INVDP8998	chr6	19756622	intron2	19757001	intron2	CsaV3_6G035780.1	+	EAP30 IPR021648	vacuolar protein sorting-associated protein 36 [Cucumis sativus]	chr2	21386696	-	21387076	-	-	-		-
BN-INVDP8998	chr6	19756622	-	19757001	-	-	-		-	chr2	21386696	intron2	21387076	intron2	BNv1_02G05329	+	Pentatricopeptide repeat	Pentatricopeptide repeat-containing protein, putative [Theobroma cacao]
BN-INVDP8999	chr6	19769528	intron23	19769864	intron23	CsaV3_6G035790.1	-	DNA topoisomerase, type IIA, subunit A/C-terminal IPR006691	DNA gyrase subunit A, chloroplastic/mitochondrial [Cucumis sativus]	chr2	21388282	-	21388618	-	-	-		-
BN-INVDP8999	chr6	19769528	-	19769864	-	-	-		-	chr2	21388282	intron2	21388618	intron2	BNv1_02G05329	+	Pentatricopeptide repeat	Pentatricopeptide repeat-containing protein, putative [Theobroma cacao]
BN-INVDP9000	chr6	19769709	intron23	19770367	intron23	CsaV3_6G035790.1	-	DNA topoisomerase, type IIA, subunit A/C-terminal IPR006691	DNA gyrase subunit A, chloroplastic/mitochondrial [Cucumis sativus]	chr5	13389901	-	13390559	-	-	-		-
BN-INVDP9000	chr6	19769709	-	19770367	-	-	-		-	chr5	13389901	intron6	13390559	intron6	BNv1_05G14734	+	C2 domain IPR002921	Triglyceride lipases,triglyceride lipases isoform 1 [Theobroma cacao]
BN-INVDP9003	chr6	20172468	down2kb	20173895	intron	CsaV3_6G036290.1	+	Whirly transcription factor	hypothetical protein CICLE_v10032427mg [Citrus clementina]	chr5	13628346	-	13629780	-	-	-		-
BN-INVDP9003	chr6	20172468	up2kb	20173895	intron	CsaV3_6G036300.1	-	Formin, FH2 domain	formin-like protein 4 [Cucumis sativus]	chr5	13628346	-	13629780	-	-	-		-
BN-INVDP9006	chr6	20513957	intron1	20514518	intron1	CsaV3_6G036730.1	-	BLOC-1-related complex subunit 8	uncharacterized protein LOC101218921 [Cucumis sativus]	chr5	29101050	-	29101611	-	-	-		-
BN-INVDP9006	chr6	20513957	-	20514518	-	-	-		-	chr5	29101050	intron3	29101611	intron3	BNv1_05G15416	+	Survival motor neuron	survival of motor neuron-related-splicing factor 30 isoform X1 [Cucumis sativus]
BN-INVDP9007	chr6	20514079	intron1	20514516	intron1	CsaV3_6G036730.1	-	BLOC-1-related complex subunit 8	uncharacterized protein LOC101218921 [Cucumis sativus]	chr1	20281971	-	20282408	-	-	-		-
BN-INVDP9007	chr6	20514079	-	20514516	-	-	-		-	chr1	20281971	intron15	20282408	intron15	BNv1_01G02278	+	Digestive organ expansion factor, predicted	hypothetical protein CICLE_v10030781mg [Citrus clementina]
BN-INVDP9010	chr6	20695029	intron7	20696012	intron7	CsaV3_6G036860.1	+		Reduced epidermal fluorescence 4, putative isoform 1 [Theobroma cacao]	chr4	23003425	-	23004408	-	-	-		-
BN-INVDP9010	chr6	20695029	-	20696012	-	-	-		-	chr4	23003425	intron3	23004408	intron3	BNv1_04G12774	-	Translation elongation factor EFG, V domain IPR004161	Precursor [Vitis vinifera]
BN-INVDP9014	chr6	20782287	up2kb	20782884	up2kb	CsaV3_6G037000.1	-	NDUFAF3/Mth938 domain-containing protein	hypothetical protein CICLE_v10022551mg [Citrus clementina]	chr5	9753638	intron1	9754214	up2kb	BNv1_05G14567	-		hypothetical protein PRUPE_ppa012479mg [Prunus persica]
BN-INVDP9637	chr7	8529796	-	8530696	-	-	-		-	chr6	24468831	intron8	24469722	intron8	BNv1_06G19156	-	Glutamine synthetase, catalytic domain IPR008147	type-1 glutamine synthetase 1-like [Cucumis sativus]
BN-INVDP9717	chr7	9235650	-	9236303	-	-	-		-	chr6	20590654	-	20591307	up2kb	BNv1_06G18689	+	Haem peroxidase, plant/fungal/bacterial	probable L-ascorbate peroxidase 6, chloroplastic isoform X1 [Cucumis sativus]
BN-INVTR2308	chr6	12229616	-	12229989	-	-	-		-	chr6	20430917	intron2	20431290	intron2	BNv1_06G18676	-	Zinc finger, CCCH-type	zinc finger CCCH domain-containing protein 1 [Cucumis sativus]
BN-INVTR2318	chr6	18310278	intron7	18310614	intron7	CsaV3_6G032330.1	-	Proteasome, subunit alpha/beta IPR009653	proteasome subunit beta type-5 [Cucumis sativus]	chr6	24469392	-	24469725	-	-	-		-
BN-INVTR2318	chr6	18310278	-	18310614	-	-	-		-	chr6	24469392	intron8	24469725	intron8	BNv1_06G19156	-	Glutamine synthetase, catalytic domain IPR008147	type-1 glutamine synthetase 1-like [Cucumis sativus]
BN-INVTR2320	chr6	19755247	intron2	19756248	intron2	CsaV3_6G035780.1	+	EAP30 IPR021648	vacuolar protein sorting-associated protein 36 [Cucumis sativus]	chr6	12177150	-	12178147	-	-	-		-
BN-INVTR9811	chr7	16324972	-	16325946	-	-	-		-	chr6	21304388	up2kb	21305362	up2kb	BNv1_06G18753	-	SET domain	uncharacterized protein LOC102611958 isoform X1 [Citrus sinensis]
BN-INVTR9811	chr7	16324972	-	16325946	-	-	-		-	chr6	21304388	up2kb	21305362	up2kb	BNv1_06G18754	+		-
BN-NOTAL3238	-	-	-	-	-	-	-		-	chr6	19943784	intron1	19944235	intron1	BNv1_06G18622	-	Band 7 domain	hypothetical protein POPTR_0010s16620g [Populus trichocarpa]
BN-NOTAL3238	-	-	-	-	-	-	-		-	chr6	19943784	up2kb	19944235	up2kb	BNv1_06G18623	+	Alpha/beta hydrolase fold-1	monoacylglycerol lipase ABHD6 [Cucumis sativus]
BN-NOTAL3245	-	-	-	-	-	-	-		-	chr6	21565542	up2kb	21566251	up2kb	BNv1_06G18786	+	Reverse transcriptase domain	reverse transcriptase [Cucumis melo subsp. melo]
BN-NOTAL3246	-	-	-	-	-	-	-		-	chr6	21568569	down2kb	21568897	down2kb	BNv1_06G18786	+	Reverse transcriptase domain	reverse transcriptase [Cucumis melo subsp. melo]
BN-NOTAL3246	-	-	-	-	-	-	-		-	chr6	21568569	-	21568897	up2kb	BNv1_06G18787	+	Chorismate synthase	chorismate synthase, chloroplastic [Cucumis sativus]
BN-NOTAL3248	-	-	-	-	-	-	-		-	chr6	22280049	down2kb	22283210	-	BNv1_06G18864	+	Bifunctional inhibitor/plant lipid transfer protein/seed storage helical domain	Bifunctional inhibitor/lipid-transfer protein/seed storage 2S albumin superfamily protein [Theobroma cacao]
BN-NOTAL3251	-	-	-	-	-	-	-		-	chr6	24468459	intron8	24468830	intron8	BNv1_06G19156	-	Glutamine synthetase, catalytic domain IPR008147	type-1 glutamine synthetase 1-like [Cucumis sativus]
BN-NOTAL3252	-	-	-	-	-	-	-		-	chr6	24469726	intron8	24470581	intron8	BNv1_06G19156	-	Glutamine synthetase, catalytic domain IPR008147	type-1 glutamine synthetase 1-like [Cucumis sativus]
BN-NOTAL892	chr6	17888411	intron9	17888946	intron9	CsaV3_6G031760.1	-	Alcohol dehydrogenase, C-terminal IPR013154	alcohol dehydrogenase-like 7 [Cucumis sativus]	-	-	-	-	-	-	-		-
BN-NOTAL893	chr6	18310066	intron7	18310204	intron7	CsaV3_6G032330.1	-	Proteasome, subunit alpha/beta IPR009653	proteasome subunit beta type-5 [Cucumis sativus]	-	-	-	-	-	-	-		-
BN-NOTAL895	chr6	18419532	intron1	18419742	intron1	CsaV3_6G032480.1	-	WRKY domain	hypothetical protein PRUPE_ppa008480mg [Prunus persica]	-	-	-	-	-	-	-		-
BN-NOTAL896	chr6	18421961	intron1	18422463	intron1	CsaV3_6G032480.1	-	WRKY domain	hypothetical protein PRUPE_ppa008480mg [Prunus persica]	-	-	-	-	-	-	-		-
BN-NOTAL897	chr6	18423189	intron1	18423972	intron1	CsaV3_6G032480.1	-	WRKY domain	hypothetical protein PRUPE_ppa008480mg [Prunus persica]	-	-	-	-	-	-	-		-
BN-NOTAL898	chr6	18442747	down2kb	18443811	down2kb	CsaV3_6G032490.1	-	UDP-glucose/GDP-mannose dehydrogenase, dimerisation IPR014027	UDP-glucose 6-dehydrogenase 1 [Cucumis sativus]	-	-	-	-	-	-	-		-
BN-NOTAL898	chr6	18442747	intron	18443811	down2kb	CsaV3_6G032500.1	-	UDP-glucose/GDP-mannose dehydrogenase, N-terminal	UDP-glucose 6-dehydrogenase 1 [Cucumis sativus]	-	-	-	-	-	-	-		-
BN-NOTAL899	chr6	18457690	up2kb	18457878	up2kb	CsaV3_6G032520.1	+	CobW/HypB/UreG, nucleotide-binding domain IPR011629	hypothetical protein PRUPE_ppa007281mg [Prunus persica]	-	-	-	-	-	-	-		-
BN-NOTAL901	chr6	18495468	up2kb	18495967	up2kb	CsaV3_6G032570.1	-	X8 domain	PLASMODESMATA CALLOSE-BINDING PROTEIN 3 [Cucumis sativus]	-	-	-	-	-	-	-		-
BN-NOTAL910	chr6	20022102	up2kb	20023524	intron	CsaV3_6G036060.1	-	GAF domain IPR003594	phytochrome A-like [Cucumis sativus]	-	-	-	-	-	-	-		-
BN-NOTAL914	chr6	20925484	down2kb	20925555	down2kb	CsaV3_6G037170.1	+	Bifunctional inhibitor/plant lipid transfer protein/seed storage helical domain	Bifunctional inhibitor/lipid-transfer protein/seed storage 2S albumin superfamily protein [Theobroma cacao]	-	-	-	-	-	-	-		-
BN-NOTAL915	chr6	20925870	down2kb	20925920	down2kb	CsaV3_6G037170.1	+	Bifunctional inhibitor/plant lipid transfer protein/seed storage helical domain	Bifunctional inhibitor/lipid-transfer protein/seed storage 2S albumin superfamily protein [Theobroma cacao]	-	-	-	-	-	-	-		-
BN-NOTAL916	chr6	21375033	down2kb	21375164	down2kb	CsaV3_6G037760.1	+		hypothetical protein PRUPE_ppa003573mg [Prunus persica]	-	-	-	-	-	-	-		-
BN-NOTAL916	chr6	21375033	up2kb	21375164	up2kb	CsaV3_6G037770.1	+		hypothetical protein Csa_6G421620 [Cucumis sativus]	-	-	-	-	-	-	-		-
BN-TDM9518	chr6	17878019	intron3	17878107	intron3	CsaV3_6G031750.1	-	Alcohol dehydrogenase, C-terminal IPR013154	alcohol dehydrogenase-like 7 [Cucumis sativus]	chr6	19361102	intron3	19361150	intron3	BNv1_06G18545	-	Alcohol dehydrogenase, C-terminal IPR013154	alcohol dehydrogenase-like 7 [Cucumis sativus]
BN-TDM9523	chr6	17969998	intron10	17970077	intron10	CsaV3_6G031840.1	+	3-beta hydroxysteroid dehydrogenase/isomerase IPR003388	3beta-hydroxysteroid-dehydrogenase/decarboxylase isoform 1 [Theobroma cacao]	chr6	19454312	intron10	19454361	intron10	BNv1_06G18555	+	3-beta hydroxysteroid dehydrogenase/isomerase IPR003388	3beta-hydroxysteroid-dehydrogenase/decarboxylase isoform 1 [Theobroma cacao]
BN-TDM9529	chr6	18061873	down2kb	18061915	down2kb	CsaV3_6G031930.1	+	CCB3/YggT	uncharacterized protein LOC101210772 [Cucumis sativus]	chr6	19544382	down2kb	19544458	down2kb	BNv1_06G18563	+	CCB3/YggT	uncharacterized protein LOC101210772 [Cucumis sativus]
BN-TDM9529	chr6	18061873	up2kb	18061915	up2kb	CsaV3_6G031940.1	+	Zinc finger, CCHC-type IPR003613	uncharacterized protein LOC101204547 isoform X2 [Cucumis sativus]	chr6	19544382	up2kb	19544458	up2kb	BNv1_06G18564	+	Zinc finger, CCHC-type IPR003613	uncharacterized protein LOC101204547 isoform X2 [Cucumis sativus]
BN-TDM9546	chr6	18461106	intron5	18461205	intron5	CsaV3_6G032520.1	+	CobW/HypB/UreG, nucleotide-binding domain IPR011629	hypothetical protein PRUPE_ppa007281mg [Prunus persica]	chr6	19924188	intron4	19924253	intron4	BNv1_06G18617	+	CobW/HypB/UreG, nucleotide-binding domain IPR011629	hypothetical protein PRUPE_ppa007281mg [Prunus persica]
BN-TDM9554	chr6	18536821	intron4	18536920	intron4	CsaV3_6G033600.1	+	CobW/HypB/UreG, nucleotide-binding domain IPR011629	hypothetical protein PRUPE_ppa007281mg [Prunus persica]	chr6	19924188	intron4	19924253	intron4	BNv1_06G18617	+	CobW/HypB/UreG, nucleotide-binding domain IPR011629	hypothetical protein PRUPE_ppa007281mg [Prunus persica]
BN-TDM9554	chr6	18536821	down2kb	18536920	down2kb	CsaV3_6G033590.1	+		-	chr6	19924188	-	19924253	-	-	-		-
BN-TDM9585	chr6	19129315	intron4	19129455	intron4	CsaV3_6G034260.1	-	ATPase, AAA-type, core IPR013748	replication factor C subunit 3 [Cucumis sativus]	chr6	20523301	intron4	20523564	intron4	BNv1_06G18684	-	ATPase, AAA-type, core IPR013748	replication factor C subunit 3 [Cucumis sativus]
BN-TDM9641	chr6	20191205	intron7	20191806	intron7	CsaV3_6G036340.1	+	Dehydrogenase, E1 component	pyruvate dehydrogenase E1 component subunit alpha-1, mitochondrial-like [Cucumis sativus]	chr6	21544317	intron7	21544813	intron7	BNv1_06G18784	+	Dehydrogenase, E1 component	pyruvate dehydrogenase E1 component subunit alpha-1, mitochondrial-like [Cucumis sativus]
BN-TDM9644	chr6	20259819	intron1	20259852	intron1	CsaV3_6G036430.1	-	NUDIX hydrolase domain IPR007722	mRNA-decapping enzyme subunit 2-like isoform X1 [Cucumis sativus]	chr6	21609727	intron1	21609790	intron1	BNv1_06G18794	-	NUDIX hydrolase domain IPR007722	mRNA-decapping enzyme subunit 2-like isoform X1 [Cucumis sativus]
BN-TDM9644	chr6	20259819	up2kb	20259852	up2kb	CsaV3_6G036450.1	+	GNAT domain	uncharacterized protein LOC101207861 [Cucumis sativus]	chr6	21609727	up2kb	21609790	up2kb	BNv1_06G18795	+	GNAT domain	uncharacterized protein LOC101207861 [Cucumis sativus]
BN-TDM9644	chr6	20259819	up2kb	20259852	up2kb	CsaV3_6G036440.1	+		-	chr6	21609727	-	21609790	-	-	-		-
BN-TDM9649	chr6	20348311	intron1	20348369	intron1	CsaV3_6G036550.1	+	Aromatic amino acid lyase	phenylalanine ammonia-lyase G4 [Cucumis sativus]	chr6	21699027	intron1	21699065	intron1	BNv1_06G18805	+	Aromatic amino acid lyase	phenylalanine ammonia-lyase G4 [Cucumis sativus]
BN-TDM9689	chr6	21118220	intron7	21118284	intron7	CsaV3_6G037410.1	-	Phosphatidylinositol-4-phosphate 5-kinase, core IPR003409	phosphatidylinositol 4-phosphate 5-kinase 8 isoform X2 [Fragaria vesca subsp. vesca]	chr6	22477962	intron7	22478055	intron7	BNv1_06G18887	-	Phosphatidylinositol-4-phosphate 5-kinase, core IPR003409	phosphatidylinositol 4-phosphate 5-kinase 8 isoform X2 [Fragaria vesca subsp. vesca]
BN-TDM9696	chr6	21166428	exon5	21167103	exon2	CsaV3_6G037440.1	-		-	chr6	22525770	exon3	22526299	exon2	BNv1_06G18888	-		-
BN-TDM9697	chr6	21167188	exon2	21168071	intron1	CsaV3_6G037440.1	-		-	chr6	22526385	exon2	22527064	intron1	BNv1_06G18888	-		-
BN-TDM9703	chr6	21194023	intron9	21194134	intron9	CsaV3_6G037480.1	-	Glycine cleavage T-protein-like, N-terminal IPR013977	aminomethyltransferase, mitochondrial [Cucumis sativus]	chr6	22553943	intron9	22554000	intron9	BNv1_06G18892	-	Glycine cleavage T-protein-like, N-terminal IPR013977	aminomethyltransferase, mitochondrial [Cucumis sativus]
BN-TDM9754	chr6	21833399	-	21833458	-	-	-		-	chr6	23195277	down2kb	23195389	down2kb	BNv1_06G18977	-	Protein kinase domain	mitogen-activated protein kinase kinase kinase NPK1 isoform X2 [Cucumis sativus]
BN-TDM9763	chr6	21919408	-	21919480	-	-	-		-	chr6	23281685	up2kb	23281725	up2kb	BNv1_06G18994	+		hypothetical protein Csa_6G425780 [Cucumis sativus]
BN-TDM9764	chr6	21928178	-	21928216	-	-	-		-	chr6	23290413	exon1	23290481	exon2	BNv1_06G18995	+	Ribonuclease CAF1	probable CCR4-associated factor 1 homolog 9 [Cucumis sativus]
BN-TDM9764	chr6	21928178	-	21928216	-	-	-		-	chr6	23290413	up2kb	23290481	up2kb	BNv1_06G18996	+	Domain of unknown function DUF1279	uncharacterized protein LOC101219558 [Cucumis sativus]
BN-TDM9776	chr6	22128506	-	22128556	-	-	-		-	chr6	23490392	intron1	23490479	intron1	BNv1_06G19020	+	Nuclear control of ATP synthase 2	hypothetical protein PRUPE_ppa020652mg, partial [Prunus persica]
BN-TDM9778	chr6	22155599	-	22155654	-	-	-		-	chr6	23520862	intron9	23520891	intron9	BNv1_06G19021	+	Aminotransferase class V domain IPR007230	hypothetical protein PRUPE_ppa000667mg [Prunus persica]
BN-TDM9779	chr6	22165218	-	22165340	-	-	-		-	chr6	23530459	intron8	23530694	intron8	BNv1_06G19023	+	Cyclin, C-terminal domain IPR006671	G2/mitotic-specific cyclin S13-7 [Cucumis sativus]
BN-TDM9779	chr6	22165218	-	22165340	-	-	-		-	chr6	23530459	-	23530694	down2kb	BNv1_06G19024	-		-
BN-TRANS2099	chr6	16757440	-	16757854	-	-	-		-	chr6	21378966	up2kb	21379379	-	BNv1_06G18761	-	GAF domain IPR003594	phytochrome A-like [Cucumis sativus]
BN-TRANS2100	chr6	18419988	intron1	18421960	intron1	CsaV3_6G032480.1	-	WRKY domain	hypothetical protein PRUPE_ppa008480mg [Prunus persica]	chr6	20578944	-	20580922	-	-	-		-
BN-TRANS2101	chr6	18508463	intron	18556391	intron	CsaV3_6G033570.1	-	UDP-glucose/GDP-mannose dehydrogenase, N-terminal IPR014026	UDP-glucose 6-dehydrogenase 1 [Cucumis sativus]	chr6	19895658	-	19943783	-	BNv1_06G18615	-	UDP-glucose/GDP-mannose dehydrogenase, N-terminal IPR014026	UDP-glucose 6-dehydrogenase 1 [Cucumis sativus]
BN-TRANS2101	chr6	18508463	intron	18556391	intron	CsaV3_6G033580.1	-	Glycoside hydrolase family 1	beta-glucosidase 40 [Cucumis sativus]	chr6	19895658	-	19943783	-	BNv1_06G18616	-	Glycoside hydrolase family 1	beta-glucosidase 40 [Cucumis sativus]
BN-TRANS2101	chr6	18508463	intron	18556391	intron	CsaV3_6G033600.1	+	CobW/HypB/UreG, nucleotide-binding domain IPR011629	hypothetical protein PRUPE_ppa007281mg [Prunus persica]	chr6	19895658	-	19943783	-	BNv1_06G18617	+	CobW/HypB/UreG, nucleotide-binding domain IPR011629	hypothetical protein PRUPE_ppa007281mg [Prunus persica]
BN-TRANS2101	chr6	18508463	intron	18556391	intron	CsaV3_6G033610.1	+	Protein KTI12/L-seryl-tRNA(Sec) kinase	hypothetical protein PHAVU_011G076500g [Phaseolus vulgaris]	chr6	19895658	-	19943783	-	BNv1_06G18618	+	Protein KTI12/L-seryl-tRNA(Sec) kinase	hypothetical protein PHAVU_011G076500g [Phaseolus vulgaris]
BN-TRANS2101	chr6	18508463	intron	18556391	intron	CsaV3_6G033620.1	-	Pentatricopeptide repeat	putative pentatricopeptide repeat-containing protein At1g26500 [Cucumis sativus]	chr6	19895658	-	19943783	-	BNv1_06G18621	-	Pentatricopeptide repeat	putative pentatricopeptide repeat-containing protein At1g26500 [Cucumis sativus]
BN-TRANS2101	chr6	18508463	intron	18556391	up2kb	CsaV3_6G033630.1	-	Band 7 domain	hypothetical protein POPTR_0010s16620g [Populus trichocarpa]	chr6	19895658	-	19943783	intron1	BNv1_06G18622	-	Band 7 domain	hypothetical protein POPTR_0010s16620g [Populus trichocarpa]
BN-TRANS2101	chr6	18508463	intron	18556391	up2kb	CsaV3_6G033640.1	+	Alpha/beta hydrolase fold-1	monoacylglycerol lipase ABHD6 [Cucumis sativus]	chr6	19895658	-	19943783	up2kb	BNv1_06G18623	+	Alpha/beta hydrolase fold-1	monoacylglycerol lipase ABHD6 [Cucumis sativus]
BN-TRANS2101	chr6	18508463	intron	18556391	intron	CsaV3_6G033590.1	+		-	chr6	19895658	-	19943783	-	-	-		-
BN-TRANS2101	chr6	18508463	-	18556391	-	-	-		-	chr6	19895658	intron1	19943783	-	BNv1_06G18614	-	WRKY domain	hypothetical protein PRUPE_ppa008480mg [Prunus persica]
BN-TRANS2101	chr6	18508463	-	18556391	-	-	-		-	chr6	19895658	-	19943783	-	BNv1_06G18619	-		-
BN-TRANS2101	chr6	18508463	-	18556391	-	-	-		-	chr6	19895658	-	19943783	-	BNv1_06G18620	-		-
BN-TRANS2102	chr6	19756244	intron2	19756630	intron2	CsaV3_6G035780.1	+	EAP30 IPR021648	vacuolar protein sorting-associated protein 36 [Cucumis sativus]	chr6	10954943	-	10955331	-	-	-		-
BN-TRANS2102	chr6	19756244	-	19756630	-	-	-		-	chr6	10954943	intron32	10955331	intron32	BNv1_06G17937	+	DNA-directed DNA polymerase, family B, exonuclease domain IPR006134	DNA polymerase epsilon catalytic subunit A-like [Cucumis sativus]
BN-CPG10013	chr6	26386321	up2kb	26386342	up2kb	CsaV3_6G044580.1	-	Myc-type, basic helix-loop-helix (bHLH) domain	transcription factor bHLH25-like [Cucumis sativus]	chr6	27874558	up2kb	27874631	up2kb	BNv1_06G19591	-	Myc-type, basic helix-loop-helix (bHLH) domain	transcription factor bHLH25-like [Cucumis sativus]
BN-CPG10013	chr6	26386321	down2kb	26386342	down2kb	CsaV3_6G044590.1	-		-	chr6	27874558	down2kb	27874631	down2kb	BNv1_06G19592	-		-
BN-CPG10013	chr6	26386321	down2kb	26386342	down2kb	CsaV3_6G044600.1	-	WD40 repeat	COMPASS-like H3K4 histone methylase component WDR5A [Cucumis sativus]	chr6	27874558	down2kb	27874631	down2kb	BNv1_06G19593	-	WD40 repeat	COMPASS-like H3K4 histone methylase component WDR5A [Cucumis sativus]
BN-CPG10037	chr6	27466405	down2kb	27466432	down2kb	CsaV3_6G046500.1	-	SAM dependent carboxyl methyltransferase	salicylate carboxymethyltransferase-like [Cucumis sativus]	chr6	28999479	down2kb	28999536	down2kb	BNv1_06G19768	-	SAM dependent carboxyl methyltransferase	salicylate carboxymethyltransferase-like [Cucumis sativus]
BN-CPG10068	chr6	28232640	down2kb	28232668	down2kb	CsaV3_6G047980.1	+	Histidine phosphatase superfamily, clade-1	uncharacterized protein LOC101211960 [Cucumis sativus]	chr6	29757596	down2kb	29757652	down2kb	BNv1_06G19912	+		uncharacterized protein LOC101211960 [Cucumis sativus]
BN-CPG10068	chr6	28232640	down2kb	28232668	down2kb	CsaV3_6G047990.1	-		-	chr6	29757596	down2kb	29757652	down2kb	BNv1_06G19913	-		-
BN-CPG10068	chr6	28232640	up2kb	28232668	up2kb	CsaV3_6G048000.1	+	Serine aminopeptidase, S33	uncharacterized protein LOC101211724 isoform X1 [Cucumis sativus]	chr6	29757596	up2kb	29757652	up2kb	BNv1_06G19914	+	Serine aminopeptidase, S33	uncharacterized protein LOC101211724 isoform X1 [Cucumis sativus]
BN-CPG10081	chr6	28397523	down2kb	28397603	down2kb	CsaV3_6G048410.1	+	Pentatricopeptide repeat	pentatricopeptide repeat-containing protein At4g16470 [Cucumis sativus]	chr6	29922455	down2kb	29922617	down2kb	BNv1_06G19954	+	Pentatricopeptide repeat	pentatricopeptide repeat-containing protein At4g16470 [Cucumis sativus]
BN-CPG10081	chr6	28397523	up2kb	28397603	up2kb	CsaV3_6G048420.1	+		-	chr6	29922455	-	29922617	-	-	-		-
BN-CPG10098	chr6	28670106	exon9	28670122	exon9	CsaV3_6G048970.1	+	Glyoxalase/fosfomycin resistance/dioxygenase domain	putative lactoylglutathione lyase [Cucumis sativus]	chr6	30194699	down2kb	30194811	down2kb	BNv1_06G20009	+	Glyoxalase/fosfomycin resistance/dioxygenase domain	putative lactoylglutathione lyase [Cucumis sativus]
BN-CPG10098	chr6	28670106	down2kb	28670122	down2kb	CsaV3_6G048980.1	-	Prephenate dehydratase	arogenate dehydratase/prephenate dehydratase 1, chloroplastic [Cucumis sativus]	chr6	30194699	down2kb	30194811	down2kb	BNv1_06G20010	-	Prephenate dehydratase	arogenate dehydratase/prephenate dehydratase 1, chloroplastic [Cucumis sativus]
BN-CPG10125	chr6	29313199	down2kb	29313249	exon15	CsaV3_6G050250.1	-		glyoxysomal processing protease, glyoxysomal [Cucumis sativus]	chr6	30850185	down2kb	30850287	down2kb	BNv1_06G20132	-		glyoxysomal processing protease, glyoxysomal [Cucumis sativus]
BN-CPG10127	chr6	29436963	up2kb	29437039	up2kb	CsaV3_6G050470.1	-	Mlo-related protein	MLO-like protein 12 isoform X1 [Cucumis sativus]	chr6	30973708	intron10	30973939	intron10	BNv1_06G20154	-	B3 DNA binding domain IPR004326	auxin response factor 3 isoform X2 [Cucumis sativus]
BN-CPG10127	chr6	29436963	down2kb	29437039	down2kb	CsaV3_6G050480.1	-	B3 DNA binding domain IPR010525	auxin response factor 3 isoform X2 [Cucumis sativus]	chr6	30973708	intron10	30973939	intron10	BNv1_06G20154	-	B3 DNA binding domain IPR004326	auxin response factor 3 isoform X2 [Cucumis sativus]
BN-CPG10136	chr6	29771345	exon1	29771386	up2kb	CsaV3_6G051120.1	-	Heat shock factor (HSF)-type, DNA-binding	heat stress transcription factor A-4c-like isoform X1 [Cucumis sativus]	chr6	31311679	intron1	31311761	intron1	BNv1_06G20217	-	Heat shock factor (HSF)-type, DNA-binding IPR004274	heat stress transcription factor A-4c-like isoform X1 [Cucumis sativus]
BN-CPG10136	chr6	29771345	down2kb	29771386	down2kb	CsaV3_6G051130.1	-	FCP1 homology domain	carboxy-terminal domain RNA polymerase II polypeptide A small phosphatase 1 [Cucumis sativus]	chr6	31311679	intron1	31311761	intron1	BNv1_06G20217	-	Heat shock factor (HSF)-type, DNA-binding IPR004274	heat stress transcription factor A-4c-like isoform X1 [Cucumis sativus]
BN-CPG10137	chr6	29922990	up2kb	29923016	up2kb	CsaV3_6G051430.1	-	X8 domain	PLASMODESMATA CALLOSE-BINDING PROTEIN 3-like [Cucumis sativus]	chr6	31463319	up2kb	31463381	up2kb	BNv1_06G20245	-	X8 domain	PLASMODESMATA CALLOSE-BINDING PROTEIN 3-like [Cucumis sativus]
BN-CPG10137	chr6	29922990	up2kb	29923016	up2kb	CsaV3_6G051440.1	+	GBF-interacting protein 1	uncharacterized protein LOC101211388 isoform X2 [Cucumis sativus]	chr6	31463319	up2kb	31463381	up2kb	BNv1_06G20246	+	GBF-interacting protein 1	uncharacterized protein LOC101211388 isoform X2 [Cucumis sativus]
BN-CPG10161	chr6	30371188	intron5	30371201	intron5	CsaV3_6G052190.1	+	BRCT domain	protein BREAST CANCER SUSCEPTIBILITY 1 homolog [Cucumis sativus]	chr6	31912397	intron5	31912448	intron5	BNv1_06G20316	+	BRCT domain	protein BREAST CANCER SUSCEPTIBILITY 1 homolog [Cucumis sativus]
BN-CPG10172	chr6	30587905	exon2	30587910	exon2	CsaV3_6G052440.1	-	Cupin 1	putative germin-like protein 2-1 [Cucumis sativus]	chr6	32127764	down2kb	32128582	down2kb	BNv1_06G20339	-	Cupin 1	putative germin-like protein 2-1 [Cucumis sativus]
BN-CPG10172	chr6	30587905	exon2	30587910	exon2	CsaV3_6G052450.1	+	ATPase, AAA-type, core IPR019787	hypothetical protein PRUPE_ppa016720mg [Prunus persica]	chr6	32127764	exon1	32128582	down2kb	BNv1_06G20338	+	Bromo adjacent homology (BAH) domain IPR003959	hypothetical protein PRUPE_ppa016720mg [Prunus persica]
BN-CPL10041	chr6	27560297	intron7	27560377	intron7	CsaV3_6G046700.1	+		hypothetical protein PRUPE_ppa005288mg [Prunus persica]	chr6	29093581	intron7	29093596	intron7	BNv1_06G19787	+		hypothetical protein PRUPE_ppa005288mg [Prunus persica]
BN-CPL10082	chr6	28421858	up2kb	28422163	up2kb	CsaV3_6G048470.1	+	HECT domain IPR000626	E3 ubiquitin-protein ligase UPL5 [Cucumis sativus]	chr6	29946862	up2kb	29947015	up2kb	BNv1_06G19961	+	HECT domain IPR000626	E3 ubiquitin-protein ligase UPL5 [Cucumis sativus]
BN-CPL10082	chr6	28421858	up2kb	28422163	intron	CsaV3_6G048460.1	-	Inositol monophosphatase-like	inositol-phosphate phosphatase-like isoform X2 [Cucumis sativus]	chr6	29946862	-	29947015	-	-	-		-
BN-CPL10084	chr6	28449346	exon1	28449583	up2kb	CsaV3_6G048520.1	-	Fumarylacetoacetase, C-terminal-related IPR015377	fumarylacetoacetase [Cucumis sativus]	chr6	29974267	up2kb	29974272	up2kb	BNv1_06G19966	-	Fumarylacetoacetase, C-terminal-related IPR015377	fumarylacetoacetase [Cucumis sativus]
BN-CPL10084	chr6	28449346	up2kb	28449583	up2kb	CsaV3_6G048530.1	+		-	chr6	29974267	up2kb	29974272	up2kb	BNv1_06G19967	+		-
BN-CPL10084	chr6	28449346	up2kb	28449583	up2kb	CsaV3_6G048540.1	+		phosphatidate cytidylyltransferase 1 [Cucumis sativus]	chr6	29974267	up2kb	29974272	up2kb	BNv1_06G19968	+		phosphatidate cytidylyltransferase 1 [Cucumis sativus]
BN-CPL10094	chr6	28559232	intron2	28559322	intron2	CsaV3_6G048730.1	+	ELK domain IPR005540	homeodomain protein Kn1 [Prunus dulcis]	chr6	30084038	intron2	30084051	intron2	BNv1_06G19986	+	ELK domain IPR005540	homeodomain protein Kn1 [Prunus dulcis]
BN-CPL10103	chr6	28781635	up2kb	28781722	up2kb	CsaV3_6G049190.1	-	CRIB domain	CRIB domain-containing protein RIC10 [Cucumis sativus]	chr6	30308778	up2kb	30308820	up2kb	BNv1_06G20029	-	CRIB domain	CRIB domain-containing protein RIC10 [Cucumis sativus]
BN-CPL10103	chr6	28781635	down2kb	28781722	down2kb	CsaV3_6G049200.1	-	Pectinesterase, catalytic IPR006501	Pectinesterase [Cucumis sativus]	chr6	30308778	down2kb	30308820	down2kb	BNv1_06G20030	-	Pectinesterase, catalytic IPR006501	Pectinesterase [Cucumis sativus]
BN-CPL10111	chr6	28866556	up2kb	28866651	up2kb	CsaV3_6G049380.1	-	Serine-threonine/tyrosine-protein kinase, catalytic domain IPR002902	uncharacterized protein LOC102628483 [Citrus sinensis]	chr6	30395338	up2kb	30395384	up2kb	BNv1_06G20050	-	Serine-threonine/tyrosine-protein kinase, catalytic domain IPR002902	uncharacterized protein LOC102628483 [Citrus sinensis]
BN-CPL10111	chr6	28866556	up2kb	28866651	up2kb	CsaV3_6G049390.1	+	Gnk2-homologous domain	Cysteine-rich receptor-like protein kinase [Medicago truncatula]	chr6	30395338	up2kb	30395384	up2kb	BNv1_06G20051	+	Gnk2-homologous domain	Cysteine-rich receptor-like protein kinase [Medicago truncatula]
BN-CPL10130	chr6	29551479	down2kb	29551536	down2kb	CsaV3_6G050690.1	+		uncharacterized protein At4g18490-like [Glycine max]	chr6	31088479	down2kb	31088507	down2kb	BNv1_06G20174	+		uncharacterized protein At4g18490-like [Glycine max]
BN-CPL10130	chr6	29551479	down2kb	29551536	down2kb	CsaV3_6G050690.1	+		uncharacterized protein At4g18490-like [Glycine max]	chr6	31088479	up2kb	31088507	up2kb	BNv1_06G20175	+		-
BN-CPL10130	chr6	29551479	up2kb	29551536	up2kb	CsaV3_6G050700.1	+		-	chr6	31088479	up2kb	31088507	up2kb	BNv1_06G20175	+		-
BN-CPL10130	chr6	29551479	up2kb	29551536	up2kb	CsaV3_6G050700.1	+		-	chr6	31088479	down2kb	31088507	down2kb	BNv1_06G20174	+		uncharacterized protein At4g18490-like [Glycine max]
BN-CPL10149	chr6	30226094	down2kb	30226157	down2kb	CsaV3_6G051930.1	+	WD40 repeat	p21-activated protein kinase-interacting protein 1-like [Cucumis sativus]	chr6	31767728	intron2	31767759	intron2	BNv1_06G20293	+	WD40 repeat IPR005045	putative ALA-interacting subunit 2 [Cucumis sativus]
BN-CPL10149	chr6	30226094	up2kb	30226157	up2kb	CsaV3_6G051940.1	+	CDC50/LEM3 family	putative ALA-interacting subunit 2 [Cucumis sativus]	chr6	31767728	intron2	31767759	intron2	BNv1_06G20293	+	WD40 repeat IPR005045	putative ALA-interacting subunit 2 [Cucumis sativus]
BN-CPL10158	chr6	30288167	exon1	30288217	exon1	CsaV3_6G052050.1	+	Remorin, C-terminal	uncharacterized protein LOC101217408 [Cucumis sativus]	chr6	31829482	up2kb	31829502	up2kb	BNv1_06G20302	+	Remorin, C-terminal	uncharacterized protein LOC101217408 [Cucumis sativus]
BN-CPL10164	chr6	30407459	intron11	30407714	intron11	CsaV3_6G052230.1	+	ABC transporter-like IPR011527	Multidrug resistance-associated protein 2 isoform 1 [Theobroma cacao]	chr6	31948492	intron10	31948606	intron10	BNv1_06G20320	+	ABC transporter-like IPR011527	Multidrug resistance-associated protein 2 isoform 1 [Theobroma cacao]
BN-CPL10173	chr6	30596600	up2kb	30596660	up2kb	CsaV3_6G052480.1	-	Cupin 1	putative germin-like protein 2-1 [Cucumis sativus]	chr6	32137241	up2kb	32137265	up2kb	BNv1_06G20342	-	Cupin 1	putative germin-like protein 2-1 [Cucumis sativus]
BN-CPL10173	chr6	30596600	up2kb	30596660	up2kb	CsaV3_6G052480.1	-	Cupin 1	putative germin-like protein 2-1 [Cucumis sativus]	chr6	32137241	down2kb	32137265	down2kb	BNv1_06G20343	-	Cupin 1	germin-like protein 8-2 [Cucumis sativus]
BN-CPL10173	chr6	30596600	down2kb	30596660	down2kb	CsaV3_6G052490.1	-	Cupin 1	germin-like protein 8-2 [Cucumis sativus]	chr6	32137241	down2kb	32137265	down2kb	BNv1_06G20343	-	Cupin 1	germin-like protein 8-2 [Cucumis sativus]
BN-CPL10173	chr6	30596600	down2kb	30596660	down2kb	CsaV3_6G052490.1	-	Cupin 1	germin-like protein 8-2 [Cucumis sativus]	chr6	32137241	up2kb	32137265	up2kb	BNv1_06G20342	-	Cupin 1	putative germin-like protein 2-1 [Cucumis sativus]
BN-DEL10009	chr6	26135772	up2kb	26136080	up2kb	CsaV3_6G044250.1	+	VQ	VQ motif-containing protein, putative [Theobroma cacao]	chr6	27624340	-	27624344	-	-	-		-
BN-DEL10010	chr6	26168136	exon1	26168204	exon1	CsaV3_6G044300.1	+	Basic-leucine zipper domain	hypothetical protein CICLE_v10027584mg [Citrus clementina]	chr6	27656432	up2kb	27656434	up2kb	BNv1_06G19562	+	Basic-leucine zipper domain	hypothetical protein CICLE_v10027584mg [Citrus clementina]
BN-DEL10014	chr6	26645708	intron5	26645889	intron5	CsaV3_6G045040.1	+	Kinesin motor domain	kinesin-like protein KCA1 [Cucumis sativus]	chr6	28133984	intron5	28133988	intron5	BNv1_06G19632	+	Kinesin motor domain	kinesin-like protein KCA1 [Cucumis sativus]
BN-DEL10018	chr6	26734410	down2kb	26734614	down2kb	CsaV3_6G045160.1	-		-	chr6	28222624	down2kb	28222625	down2kb	BNv1_06G19643	-		-
BN-DEL10029	chr6	27214916	down2kb	27215026	down2kb	CsaV3_6G045980.1	+	BES1/BZR1 plant transcription factor, N-terminal	BES1/BZR1 homolog protein 2 [Cucumis sativus]	chr6	28747455	down2kb	28747456	down2kb	BNv1_06G19721	+	BES1/BZR1 plant transcription factor, N-terminal	BES1/BZR1 homolog protein 2 [Cucumis sativus]
BN-DEL10048	chr6	27680500	up2kb	27680773	up2kb	CsaV3_6G046900.1	-	B-box-type zinc finger	B-box zinc finger protein 18 isoform X1 [Cucumis sativus]	chr6	29214202	up2kb	29214205	up2kb	BNv1_06G19805	-	B-box-type zinc finger	B-box zinc finger protein 18 isoform X1 [Cucumis sativus]
BN-DEL10049	chr6	27754266	down2kb	27754328	down2kb	CsaV3_6G047040.1	+	Alpha-ketoglutarate-dependent dioxygenase AlkB-like	uncharacterized protein LOC101203292 [Cucumis sativus]	chr6	29287709	-	29287709	-	-	-		-
BN-DEL10051	chr6	27850526	up2kb	27850649	up2kb	CsaV3_6G047180.1	-	Gnk2-homologous domain	cysteine-rich receptor-like protein kinase 26 [Cucumis sativus]	chr6	29383876	up2kb	29383880	up2kb	BNv1_06G19831	-	Gnk2-homologous domain	cysteine-rich receptor-like protein kinase 26 [Cucumis sativus]
BN-DEL10051	chr6	27850526	up2kb	27850649	up2kb	CsaV3_6G047190.1	+	Thaumatin	thaumatin-like protein 1b [Cucumis sativus]	chr6	29383876	up2kb	29383880	up2kb	BNv1_06G19832	+	Thaumatin	thaumatin-like protein 1b [Cucumis sativus]
BN-DEL10053	chr6	27864126	down2kb	27864253	down2kb	CsaV3_6G047200.1	+	Thaumatin	Pathogenesis-related thaumatin superfamily protein [Theobroma cacao]	chr6	29397366	-	29397366	-	-	-		-
BN-DEL10062	chr6	28147731	down2kb	28147942	down2kb	CsaV3_6G047800.1	+	Hexapeptide repeat IPR010493	serine acetyltransferase 2 [Cucumis sativus]	chr6	29672798	down2kb	29672800	down2kb	BNv1_06G19893	+	Hexapeptide repeat IPR010493	serine acetyltransferase 2 [Cucumis sativus]
BN-DEL10062	chr6	28147731	down2kb	28147942	down2kb	CsaV3_6G047810.1	-	Cyclin, C-terminal domain IPR006671	G2/mitotic-specific cyclin-1-like isoform X1 [Citrus sinensis]	chr6	29672798	down2kb	29672800	down2kb	BNv1_06G19895	-	Cyclin, C-terminal domain IPR006671	G2/mitotic-specific cyclin-1-like isoform X1 [Citrus sinensis]
BN-DEL10062	chr6	28147731	-	28147942	-	-	-		-	chr6	29672798	intron1	29672800	intron1	BNv1_06G19894	-		-
BN-DEL10085	chr6	28449896	up2kb	28449963	up2kb	CsaV3_6G048520.1	-	Fumarylacetoacetase, C-terminal-related IPR015377	fumarylacetoacetase [Cucumis sativus]	chr6	29974585	up2kb	29974585	up2kb	BNv1_06G19966	-	Fumarylacetoacetase, C-terminal-related IPR015377	fumarylacetoacetase [Cucumis sativus]
BN-DEL10085	chr6	28449896	up2kb	28449963	up2kb	CsaV3_6G048530.1	+		-	chr6	29974585	up2kb	29974585	up2kb	BNv1_06G19967	+		-
BN-DEL10085	chr6	28449896	up2kb	28449963	up2kb	CsaV3_6G048540.1	+		phosphatidate cytidylyltransferase 1 [Cucumis sativus]	chr6	29974585	up2kb	29974585	up2kb	BNv1_06G19968	+		phosphatidate cytidylyltransferase 1 [Cucumis sativus]
BN-DEL10097	chr6	28663844	up2kb	28663901	up2kb	CsaV3_6G048960.1	-	Phosphoadenosine phosphosulphate reductase IPR013766	5'-adenylylsulfate reductase 1, chloroplastic [Cucumis sativus]	chr6	30188496	-	30188496	-	-	-		-
BN-DEL10099	chr6	28685421	intron6	28685505	intron6	CsaV3_6G049030.1	-	Glycosyl transferase, family 31 IPR025298	probable beta-1,3-galactosyltransferase 2 [Cucumis sativus]	chr6	30210100	intron4	30210100	intron4	BNv1_06G20013	-	Glycosyl transferase, family 31 IPR004241	probable beta-1,3-galactosyltransferase 2 [Cucumis sativus]
BN-DEL10100	chr6	28708213	intron1	28708342	intron1	CsaV3_6G049080.1	-	Senescence regulator S40	uncharacterized protein LOC101218032 [Cucumis sativus]	chr6	30232833	intron1	30232834	intron1	BNv1_06G20018	-	Senescence regulator S40	uncharacterized protein LOC101218032 [Cucumis sativus]
BN-DEL10119	chr6	28989487	down2kb	28989560	down2kb	CsaV3_6G049680.1	+	LysM domain	hypothetical protein PRUPE_ppa021979mg [Prunus persica]	chr6	30517826	down2kb	30517827	down2kb	BNv1_06G20079	+	LysM domain	hypothetical protein PRUPE_ppa021979mg [Prunus persica]
BN-DEL10119	chr6	28989487	down2kb	28989560	down2kb	CsaV3_6G049680.1	+	LysM domain	hypothetical protein PRUPE_ppa021979mg [Prunus persica]	chr6	30517826	up2kb	30517827	up2kb	BNv1_06G20080	+	LysM domain	hypothetical protein VITISV_011099 [Vitis vinifera]
BN-DEL10119	chr6	28989487	up2kb	28989560	up2kb	CsaV3_6G049690.1	+	LysM domain	hypothetical protein VITISV_011099 [Vitis vinifera]	chr6	30517826	up2kb	30517827	up2kb	BNv1_06G20080	+	LysM domain	hypothetical protein VITISV_011099 [Vitis vinifera]
BN-DEL10119	chr6	28989487	up2kb	28989560	up2kb	CsaV3_6G049690.1	+	LysM domain	hypothetical protein VITISV_011099 [Vitis vinifera]	chr6	30517826	down2kb	30517827	down2kb	BNv1_06G20079	+	LysM domain	hypothetical protein PRUPE_ppa021979mg [Prunus persica]
BN-DEL10121	chr6	29015645	down2kb	29015734	down2kb	CsaV3_6G049740.1	-		uncharacterized protein LOC102595206 [Solanum tuberosum]	chr6	30543719	down2kb	30543719	down2kb	BNv1_06G20084	-		uncharacterized protein LOC102595206 [Solanum tuberosum]
BN-DEL10135	chr6	29737100	intron3	29737281	intron3	CsaV3_6G051060.1	+	Glycosyl transferase, family 20 IPR003337	trehalose-6-phosphate synthase [Cucumis melo subsp. melo]	chr6	31277616	intron2	31277620	intron2	BNv1_06G20211	+	Glycosyl transferase, family 20 IPR003337	trehalose-6-phosphate synthase [Cucumis melo subsp. melo]
BN-DEL10139	chr6	30025213	down2kb	30025296	down2kb	CsaV3_6G051610.1	+	Uncharacterised protein family Ycf23	uncharacterized protein ycf23-like [Cucumis sativus]	chr6	31565781	intron11	31565782	intron11	BNv1_06G20263	+	Uncharacterised protein family Ycf23	uncharacterized protein ycf23-like [Cucumis sativus]
BN-DEL10139	chr6	30025213	down2kb	30025296	down2kb	CsaV3_6G051620.1	-	High mobility group box domain	high mobility group B protein 14 [Cucumis sativus]	chr6	31565781	-	31565782	-	-	-		-
BN-DEL10141	chr6	30043438	up2kb	30043583	up2kb	CsaV3_6G051660.1	-	Ribosomal protein 50S-L18Ae/60S-L20/60S-L18A	60S ribosomal protein L18a [Cucumis sativus]	chr6	31583984	up2kb	31583988	up2kb	BNv1_06G20266	-	Ribosomal protein 50S-L18Ae/60S-L20/60S-L18A	60S ribosomal protein L18a [Cucumis sativus]
BN-DEL10147	chr6	30184073	exon8	30184124	exon8	CsaV3_6G051840.1	+	K Homology domain, type 1	KH domain-containing protein At4g18375 [Cucumis sativus]	chr6	31725759	down2kb	31725759	down2kb	BNv1_06G20285	+	K Homology domain, type 1	KH domain-containing protein At4g18375 [Cucumis sativus]
BN-DEL10170	chr6	30572108	intron4	30572228	intron4	CsaV3_6G052390.1	+		WPP domain-associated protein [Cucumis sativus]	chr6	32112091	intron3	32112094	intron3	BNv1_06G20333	+		WPP domain-associated protein [Cucumis sativus]
BN-DUP3725	chr6	13731671	-	13732057	-	-	-		-	chr6	30731061	down2kb	30731447	down2kb	BNv1_06G20114	+	Transposase, MuDR, plant IPR018289	uncharacterized protein LOC102620129 [Citrus sinensis]
BN-DUP3871	chr6	26864692	intron	26906444	intron	CsaV3_6G045350.1	+	UDP-glucuronosyl/UDP-glucosyltransferase	7-deoxyloganetin glucosyltransferase-like isoform X2 [Cucumis sativus]	chr6	28396630	intron1	28438382	-	BNv1_06G19660	+	UDP-glucuronosyl/UDP-glucosyltransferase	7-deoxyloganetin glucosyltransferase-like isoform X2 [Cucumis sativus]
BN-DUP3871	chr6	26864692	intron	26906444	intron	CsaV3_6G045380.1	-		protein SENSITIVE TO PROTON RHIZOTOXICITY 1-like [Cucumis sativus]	chr6	28396630	-	28438382	-	BNv1_06G19661	-		protein SENSITIVE TO PROTON RHIZOTOXICITY 1-like [Cucumis sativus]
BN-DUP3871	chr6	26864692	intron	26906444	intron	CsaV3_6G045400.1	-	SANT/Myb domain	myb-related protein Hv1 [Cucumis sativus]	chr6	28396630	-	28438382	-	BNv1_06G19662	-	SANT/Myb domain	myb-related protein Hv1 [Cucumis sativus]
BN-DUP3871	chr6	26864692	intron	26906444	exon1	CsaV3_6G045410.1	-	Mitochondrial substrate/solute carrier	probable mitochondrial adenine nucleotide transporter BTL3 [Cucumis sativus]	chr6	28396630	-	28438382	up2kb	BNv1_06G19663	-	Mitochondrial substrate/solute carrier	probable mitochondrial adenine nucleotide transporter BTL3 [Cucumis sativus]
BN-DUP3871	chr6	26864692	up2kb	26906444	intron	CsaV3_6G045340.1	+	HAD-like domain	haloacid dehalogenase-like hydrolase domain-containing protein At4g39970 [Cucumis sativus]	chr6	28396630	-	28438382	-	-	-		-
BN-DUP3871	chr6	26864692	intron	26906444	intron	CsaV3_6G045360.1	-	Alpha/beta hydrolase fold-1	epoxide hydrolase 4 [Cucumis sativus]	chr6	28396630	-	28438382	-	-	-		-
BN-DUP3871	chr6	26864692	intron	26906444	intron	CsaV3_6G045370.1	-		Uncharacterized protein TCM_001093 [Theobroma cacao]	chr6	28396630	-	28438382	-	-	-		-
BN-DUP3871	chr6	26864692	intron	26906444	intron	CsaV3_6G045390.1	+		-	chr6	28396630	-	28438382	-	-	-		-
BN-DUP3872	chr6	28118490	down2kb	28120453	exon1	CsaV3_6G047730.1	-	Glycoside hydrolase, family 19, catalytic	endochitinase-like [Cucumis sativus]	chr6	29642381	down2kb	29644288	exon2	BNv1_06G19885	-	Glycoside hydrolase, family 19, catalytic IPR001002	endochitinase-like [Cucumis sativus]
BN-DUP3872	chr6	28118490	down2kb	28120453	exon1	CsaV3_6G047730.1	-	Glycoside hydrolase, family 19, catalytic	endochitinase-like [Cucumis sativus]	chr6	29642381	up2kb	29644288	-	BNv1_06G19884	-	Glycoside hydrolase, family 19, catalytic IPR001002	endochitinase-like [Cucumis sativus]
BN-DUP3873	chr6	29565956	intron1	29567419	exon5	CsaV3_6G050740.1	+	GDSL lipase/esterase	GDSL esterase/lipase At1g28570 [Cucumis sativus]	chr6	31103661	exon1	31105128	down2kb	BNv1_06G20178	+	GDSL lipase/esterase	GDSL esterase/lipase At1g28570 [Cucumis sativus]
BN-DUP3873	chr6	29565956	down2kb	29567419	down2kb	CsaV3_6G050750.1	-	Pentatricopeptide repeat	pentatricopeptide repeat-containing protein At5g66520-like [Cucumis sativus]	chr6	31103661	-	31105128	-	-	-		-
BN-DUP3874	chr6	30261788	exon1	30262335	exon1	CsaV3_6G051990.1	-		uncharacterized protein LOC101213807 [Cucumis sativus]	chr6	18928171	-	18928716	-	-	-		-
BN-DUP3874	chr6	30261788	-	30262335	-	-	-		-	chr6	18928171	down2kb	18928716	down2kb	BNv1_06G18496	-		-
BN-DUP6033	chr2	15397536	-	15398734	-	-	-		-	chr6	31705160	intron17	31706387	intron17	BNv1_06G20284	-		P-loop containing nucleoside triphosphate hydrolases superfamily protein isoform 1 [Theobroma cacao]
BN-DUP6521	chr3	15111478	-	15112619	-	-	-		-	chr6	31705034	intron17	31706177	intron17	BNv1_06G20284	-		P-loop containing nucleoside triphosphate hydrolases superfamily protein isoform 1 [Theobroma cacao]
BN-DUP7437	chr4	17182975	-	17184115	-	-	-		-	chr6	31705033	intron17	31706177	intron17	BNv1_06G20284	-		P-loop containing nucleoside triphosphate hydrolases superfamily protein isoform 1 [Theobroma cacao]
BN-DUP9043	chr6	29338692	intron4	29339087	intron4	CsaV3_6G050300.1	-	Zinc finger, CCCH-type	uncharacterized protein LOC105434414 [Cucumis sativus]	chr4	18872950	-	18873345	-	-	-		-
BN-DUP9043	chr6	29338692	-	29339087	-	-	-		-	chr4	18872950	intron9	18873345	intron9	BNv1_04G12441	-	Protein kinase domain	shaggy-related protein kinase kappa [Cucumis sativus]
BN-DUP9045	chr6	30724411	intron	30725230	up2kb	CsaV3_6G052720.1	+	Patatin-like phospholipase domain	patatin-like protein 3 [Cucumis sativus]	chr1	12142694	-	12143488	-	-	-		-
BN-HDR10005	chr6	26055325	up2kb	26055691	up2kb	CsaV3_6G044120.1	-	SANT/Myb domain	transcription factor DIVARICATA-like [Cucumis sativus]	chr6	27538635	up2kb	27538952	up2kb	BNv1_06G19543	-	SANT/Myb domain	transcription factor DIVARICATA-like [Cucumis sativus]
BN-HDR10005	chr6	26055325	up2kb	26055691	up2kb	CsaV3_6G044130.1	+	Ribosomal protein L26/L24, eukaryotic/archaeal IPR005824	60S ribosomal protein L26-1 [Cucumis sativus]	chr6	27538635	up2kb	27538952	up2kb	BNv1_06G19544	+	Ribosomal protein L26/L24, eukaryotic/archaeal IPR005824	60S ribosomal protein L26-1 [Cucumis sativus]
BN-HDR10008	chr6	26126863	up2kb	26127126	up2kb	CsaV3_6G044230.1	-	TIP49, C-terminal	ruvB-like 2 [Cucumis sativus]	chr6	27615434	up2kb	27615663	up2kb	BNv1_06G19555	-	TIP49, C-terminal	ruvB-like 2 [Cucumis sativus]
BN-HDR10008	chr6	26126863	intron1	26127126	intron1	CsaV3_6G044240.1	-		Uncharacterized protein TCM_000822 [Theobroma cacao]	chr6	27615434	intron1	27615663	intron1	BNv1_06G19556	-		Uncharacterized protein TCM_000822 [Theobroma cacao]
BN-HDR10011	chr6	26269524	down2kb	26269582	down2kb	CsaV3_6G044420.1	-	Aminotransferase class IV	branched-chain-amino-acid aminotransferase 3, chloroplastic-like [Cucumis sativus]	chr6	27757783	down2kb	27757783	down2kb	BNv1_06G19575	-	Aminotransferase class IV	branched-chain-amino-acid aminotransferase 3, chloroplastic-like [Cucumis sativus]
BN-HDR10019	chr6	26743688	down2kb	26744152	down2kb	CsaV3_6G045170.1	+	Multi antimicrobial extrusion protein	protein TRANSPARENT TESTA 12 [Cucumis sativus]	chr6	28231666	intron7	28232436	intron7	BNv1_06G19644	+	Multi antimicrobial extrusion protein	protein TRANSPARENT TESTA 12 [Cucumis sativus]
BN-HDR10019	chr6	26743688	up2kb	26744152	up2kb	CsaV3_6G045180.1	+	Multi antimicrobial extrusion protein	protein TRANSPARENT TESTA 12 [Cucumis sativus]	chr6	28231666	intron7	28232436	intron7	BNv1_06G19644	+	Multi antimicrobial extrusion protein	protein TRANSPARENT TESTA 12 [Cucumis sativus]
BN-HDR10021	chr6	26766640	down2kb	26766865	down2kb	CsaV3_6G045210.1	-	Glycoside hydrolase, family 5	probable glucan 1,3-beta-glucosidase A [Cucumis sativus]	chr6	28254890	down2kb	28255063	down2kb	BNv1_06G19648	-	Glycoside hydrolase, family 5	probable glucan 1,3-beta-glucosidase A [Cucumis sativus]
BN-HDR10024	chr6	27118751	intron1	27118757	intron1	CsaV3_6G045790.1	-	Gamma-glutamyltranspeptidase	gamma-glutamyltranspeptidase 1 [Cucumis sativus]	chr6	28650757	intron1	28650977	intron1	BNv1_06G19702	-	Gamma-glutamyltranspeptidase	gamma-glutamyltranspeptidase 1 [Cucumis sativus]
BN-HDR10024	chr6	27118751	down2kb	27118757	down2kb	CsaV3_6G045800.1	-		-	chr6	28650757	down2kb	28650977	down2kb	BNv1_06G19703	-		-
BN-HDR10024	chr6	27118751	down2kb	27118757	down2kb	CsaV3_6G045810.1	-		-	chr6	28650757	intron1	28650977	intron1	BNv1_06G19702	-	Gamma-glutamyltranspeptidase	gamma-glutamyltranspeptidase 1 [Cucumis sativus]
BN-HDR10026	chr6	27142771	down2kb	27142868	down2kb	CsaV3_6G045870.1	+	Cytochrome P450	cytochrome P450 CYP736A12-like [Cucumis sativus]	chr6	28675036	down2kb	28675039	down2kb	BNv1_06G19710	+	Cytochrome P450	cytochrome P450 CYP736A12-like [Cucumis sativus]
BN-HDR10026	chr6	27142771	down2kb	27142868	down2kb	CsaV3_6G045870.1	+	Cytochrome P450	cytochrome P450 CYP736A12-like [Cucumis sativus]	chr6	28675036	down2kb	28675039	down2kb	BNv1_06G19711	-	Cytochrome P450	cytochrome P450 CYP736A12-like [Cucumis sativus]
BN-HDR10026	chr6	27142771	down2kb	27142868	down2kb	CsaV3_6G045880.1	-	Cytochrome P450	cytochrome P450 CYP736A12-like [Cucumis sativus]	chr6	28675036	down2kb	28675039	down2kb	BNv1_06G19711	-	Cytochrome P450	cytochrome P450 CYP736A12-like [Cucumis sativus]
BN-HDR10026	chr6	27142771	down2kb	27142868	down2kb	CsaV3_6G045880.1	-	Cytochrome P450	cytochrome P450 CYP736A12-like [Cucumis sativus]	chr6	28675036	down2kb	28675039	down2kb	BNv1_06G19710	+	Cytochrome P450	cytochrome P450 CYP736A12-like [Cucumis sativus]
BN-HDR10038	chr6	27519557	down2kb	27519600	down2kb	CsaV3_6G046600.1	+	ATPase, AAA-type, core IPR025753	uncharacterized protein LOC101205613 [Cucumis sativus]	chr6	29052735	down2kb	29053003	-	BNv1_06G19778	+	ATPase, AAA-type, core IPR025753	uncharacterized protein LOC101205613 [Cucumis sativus]
BN-HDR10038	chr6	27519557	down2kb	27519600	down2kb	CsaV3_6G046600.1	+	ATPase, AAA-type, core IPR025753	uncharacterized protein LOC101205613 [Cucumis sativus]	chr6	29052735	up2kb	29053003	up2kb	BNv1_06G19779	+	ATPase, AAA-type, core IPR025753	hypothetical protein POPTR_0007s13320g [Populus trichocarpa]
BN-HDR10038	chr6	27519557	up2kb	27519600	up2kb	CsaV3_6G046610.1	+	ATPase, AAA-type, core IPR025753	hypothetical protein CICLE_v10025528mg [Citrus clementina]	chr6	29052735	up2kb	29053003	up2kb	BNv1_06G19779	+	ATPase, AAA-type, core IPR025753	hypothetical protein POPTR_0007s13320g [Populus trichocarpa]
BN-HDR10038	chr6	27519557	up2kb	27519600	up2kb	CsaV3_6G046610.1	+	ATPase, AAA-type, core IPR025753	hypothetical protein CICLE_v10025528mg [Citrus clementina]	chr6	29052735	down2kb	29053003	-	BNv1_06G19778	+	ATPase, AAA-type, core IPR025753	uncharacterized protein LOC101205613 [Cucumis sativus]
BN-HDR10039	chr6	27522130	down2kb	27522471	down2kb	CsaV3_6G046610.1	+	ATPase, AAA-type, core IPR025753	hypothetical protein CICLE_v10025528mg [Citrus clementina]	chr6	29055542	intron3	29055747	intron4	BNv1_06G19779	+	ATPase, AAA-type, core IPR025753	hypothetical protein POPTR_0007s13320g [Populus trichocarpa]
BN-HDR10039	chr6	27522130	intron	27522471	down2kb	CsaV3_6G046620.1	-	ATPase, AAA-type, core IPR025753	hypothetical protein CICLE_v10025528mg [Citrus clementina]	chr6	29055542	intron3	29055747	intron4	BNv1_06G19779	+	ATPase, AAA-type, core IPR025753	hypothetical protein POPTR_0007s13320g [Populus trichocarpa]
BN-HDR10040	chr6	27549829	intron1	27549882	intron1	CsaV3_6G046670.1	+	Basic-leucine zipper domain	ocs element-binding factor 1-like [Cucumis sativus]	chr6	29083108	intron1	29083191	intron1	BNv1_06G19785	+	Basic-leucine zipper domain	ocs element-binding factor 1-like [Cucumis sativus]
BN-HDR10042	chr6	27590419	intron	27590533	up2kb	CsaV3_6G046760.1	+	D-galactoside/L-rhamnose binding SUEL lectin domain IPR031330	beta-galactosidase 3 [Cucumis sativus]	chr6	29123631	-	29123634	-	-	-		-
BN-HDR10046	chr6	27664684	up2kb	27664684	up2kb	CsaV3_6G046880.1	+	Cytochrome P450	cytochrome P450 84A1 [Cucumis sativus]	chr6	29197975	up2kb	29198370	up2kb	BNv1_06G19803	+	Cytochrome P450	cytochrome P450 84A1 [Cucumis sativus]
BN-HDR10052	chr6	27858938	up2kb	27859287	up2kb	CsaV3_6G047200.1	+	Thaumatin	Pathogenesis-related thaumatin superfamily protein [Theobroma cacao]	chr6	29392187	up2kb	29392530	up2kb	BNv1_06G19833	+	Thaumatin	Pathogenesis-related thaumatin superfamily protein [Theobroma cacao]
BN-HDR10056	chr6	27947772	intron1	27947912	intron1	CsaV3_6G047360.1	+	GDSL lipase/esterase	GDSL esterase/lipase EXL3-like [Cucumis sativus]	chr6	29479597	intron1	29479761	intron1	BNv1_06G19849	+	GDSL lipase/esterase	GDSL esterase/lipase EXL3-like [Cucumis sativus]
BN-HDR10057	chr6	27948362	intron2	27948663	intron2	CsaV3_6G047360.1	+	GDSL lipase/esterase	GDSL esterase/lipase EXL3-like [Cucumis sativus]	chr6	29480211	intron2	29480553	intron2	BNv1_06G19849	+	GDSL lipase/esterase	GDSL esterase/lipase EXL3-like [Cucumis sativus]
BN-HDR10058	chr6	27960830	up2kb	27960884	up2kb	CsaV3_6G047380.1	-	Pentatricopeptide repeat	pentatricopeptide repeat-containing protein At3g51320 [Cucumis sativus]	chr6	29492710	up2kb	29492798	up2kb	BNv1_06G19851	-	Pentatricopeptide repeat	pentatricopeptide repeat-containing protein At3g51320 [Cucumis sativus]
BN-HDR10058	chr6	27960830	up2kb	27960884	up2kb	CsaV3_6G047390.1	+	Uncharacterised protein family UPF0434/Trm112	protein preY, mitochondrial [Cucumis sativus]	chr6	29492710	up2kb	29492798	up2kb	BNv1_06G19852	+	Uncharacterised protein family UPF0434/Trm112	protein preY, mitochondrial [Cucumis sativus]
BN-HDR10058	chr6	27960830	down2kb	27960884	down2kb	CsaV3_6G047370.1	+		protein MID1-COMPLEMENTING ACTIVITY 1 isoform X1 [Cucumis sativus]	chr6	29492710	-	29492798	-	-	-		-
BN-HDR10060	chr6	27985427	up2kb	27985497	up2kb	CsaV3_6G047430.1	-	Haem peroxidase, plant/fungal/bacterial	peroxidase 64-like [Cucumis sativus]	chr6	29517312	-	29517314	-	-	-		-
BN-HDR10060	chr6	27985427	down2kb	27985497	down2kb	CsaV3_6G047440.1	-	Xylanase inhibitor, C-terminal IPR032861	aspartic proteinase-like protein 1 [Cucumis sativus]	chr6	29517312	-	29517314	-	-	-		-
BN-HDR10060	chr6	27985427	-	27985497	-	-	-		-	chr6	29517312	down2kb	29517314	down2kb	BNv1_06G19856	+	Lysine methyltransferase	methyltransferase-like protein 23 [Cucumis sativus]
BN-HDR10064	chr6	28157528	intron1	28157887	intron1	CsaV3_6G047830.1	-	Domain unknown function DUF295	putative F-box protein At5g60060 [Cucumis sativus]	chr6	29682449	intron1	29682528	intron1	BNv1_06G19897	-	Domain unknown function DUF295	putative F-box protein At5g60060 [Cucumis sativus]
BN-HDR10064	chr6	28157528	intron	28157887	up2kb	CsaV3_6G047840.1	+	Protein kinase domain	SRSF protein kinase 1-like [Cucumis sativus]	chr6	29682449	-	29682528	-	-	-		-
BN-HDR10065	chr6	28159330	up2kb	28159364	up2kb	CsaV3_6G047830.1	-	Domain unknown function DUF295	putative F-box protein At5g60060 [Cucumis sativus]	chr6	29683973	up2kb	29684270	up2kb	BNv1_06G19897	-	Domain unknown function DUF295	putative F-box protein At5g60060 [Cucumis sativus]
BN-HDR10065	chr6	28159330	up2kb	28159364	up2kb	CsaV3_6G047840.1	+	Protein kinase domain	SRSF protein kinase 1-like [Cucumis sativus]	chr6	29683973	up2kb	29684270	up2kb	BNv1_06G19898	+	Protein kinase domain	SRSF protein kinase 1-like [Cucumis sativus]
BN-HDR10066	chr6	28190309	up2kb	28190765	up2kb	CsaV3_6G047890.1	-	Protein kinase domain IPR010513	serine/threonine-protein kinase/endoribonuclease IRE1a-like isoform X1 [Cucumis sativus]	chr6	29715282	up2kb	29715679	up2kb	BNv1_06G19903	-	Protein kinase domain IPR010513	serine/threonine-protein kinase/endoribonuclease IRE1a-like isoform X1 [Cucumis sativus]
BN-HDR10067	chr6	28203831	up2kb	28203962	up2kb	CsaV3_6G047910.1	-	Major facilitator, sugar transporter-like	monosaccharide-sensing protein 2 [Vitis vinifera]	chr6	29728740	up2kb	29728912	up2kb	BNv1_06G19905	-	Major facilitator, sugar transporter-like	monosaccharide-sensing protein 2 [Vitis vinifera]
BN-HDR10067	chr6	28203831	down2kb	28203962	down2kb	CsaV3_6G047920.1	-	Leucine-rich repeat	plant intracellular Ras-group-related LRR protein 4 [Cucumis sativus]	chr6	29728740	down2kb	29728912	down2kb	BNv1_06G19906	-	Leucine-rich repeat	plant intracellular Ras-group-related LRR protein 4 [Cucumis sativus]
BN-HDR10070	chr6	28267916	down2kb	28267943	down2kb	CsaV3_6G048060.1	+		uncharacterized protein LOC102668673 isoform X1 [Glycine max]	chr6	29793271	down2kb	29793338	down2kb	BNv1_06G19920	+		uncharacterized protein LOC102668673 isoform X1 [Glycine max]
BN-HDR10070	chr6	28267916	down2kb	28267943	down2kb	CsaV3_6G048070.1	-	Small GTPase superfamily	ras-related protein RABB1c-like [Cucumis sativus]	chr6	29793271	down2kb	29793338	down2kb	BNv1_06G19921	-	Small GTPase superfamily	ras-related protein RABB1c-like [Cucumis sativus]
BN-HDR10073	chr6	28298428	up2kb	28299201	up2kb	CsaV3_6G048140.1	-		-	chr6	29823793	up2kb	29823942	up2kb	BNv1_06G19928	-		-
BN-HDR10073	chr6	28298428	up2kb	28299201	up2kb	CsaV3_6G048150.1	-		-	chr6	29823793	-	29823942	-	-	-		-
BN-HDR10074	chr6	28299626	up2kb	28299976	up2kb	CsaV3_6G048140.1	-		-	chr6	29824366	up2kb	29824643	up2kb	BNv1_06G19928	-		-
BN-HDR10074	chr6	28299626	up2kb	28299976	up2kb	CsaV3_6G048150.1	-		-	chr6	29824366	-	29824643	-	-	-		-
BN-HDR10076	chr6	28302907	up2kb	28303296	up2kb	CsaV3_6G048160.1	+	HAD-superfamily hydrolase, subfamily IIA	phosphoglycolate phosphatase 2 [Cucumis sativus]	chr6	29827505	up2kb	29827886	up2kb	BNv1_06G19929	+	HAD-superfamily hydrolase, subfamily IIA	phosphoglycolate phosphatase 2 [Cucumis sativus]
BN-HDR10078	chr6	28376946	down2kb	28377075	down2kb	CsaV3_6G048340.1	+		TPD1 protein homolog 1-like isoform X1 [Cucumis sativus]	chr6	29901782	down2kb	29902000	-	BNv1_06G19947	+		TPD1 protein homolog 1-like isoform X1 [Cucumis sativus]
BN-HDR10078	chr6	28376946	up2kb	28377075	up2kb	CsaV3_6G048350.1	-	Uncharacterised protein family Ycf33	uncharacterized protein LOC101208124 [Cucumis sativus]	chr6	29901782	up2kb	29902000	up2kb	BNv1_06G19948	-	Uncharacterised protein family Ycf33	uncharacterized protein LOC101208124 [Cucumis sativus]
BN-HDR10078	chr6	28376946	down2kb	28377075	down2kb	CsaV3_6G048360.1	-		uncharacterized protein LOC101763666 [Setaria italica]	chr6	29901782	down2kb	29902000	down2kb	BNv1_06G19949	-		uncharacterized protein LOC101763666 [Setaria italica]
BN-HDR10080	chr6	28384070	down2kb	28384337	down2kb	CsaV3_6G048370.1	-		-	chr6	29909010	-	29909268	-	-	-		-
BN-HDR10080	chr6	28384070	-	28384337	-	-	-		-	chr6	29909010	up2kb	29909268	up2kb	BNv1_06G19950	+		-
BN-HDR10083	chr6	28433018	up2kb	28433190	up2kb	CsaV3_6G048480.1	-		-	chr6	29957913	up2kb	29958035	up2kb	BNv1_06G19962	-		-
BN-HDR10086	chr6	28458827	up2kb	28458905	up2kb	CsaV3_6G048550.1	-	Ceramidase	alkaline ceramidase 3 [Cucumis sativus]	chr6	29983442	up2kb	29983539	up2kb	BNv1_06G19969	-	Ceramidase	alkaline ceramidase 3 [Cucumis sativus]
BN-HDR10086	chr6	28458827	up2kb	28458905	up2kb	CsaV3_6G048560.1	+	Protein of unknown function PDDEXK-like	uncharacterized protein LOC101205314 [Cucumis sativus]	chr6	29983442	up2kb	29983539	up2kb	BNv1_06G19970	+	Protein of unknown function PDDEXK-like	uncharacterized protein LOC101205314 [Cucumis sativus]
BN-HDR10089	chr6	28509810	up2kb	28509858	up2kb	CsaV3_6G048640.1	-		hypothetical protein Csa_6G512860 [Cucumis sativus]	chr6	30034373	up2kb	30034454	up2kb	BNv1_06G19978	-		hypothetical protein Csa_6G512860 [Cucumis sativus]
BN-HDR10089	chr6	28509810	-	28509858	-	-	-		-	chr6	30034373	down2kb	30034454	down2kb	BNv1_06G19979	+		-
BN-HDR10093	chr6	28556233	up2kb	28556299	up2kb	CsaV3_6G048730.1	+	ELK domain IPR005540	homeodomain protein Kn1 [Prunus dulcis]	chr6	30081058	up2kb	30081135	up2kb	BNv1_06G19986	+	ELK domain IPR005540	homeodomain protein Kn1 [Prunus dulcis]
BN-HDR10101	chr6	28766884	up2kb	28766893	up2kb	CsaV3_6G049180.1	-	Homeobox domain IPR002913	homeobox-leucine zipper protein PROTODERMAL FACTOR 2 [Cucumis sativus]	chr6	30293290	up2kb	30294101	up2kb	BNv1_06G20028	-	Homeobox domain IPR002913	homeobox-leucine zipper protein PROTODERMAL FACTOR 2 [Cucumis sativus]
BN-HDR10106	chr6	28828102	down2kb	28828190	down2kb	CsaV3_6G049310.1	+	Serine-threonine/tyrosine-protein kinase, catalytic domain IPR002902	hypothetical protein POPTR_0004s02560g [Populus trichocarpa]	chr6	30355230	down2kb	30355351	down2kb	BNv1_06G20041	+	Serine-threonine/tyrosine-protein kinase, catalytic domain IPR002902	hypothetical protein POPTR_0004s02560g [Populus trichocarpa]
BN-HDR10106	chr6	28828102	down2kb	28828190	down2kb	CsaV3_6G049310.1	+	Serine-threonine/tyrosine-protein kinase, catalytic domain IPR002902	hypothetical protein POPTR_0004s02560g [Populus trichocarpa]	chr6	30355230	up2kb	30355351	up2kb	BNv1_06G20042	+	Serine-threonine/tyrosine-protein kinase, catalytic domain IPR002902	hypothetical protein VITISV_019620 [Vitis vinifera]
BN-HDR10106	chr6	28828102	up2kb	28828190	up2kb	CsaV3_6G049320.1	+	Serine-threonine/tyrosine-protein kinase, catalytic domain IPR002902	hypothetical protein VITISV_019620 [Vitis vinifera]	chr6	30355230	up2kb	30355351	up2kb	BNv1_06G20042	+	Serine-threonine/tyrosine-protein kinase, catalytic domain IPR002902	hypothetical protein VITISV_019620 [Vitis vinifera]
BN-HDR10106	chr6	28828102	up2kb	28828190	up2kb	CsaV3_6G049320.1	+	Serine-threonine/tyrosine-protein kinase, catalytic domain IPR002902	hypothetical protein VITISV_019620 [Vitis vinifera]	chr6	30355230	down2kb	30355351	down2kb	BNv1_06G20041	+	Serine-threonine/tyrosine-protein kinase, catalytic domain IPR002902	hypothetical protein POPTR_0004s02560g [Populus trichocarpa]
BN-HDR10115	chr6	28938185	up2kb	28938254	up2kb	CsaV3_6G049580.1	-	PB1 domain	uncharacterized protein LOC101213084 [Cucumis sativus]	chr6	30466955	up2kb	30466972	up2kb	BNv1_06G20070	-	PB1 domain	uncharacterized protein LOC101213084 [Cucumis sativus]
BN-HDR10116	chr6	28947191	down2kb	28947668	down2kb	CsaV3_6G049600.1	+	Equilibrative nucleoside transporter	equilibrative nucleotide transporter 3-like [Solanum tuberosum]	chr6	30475894	down2kb	30475922	down2kb	BNv1_06G20071	+	Equilibrative nucleoside transporter	equilibrative nucleotide transporter 3-like [Solanum tuberosum]
BN-HDR10116	chr6	28947191	up2kb	28947668	up2kb	CsaV3_6G049610.1	+	JmjC domain IPR014977	lysine-specific demethylase JMJ25 [Cucumis sativus]	chr6	30475894	up2kb	30475922	up2kb	BNv1_06G20072	+	JmjC domain IPR014977	lysine-specific demethylase JMJ25 [Cucumis sativus]
BN-HDR10118	chr6	28971620	up2kb	28971872	intron	CsaV3_6G049630.1	-	SANT/Myb domain	myb-related protein 315-like [Cucumis sativus]	chr6	30499860	-	30500225	-	-	-		-
BN-HDR10118	chr6	28971620	down2kb	28971872	down2kb	CsaV3_6G049640.1	-	Inositol monophosphatase-like	putative PAP-specific phosphatase, mitochondrial isoform X1 [Cucumis sativus]	chr6	30499860	-	30500225	-	-	-		-
BN-HDR10131	chr6	29563523	down2kb	29563611	down2kb	CsaV3_6G050730.1	+	Thiamine pyrophosphate enzyme, C-terminal TPP-binding IPR012000	Pyruvate decarboxylase [Cucumis sativus]	chr6	31100457	down2kb	31100606	down2kb	BNv1_06G20177	+	Thiamine pyrophosphate enzyme, C-terminal TPP-binding IPR012000	Pyruvate decarboxylase [Cucumis sativus]
BN-HDR10131	chr6	29563523	up2kb	29563611	up2kb	CsaV3_6G050740.1	+	GDSL lipase/esterase	GDSL esterase/lipase At1g28570 [Cucumis sativus]	chr6	31100457	-	31100606	-	-	-		-
BN-HDR10132	chr6	29569962	up2kb	29572291	intron	CsaV3_6G050750.1	-	Pentatricopeptide repeat	pentatricopeptide repeat-containing protein At5g66520-like [Cucumis sativus]	chr6	31112618	up2kb	31112997	up2kb	BNv1_06G20180	-	Pentatricopeptide repeat IPR032867	pentatricopeptide repeat-containing protein At5g66520-like [Cucumis sativus]
BN-HDR10132	chr6	29569962	up2kb	29572291	intron2	CsaV3_6G050760.1	+	GDSL lipase/esterase	GDSL esterase/lipase At1g28570-like [Cucumis sativus]	chr6	31112618	up2kb	31112997	up2kb	BNv1_06G20181	+		GDSL esterase/lipase At1g28570-like [Cucumis sativus]
BN-HDR10133	chr6	29573940	down2kb	29574056	down2kb	CsaV3_6G050760.1	+	GDSL lipase/esterase	GDSL esterase/lipase At1g28570-like [Cucumis sativus]	chr6	31114634	down2kb	31114681	down2kb	BNv1_06G20181	+		GDSL esterase/lipase At1g28570-like [Cucumis sativus]
BN-HDR10133	chr6	29573940	down2kb	29574056	down2kb	CsaV3_6G050770.1	-		Uncharacterized protein TCM_029736 [Theobroma cacao]	chr6	31114634	down2kb	31114681	down2kb	BNv1_06G20182	-		Uncharacterized protein TCM_029736 [Theobroma cacao]
BN-HDR10134	chr6	29730328	-	29730416	-	-	-		-	chr6	31270957	up2kb	31270962	up2kb	BNv1_06G20210	-		-
BN-HDR10140	chr6	30028440	up2kb	30028456	up2kb	CsaV3_6G051630.1	+	MCM domain IPR027925	hypothetical protein PHAVU_002G194200g [Phaseolus vulgaris]	chr6	31568930	up2kb	31569036	up2kb	BNv1_06G20264	+	MCM domain IPR016040	DNA replication licensing factor MCM3 [Cicer arietinum]
BN-HDR10140	chr6	30028440	exon1	30028456	up2kb	CsaV3_6G051620.1	-	High mobility group box domain	high mobility group B protein 14 [Cucumis sativus]	chr6	31568930	-	31569036	-	-	-		-
BN-HDR10140	chr6	30028440	-	30028456	-	-	-		-	chr6	31568930	down2kb	31569036	down2kb	BNv1_06G20263	+	Uncharacterised protein family Ycf23	uncharacterized protein ycf23-like [Cucumis sativus]
BN-HDR10145	chr6	30117577	up2kb	30118094	up2kb	CsaV3_6G051780.1	-		uncharacterized protein LOC101212042 [Cucumis sativus]	chr6	31657929	up2kb	31658336	up2kb	BNv1_06G20278	-	VQ	uncharacterized protein LOC101212042 [Cucumis sativus]
BN-HDR10152	chr6	30242288	up2kb	30243144	up2kb	CsaV3_6G051970.1	+	Protein kinase domain IPR004041	CBL-interacting serine/threonine-protein kinase 23-like [Cucumis sativus]	chr6	31784006	-	31784953	up2kb	BNv1_06G20295	+	Protein kinase domain IPR004041	CBL-interacting serine/threonine-protein kinase 23-like [Cucumis sativus]
BN-HDR10153	chr6	30251789	intron2	30251854	intron2	CsaV3_6G051980.1	+	Polyprenyl synthetase	solanesyl diphosphate synthase 3, chloroplastic/mitochondrial [Cucumis sativus]	chr6	31793629	intron2	31793630	intron2	BNv1_06G20296	+	Polyprenyl synthetase	solanesyl diphosphate synthase 3, chloroplastic/mitochondrial [Cucumis sativus]
BN-HDR10154	chr6	30274769	up2kb	30275083	up2kb	CsaV3_6G052010.1	-	Pentatricopeptide repeat	pentatricopeptide repeat-containing protein At1g09900 [Cucumis sativus]	chr6	31816048	up2kb	31816268	up2kb	BNv1_06G20298	-	Pentatricopeptide repeat	pentatricopeptide repeat-containing protein At1g09900 [Cucumis sativus]
BN-HDR10154	chr6	30274769	up2kb	30275083	up2kb	CsaV3_6G052020.1	-		-	chr6	31816048	-	31816268	-	-	-		-
BN-HDR10154	chr6	30274769	-	30275083	-	-	-		-	chr6	31816048	down2kb	31816268	exon1	BNv1_06G20299	-		-
BN-HDR10155	chr6	30276106	up2kb	30276429	intron	CsaV3_6G052010.1	-	Pentatricopeptide repeat	pentatricopeptide repeat-containing protein At1g09900 [Cucumis sativus]	chr6	31817291	up2kb	31817704	-	BNv1_06G20298	-	Pentatricopeptide repeat	pentatricopeptide repeat-containing protein At1g09900 [Cucumis sativus]
BN-HDR10155	chr6	30276106	up2kb	30276429	intron	CsaV3_6G052020.1	-		-	chr6	31817291	-	31817704	-	-	-		-
BN-HDR10155	chr6	30276106	-	30276429	-	-	-		-	chr6	31817291	up2kb	31817704	up2kb	BNv1_06G20299	-		-
BN-HDR10157	chr6	30286718	up2kb	30286922	up2kb	CsaV3_6G052050.1	+	Remorin, C-terminal	uncharacterized protein LOC101217408 [Cucumis sativus]	chr6	31828027	-	31828235	up2kb	BNv1_06G20302	+	Remorin, C-terminal	uncharacterized protein LOC101217408 [Cucumis sativus]
BN-HDR10160	chr6	30368263	down2kb	30368406	down2kb	CsaV3_6G052180.1	+	Pentatricopeptide repeat IPR032867	pentatricopeptide repeat-containing protein At4g21065 [Cucumis sativus]	chr6	31909467	down2kb	31909623	down2kb	BNv1_06G20315	+	Pentatricopeptide repeat IPR032867	pentatricopeptide repeat-containing protein At4g21065 [Cucumis sativus]
BN-HDR10160	chr6	30368263	up2kb	30368406	up2kb	CsaV3_6G052190.1	+	BRCT domain	protein BREAST CANCER SUSCEPTIBILITY 1 homolog [Cucumis sativus]	chr6	31909467	up2kb	31909623	up2kb	BNv1_06G20316	+	BRCT domain	protein BREAST CANCER SUSCEPTIBILITY 1 homolog [Cucumis sativus]
BN-HDR10162	chr6	30375874	down2kb	30376570	down2kb	CsaV3_6G052190.1	+	BRCT domain	protein BREAST CANCER SUSCEPTIBILITY 1 homolog [Cucumis sativus]	chr6	31917126	down2kb	31917615	down2kb	BNv1_06G20316	+	BRCT domain	protein BREAST CANCER SUSCEPTIBILITY 1 homolog [Cucumis sativus]
BN-HDR10162	chr6	30375874	up2kb	30376570	up2kb	CsaV3_6G052200.1	+	Protein prenyltransferase, alpha subunit	uncharacterized protein LOC101216457 [Cucumis sativus]	chr6	31917126	up2kb	31917615	up2kb	BNv1_06G20317	+	Protein prenyltransferase, alpha subunit IPR025875	uncharacterized protein LOC101216457 [Cucumis sativus]
BN-HDR10163	chr6	30383258	down2kb	30383332	down2kb	CsaV3_6G052200.1	+	Protein prenyltransferase, alpha subunit	uncharacterized protein LOC101216457 [Cucumis sativus]	chr6	31924347	down2kb	31924352	down2kb	BNv1_06G20317	+	Protein prenyltransferase, alpha subunit IPR025875	uncharacterized protein LOC101216457 [Cucumis sativus]
BN-HDR10163	chr6	30383258	exon1	30383332	exon1	CsaV3_6G052210.1	+	Photosystem I PsaG/PsaK protein	photosystem I reaction center subunit psaK, chloroplastic [Cucumis sativus]	chr6	31924347	up2kb	31924352	up2kb	BNv1_06G20318	+	Photosystem I PsaG/PsaK protein	photosystem I reaction center subunit psaK, chloroplastic [Cucumis sativus]
BN-HDR10166	chr6	30502777	up2kb	30502779	up2kb	CsaV3_6G052290.1	-	SIT4 phosphatase-associated protein family	serine/threonine-protein phosphatase 6 regulatory subunit 2 [Cucumis sativus]	chr6	32043742	up2kb	32043807	up2kb	BNv1_06G20324	-	SIT4 phosphatase-associated protein family	serine/threonine-protein phosphatase 6 regulatory subunit 2 [Cucumis sativus]
BN-HDR10166	chr6	30502777	up2kb	30502779	up2kb	CsaV3_6G052300.1	+	G-patch domain	DNA-damage-repair/toleration protein DRT111, chloroplastic [Cucumis sativus]	chr6	32043742	-	32043807	-	-	-		-
BN-HDR10168	chr6	30555922	intron10	30557090	intron10	CsaV3_6G052370.1	+	AMP-dependent synthetase/ligase	2-succinylbenzoate--CoA ligase, chloroplastic/peroxisomal isoform X2 [Cucumis sativus]	chr6	32096790	intron11	32096963	intron11	BNv1_06G20331	+	AMP-dependent synthetase/ligase IPR025110	2-succinylbenzoate--CoA ligase, chloroplastic/peroxisomal isoform X2 [Cucumis sativus]
BN-HDR10169	chr6	30559880	down2kb	30560015	down2kb	CsaV3_6G052370.1	+	AMP-dependent synthetase/ligase	2-succinylbenzoate--CoA ligase, chloroplastic/peroxisomal isoform X2 [Cucumis sativus]	chr6	32099773	down2kb	32100003	down2kb	BNv1_06G20331	+	AMP-dependent synthetase/ligase IPR025110	2-succinylbenzoate--CoA ligase, chloroplastic/peroxisomal isoform X2 [Cucumis sativus]
BN-HDR10169	chr6	30559880	down2kb	30560015	down2kb	CsaV3_6G052380.1	-	Serine aminopeptidase, S33	hypothetical protein VITISV_009388 [Vitis vinifera]	chr6	32099773	down2kb	32100003	down2kb	BNv1_06G20332	-	Serine aminopeptidase, S33	hypothetical protein VITISV_009388 [Vitis vinifera]
BN-HDR10171	chr6	30581507	up2kb	30581565	up2kb	CsaV3_6G052400.1	-	PPM-type phosphatase domain	probable protein phosphatase 2C 28-like isoform X1 [Glycine max]	chr6	32121381	up2kb	32121437	up2kb	BNv1_06G20335	-	PPM-type phosphatase domain	probable protein phosphatase 2C 28-like isoform X1 [Glycine max]
BN-HDR10171	chr6	30581507	down2kb	30581565	down2kb	CsaV3_6G052420.1	-	Cupin 1	putative germin-like protein 2-1 [Cucumis sativus]	chr6	32121381	down2kb	32121437	down2kb	BNv1_06G20336	-	Cupin 1	putative germin-like protein 2-1 [Cucumis sativus]
BN-HDR10175	chr6	30799671	down2kb	30799733	down2kb	CsaV3_6G052820.1	-	Heavy metal-associated domain, HMA IPR008250	copper-transporting ATPase RAN1 [Cucumis sativus]	chr6	32340240	down2kb	32340278	down2kb	BNv1_06G20375	-	Heavy metal-associated domain, HMA IPR008250	copper-transporting ATPase RAN1 [Cucumis sativus]
BN-INS10016	chr6	26727468	intron2	26727469	intron2	CsaV3_6G045150.1	-	GRAM domain	putative GEM-like protein 3 [Cucumis sativus]	chr6	28215599	intron2	28215668	intron2	BNv1_06G19642	-	GRAM domain	putative GEM-like protein 3 [Cucumis sativus]
BN-INS10023	chr6	27117032	intron3	27117033	intron3	CsaV3_6G045790.1	-	Gamma-glutamyltranspeptidase	gamma-glutamyltranspeptidase 1 [Cucumis sativus]	chr6	28648937	intron3	28649034	intron3	BNv1_06G19702	-	Gamma-glutamyltranspeptidase	gamma-glutamyltranspeptidase 1 [Cucumis sativus]
BN-INS10027	chr6	27163360	exon1	27163364	exon1	CsaV3_6G045910.1	+	Cytochrome P450	cytochrome P450 CYP736A12-like [Cucumis sativus]	chr6	28695591	intron1	28696111	intron1	BNv1_06G19713	+	Cytochrome P450	cytochrome P450 CYP736A12-like [Cucumis sativus]
BN-INS10032	chr6	27220967	up2kb	27220968	up2kb	CsaV3_6G045990.1	+		UDP-glycosyltransferase 72E1-like [Glycine max]	chr6	28753298	up2kb	28753349	up2kb	BNv1_06G19722	+	UDP-glucuronosyl/UDP-glucosyltransferase	UDP-glycosyltransferase 72E1-like [Glycine max]
BN-INS10036	chr6	27289204	up2kb	27289206	up2kb	CsaV3_6G046120.1	+	Major facilitator, sugar transporter-like	Major facilitator superfamily protein [Theobroma cacao]	chr6	28821488	-	28822351	-	-	-		-
BN-INS10061	chr6	28109754	intron2	28109754	intron2	CsaV3_6G047720.1	-	Glycoside hydrolase, family 19, catalytic IPR001002	endochitinase-like [Cucumis sativus]	chr6	29641548	down2kb	29641607	down2kb	BNv1_06G19885	-	Glycoside hydrolase, family 19, catalytic IPR001002	endochitinase-like [Cucumis sativus]
BN-INS10061	chr6	28109754	intron2	28109754	intron2	CsaV3_6G047720.1	-	Glycoside hydrolase, family 19, catalytic IPR001002	endochitinase-like [Cucumis sativus]	chr6	29641548	up2kb	29641607	up2kb	BNv1_06G19884	-	Glycoside hydrolase, family 19, catalytic IPR001002	endochitinase-like [Cucumis sativus]
BN-INS10063	chr6	28154293	up2kb	28154293	up2kb	CsaV3_6G047820.1	+		hypothetical protein PHAVU_002G115500g [Phaseolus vulgaris]	chr6	29679134	up2kb	29679217	up2kb	BNv1_06G19896	+		hypothetical protein PHAVU_002G115500g [Phaseolus vulgaris]
BN-INS10063	chr6	28154293	down2kb	28154293	down2kb	CsaV3_6G047830.1	-	Domain unknown function DUF295	putative F-box protein At5g60060 [Cucumis sativus]	chr6	29679134	down2kb	29679217	down2kb	BNv1_06G19897	-	Domain unknown function DUF295	putative F-box protein At5g60060 [Cucumis sativus]
BN-INS10069	chr6	28265918	up2kb	28265921	up2kb	CsaV3_6G048050.1	-	Glycosyl transferase, family 8	probable galacturonosyltransferase 4 [Cucumis sativus]	chr6	29791088	up2kb	29791247	up2kb	BNv1_06G19919	-	Glycosyl transferase, family 8	probable galacturonosyltransferase 4 [Cucumis sativus]
BN-INS10069	chr6	28265918	up2kb	28265921	up2kb	CsaV3_6G048060.1	+		uncharacterized protein LOC102668673 isoform X1 [Glycine max]	chr6	29791088	up2kb	29791247	up2kb	BNv1_06G19920	+		uncharacterized protein LOC102668673 isoform X1 [Glycine max]
BN-INS10077	chr6	28365673	up2kb	28365674	up2kb	CsaV3_6G048290.1	-	Microtubule-associated protein 70	hypothetical protein PRUPE_ppa002850mg [Prunus persica]	chr6	29890293	up2kb	29890419	up2kb	BNv1_06G19944	-	Microtubule-associated protein 70	hypothetical protein POPTR_0016s00870g [Populus trichocarpa]
BN-INS10107	chr6	28830043	intron1	28830046	intron1	CsaV3_6G049320.1	+	Serine-threonine/tyrosine-protein kinase, catalytic domain IPR002902	hypothetical protein VITISV_019620 [Vitis vinifera]	chr6	30357210	intron1	30357281	intron1	BNv1_06G20042	+	Serine-threonine/tyrosine-protein kinase, catalytic domain IPR002902	hypothetical protein VITISV_019620 [Vitis vinifera]
BN-INS10108	chr6	28837723	intron2	28837723	intron2	CsaV3_6G049330.1	+	Gnk2-homologous domain	hypothetical protein POPTR_0011s03270g [Populus trichocarpa]	chr6	30364945	down2kb	30366501	-	BNv1_06G20043	+	Protein kinase domain IPR002902	hypothetical protein POPTR_0011s03270g [Populus trichocarpa]
BN-INS10108	chr6	28837723	intron2	28837723	intron2	CsaV3_6G049330.1	+	Gnk2-homologous domain	hypothetical protein POPTR_0011s03270g [Populus trichocarpa]	chr6	30364945	-	30366501	up2kb	BNv1_06G20044	+	Gnk2-homologous domain	cysteine-rich receptor-like protein kinase 25-like isoform 1 [Glycine max]
BN-INS10108	chr6	28837723	up2kb	28837723	up2kb	CsaV3_6G049340.1	+	Gnk2-homologous domain	hypothetical protein POPTR_0011s03270g [Populus trichocarpa]	chr6	30364945	-	30366501	up2kb	BNv1_06G20044	+	Gnk2-homologous domain	cysteine-rich receptor-like protein kinase 25-like isoform 1 [Glycine max]
BN-INS10108	chr6	28837723	up2kb	28837723	up2kb	CsaV3_6G049340.1	+	Gnk2-homologous domain	hypothetical protein POPTR_0011s03270g [Populus trichocarpa]	chr6	30364945	down2kb	30366501	-	BNv1_06G20043	+	Protein kinase domain IPR002902	hypothetical protein POPTR_0011s03270g [Populus trichocarpa]
BN-INS10109	chr6	28838356	down2kb	28838356	down2kb	CsaV3_6G049330.1	+	Gnk2-homologous domain	hypothetical protein POPTR_0011s03270g [Populus trichocarpa]	chr6	30367142	up2kb	30367198	up2kb	BNv1_06G20044	+	Gnk2-homologous domain	cysteine-rich receptor-like protein kinase 25-like isoform 1 [Glycine max]
BN-INS10109	chr6	28838356	up2kb	28838356	up2kb	CsaV3_6G049340.1	+	Gnk2-homologous domain	hypothetical protein POPTR_0011s03270g [Populus trichocarpa]	chr6	30367142	up2kb	30367198	up2kb	BNv1_06G20044	+	Gnk2-homologous domain	cysteine-rich receptor-like protein kinase 25-like isoform 1 [Glycine max]
BN-INS10122	chr6	29061749	up2kb	29061749	up2kb	CsaV3_6G049830.1	-		pre-mRNA-splicing factor SYF1-like [Glycine max]	chr6	30589704	up2kb	30589753	up2kb	BNv1_06G20091	-		pre-mRNA-splicing factor SYF1-like [Glycine max]
BN-INS10122	chr6	29061749	up2kb	29061749	up2kb	CsaV3_6G049840.1	+	Vacuolar protein sorting-associated, VPS28	vacuolar protein sorting-associated protein 28 homolog 2 [Cucumis sativus]	chr6	30589704	up2kb	30589753	up2kb	BNv1_06G20092	+	Vacuolar protein sorting-associated, VPS28	vacuolar protein sorting-associated protein 28 homolog 2 [Cucumis sativus]
BN-INS10123	chr6	29304680	-	29304681	-	-	-		-	chr6	30841642	down2kb	30841694	down2kb	BNv1_06G20130	-		-
BN-INS10138	chr6	29947481	down2kb	29947484	down2kb	CsaV3_6G051470.1	+	PDCD5-related protein	hypothetical protein Csa_6G522140 [Cucumis sativus]	chr6	31487844	down2kb	31488058	down2kb	BNv1_06G20249	+	PDCD5-related protein	hypothetical protein Csa_6G522140 [Cucumis sativus]
BN-INS10138	chr6	29947481	up2kb	29947484	up2kb	CsaV3_6G051480.1	+	Potassium channel domain	two-pore potassium channel 3 [Cucumis sativus]	chr6	31487844	-	31488058	up2kb	BNv1_06G20250	+	Potassium channel domain	two-pore potassium channel 3 [Cucumis sativus]
BN-INS10144	chr6	30117316	up2kb	30117316	up2kb	CsaV3_6G051780.1	-		uncharacterized protein LOC101212042 [Cucumis sativus]	chr6	31657615	up2kb	31657666	up2kb	BNv1_06G20278	-	VQ	uncharacterized protein LOC101212042 [Cucumis sativus]
BN-INS10150	chr6	30226502	down2kb	30226502	down2kb	CsaV3_6G051930.1	+	WD40 repeat	p21-activated protein kinase-interacting protein 1-like [Cucumis sativus]	chr6	31768105	intron2	31768165	intron2	BNv1_06G20293	+	WD40 repeat IPR005045	putative ALA-interacting subunit 2 [Cucumis sativus]
BN-INS10150	chr6	30226502	up2kb	30226502	up2kb	CsaV3_6G051940.1	+	CDC50/LEM3 family	putative ALA-interacting subunit 2 [Cucumis sativus]	chr6	31768105	intron2	31768165	intron2	BNv1_06G20293	+	WD40 repeat IPR005045	putative ALA-interacting subunit 2 [Cucumis sativus]
BN-INS10165	chr6	30414401	intron15	30414403	intron15	CsaV3_6G052230.1	+	ABC transporter-like IPR011527	Multidrug resistance-associated protein 2 isoform 1 [Theobroma cacao]	chr6	31955301	intron14	31955361	intron14	BNv1_06G20320	+	ABC transporter-like IPR011527	Multidrug resistance-associated protein 2 isoform 1 [Theobroma cacao]
BN-INVDP5571	chr1	19178382	-	19179808	-	-	-		-	chr6	30731443	down2kb	30732866	-	BNv1_06G20114	+	Transposase, MuDR, plant IPR018289	uncharacterized protein LOC102620129 [Citrus sinensis]
BN-INVDP6892	chr3	36695216	-	36699043	-	-	-		-	chr6	30727002	up2kb	30730813	-	BNv1_06G20113	-		uncharacterized protein LOC101206260 isoform X1 [Cucumis sativus]
BN-INVDP6892	chr3	36695216	-	36699043	-	-	-		-	chr6	30727002	up2kb	30730813	down2kb	BNv1_06G20114	+	Transposase, MuDR, plant IPR018289	uncharacterized protein LOC102620129 [Citrus sinensis]
BN-INVDP7690	chr5	10069606	-	10071521	-	-	-		-	chr6	30241730	-	30243628	down2kb	BNv1_06G20019	-		probable cyclin-dependent serine/threonine-protein kinase DDB_G0278487 isoform X2 [Cucumis sativus]
BN-INVDP9044	chr6	30261787	exon1	30261997	exon1	CsaV3_6G051990.1	-		uncharacterized protein LOC101213807 [Cucumis sativus]	chr7	7291830	-	7292040	-	-	-		-
BN-INVDP9046	chr6	30724411	intron	30725230	up2kb	CsaV3_6G052720.1	+	Patatin-like phospholipase domain	patatin-like protein 3 [Cucumis sativus]	chr2	15824153	-	15824961	-	-	-		-
BN-INVDP9047	chr6	30869375	up2kb	30869644	up2kb	CsaV3_6G052880.1	-	SNF2-related, N-terminal domain IPR001650	chromatin remodeling complex subunit [Cucumis melo subsp. melo]	chr3	1813177	-	1813446	-	-	-		-
BN-INVDP9047	chr6	30869375	-	30869644	-	-	-		-	chr3	1813177	intron1	1813446	intron1	BNv1_03G06658	-		-
BN-NOTAL3261	-	-	-	-	-	-	-		-	chr6	27606724	-	27611140	down2kb	BNv1_06G19555	-	TIP49, C-terminal	ruvB-like 2 [Cucumis sativus]
BN-NOTAL3262	-	-	-	-	-	-	-		-	chr6	28438383	up2kb	28438547	up2kb	BNv1_06G19663	-	Mitochondrial substrate/solute carrier	probable mitochondrial adenine nucleotide transporter BTL3 [Cucumis sativus]
BN-NOTAL3264	-	-	-	-	-	-	-		-	chr6	30730814	down2kb	30731060	down2kb	BNv1_06G20114	+	Transposase, MuDR, plant IPR018289	uncharacterized protein LOC102620129 [Citrus sinensis]
BN-NOTAL3266	-	-	-	-	-	-	-		-	chr6	31101348	down2kb	31103660	-	BNv1_06G20177	+	Thiamine pyrophosphate enzyme, C-terminal TPP-binding IPR012000	Pyruvate decarboxylase [Cucumis sativus]
BN-NOTAL3266	-	-	-	-	-	-	-		-	chr6	31101348	-	31103660	exon1	BNv1_06G20178	+	GDSL lipase/esterase	GDSL esterase/lipase At1g28570 [Cucumis sativus]
BN-NOTAL3267	-	-	-	-	-	-	-		-	chr6	31105129	down2kb	31107883	-	BNv1_06G20178	+	GDSL lipase/esterase	GDSL esterase/lipase At1g28570 [Cucumis sativus]
BN-NOTAL3267	-	-	-	-	-	-	-		-	chr6	31105129	-	31107883	up2kb	BNv1_06G20179	+	GDSL lipase/esterase	GDSL esterase/lipase At1g28570 [Cucumis sativus]
BN-NOTAL3268	-	-	-	-	-	-	-		-	chr6	31706388	intron17	31706633	intron17	BNv1_06G20284	-		P-loop containing nucleoside triphosphate hydrolases superfamily protein isoform 1 [Theobroma cacao]
BN-NOTAL922	chr6	26041423	up2kb	26041970	up2kb	CsaV3_6G044090.1	-	Cyclophilin-type peptidyl-prolyl cis-trans isomerase domain IPR003613	Plant U-box 49 isoform 3 [Theobroma cacao]	-	-	-	-	-	-	-		-
BN-NOTAL922	chr6	26041423	down2kb	26041970	down2kb	CsaV3_6G044100.1	-		adenylyl-sulfate kinase 3-like [Cucumis sativus]	-	-	-	-	-	-	-		-
BN-NOTAL923	chr6	28117397	down2kb	28118489	down2kb	CsaV3_6G047730.1	-	Glycoside hydrolase, family 19, catalytic	endochitinase-like [Cucumis sativus]	-	-	-	-	-	-	-		-
BN-NOTAL924	chr6	28120454	exon1	28123805	intron	CsaV3_6G047730.1	-	Glycoside hydrolase, family 19, catalytic	endochitinase-like [Cucumis sativus]	-	-	-	-	-	-	-		-
BN-NOTAL924	chr6	28120454	intron	28123805	up2kb	CsaV3_6G047740.1	+	Glycoside hydrolase, family 19, catalytic	endochitinase-like [Cucumis sativus]	-	-	-	-	-	-	-		-
BN-NOTAL925	chr6	29564341	down2kb	29565227	intron	CsaV3_6G050730.1	+	Thiamine pyrophosphate enzyme, C-terminal TPP-binding IPR012000	Pyruvate decarboxylase [Cucumis sativus]	-	-	-	-	-	-	-		-
BN-NOTAL925	chr6	29564341	up2kb	29565227	up2kb	CsaV3_6G050740.1	+	GDSL lipase/esterase	GDSL esterase/lipase At1g28570 [Cucumis sativus]	-	-	-	-	-	-	-		-
BN-NOTAL926	chr6	30164743	intron18	30164950	intron18	CsaV3_6G051830.1	-		P-loop containing nucleoside triphosphate hydrolases superfamily protein isoform 1 [Theobroma cacao]	-	-	-	-	-	-	-		-
BN-TDM10007	chr6	26081075	intron4	26081253	intron4	CsaV3_6G044170.1	-	SANT/Myb domain IPR005818	telomere repeat-binding factor 2 isoform X1 [Cucumis sativus]	chr6	27564331	intron3	27564455	intron3	BNv1_06G19548	-	SANT/Myb domain IPR005818	telomere repeat-binding factor 2 isoform X1 [Cucumis sativus]
BN-TDM10012	chr6	26342530	exon1	26342600	exon1	CsaV3_6G044530.1	-	Serine-threonine/tyrosine-protein kinase, catalytic domain IPR001611	Receptor-like protein kinase 3 [Cucumis sativus]	chr6	27830806	up2kb	27830853	up2kb	BNv1_06G19585	-	Serine-threonine/tyrosine-protein kinase, catalytic domain IPR001611	Receptor-like protein kinase 3 [Cucumis sativus]
BN-TDM10034	chr6	27267915	down2kb	27268284	down2kb	CsaV3_6G046080.1	+	Basic-leucine zipper domain IPR012900	hypothetical protein CICLE_v10025963mg [Citrus clementina]	chr6	28800279	down2kb	28800696	down2kb	BNv1_06G19729	+	Basic-leucine zipper domain IPR012900	hypothetical protein POPTR_0005s12750g [Populus trichocarpa]
BN-TDM10034	chr6	27267915	intron6	27268284	intron6	CsaV3_6G046090.1	-	TB2/DP1/HVA22-related protein	HVA22-like protein k isoform X1 [Cucumis sativus]	chr6	28800279	intron11	28800696	intron9	BNv1_06G19730	-	TB2/DP1/HVA22-related protein	HVA22-like protein k isoform X1 [Cucumis sativus]
BN-TDM10054	chr6	27882153	intron	27888496	exon9	CsaV3_6G047250.1	-	SAM-dependent methyltransferase RsmB/NOP2-type	uncharacterized protein LOC101221513 [Cucumis sativus]	chr6	29415250	-	29420350	down2kb	BNv1_06G19837	-	SAM-dependent methyltransferase RsmB/NOP2-type	uncharacterized protein LOC101221513 [Cucumis sativus]
BN-TDM10055	chr6	27921506	down2kb	27921593	down2kb	CsaV3_6G047300.1	+		uncharacterized protein LOC101220806 [Cucumis sativus]	chr6	29453333	down2kb	29453391	down2kb	BNv1_06G19842	+		uncharacterized protein LOC101220806 [Cucumis sativus]
BN-TDM10055	chr6	27921506	up2kb	27921593	up2kb	CsaV3_6G047310.1	+	Tetratricopeptide repeat 1	protein POLLENLESS 3-LIKE 2 isoform X1 [Cucumis sativus]	chr6	29453333	up2kb	29453391	up2kb	BNv1_06G19843	+	Tetratricopeptide repeat 1	protein POLLENLESS 3-LIKE 2 isoform X1 [Cucumis sativus]
BN-TDM10059	chr6	27979695	exon2	27979761	exon2	CsaV3_6G047420.1	-	RNA-binding protein Lupus La	la-related protein 1C [Cucumis sativus]	chr6	29511564	up2kb	29511664	up2kb	BNv1_06G19855	-	RNA-binding protein Lupus La	la-related protein 1C [Cucumis sativus]
BN-TDM10059	chr6	27979695	up2kb	27979761	up2kb	CsaV3_6G047410.1	+	Lysine methyltransferase	methyltransferase-like protein 23 [Cucumis sativus]	chr6	29511564	up2kb	29511664	up2kb	BNv1_06G19856	+	Lysine methyltransferase	methyltransferase-like protein 23 [Cucumis sativus]
BN-TDM10126	chr6	29412314	intron1	29412340	intron1	CsaV3_6G050440.1	+	Protein kinase domain	serine/threonine-protein kinase CDL1 [Cucumis sativus]	chr6	30948993	intron1	30949042	intron1	BNv1_06G20151	+	Protein kinase domain	serine/threonine-protein kinase CDL1 [Cucumis sativus]
BN-TDM10126	chr6	29412314	up2kb	29412340	up2kb	CsaV3_6G050450.1	+	NAC domain	NAC domain-containing protein 8 [Glycine soja]	chr6	30948993	up2kb	30949042	up2kb	BNv1_06G20152	+	NAC domain	NAC domain-containing protein 8 [Glycine soja]
BN-TDM10159	chr6	30336977	intron3	30337028	intron3	CsaV3_6G052110.1	+	Calcium-dependent channel, 7TM region, putative phosphate IPR027815	CSC1-like protein ERD4 [Cucumis sativus]	chr6	31878183	intron3	31878211	intron3	BNv1_06G20308	+	Calcium-dependent channel, 7TM region, putative phosphate IPR027815	CSC1-like protein ERD4 [Cucumis sativus]
BN-TDM10176	chr6	30830145	down2kb	30830176	down2kb	CsaV3_6G052850.1	-	Protein of unknown function DUF597	zinc-binding protein [Cucumis melo subsp. melo]	chr6	32370695	down2kb	32370749	down2kb	BNv1_06G20378	-	Protein of unknown function DUF597	zinc-binding protein [Cucumis melo subsp. melo]

## Sheet: Table S8
Table S8 Lipids detected by LC-MS
Lipid Name	Lipid Type	MS mode	MS Transition	RT (min)	CL1	CL2	CL3	XIS49-1	XIS49-2	XIS49-3	FC (E1/E2)	P.value
FFA(20:3)	FFA	neg	305.2/305.2	1.26	1.61626e+06	1.64899e+06	1.5483e+06	2.02251e+06	2.13349e+06	2.24855e+06	0.751582	0.00177986
FFA(24:1)	FFA	neg	365.3/365.3	1.26	803198	856028	762463	978133	981923	946444	0.833198	0.00529239
FFA(18:2)	FFA	neg	279.2/279.2	1.15	3.55446e+07	3.70382e+07	3.74079e+07	3.94431e+07	4.18038e+07	4.35035e+07	0.881686	0.0197429
FFA(18:0)	FFA	neg	283.2/283.2	1.13	1.63813e+07	1.83863e+07	1.69861e+07	1.42793e+07	1.42533e+07	1.53194e+07	1.18019	0.0188057
FFA(22:6)	FFA	neg	327.2/327.2	1.25	1.0496e+06	1.38917e+06	1.67377e+06	276427	709088	560419	2.66023	0.0178644
FFA(24:3)	FFA	neg	361.3/361.3	1.41	82119.7	89644.4	97704.9	29078.1	23731.9	40089.9	2.90064	0.00086954
TAG47:0-FA16:0	GL-TAG	pos	810.7/537.4	0.68	263720	248555	278089	358348	348361	334182	0.759315	0.0016366
TAG52:0-FA18:0	GL-TAG	pos	880.8/579.5	0.98	224255	249933	185017	108836	98421	98473	2.15617	0.00356762
TAG54:0-FA18:0	GL-TAG	pos	908.8/607.5	1.05	175809	173303	176115	125579	127718	113863	1.43051	0.000278046
TAG46:0-FA16:0	GL-TAG	pos	796.7/523.5	0.93	104980	98797.6	132005	63166.1	76716.6	60880.2	1.67253	0.0165108
TAG50:0-FA18:0	GL-TAG	pos	852.8/551.5	0.9	97643.8	101197	124342	49132.1	41023.8	76183.1	1.94292	0.0180816
TAG50:0-FA16:0	GL-TAG	pos	852.8/579.5	0.89	36829.5	52612.2	51072.3	20095.1	25046.6	28984.4	1.89561	0.0172343
TAG51:0-FA16:0	GL-TAG	pos	866.8/593.5	0.91	35998.8	46038.7	51071	92090.6	106322	110509	0.43088	0.00118818
TAG49:0-FA17:0	GL-TAG	pos	838.8/551.5	1.05	44240.6	41846.9	42695.9	30138	39351.7	35165.1	1.23055	0.0432294
TAG49:1-FA16:0	GL-TAG	pos	836.8/563.5	0.72	3.4164e+06	3.54346e+06	3.61082e+06	3.86657e+06	3.87928e+06	3.75348e+06	0.919244	0.0112828
TAG50:1-FA16:0	GL-TAG	pos	850.8/577.5	0.87	586482	568385	734944	211153	193144	182117	3.22265	0.00124486
TAG51:1-FA18:0	GL-TAG	pos	864.8/563.5	0.71	385954	344093	426977	522407	548376	520746	0.726989	0.00477279
TAG48:1-FA16:0	GL-TAG	pos	822.7/549.4	0.87	155314	170430	151180	75507.5	80019.4	84886.8	1.98377	0.000256789
TAG52:1-FA18:0	GL-TAG	pos	878.8/577.5	0.88	136284	122726	123706	32954.1	49898.6	52355.6	2.83057	0.000388182
TAG54:1-FA20:0	GL-TAG	pos	906.8/577.5	0.95	71166.1	73675.3	61940.1	30142.9	34331.3	51068.9	1.78965	0.0142113
DAG(16:0/16:1)	GL-DAG	pos	584.4/313.2	0.96	17583.2	20087	24274.7	43525.6	43976.1	29296.9	0.530357	0.0245328
TAG(46:1-FA14:0)	GL-TAG	pos	794.7/549.5	0.93	16737.7	22603.9	20931.6	4165.89	11723.3	8376.46	2.4839	0.0127374
DAG(18:0/18:2)	GL-DAG	pos	638.4/341.3	0.9	198406	201752	206535	139068	154770	172431	1.30117	0.00918421
TAG49:2-FA16:0	GL-TAG	pos	834.8/561.5	0.73	1.59229e+07	1.6091e+07	1.57527e+07	1.75629e+07	1.79557e+07	1.65012e+07	0.918238	0.0334101
TAG50:2-FA16:0	GL-TAG	pos	848.8/575.5	0.86	2.23111e+06	2.08517e+06	2.07053e+06	586060	632954	589000	3.5325	8.95669e-06
TAG46:1-FA16:1	GL-TAG	pos	794.7/523.5	1.02	1.38728e+06	1.34614e+06	1.34864e+06	1.47705e+06	1.4354e+06	1.51042e+06	0.922946	0.0111446
TAG52:2-FA18:0	GL-TAG	pos	876.8/575.5	0.86	362520	419460	403537	102139	116380	110518	3.60298	8.18301e-05
TAG52:2-FA16:0	GL-TAG	pos	876.8/603.5	0.94	212068	227766	266490	89725.1	62407	58565.5	3.35231	0.000946643
TAG50:1-FA18:1	GL-TAG	pos	850.8/551.5	0.87	252408	222818	224454	70530	68356.6	62570.4	3.4731	7.37573e-05
TAG54:2-FA20:0	GL-TAG	pos	904.8/575.5	0.88	168158	215161	225212	80372.1	112930	124629	1.91403	0.0116848
TAG54:2-FA18:0	GL-TAG	pos	904.8/603.5	0.87	138856	138979	121335	46832.2	31856.6	53039.1	3.03026	0.00048784
TAG48:1-FA16:1	GL-TAG	pos	822.7/551.4	1.01	122051	142574	118825	88724.8	92911.7	65066.4	1.5543	0.0162536
TAG52:1-FA18:1	GL-TAG	pos	878.8/579.5	0.88	114824	134614	120150	41864.2	38431.9	45265.7	2.94347	0.000198982
TAG48:2-FA16:0	GL-TAG	pos	820.7/547.4	0.81	107993	118118	112188	48552.1	58470.9	63628.4	1.9824	0.000461059
TAG56:2-FA20:0	GL-TAG	pos	932.9/603.6	1.03	62794.8	67817.6	72836.1	24282.3	29034.9	38505.9	2.21566	0.00185884
TAG44:1-FA16:1	GL-TAG	pos	766.7/495.4	1	50015.1	40610.6	51785.9	35733.3	35158.3	25112.6	1.48339	0.0340837
TAG50:1-FA16:1	GL-TAG	pos	850.8/579.5	0.97	22581.1	24250.3	39299.6	9209.95	6700.39	7535.12	3.67368	0.0176465
TAG50:2-FA18:0	GL-TAG	pos	848.8/547.5	0.77	35163.9	28466.7	21762.8	13395	16743	15904.9	1.85465	0.0304573
TAG46:2-FA16:1	GL-TAG	pos	792.7/521.4	1.03	1.00884e+07	1.01671e+07	1.15519e+07	1.1999e+07	1.19022e+07	1.22342e+07	0.880228	0.0410496
TAG50:3-FA16:0	GL-TAG	pos	846.8/573.5	0.86	5.65803e+06	4.6408e+06	5.33852e+06	1.42982e+06	1.51697e+06	1.62985e+06	3.41678	0.000271633
TAG52:3-FA16:0	GL-TAG	pos	874.8/601.5	0.86	2.39159e+06	2.45573e+06	2.58433e+06	626647	715584	694421	3.64895	8.79292e-06
TAG52:3-FA18:0	GL-TAG	pos	874.8/573.5	0.86	924319	1.02655e+06	911774	246158	252017	230250	3.9299	4.27766e-05
TAG52:2-FA18:1	GL-TAG	pos	876.8/577.5	0.86	674388	548369	514824	119286	172247	243270	3.24902	0.00267481
TAG54:3-FA18:0	GL-TAG	pos	902.8/601.5	0.86	341594	367555	413604	113026	94607.2	101304	3.63423	0.000236932
TAG48:2-FA16:1	GL-TAG	pos	820.7/549.4	0.94	160297	173888	214930	92059.2	32479.8	70926.1	2.80927	0.00792236
DAG(18:1/18:2)	GL-DAG	pos	636.5/339.3	0.9	159892	132271	124738	82041.1	75335	84968.5	1.72029	0.00625053
TAG54:2-FA18:1	GL-TAG	pos	904.8/605.5	0.86	80376.7	121395	106327	24279.6	30976.4	33490.8	3.47167	0.00400553
TAG53:3-FA16:0	GL-TAG	pos	888.8/615.5	0.9	95433.2	101291	88735.1	141486	145674	156549	0.643348	0.00079513
TAG50:2-FA16:1	GL-TAG	pos	848.8/577.5	1.02	101302	77861.9	83724.4	15909.7	18419.2	18418.8	4.98389	0.000589654
TAG50:2-FA18:1	GL-TAG	pos	848.8/549.5	0.86	81209.7	74513.8	83721.4	20095	23441.8	30978.4	3.21337	0.000202605
TAG47:2-FA16:1	GL-TAG	pos	806.7/535.4	0.81	79508.9	68654	57750.6	35154.7	47717.4	34223.9	1.7585	0.0179222
TAG54:3-FA16:0	GL-TAG	pos	902.8/629.5	0.88	61808.9	63679.8	73552	26688.6	41052.8	35995.8	1.9187	0.00465558
TAG48:3-FA16:0	GL-TAG	pos	818.7/545.4	0.87	55210.9	55252.9	78697.6	32619.7	35160.9	15057.8	2.2835	0.0243557
TAG53:3-FA17:0	GL-TAG	pos	888.8/601.5	0.92	40776.7	48561	45209	17583.5	18445	15094.3	2.63184	0.000353502
TAG56:3-FA18:0	GL-TAG	pos	930.8/629.5	0.87	43537	36837.6	34325.5	20094	20931.5	26792.8	1.69129	0.010728
TAG52:2-FA16:1	GL-TAG	pos	876.8/605.5	0.96	30050.5	26789.5	25119.2	10013.8	9212.35	2473.12	3.77704	0.00198724
DAG(18:1/20:2)	GL-DAG	pos	664.6/339.3	0.91	17582.8	23463.2	25116	9208.81	12556.5	11721.3	1.97578	0.0120521
TAG52:4-FA16:0	GL-TAG	pos	872.8/599.5	0.86	4.88961e+06	4.67135e+06	4.62506e+06	1.94757e+06	2.0393e+06	2.19937e+06	2.29315	1.70864e-05
TAG52:3-FA18:1	GL-TAG	pos	874.8/575.5	0.86	1.55432e+06	1.66462e+06	1.62437e+06	398535	402718	459655	3.84113	5.97036e-06
TAG53:2-FA18:2	GL-TAG	pos	890.8/593.5	0.86	1.00933e+06	1.02956e+06	1.02211e+06	1.15788e+06	1.20157e+06	1.12836e+06	0.87763	0.00298188
TAG54:4-FA18:0	GL-TAG	pos	900.8/599.5	0.86	726226	951070	915030	297837	350070	339167	2.62627	0.00170607
TAG50:2-FA18:2	GL-TAG	pos	848.8/551.5	0.86	833883	702442	771099	251170	207636	239450	3.30455	0.000181034
TAG54:3-FA18:1	GL-TAG	pos	902.8/603.5	0.86	483923	466336	516998	125578	136472	123905	3.80163	1.9575e-05
TAG52:2-FA18:2	GL-TAG	pos	876.8/579.5	0.86	305594	340754	369230	101310	94609.6	97121	3.46565	0.000201223
TAG54:3-FA20:1	GL-TAG	pos	902.8/575.5	0.9	183348	177349	198411	129050	122344	79481.5	1.68979	0.0104657
TAG51:2-FA18:2	GL-TAG	pos	862.8/565.5	0.71	150698	207630	183353	220186	241960	237770	0.773923	0.0413671
TAG50:3-FA16:1	GL-TAG	pos	846.8/575.5	0.99	157416	199283	169974	44375.6	56097.4	48561.4	3.5339	0.000612276
TAG54:2-FA18:2	GL-TAG	pos	904.8/607.5	0.87	110509	118046	115536	55255.3	32653.3	71161.8	2.16314	0.00563657
TAG53:4-FA17:0	GL-TAG	pos	886.8/599.5	0.86	82879.6	118054	101304	28464.8	35165.2	49394.1	2.67409	0.0060596
TAG52:4-FA18:0	GL-TAG	pos	872.8/571.5	0.86	53582.9	36003.4	49397.6	29300.5	30976.9	32674.4	1.49523	0.0465605
TAG52:3-FA16:1	GL-TAG	pos	874.8/603.5	0.83	56095.3	36004	41862.2	15071.9	2512	10046	4.84842	0.0071394
TAG48:2-FA18:2	GL-TAG	pos	820.7/523.5	0.86	35162.1	30975.8	31813.2	11721.2	10884.4	4185.25	3.65613	0.000933854
TAG54:4-FA16:0	GL-TAG	pos	900.8/627.5	0.86	23442.1	25118	35163	16745.9	15906.6	15072.8	1.75427	0.0313608
TAG52:3-FA20:1	GL-TAG	pos	874.8/547.5	1.03	18421.9	20095.6	25118.5	5023.11	11722	10049	2.37499	0.0124983
TAG52:5-FA16:0	GL-TAG	pos	870.8/597.5	0.86	7.44049e+06	8.06188e+06	7.05007e+06	4.53635e+06	5.59216e+06	5.18489e+06	1.47273	0.00478151
TAG52:4-FA18:1	GL-TAG	pos	872.8/573.5	0.86	3.65566e+06	3.47876e+06	3.42484e+06	1.05235e+06	875779	980787	3.62997	7.8965e-06
TAG54:5-FA18:0	GL-TAG	pos	898.8/597.5	0.86	1.40574e+06	1.44588e+06	1.45736e+06	833945	825555	838954	1.72466	3.0456e-06
TAG54:4-FA18:1	GL-TAG	pos	900.8/601.5	0.86	1.31231e+06	1.43906e+06	1.51839e+06	310629	426170	402725	3.74697	0.000115373
TAG52:3-FA18:2	GL-TAG	pos	874.8/577.5	0.86	1.34129e+06	1.39859e+06	1.38508e+06	424495	496501	467198	2.97146	4.66695e-06
DAG(18:2/18:3)	GL-DAG	pos	632.4/337.3	0.9	1.03247e+06	1.07165e+06	992840	872362	875483	922260	1.15987	0.00697713
TAG54:3-FA18:2	GL-TAG	pos	902.8/605.5	0.86	295140	278102	334017	134467	139677	119844	2.30276	0.000624164
TAG53:3-FA18:2	GL-TAG	pos	888.8/591.5	0.9	209302	225206	215167	137300	172256	139719	1.44605	0.00539825
TAG50:3-FA18:2	GL-TAG	pos	846.8/549.5	0.86	109677	133957	116376	66980.2	67817.3	58607.5	1.86143	0.00207091
TAG52:4-FA16:1	GL-TAG	pos	872.8/601.5	0.86	118059	108009	125588	53587.8	36843.4	56935.2	2.38627	0.00106223
TAG56:4-FA20:1	GL-TAG	pos	928.8/601.5	0.86	113024	94400.5	116348	59448.3	71058.4	88748.3	1.4767	0.0331884
TAG56:4-FA18:1	GL-TAG	pos	928.8/629.5	0.89	108839	92931.2	107162	42698.2	36004.6	44372.4	2.51011	0.000394873
TAG50:4-FA18:1	GL-TAG	pos	844.6/545.3	0.86	30979.4	34325.6	34327	6698.17	7536.92	13395.8	3.60581	0.000547496
TAG48:4-FA18:1	GL-TAG	pos	816.7/517.4	1.07	38512.9	16620.9	31815.2	7536.3	7535.79	2512.83	4.94452	0.0259013
TAG55:4-FA18:1	GL-TAG	pos	914.8/615.5	0.96	20095	11718.9	24282.5	5859.75	4187.17	10882.5	2.68027	0.0494526
TAG52:6-FA16:0	GL-TAG	pos	868.8/595.5	0.86	9.95191e+06	9.98707e+06	1.07015e+07	7.19794e+06	7.75398e+06	7.6705e+06	1.35443	0.000870082
TAG52:4-FA18:2	GL-TAG	pos	872.8/575.5	0.86	2.89527e+06	3.21769e+06	3.32521e+06	1.95704e+06	1.89231e+06	1.91391e+06	1.63764	0.000719162
TAG54:5-FA18:1	GL-TAG	pos	898.8/599.5	0.86	2.54607e+06	3.34954e+06	3.27137e+06	875135	993087	929609	3.27646	0.00118998
TAG50:3-FA18:3	GL-TAG	pos	846.8/551.5	0.86	2.38123e+06	2.22946e+06	2.54667e+06	642179	640507	669811	3.66575	4.67482e-05
TAG51:3-FA18:3	GL-TAG	pos	860.8/565.5	0.71	1.28932e+06	1.30438e+06	1.26168e+06	1.36131e+06	1.37639e+06	1.43582e+06	0.923772	0.0150254
TAG52:3-FA18:3	GL-TAG	pos	874.8/579.5	0.86	1.00917e+06	914281	1.02459e+06	298061	298070	324027	3.20384	4.51049e-05
TAG54:4-FA18:2	GL-TAG	pos	900.8/603.5	0.86	793729	992580	952382	324440	388500	417798	2.42204	0.00129935
TAG54:3-FA18:3	GL-TAG	pos	902.8/607.5	0.9	284650	388325	349567	223065	143561	103553	2.17479	0.0165054
TAG52:5-FA18:1	GL-TAG	pos	870.8/571.5	0.86	205118	221860	256187	156563	139818	136466	1.57831	0.0068391
TAG56:5-FA20:1	GL-TAG	pos	926.8/599.5	0.86	161575	196744	199261	118886	105482	95460.6	1.74337	0.00471297
TAG52:5-FA16:1	GL-TAG	pos	870.8/599.5	0.86	149870	176666	180853	118896	123081	106333	1.45671	0.00833745
TAG53:4-FA18:2	GL-TAG	pos	886.8/589.5	0.86	97118.8	126420	119721	62791.6	62795.9	66980.6	1.78254	0.00499925
TAG56:5-FA18:1	GL-TAG	pos	926.8/627.5	0.92	86230.5	105489	111326	39364.7	51905.4	59444.6	2.01072	0.0060863
TAG48:3-FA18:3	GL-TAG	pos	818.7/523.5	0.85	69343.3	73618.7	74457.4	38515.3	39232.5	22964.4	2.15882	0.00216407
TAG50:4-FA18:2	GL-TAG	pos	844.6/547.3	0.86	69452.8	58628.9	54444	25931.2	27629.4	39173.3	1.96827	0.00804031
DAG(18:2/22:4)	GL-DAG	pos	686.6/337.3	1.13	41025.5	50234.6	52747.4	16744	13397.1	22606.9	2.7301	0.00242676
TAG56:6-FA18:0	GL-TAG	pos	924.8/623.5	0.91	39349.2	25955.4	35164.6	17584.4	21771.7	21769	1.64367	0.0353111
TAG54:5-FA16:1	GL-TAG	pos	898.8/627.5	0.94	12558.2	22603.7	20907.8	6698.74	2512.99	7537.51	3.3476	0.0195184
TAG52:5-FA18:2	GL-TAG	pos	870.8/573.5	0.86	6.40723e+06	7.3596e+06	7.3022e+06	4.40754e+06	4.53489e+06	4.68488e+06	1.54609	0.00146733
TAG54:6-FA18:1	GL-TAG	pos	896.8/597.5	0.86	3.83014e+06	4.36955e+06	4.25339e+06	1.46752e+06	1.71013e+06	1.6441e+06	2.58269	0.000142989
TAG52:4-FA18:3	GL-TAG	pos	872.8/577.5	0.86	3.60405e+06	3.96648e+06	3.79103e+06	1.28984e+06	1.37078e+06	1.55065e+06	2.6979	5.20066e-05
TAG54:5-FA18:2	GL-TAG	pos	898.8/601.5	0.86	2.57621e+06	3.02914e+06	2.74749e+06	1.3591e+06	1.3843e+06	1.38922e+06	2.02119	0.000443848
TAG54:4-FA18:3	GL-TAG	pos	900.8/605.5	0.86	761058	868228	970371	461309	534155	554244	1.67751	0.00630917
TAG53:4-FA18:3	GL-TAG	pos	886.8/591.5	0.9	647533	696149	750953	833430	909420	903978	0.791376	0.00886383
TAG56:5-FA18:2	GL-TAG	pos	926.8/629.5	0.94	421026	448444	466542	544648	516206	613016	0.798158	0.0235707
TAG52:6-FA16:1	GL-TAG	pos	868.8/597.5	0.86	309089	313121	310429	276287	206787	253675	1.26588	0.0333751
TAG50:4-FA18:3	GL-TAG	pos	844.6/549.3	0.86	233584	177490	227725	145678	166628	163260	1.34324	0.0454082
TAG50:5-FA18:2	GL-TAG	pos	842.6/545.3	0.86	82730.2	107161	125452	56817.2	28460.9	54422.8	2.25727	0.0188664
TAG52:7-FA16:0	GL-TAG	pos	866.7/593.4	0.91	77848	97110.9	103814	187530	199229	182509	0.489704	0.000465728
TAG56:5-FA20:2	GL-TAG	pos	926.8/601.5	0.89	63633.5	78706.4	66147.1	51071.6	40190	53587.9	1.43934	0.0269635
TAG56:6-FA18:1	GL-TAG	pos	924.8/625.5	0.85	37675.3	44358.3	65303.6	17581.8	22607.6	19258.5	2.47842	0.0256758
TAG48:4-FA18:3	GL-TAG	pos	816.7/521.4	0.96	35039.5	37669.9	42696	25121.1	12489.3	24871.6	1.84702	0.0203883
TAG52:5-FA18:3	GL-TAG	pos	870.8/575.5	0.86	8.57084e+06	8.06211e+06	8.55208e+06	6.01023e+06	5.9652e+06	5.82427e+06	1.41491	0.000150552
TAG54:6-FA18:2	GL-TAG	pos	896.8/599.5	0.86	4.89057e+06	5.46592e+06	5.16793e+06	2.96987e+06	3.07829e+06	2.74862e+06	1.76478	0.000309579
TAG54:7-FA18:1	GL-TAG	pos	894.8/595.5	0.86	4.69097e+06	5.08042e+06	5.38302e+06	2.09352e+06	2.49438e+06	2.32788e+06	2.19128	0.000289633
TAG54:5-FA18:3	GL-TAG	pos	898.8/603.5	0.86	2.44591e+06	2.66638e+06	2.68829e+06	1.28499e+06	1.39579e+06	1.39107e+06	1.91574	0.000129842
TAG52:6-FA18:2	GL-TAG	pos	868.8/571.5	0.86	723408	708333	859415	613733	627966	585254	1.25409	0.0356672
TAG56:6-FA18:2	GL-TAG	pos	924.8/627.5	0.86	168277	206796	203442	127008	127184	125409	1.52401	0.00578082
TAG48:5-FA18:3	GL-TAG	pos	814.7/519.4	0.96	82046.4	88746.2	83724.5	28096.5	50641.3	55989.8	1.88912	0.0104379
TAG56:6-FA20:2	GL-TAG	pos	924.8/599.5	0.86	67813.1	63628	97013.7	29302.1	22605.3	41862.2	2.43634	0.0196748
TAG52:4-FA20:4	GL-TAG	pos	872.8/551.5	0.97	6698.84	7535.67	5861.42	10883.8	8372.42	11721.2	0.64873	0.0313906
TAG52:6-FA18:3	GL-TAG	pos	868.8/573.5	0.86	1.36027e+07	1.31859e+07	1.29013e+07	1.13124e+07	1.13933e+07	1.11803e+07	1.17128	0.000813212
TAG54:6-FA18:3	GL-TAG	pos	896.8/601.5	0.86	7.04245e+06	7.7346e+06	7.82251e+06	3.55869e+06	4.04669e+06	4.09731e+06	1.93114	0.000268914
TAG56:6-FA18:3	GL-TAG	pos	924.8/629.5	0.85	791247	927736	1.17544e+06	485640	668125	522675	1.72653	0.0318092
TAG52:8-FA16:1	GL-TAG	pos	864.8/593.5	0.91	58604.6	57765.2	75348.7	89583.9	118808	124728	0.575524	0.0184879
TAG54:7-FA18:3	GL-TAG	pos	894.8/599.5	0.86	1.0817e+07	1.13008e+07	1.16736e+07	7.27102e+06	7.77465e+06	8.14096e+06	1.45737	0.000563012
TAG54:8-FA18:2	GL-TAG	pos	892.8/595.5	0.86	4.45355e+06	5.51499e+06	5.91373e+06	2.95812e+06	3.54411e+06	4.04174e+06	1.50629	0.0294862
TAG56:7-FA18:3	GL-TAG	pos	922.8/627.5	0.86	567643	575747	655632	385753	379111	411713	1.52903	0.00223287
TAG52:5-FA22:5	GL-TAG	pos	870.8/523.5	0.86	191723	220183	248657	121396	118048	128093	1.79727	0.00426101
TAG54:6-FA20:4	GL-TAG	pos	896.8/575.5	1.03	20933.8	23444.8	21770.5	12560.3	10047.3	18419.2	1.61234	0.0317933
TAG56:8-FA18:3	GL-TAG	pos	920.8/625.5	0.85	301450	343267	374270	269281	254187	247310	1.32203	0.0199781
TAG54:8-FA20:5	GL-TAG	pos	892.8/573.5	0.98	17159.9	18418.5	19256.6	10884.4	11723.5	11722.8	1.59725	0.000521479
PG(16:0/18:0)	GP-PG	neg	749.5/283.3	1.35	1.97593e+07	2.02782e+07	2.03243e+07	2.18285e+07	2.11651e+07	2.17846e+07	0.931824	0.00630654
PA(16:0/16:0) +AcO	GP-PA	neg	707.5/255.2	1.37	2.52519e+06	2.68214e+06	2.64245e+06	2.00743e+06	1.88308e+06	2.24152e+06	1.28013	0.00763893
PC(16:0/16:0)+AcO	GP-PC	neg	792.6/255.2	6.26	1.33751e+06	1.2078e+06	1.23235e+06	3.07785e+06	2.78001e+06	2.98683e+06	0.427109	6.30284e-05
LPE(18:0)	GP-LPE	neg	480.3/283.3	5.93	1.04749e+06	1214810	1.18807e+06	1.91582e+06	1.85712e+06	1.86967e+06	0.611484	0.000183862
LPC(18:0) +AcO	GP-LPC	neg	582.4/283.3	7.89	1.06216e+06	1.11541e+06	1.12914e+06	1.34711e+06	1.30569e+06	1.36746e+06	0.822511	0.000961274
PE(16:0/16:0)	GP-PE	neg	690.5/255.2	4.34	629031	691871	660077	1.27384e+06	1.20741e+06	1.23607e+06	0.532905	2.57796e-05
LPE(20:0)	GP-LPE	neg	508.3/311.3	5.83	435229	427421	457713	763725	758990	750943	0.580722	5.43088e-06
LPC(20:0) +AcO	GP-LPC	neg	610.4/311.3	7.76	123540	115967	88041.4	197379	180814	189333	0.577152	0.00247665
PC(16:0/14:0)+AcO	GP-PC	neg	764.5/227.2	6.32	17040	18460.7	22720.7	61060	54906.4	57273.6	0.336074	0.000101334
PG(16:0/18:1)	GP-PG	neg	747.5/281.2	1.34	2.96934e+07	3.04151e+07	3.10398e+07	3.35899e+07	3.41239e+07	3.56403e+07	0.881903	0.00500246
PG(16:0/16:1)	GP-PG	neg	719.5/253.2	1.34	8.33231e+06	9.63686e+06	9.87429e+06	1.13515e+07	1.06317e+07	1.16302e+07	0.828346	0.0270479
PE(16:0/18:1)	GP-PE	neg	716.5/281.2	4.23	3.29628e+06	3.26962e+06	3.40071e+06	3.14774e+06	3.15611e+06	3.22879e+06	1.04552	0.038354
LPC(18:1) +AcO	GP-LPC	neg	580.4/281.2	7.73	2.49668e+06	2.58179e+06	2.52795e+06	1.67465e+06	1.7085e+06	1.81196e+06	1.46415	7.57837e-05
PG(18:0/18:1)	GP-PG	neg	775.5/281.2	1.31	1.39751e+06	1.37669e+06	1.53218e+06	1.65275e+06	1.67797e+06	1.59916e+06	0.873529	0.0183085
LPE(18:1)	GP-LPE	neg	478.3/281.2	5.82	801591	849634	822416	980274	1.0153e+06	967729	0.834758	0.0012045
PE(16:0/16:1)	GP-PE	neg	688.5/253.2	4.31	665482	674977	712922	1.02713e+06	984536	957126	0.691656	0.000258495
PC(16:0/16:1)+AcO	GP-PC	neg	790.6/253.2	6.24	403754	405174	376300	567054	488006	498421	0.76295	0.00981366
PI(16:0/16:1)	GP-PI	neg	807.5/253.2	1.1	221046	208977	271221	389317	365414	372987	0.621826	0.00219715
PE(18:0/16:1)	GP-PE	neg	716.5/283.3	4.22	45437.8	40130.8	46433.5	85461.9	74035.2	74598.9	0.56388	0.00126307
PG(14:0/18:1)	GP-PG	neg	719.5/281.2	1.36	30292.9	37866.4	32660	41180	49700	41652.9	0.760712	0.0410385
PE(14:0/18:1)	GP-PE	neg	688.5/281.2	4.31	8992.89	13255.4	11360.7	7100	8520.74	6626.43	1.51071	0.0493726
PI(14:0/18:1)	GP-PI	neg	807.5/281.2	1.28	8046.43	8992.86	10412.9	15145.7	12780	15620	0.630421	0.00859189
PE(16:0/18:2)	GP-PE	neg	714.5/279.2	4.24	3.04017e+07	3.0445e+07	3.20251e+07	3.40372e+07	3.25577e+07	3.37345e+07	0.925669	0.0236857
PG(18:1/18:1)	GP-PG	neg	773.5/281.2	1.31	7.26303e+06	7.58963e+06	7.81168e+06	9.23887e+06	9.21961e+06	8.96816e+06	0.826362	0.000944499
LPC(18:2) +AcO	GP-LPC	neg	578.3/279.2	7.81	7.00369e+06	7.71293e+06	7.43036e+06	5.43449e+06	5.31733e+06	5.3171e+06	1.37825	0.000643465
LPE(18:2)	GP-LPE	neg	476.3/279.2	5.81	5.62228e+06	6.20089e+06	6.42498e+06	8.03096e+06	8.06983e+06	8.38476e+06	0.745262	0.00140664
PE(18:0/18:2)	GP-PE	neg	742.5/279.2	4.18	3.39724e+06	3.5112e+06	3.24934e+06	4.4427e+06	3.97346e+06	4.4245e+06	0.791064	0.00640712
PC(18:0/18:2)+AcO	GP-PC	neg	844.6/279.2	6.09	2.16903e+06	2.16117e+06	2.00702e+06	2.48143e+06	2.4547e+06	2.32507e+06	0.872753	0.0125748
PE(O-18:0/18:2)	GP-PE	neg	728.6/279.2	4.25	1.17031e+06	1.09929e+06	1.13728e+06	1.0471e+06	1.06619e+06	1.0892e+06	1.06382	0.0461227
PC(18:1/18:1)+AcO	GP-PC	neg	844.6/281.2	6.06	789046	692960	741240	626221	616280	593560	1.21088	0.011748
PE(P-18:0/18:2)	GP-PE	neg	726.5/279.2	4.24	326599	320449	354996	254888	284705	244238	1.27839	0.0107231
PE(O-16:0/18:2)	GP-PE	neg	700.5/279.2	4.29	284979	278231	258534	309256	324763	332416	0.850284	0.00993849
PC(14:0/18:2)+AcO	GP-PC	neg	788.5/279.2	6.26	268377	272166	250394	159986	141053	169926	1.67939	0.000591651
PE(14:0/18:2)	GP-PE	neg	686.5/279.2	4.32	250723	264025	231933	211094	212996	212106	1.17366	0.0168286
LPE(20:2)	GP-LPE	neg	504.3/307.3	5.91	132530	142474	142946	199754	193588	198329	0.70639	0.000116688
LPA(18:2) +AcO	GP-LPA	neg	493.3/279.2	1.56	17986.4	17040.7	39760	59640	69580.7	88514.3	0.343478	0.0133515
PE(16:0/18:3)	GP-PE	neg	712.5/277.2	4.27	4.8342e+07	4.67502e+07	4.69723e+07	4.44973e+07	4.44735e+07	4.558e+07	1.05584	0.0153731
PC(16:0/18:3)+AcO	GP-PC	neg	814.6/277.2	6.2	1.98473e+07	1.95328e+07	1.90147e+07	1.73605e+07	1.67997e+07	1.70491e+07	1.14031	0.00120253
PG(18:2/16:1)	GP-PG	neg	743.5/279.2	1.32	1.32595e+07	1.39533e+07	1.3532e+07	1.54575e+07	1.67934e+07	1.59982e+07	0.844466	0.00462157
LPE(18:3)	GP-LPE	neg	474.3/277.2	5.87	9.08552e+06	9.40547e+06	9.70452e+06	9.8158e+06	1.01492e+07	1.04458e+07	0.927156	0.0443329
PE(18:0/18:3)	GP-PE	neg	740.5/277.2	4.19	7.7776e+06	7.62858e+06	7.62886e+06	7.90464e+06	8.05764e+06	8.26874e+06	0.950643	0.0268289
LPC(18:3) +AcO	GP-LPC	neg	576.3/277.2	7.88	6.25709e+06	6.46936e+06	6.81862e+06	4.23191e+06	4.2407e+06	4.42437e+06	1.51548	0.000225502
PE(O-18:0/18:3)	GP-PE	neg	726.5/277.2	4.27	2.73749e+06	2.70139e+06	2.66329e+06	1.96478e+06	1.89543e+06	1.97902e+06	1.38754	2.31756e-05
PE(P-18:0/18:3)	GP-PE	neg	724.5/277.2	4.26	758839	736750	687541	531940	476355	542607	1.40765	0.00201188
PC(14:0/18:3)+AcO	GP-PC	neg	786.5/277.2	6.28	626219	629209	631806	411008	365087	395930	1.61023	6.23664e-05
PE(18:2/16:1)	GP-PE	neg	712.5/279.2	4.2	202246	183736	207270	265487	257596	245495	0.771883	0.00317185
LPE(20:3)	GP-LPE	neg	502.3/305.2	5.96	112654	91352.9	104131	144836	134900	159040	0.702266	0.00960061
PE(18:2/20:1)	GP-PE	neg	768.6/309.3	4.13	94629.4	91647.5	87562.7	68973.1	60588	67065.8	1.39269	0.00139391
LPC(20:3) +AcO	GP-LPC	neg	604.4/305.2	7.94	21299.3	19880.7	19407.1	28874.3	31239.3	26033.6	0.703298	0.00610208
PE(18:1/18:3)	GP-PE	neg	738.5/277.2	4.19	5.44017e+06	5.19664e+06	5.26146e+06	4.37088e+06	4.29179e+06	4.56919e+06	1.20151	0.00127672
PG(18:2/18:2)	GP-PG	neg	769.5/279.2	1.32	4.11896e+06	4.23822e+06	4.12071e+06	4.63981e+06	5.06375e+06	5.03849e+06	0.846415	0.00615767
PC(18:1/18:3)+AcO	GP-PC	neg	840.6/277.2	6.11	3.59814e+06	3.45506e+06	3.51123e+06	2.86873e+06	2.73906e+06	2.62048e+06	1.28392	0.000715486
PI(18:1/18:3)	GP-PI	neg	857.5/277.2	1.17	1.99605e+06	1.5123e+06	1.88659e+06	1.45462e+06	1.31856e+06	1.15015e+06	1.37509	0.0454469
PE(18:2/18:3)	GP-PE	neg	736.5/277.2	4.2	1.04431e+07	1.05918e+07	1.02958e+07	8.175e+06	8.06584e+06	8.65264e+06	1.25859	0.000423052
PC(18:2/18:3)+AcO	GP-PC	neg	838.6/277.2	6.14	8.33979e+06	7.85744e+06	8.01627e+06	6.70326e+06	6.33772e+06	6.29028e+06	1.25256	0.0010786
PE(16:0/22:6)	GP-PE	neg	762.5/327.2	4.52	17514.3	24140	15146.4	27454.3	29820.7	29820	0.65217	0.022748
SM 38:0;2	SP-SM	pos	761.6/184.1	6.15	3.19239e+07	3.26198e+07	3.17697e+07	2.97727e+07	3.0614e+07	3.02531e+07	1.06259	0.00612495
SM 40:0;4	SP-SM	pos	821.7/184.1	6.25	4.46388e+06	4.25869e+06	5.62164e+06	2.47543e+06	1.37507e+06	2.17881e+06	2.37908	0.00667872
SM 42:0;2	SP-SM	pos	817.9/184.1	6.17	4.1437e+06	4.47905e+06	4.27951e+06	4.68442e+06	4.78331e+06	4.96666e+06	0.893856	0.0161627
SM 36:0;2	SP-SM	pos	733.6/184.1	6.22	3.27632e+06	3.22845e+06	3.27247e+06	4.00544e+06	3.94817e+06	3.95974e+06	0.820697	6.79731e-06
SM 34:0;3	SP-SM	pos	721.6/184.1	6.27	138560	112196	131447	365896	416969	402727	0.322373	9.78554e-05
DCER(18:0)	SP-DCER	pos	568.7/266.4	1.49	82915.6	113029	143678	182278	303174	196252	0.498196	0.053335
SM 44:0;3	SP-SM	pos	861.6/184.1	6.25	96253.9	106715	119126	213157	256128	170391	0.503528	0.0144666
HCER(16:0)	SP-HCER	pos	700.7/264.4	1.17	61953.2	73674.5	77860.6	113858	127255	102137	0.621962	0.00757551
SM 42:1;2	SP-SM	pos	815.7/184.1	6.2	7.53856e+06	7.73577e+06	7.94457e+06	6.87564e+06	7.30621e+06	7.2436e+06	1.08371	0.0284778
SM 34:1;4	SP-SM	pos	735.6/184.1	6.24	6.46642e+06	6.72036e+06	6.62582e+06	1.20035e+07	1.28517e+07	1.26842e+07	0.527781	2.56917e-05
SM 44:1;2	SP-SM	pos	843.7/184.1	6.07	5.70937e+06	5.71004e+06	6.06103e+06	6.28139e+06	6.11691e+06	6.1874e+06	0.940532	0.0434992
SM 38:1;3	SP-SM	pos	775.6/184.1	6.11	2.46794e+06	2.416e+06	2.4445e+06	1.98489e+06	1.9807e+06	1.95311e+06	1.23818	1.28646e-05
SM 32:1;2	SP-SM	pos	675.6/184.1	6.83	163256	136463	179996	68653.4	80372.6	67816.9	2.21227	0.00275677
SM 34:1;2	SP-SM	pos	703.6/184.1	6.91	117211	153213	136883	84554.8	97114.8	94605.7	1.47428	0.016997
SM 42:2;3	SP-SM	pos	829.7/184.1	6.11	2.05928e+06	2.11119e+06	2.07223e+06	2.76863e+06	2.82715e+06	2.86615e+06	0.737741	2.16677e-05
SM 36:2;2	SP-SM	pos	729.7/184.1	6.26	1.86143e+06	1.98136e+06	1.85375e+06	1.21826e+06	1.25091e+06	1.15295e+06	1.57271	0.000163005
SM 30:2;4	SP-SM	pos	677.6/184.1	6.96	82043.6	99206.7	82044.9	29303.2	56092	31811.2	2.24642	0.00906038
SM 34:2;3	SP-SM	pos	717.6/184.1	7.53	39350	40188	44370.9	55263.3	72006.8	56096.2	0.675745	0.0249251
SM 32:2;3	SP-SM	pos	689.6/184.1	6.62	24281.5	19255	28468	7534	16743.9	14230.7	1.86983	0.0433584
SM 38:3;3	SP-SM	pos	771.5/184.1	6.14	6.53062e+06	6.86125e+06	6.54245e+06	5.058e+06	5.44961e+06	5.48205e+06	1.2467	0.00164541
SM 42:3;2	SP-SM	pos	811.6/184.1	6.05	4.68851e+06	4.66243e+06	5.08677e+06	3.30385e+06	3.91651e+06	3.97445e+06	1.28968	0.0132222
SM 44:3;3	SP-SM	pos	855.6/184.1	6.01	1.27679e+06	1.26278e+06	1.30423e+06	1.48584e+06	1.55136e+06	1.49359e+06	0.848375	0.000672698
SM 40:4;3	SP-SM	pos	797.6/184.1	6.08	2.71673e+06	2.75099e+06	2.8e+06	2.18529e+06	2.5692e+06	2.35201e+06	1.1634	0.0271983

## Sheet: Table S9
Table S9 TOP 1% selective sweeps of XIS49
Chromosome	Likelihood	StartPos (v2)	EndPos (v2)
1	83.5	3073693	3696504
1	64.5	3268476	3908618
1	52.4	3271567	3440091
1	72	4301984	6550771
1	73.7	5272609	6644352
1	103	5432277	8343299
1	74.4	5438761	6407915
1	114	5542949	8819675
1	132	5570953	8134453
1	124	6083418	7573018
1	116	6135078	8281286
1	331	6222361	8249813
1	74.1	6283157	7313531
1	337	6343693	8186046
1	50.6	6563213	9073678
1	237	6585811	7995887
1	72.9	6819536	8758368
1	153	6976537	7670109
1	97.2	7293010	7470807
1	98	7324610	8134453
1	64.2	7384802	7995887
1	89.9	8041136	9934563
1	90.3	8402043	9751759
1	92.2	8521973	9333799
1	69.5	8678987	9585915
1	107	8965406	9240248
1	78.4	9876371	11071396
1	120	9933223	11073665
1	144	10197291	10867924
1	126	10326907	10796148
1	119	10927127	13115339
1	196	11179078	12921912
1	192	11244807	12923482
1	57.3	13747883	17062891
1	53.8	13877772	16990742
1	92.5	14025344	16903038
1	133	14253096	16731009
1	139	14778146	16384579
1	140	14814371	16288865
1	79.9	16644879	17783283
1	66	16777228	16990742
1	101	16816315	17730969
1	88.1	19225613	19578321
1	176	19270272	21399892
1	199	19367269	21359519
1	94	19495675	20823585
1	72.7	19749967	20690449
1	98.4	19823631	20962440
1	178	19954675	20891709
1	60.5	19972711	20406096
1	53.5	20167807	21804229
1	83.2	20190634	21702611
1	124	20215087	20687843
1	98.3	20444659	21394165
1	75.1	21075955	24846611
1	118	21591199	23926560
1	183	21679109	24007970
1	304	21702611	23861879
1	259	26733169	29145506
1	57	27095829	29145506
1	352	27718525	29145506
1	453	27822222	29145506
1	244	28229756	29012396
3	163	62	2376555
3	153	62	2117630
3	83.3	62	1771313
3	135	25581	1647044
3	73.1	2704014	3432845
3	111	2822598	7691460
3	129	2849671	3201265
3	141	4208044	11719278
3	163	4226265	6128315
3	217	4303368	6128315
3	224	4558128	11448906
3	206	6806346	9042593
3	129	7410660	8199407
3	55.3	9032604	10237998
3	87.4	9157511	10506600
3	54.5	9434462	9996580
3	56.7	13386595	15757182
3	157	15071517	15827001
3	78.9	23614500	24966961
3	107	23864099	24796374
3	148	24584413	25434363
3	51.3	32115048	34065959
3	71.2	32381423	34201439
3	65.9	32390520	34265461
3	184	32474116	34425725
3	63.1	33091421	33245051
3	106	33252386	33557017
3	70.4	38261241	39781429
4	121	2623	1105509
4	87	2623	1426245
4	81.4	154246	641513
4	51.8	1764447	1816950
4	78.3	2619666	4558250
4	127	5802550	7096372
4	102	6363510	6584348
4	84.6	7531317	8365135
4	86.9	7658205	8003395
4	77.7	13828164	14405121
4	70.6	13995864	14287278
4	71.1	17538452	18107758
4	163	17597846	17996835
4	85.6	17685949	17858888
4	65	19519236	23424209
4	71	19571728	23424209
4	88.5	19640518	23424209
4	70.1	20256658	20729948
4	52.1	20680671	21803502
4	52.9	21538078	22638316
4	72.8	21859068	22408510
4	77.3	21980939	22243219
5	55.8	386928	1352782
5	65.2	10732102	11208825
5	60.7	10790398	11316966
5	50.4	11742306	12774907
5	51.8	11812042	12647032
5	188	16658446	19079225
5	63.8	16711466	19756070
5	157	16773239	19576981
5	104	16821191	19587338
5	92.1	16924454	18870418
5	95.1	17454168	18107708
5	126	17482807	18832021
5	95.6	17597936	18590562
5	120	17673855	18575077
5	102	17948230	18185314
5	92.9	22290533	24614000
5	51.5	22428466	24417454
5	77.2	26907691	27567988
6	344	1446689	3151944
6	211	1508760	3150282
6	132	1658166	3112838
6	51	3104663	3653259
6	79.2	3417172	4502415
6	77.6	3606082	5302320
6	155	4237796	4848175
6	50.4	8124128	8760425
6	94.1	11409064	12519721
6	110	12842245	13818659
6	81.9	13061935	13424858
6	86.9	13130583	13472611
6	78.4	15953568	16992453
6	54.3	16065826	16936790
6	125	20933124	22317770
6	108	20933124	22259248
6	118	21210803	21923248
6	168	21767251	22413951
6	61.6	24257371	25278962
6	107	24444483	24977394
6	68.8	24493720	25102557
6	68.4	24571096	24907543
6	53.2	24918086	25662469
6	64.8	26238626	27865291
6	69.4	27540519	29075693
6	119	27902477	29075693
6	84.5	27902477	29075693
7	149	2971359	4356878
7	69	2978888	4298734
7	199	3138612	4216413
7	173	3357236	4037205
7	60.6	5439807	6034389
7	96.5	6310075	6819234
7	50.4	6971683	7581882
7	83.3	7026845	7567543
7	57.3	7215593	7420294
7	164	10339853	11408662
7	69.6	10359515	11352970
7	150	10367266	11421405
7	206	10465715	11400277
7	51.9	10478852	11155944
7	72.9	10588432	11007484
7	77.8	10705584	11121229
7	53.3	10946352	11189618
7	54.8	10982209	11114679
7	60.8	11547028	12473907
7	74.8	11588536	12470739
7	188	11851045	13631910
7	288	11857764	13576215
7	101	11860667	13696642
7	304	11870928	13532749
7	136	11871896	13645117
7	367	11896351	13468070
7	304	12037628	13300073
7	385	12055377	13237836
7	330	12187143	13065736
7	428	12195445	13019057
7	371	12274713	12901954
7	462	16725721	19226372
7	467	16799968	19226372
7	199	16848104	19226372
7	566	16865889	19226372
7	179	16878364	19226372
7	146	16981238	19226372
7	591	17002915	19226372
7	111	17053064	19226372
7	83.2	17097588	19226372
7	538	17110312	19071832
7	71.3	17178871	19226372
7	444	17197055	18938436
7	228	17217221	19226372
7	161	17252917	19191217
7	61.1	17300513	19226372
7	224	17476651	18629236
7	180	17828747	19226372
7	123	18022552	19226372
7	57.3	18178795	19226372
7	192	18233990	19226372

## Sheet: Table S10
Table S10 Domestication-associated SVs (dSV) associating genes
SV_query_chr	SV_query_start	SV_query_end	Retate_gene	GO-annotation	Interpro-annotation	Nr-annotation	Swissprot-annotation
chr1	261329	265447	CsaV3_1G000450	GO:0003677 DNA binding	IPR004333 SBP domain	Squamosa promoter-binding protein-like (SBP domain) transcription factor family protein[SPL13A, SPL13][AT5G50570.2]	Squamosa promoter-binding-like protein 13B OS=Arabidopsis thaliana
chr1	890185	954779	CsaV3_1G001470	GO:0016301 kinase activity	IPR000403 Phosphatidylinositol 3-/4-kinase, catalytic domain	ataxia-telangiectasia mutated[ATM, ATATM][AT3G48190.1]	Serine/threonine-protein kinase ATM OS=Arabidopsis thaliana
chr1	961250	970995	CsaV3_1G001490	-	IPR012442 Protein of unknown function DUF1645, plant	Protein of unknown function (DUF1645)[AT5G62770.1]	-
chr1	1051117	1055704	CsaV3_1G001620	GO:0003824 catalytic activity	IPR001045 Spermidine/spermine synthases	spermidine synthase 1[SPDS1][AT1G23820.1]	Spermidine synthase OS=Coffea arabica
chr1	1168281	1170721	CsaV3_1G001800	GO:0004842 ubiquitin-protein transferase activity	IPR000225 Armadillo	plant U-box 38[PUB38, ATPUB38][AT5G65200.1]	U-box domain-containing protein 38 OS=Arabidopsis thaliana
chr1	1184131	1188307	CsaV3_1G001820	-	-	unknown protein[AT3G48180.1]	-
chr1	1188758	1193952	CsaV3_1G001830	GO:0008152 metabolic process	IPR015590 Aldehyde dehydrogenase domain	aldehyde dehydrogenase 10A8[ALDH10A8][AT1G74920.1]	Betaine aldehyde dehydrogenase 1, chloroplastic OS=Arabidopsis thaliana
chr1	1232528	1236547	CsaV3_1G001890	GO:0005874 microtubule	IPR000357 HEAT repeat	ARM repeat superfamily protein[AT5G62580.1]	TORTIFOLIA1-like protein 3 OS=Arabidopsis thaliana
chr1	1333655	1345244	CsaV3_1G002070	GO:0016579 protein deubiquitination	IPR001394 Peptidase C19, ubiquitin carboxyl-terminal hydrolase	Ubiquitin carboxyl-terminal hydrolase-related protein[AT3G47890.1]	Inactive ubiquitin carboxyl-terminal hydrolase 54 OS=Mus musculus
chr1	1353020	1358790	CsaV3_1G002090	-	-	-	-
chr1	1759751	1773057	CsaV3_1G002800	GO:0004386 helicase activity	IPR001650 Helicase, C-terminal	RNA helicase family protein[EMB2733, ESP3][AT1G32490.1]	Pre-mRNA-splicing factor ATP-dependent RNA helicase DEAH1 OS=Arabidopsis thaliana
chr1	1952410	1960691	CsaV3_1G003150	GO:0000287 magnesium ion binding	IPR004531 Phenylalanyl-tRNA synthetase, class IIc, beta subunit, archae/euk cytosolic	tRNA synthetase beta subunit family protein[AT1G72550.1]	Phenylalanine--tRNA ligase beta subunit, cytoplasmic OS=Arabidopsis thaliana
chr1	1992123	2002518	CsaV3_1G003220	GO:0006508 proteolysis	IPR002142 Peptidase S49	signal peptide peptidase[SPPA, SPPA1][AT1G73990.1]	Serine protease SPPA, chloroplastic OS=Arabidopsis thaliana
chr1	2054432	2058461	CsaV3_1G003310	GO:0005515 protein binding	IPR001660 Sterile alpha motif domain	Sterile alpha motif (SAM) domain-containing protein[AT3G48800.1]	-
chr1	2172649	2184142	CsaV3_1G003490	GO:0003723 RNA binding	IPR000061 SWAP/Surp	SWAP (Suppressor-of-White-APricot)/surp domain-containing protein[TGH][AT5G23080.1]	G patch domain-containing protein TGH OS=Arabidopsis thaliana
chr1	2202641	2204263	CsaV3_1G003540	GO:0016853 isomerase activity	IPR004265 Dirigent protein	Disease resistance-responsive (dirigent-like protein) family protein[AT1G55210.2]	Dirigent protein 20 OS=Arabidopsis thaliana
chr1	2289372	2292902	CsaV3_1G003660	GO:0003735 structural constituent of ribosome	IPR000289 Ribosomal protein S28e	Nucleic acid-binding, OB-fold-like protein[AT5G03850.1]	40S ribosomal protein S28 OS=Zea mays
chr1	2454211	2464204	CsaV3_1G003960	GO:0008270 zinc ion binding	IPR001841 Zinc finger, RING-type	zinc finger protein-related[EMB2454, BTS][AT3G18290.1]	Zinc finger protein BRUTUS OS=Arabidopsis thaliana
chr1	2569251	2577675	CsaV3_1G004100	GO:0004386 helicase activity	IPR001650 Helicase, C-terminal	DEA(D/H)-box RNA helicase family protein[AT1G48650.1]	DExH-box ATP-dependent RNA helicase DExH3 OS=Arabidopsis thaliana
chr1	2609750	2626066	CsaV3_1G004190	GO:0006855 drug transmembrane transport	IPR002528 Multi antimicrobial extrusion protein	MATE efflux family protein[AT5G52450.1]	Protein DETOXIFICATION 16 OS=Arabidopsis thaliana
chr1	2640208	2646379	CsaV3_1G004220	GO:0005515 protein binding	IPR001680 WD40 repeat	transducin family protein / WD-40 repeat family protein[AT3G18060.1]	Actin-interacting protein 1-2 OS=Arabidopsis thaliana
chr1	2686299	2688347	CsaV3_1G004290	GO:0005509 calcium ion binding	IPR002048 EF-hand domain	Calcium-binding EF-hand family protein[AT1G18210.2]	Probable calcium-binding protein CML27 OS=Arabidopsis thaliana
chr1	2769801	2772344	CsaV3_1G004410	GO:0016853 isomerase activity	IPR008183 Aldose 1-/Glucose-6-phosphate 1-epimerase	Galactose mutarotase-like superfamily protein[AT3G17940.1]	Aldose 1-epimerase OS=Sus scrofa
chr1	2773101	2781324	CsaV3_1G004420	GO:0003676 nucleic acid binding	IPR000629 ATP-dependent RNA helicase DEAD-box, conserved site	P-loop containing nucleoside triphosphate hydrolases superfamily protein[AT1G20920.1]	DEAD-box ATP-dependent RNA helicase 42 OS=Arabidopsis thaliana
chr1	2773948	2778133	CsaV3_1G004430	GO:0003735 structural constituent of ribosome	IPR000196 Ribosomal protein L19/L19e	Ribosomal protein L19e family protein[AT3G16780.1]	60S ribosomal protein L19-2 OS=Arabidopsis thaliana
chr1	2782345	2798659	CsaV3_1G004440	GO:0005975 carbohydrate metabolic process	IPR000771 Fructose-bisphosphate aldolase, class-II	ketose-bisphosphate aldolase class-II family protein[AT1G18270.1]	D-tagatose-1,6-bisphosphate aldolase subunit GatY OS=Salmonella typhimurium
chr1	2855998	2860487	CsaV3_1G004530	GO:0003676 nucleic acid binding	IPR001878 Zinc finger, CCHC-type	zinc knuckle (CCHC-type) family protein[AT3G43590.1]	DNA-binding protein HEXBP OS=Leishmania major
chr1	2862807	2873216	CsaV3_1G004540	GO:0004672 protein kinase activity	IPR000719 Protein kinase domain	Protein kinase superfamily protein[TSL][AT5G20930.1]	Serine/threonine-protein kinase TOUSLED OS=Arabidopsis thaliana
chr1	2891604	2903110	CsaV3_1G004570	GO:0016866 intramolecular transferase activity	IPR002365 Terpene synthase, conserved site	cycloartenol synthase 1[CAS1][AT2G07050.1]	Probable oxidosqualene cyclase OS=Cucurbita pepo
chr1	2978497	2983163	CsaV3_1G004690	GO:0016020 membrane	IPR003663 Sugar/inositol transporter	inositol transporter 2[ATINT2, INT2][AT1G30220.1]	Probable inositol transporter 2 OS=Arabidopsis thaliana
chr1	3027039	3056821	CsaV3_1G004780	GO:0003677 DNA binding	IPR003340 B3 DNA binding domain	high-level expression of sugar-inducible gene 2[HSI2, VAL1][AT2G30470.1]	B3 domain-containing protein Os07g0679700 OS=Oryza sativa subsp. japonica
chr1	3067531	3115802	CsaV3_1G004790	GO:0005515 protein binding	IPR000719 Protein kinase domain	Leucine-rich repeat protein kinase family protein[AT1G06840.1]	Probable LRR receptor-like serine/threonine-protein kinase At1g06840 OS=Arabidopsis thaliana
chr1	3292319	3312628	CsaV3_1G004960	GO:0006457 protein folding	IPR002939 Chaperone DnaJ, C-terminal	Molecular chaperone Hsp40/DnaJ family protein[AT3G17830.1]	Chaperone protein DnaJ OS=Synechococcus sp. (strain ATCC 27264 / PCC 7002 / PR-6)
chr1	3312789	3325963	CsaV3_1G004980	-	IPR001623 DnaJ domain	Molecular chaperone Hsp40/DnaJ family protein[AT3G17830.1]	Chaperone protein dnaJ A6, chloroplastic OS=Arabidopsis thaliana
chr1	3331611	3334752	CsaV3_1G005000	GO:0004351 glutamate decarboxylase activity	IPR002129 Pyridoxal phosphate-dependent decarboxylase	glutamate decarboxylase 5[GAD5][AT3G17760.2]	Glutamate decarboxylase OS=Solanum lycopersicum
chr1	3503806	3504411	CsaV3_1G005290	GO:0046983 protein dimerization activity	IPR011598 Myc-type, basic helix-loop-helix (bHLH) domain	basic helix-loop-helix (bHLH) DNA-binding family protein[AT3G28857.1]	Transcription factor PRE5 OS=Arabidopsis thaliana
chr1	3990591	3995578	CsaV3_1G006250	-	-	breaking of asymmetry in the stomatal lineage[BASL][AT5G60880.1]	Protein BREAKING OF ASYMMETRY IN THE STOMATAL LINEAGE OS=Arabidopsis thaliana
chr1	3991872	3995578	CsaV3_1G006260	-	-	movement protein binding protein 2C[MPB2C][AT5G08120.1]	-
chr1	4118084	4135335	CsaV3_1G006480	GO:0005488 binding	IPR011989 Armadillo-like helical	TBP-associated factor 2[TAF2][AT1G73960.1]	Transcription initiation factor TFIID subunit 2 OS=Arabidopsis thaliana
chr1	4146372	4163900	CsaV3_1G006490	-	IPR005333 Transcription factor, TCP	TCP family transcription factor [BRC1, TCP18, ATTCP18][AT3G18550.2]	Transcription factor TCP18 OS=Arabidopsis thaliana
chr1	4473151	4477513	CsaV3_1G007060	GO:0004707 MAP kinase activity	IPR000719 Protein kinase domain	MAP kinase 9[MPK9][AT3G18040.1]	Mitogen-activated protein kinase 9 OS=Arabidopsis thaliana
chr1	4614455	4616853	CsaV3_1G007290	-	IPR018866 Zinc-finger domain of monoamine-oxidase A repressor R1	Zinc-finger domain of monoamine-oxidase A repressor R1[AT4G37110.1]	Cell division cycle-associated 7-like protein OS=Rattus norvegicus
[truncated: 992 more rows]
